# Supplementary material
Source: HighWire-hosted journal article supplement (https://gut.bmj.com/content/68/6/1014)
Supplement: inline-supplementary-material-1 [file inline-supplementary-material-1.pdf]

## Supplementary Tables

### **Gut microbiome analysis as a tool towards targeted non-invasive biomarkers for early hepatocellular carcinoma**

#### **Running title: Gut microbiome for early hepatocellular carcinoma**

Zhigang Ren<sup>1,3,2†</sup>, Ang Li<sup>2,4,3†</sup>, Jianwen Jiang<sup>1,4,9†</sup>, Lin Zhou<sup>1,4†</sup>, Zujiang Yu<sup>3,2†</sup>, Haifeng Lu<sup>4</sup>, Haiyang Xie<sup>1,4</sup>, Xiaolong Chen<sup>3,2</sup>, Li Shao<sup>4</sup>, Ruiqing Zhang<sup>5,8</sup>, Shaoyan Xu<sup>1</sup>, Hua Zhang<sup>4</sup>, Guangying Cui<sup>3,2</sup>, Xinhua Chen<sup>1,4</sup>, Ranran Sun<sup>3,2</sup>, Hao Wen<sup>8</sup>, Jan Lerut<sup>6</sup>, Quancheng Kan<sup>7\*</sup>, Lanjuan Li<sup>4\*</sup>, and Shusen Zheng<sup>1,4,10\*</sup>

<sup>1</sup> Department of Hepatobiliary and Pancreatic Surgery, the First Affiliated Hospital, School of Medicine, Zhejiang University; Key Laboratory of Combined Multi-organ Transplantation, Ministry of Public Health, Hangzhou 310003, China.

<sup>2</sup> Gene Hospital of Henan Province; Precision Medicine Center, the First Affiliated Hospital of Zhengzhou University, Zhengzhou 450052, China.

<sup>3</sup> Department of Infectious Diseases, the First Affiliated Hospital of Zhengzhou University, Zhengzhou 450052, China.

<sup>4</sup> State Key Laboratory for Diagnosis and Treatment of Infectious Disease; Collaborative Innovation Center for Diagnosis and Treatment of Infectious Diseases, Zhejiang University, Hangzhou 310003, China.

<sup>5</sup> Hepatobiliary and Hydatid Department, Digestive and Vascular Surgery Centre, Xinjiang Key Laboratory of Echinococcosis, the First Affiliated Hospital of Xinjiang Medical University, Urumqi, Xinjiang 830054, China.

<sup>6</sup> Starzl Unit Abdominal Transplantation, University Hospitals Saint Luc, Université

catholique Louvain, UCL Brussels, Belgium.

<sup>7</sup> Department of Pharmacy, the First Affiliated Hospital of Zhengzhou University, Zhengzhou 450052, China.

<sup>8</sup> State Key Laboratory of Pathogenesis, Prevention and Treatment of High Incidence Diseases in Central Asia, Xinjiang Medical University, Urumqi, Xinjiang 830054, China.

<sup>9</sup> Health Management Center, First Affiliated Hospital, School of Medicine, Zhejiang University, Hangzhou 310003, China.

<sup>10</sup> Department of Hepatobiliary and Pancreatic Surgery, Shulan (Hangzhou) Hospital, Hangzhou 310022, China.

<sup>†</sup>These authors contributed equally to this work.

**Supplementary Table legends 1-12:**

**Supplementary table S1.** Phenotype information of all Chinese individuals in the discovery phase (N=190), validation phase (N=131) and independent diagnosis phase (N=98).

**Supplementary table S2.** Taxon annotation of 1296 OTUs from all samples.

**Supplementary table S3.** The detailed values of fecal microbial diversity index in the discovery cohort (75 healthy controls, 40 liver cirrhosis and 75 early HCC with cirrhosis).

**Supplementary table S4.** Stool form scale was assessed based on stool routine testing and stool moisture was measured by lyophilization assay on the frozen homogenized faecal material.

**Supplementary table S5.** The different OTUs and the corresponding annotation among healthy controls (N=75), liver cirrhosis (N=40) and early HCC with cirrhosis (N=75).

**Supplementary table S6.** The different degree of phylum level (p value) among healthy controls (N=75), liver cirrhosis (N=40) and early HCC with cirrhosis (N=75) in the discovery phase.

**Supplementary table S7.** The different degree of genera level (p value) between liver cirrhosis cohort and early HCC cohort in the discovery phase.

**Supplementary table S8.** The different degree of genera level (p value) between the healthy controls and the early HCC cohort in the discovery phase.

**Supplementary table S9.** The relative abundance of the 30 OTUs markers in each

sample from the discovery cohort.

**Supplementary table S10.** The corresponding bacterial genera of the selected 30 OTUs markers in the discovery phase.

**Supplementary table S11.** The corresponding POD value of each patient was calculated in the 75 early HCC and 105 non-HCC samples (40 cirrhosis and 75 controls) in the discovery set.

**Supplementary table S12.** The corresponding POD value of each patient was calculated among the 56 controls, 30 early HCC samples and 45 advanced HCC samples from the validation phase, and among the 18 Xinjiang HCC samples and 80 Zhengzhou HCC samples from the independent diagnosis phase.

**Table S1. Clinical phenotype information of all enrolled individuals**

| Stage     | Sample | Group | BCLC stage (early : 0+A) | Gender | Age (year) | Height (cm) | Weight (kg) | BMI (kg/m <sup>2</sup> ) | Differentiation (well: 1; moderately: 2-3; poorly: 3-4) | AFP (0.0-20.0 ng/mL) | Tumor size (cm) | ALT (U/L) | AST (U/L) | GGT (U/L) | CTP score | TP (64.0-83.0 g/L) | ALB (35.0-55.0 g/L) |
|-----------|--------|-------|--------------------------|--------|------------|-------------|-------------|--------------------------|---------------------------------------------------------|----------------------|-----------------|-----------|-----------|-----------|-----------|--------------------|---------------------|
|           |        |       |                          |        |            |             |             |                          |                                                         |                      |                 |           |           |           |           |                    |                     |
| Discovery | H_20   | H     | M                        |        | 51         | 170         | 74.2        | 26                       |                                                         | 2.1                  |                 | 40        | 29        | 28        |           | 75.1               | 48.7                |
| Discovery | H_N204 | H     | F                        |        | 42         | 161         | 55          | 21                       |                                                         | 1.7                  |                 | 18        | 22        | 13        |           | 77.3               | 45.5                |
| Discovery | H_37   | H     | M                        |        | 51         | 170         | 62.2        | 22                       |                                                         | 2.2                  |                 | 23        | 32        | 6         |           | 74                 | 50.5                |
| Discovery | H_N68  | H     | M                        |        | 53         | 177         | 79.6        | 25                       |                                                         | 3.2                  |                 | 30        | 28        | 15        |           | 71.2               | 50.4                |
| Discovery | H_44   | H     | M                        |        | 43         | 175         | 79          | 26                       |                                                         | 3.1                  |                 | 23        | 21        | 40        |           | 76.8               | 50.5                |
| Discovery | H_N105 | H     | F                        |        | 47         | 163         | 67          | 25                       |                                                         | 3.2                  |                 | 20        | 24        | 34        |           | 76.2               | 49                  |
| Discovery | H_34   | H     | M                        |        | 44         | 182         | 76.6        | 23                       |                                                         | 2.2                  |                 | 16        | 19        | 16        |           | 72.5               | 46.9                |
| Discovery | H_N39  | H     | M                        |        | 39         | 172         | 70          | 24                       |                                                         | 2.8                  |                 | 17        | 27        | 23        |           | 75.2               | 50.1                |
| Discovery | H_52   | H     | M                        |        | 46         | 175         | 76          | 25                       |                                                         | 9                    |                 | 12        | 15        | 19        |           | 69.5               | 49.2                |
| Discovery | H_17   | H     | M                        |        | 55         | 169         | 52.7        | 18                       |                                                         | 2.7                  |                 | 13        | 21        | 47        |           | 70.8               | 43.9                |
| Discovery | H_N50  | H     | M                        |        | 39         | 176         | 79.1        | 26                       |                                                         | 1.8                  |                 | 39        | 19        | 37        |           | 69                 | 47.9                |
| Discovery | H_73   | H     | M                        |        | 43         | 179         | 70.8        | 22                       |                                                         | 3.7                  |                 | 24        | 22        | 14        |           | 75.9               | 53.3                |
| Discovery | H_22   | H     | M                        |        | 55         | 166         | 63.2        | 23                       |                                                         | 2.7                  |                 | 14        | 14        | 12        |           | 70.6               | 47.5                |
| Discovery | H_8    | H     | M                        |        | 48         | 174         | 71.9        | 24                       |                                                         | 13                   |                 | 27        | 25        | 21        |           | 71.9               | 48.3                |
| Discovery | H_71   | H     | F                        |        | 47         | 146         | 60.2        | 28                       |                                                         | 1.6                  |                 | 15        | 15        | 18        |           | 73.9               | 49.1                |
| Discovery | H_N91  | H     | M                        |        | 51         | 175         | 79          | 26                       |                                                         | 3.4                  |                 | 15        | 23        | 17        |           | 72.5               | 48.7                |
| Discovery | H_24   | H     | F                        |        | 49         | 156         | 65.7        | 27                       |                                                         | 5.6                  |                 | 15        | 24        | 14        |           | 74.5               | 48.6                |
| Discovery | H_N76  | H     | M                        |        | 38         | 161         | 61.9        | 24                       |                                                         | 1.9                  |                 | 17        | 21        | 18        |           | 74.2               | 48.4                |
| Discovery | H_54   | H     | M                        |        | 58         | 176         | 67.7        | 22                       |                                                         | 2.2                  |                 | 24        | 21        | 12        |           | 81                 | 50.7                |
| Discovery | H_N181 | H     | F                        |        | 54         | 160         | 65          | 25                       |                                                         | 1.6                  |                 | 18        | 21        | 22        |           | 69.6               | 44.8                |
| Discovery | H_N121 | H     | M                        |        | 60         | 173         | 70          | 23                       |                                                         | 2.4                  |                 | 15        | 18        | 9         |           | 75.5               | 44.8                |
| Discovery | H_15   | H     | M                        |        | 44         | 166         | 70.4        | 26                       |                                                         | 1.8                  |                 | 29        | 21        | 17        |           | 76.5               | 51.4                |
| Discovery | H_46   | H     | M                        |        | 45         | 170         | 72.7        | 25                       |                                                         | 2.2                  |                 | 16        | 19        | 15        |           | 73.3               | 50.6                |
| Discovery | H_N132 | H     | M                        |        | 58         | 169         | 69          | 24                       |                                                         | 3.8                  |                 | 24        | 28        | 19        |           | 70.5               | 42.6                |
| Discovery | H_N260 | H     | M                        |        | 35         | 168         | 53.7        | 19                       |                                                         | 2.7                  |                 | 12        | 20        | 11        |           | 78.3               | 53.3                |
| Discovery | H_70   | H     | M                        |        | 43         | 175         | 62.2        | 20                       |                                                         | 5.1                  |                 | 16        | 22        | 22        |           | 70.5               | 47                  |
| Discovery | H_27   | H     | M                        |        | 60         | 170         | 67          | 23                       |                                                         | 2.4                  |                 | 15        | 19        | 9         |           | 75.5               | 44.8                |
| Discovery | H_N57  | H     | M                        |        | 55         | 169         | 52.7        | 18                       |                                                         | 2.7                  |                 | 13        | 21        | 47        |           | 70.8               | 43.9                |
| Discovery | H_N72  | H     | M                        |        | 41         | 168         | 60.6        | 21                       |                                                         | 1.4                  |                 | 14        | 24        | 18        |           | 76.8               | 52.5                |
| Discovery | H_77   | H     | M                        |        | 43         | 166         | 66          | 24                       |                                                         | 6.4                  |                 | 14        | 23        | 30        |           | 75.6               | 49.3                |
| Discovery | H_N197 | H     | M                        |        | 57         | 168         | 68.8        | 24                       |                                                         | 3.4                  |                 | 25        | 23        | 51        |           | 72.5               | 47.2                |
| Discovery | H_6    | H     | M                        |        | 44         | 176         | 61.6        | 20                       |                                                         | 1.9                  |                 | 41        | 40        | 27        |           | 75.2               | 50.4                |
| Discovery | H_N55  | H     | F                        |        | 50         | 159         | 55.7        | 22                       |                                                         | 6.6                  |                 | 12        | 18        | 7         |           | 70.8               | 47.5                |
| Discovery | H_64   | H     | M                        |        | 48         | 185         | 76.2        | 22                       |                                                         | 4.4                  |                 | 22        | 30        | 17        |           | 70.3               | 45                  |
| Discovery | H_63   | H     | F                        |        | 51         | 159         | 55          | 22                       |                                                         | 2.1                  |                 | 15        | 21        | 17        |           | 72.2               | 44.4                |
| Discovery | H_53   | H     | M                        |        | 57         | 177         | 79.6        | 25                       |                                                         | 4.1                  |                 | 33        | 27        | 29        |           | 76.7               | 50.5                |
| Discovery | H_5    | H     | F                        |        | 52         | 158         | 60          | 24                       |                                                         | 1.1                  |                 | 28        | 25        | 44        |           | 74.7               | 48.7                |
| Discovery | H_N264 | H     | M                        |        | 53         | 172         | 63.4        | 21                       |                                                         | 2.9                  |                 | 13        | 18        | 14        |           | 69.9               | 45.8                |
| Discovery | H_N102 | H     | F                        |        | 43         | 163         | 52.8        | 20                       |                                                         | 2.6                  |                 | 13        | 18        | 11        |           | 75.4               | 49                  |
| Discovery | H_76   | H     | M                        |        | 43         | 171         | 56.9        | 19                       |                                                         | 4.4                  |                 | 33        | 25        | 13        |           | 68.5               | 48.2                |
| Discovery | H_40   | H     | M                        |        | 48         | 173         | 70          | 23                       |                                                         | 3.3                  |                 | 38        | 31        | 19        |           | 80.9               | 52                  |
| Discovery | H_N145 | H     | F                        |        | 43         | 159         | 51.7        | 21                       |                                                         | 1.6                  |                 | 24        | 23        | 14        |           | 75.2               | 46.9                |
| Discovery | H_N258 | H     | M                        |        | 34         | 176         | 70          | 23                       |                                                         | 3.3                  |                 | 40        | 21        | 22        |           | 74.3               | 50.3                |
| Discovery | H_14   | H     | M                        |        | 42         | 171         | 61          | 21                       |                                                         | 3.1                  |                 | 18        | 17        | 12        |           | 83                 | 52.9                |

|           |        |       |     |    |     |      |    |                  |    |    |       |      |      |
|-----------|--------|-------|-----|----|-----|------|----|------------------|----|----|-------|------|------|
| Discovery | H_13   | H     | M   | 44 | 176 | 75   | 24 | 2.7              | 21 | 25 | 27    | 76   | 48   |
| Discovery | H_55   | H     | M   | 51 | 175 | 61   | 20 | 3.4              | 15 | 23 | 17    | 72.5 | 48.7 |
| Discovery | H_25   | H     | M   | 58 | 168 | 62.8 | 22 | 4.5              | 19 | 23 | 16    | 72.7 | 46.7 |
| Discovery | H_N109 | H     | F   | 49 | 156 | 60.7 | 25 | 2.5              | 15 | 24 | 14    | 74.5 | 48.6 |
| Discovery | H_61   | H     | F   | 43 | 165 | 58   | 21 | 2.6              | 8  | 20 | 14    | 70.7 | 43   |
| Discovery | H_28   | H     | M   | 59 | 175 | 75   | 24 | 2.5              | 15 | 15 | 37    | 78.6 | 47.9 |
| Discovery | H_N177 | H     | M   | 41 | 173 | 74.3 | 25 | 2.1              | 22 | 21 | 20    | 77.8 | 51.6 |
| Discovery | H_9    | H     | F   | 54 | 157 | 45.3 | 18 | 2.3              | 25 | 24 | 75    | 75.5 | 49.5 |
| Discovery | H_33   | H     | M   | 50 | 165 | 70   | 26 | 1.8              | 21 | 21 | 37    | 72.8 | 46.8 |
| Discovery | H_26   | H     | F   | 52 | 155 | 60   | 25 | 1.6              | 26 | 29 | 68    | 73.4 | 47.9 |
| Discovery | H_N40  | H     | F   | 48 | 160 | 55.9 | 22 | 1.2              | 10 | 14 | 9     | 75   | 46.6 |
| Discovery | H_N121 | H     | M   | 60 | 171 | 69   | 24 | 2.4              | 15 | 17 | 9     | 75.5 | 44.8 |
| Discovery | H_23   | H     | M   | 47 | 168 | 68   | 24 | 3.4              | 30 | 24 | 18    | 78.3 | 50.2 |
| Discovery | H_N56  | H     | M   | 52 | 164 | 51.3 | 19 | 2                | 23 | 22 | 25    | 75.5 | 52.8 |
| Discovery | H_N164 | H     | M   | 41 | 178 | 80   | 25 | 2                | 10 | 18 | 31    | 75.9 | 50.7 |
| Discovery | H_12   | H     | M   | 49 | 172 | 71.1 | 24 | 2.2              | 18 | 19 | 13    | 75   | 51   |
| Discovery | H_N75  | H     | M   | 41 | 177 | 82.2 | 26 | 2.1              | 18 | 18 | 28    | 75   | 51.9 |
| Discovery | H_47   | H     | M   | 42 | 171 | 61   | 21 | 2.5              | 18 | 17 | 12    | 83   | 52.9 |
| Discovery | H_N84  | H     | M   | 57 | 177 | 79.6 | 25 | 4.1              | 33 | 27 | 29    | 76.7 | 50.5 |
| Discovery | H_42   | H     | M   | 43 | 166 | 54.8 | 20 | 2.8              | 14 | 17 | 23    | 83.9 | 51.9 |
| Discovery | H_N9   | H     | F   | 58 | 158 | 61   | 24 | 3                | 20 | 24 | 20    | 73.6 | 45.8 |
| Discovery | H_N52  | H     | F   | 52 | 159 | 61   | 24 | 3.3              | 15 | 19 | 14    | 71.9 | 51   |
| Discovery | H_62   | H     | F   | 47 | 160 | 60   | 23 | 4                | 34 | 36 | 13    | 71   | 44.8 |
| Discovery | H_1    | H     | F   | 58 | 160 | 60   | 23 | 3                | 20 | 21 | 20    | 73.6 | 45.8 |
| Discovery | H_N111 | H     | M   | 58 | 168 | 62.8 | 22 | 4.5              | 19 | 23 | 16    | 72.7 | 46.7 |
| Discovery | H_N54  | H     | M   | 43 | 174 | 75   | 25 | 1.9              | 74 | 38 | 64    | 77.7 | 48.9 |
| Discovery | H_N102 | H     | F   | 43 | 163 | 52.8 | 20 | 2.6              | 13 | 18 | 11    | 75.4 | 49   |
| Discovery | H_4    | H     | F   | 56 | 157 | 48.1 | 20 | 6                | 10 | 12 | 15    | 69.5 | 48.5 |
| Discovery | H_36   | H     | M   | 57 | 168 | 68.8 | 24 | 3.4              | 25 | 23 | 51    | 72.5 | 47.2 |
| Discovery | H_16   | H     | M   | 52 | 164 | 51.3 | 19 | 1.5              | 23 | 22 | 25    | 75.5 | 52.8 |
| Discovery | H_69   | H     | M   | 42 | 180 | 79.3 | 24 | 2.7              | 16 | 24 | 13    | 74.3 | 46.6 |
| Discovery | C_82   | HCC A | F   | 59 | 159 | 61   | 24 | 2 2.3 5.0×4.5×4  | 56 | 60 | 47 A  | 60.9 | 41.5 |
| Discovery | C_62   | HCC   | 0 M | 52 | 175 | 76.5 | 25 | 2 272 2×2×1.7    | 40 | 31 | 67 A  | 70.1 | 36.1 |
| Discovery | C_60   | HCC A | M   | 51 | 174 | 70   | 23 | 1 5.1 2.5×2; 1×0 | 25 | 26 | 56 A  | 75.1 | 28.1 |
| Discovery | C_32   | HCC   | 0 M | 47 | 163 | 60.5 | 23 | 3 383 2.0×1.9    | 45 | 51 | 227 A | 71.2 | 40.6 |
| Discovery | C_HCC  | HCC A | M   | 58 | 182 | 85   | 26 | 2 7.2 4.7×4.6    | 28 | 18 | 80 A  | 64.8 | 38.2 |
| Discovery | C_11   | HCC   | 0 F | 45 | 160 | 54   | 21 | 3 266 1.8×1.7    | 7  | 13 | 12 A  | 73.6 | 44.2 |
| Discovery | C_75   | HCC   | 0 M | 41 | 168 | 66.5 | 24 | 3 8.3 2×2        | 33 | 35 | 92 A  | 74   | 46   |
| Discovery | C_61   | HCC   | 0 M | 53 | 168 | 68   | 24 | 1 1.5 2.0×1.7    | 46 | 80 | 21 A  | 67.6 | 37.3 |
| Discovery | C_88   | HCC   | 0 M | 51 | 167 | 60   | 22 | 1 2.9 1.9×1.6    | 21 | 39 | 58 A  | 68.9 | 36.7 |
| Discovery | C_18   | HCC A | M   | 43 | 175 | 70   | 23 | 2 3.4 3.1×2.2×2. | 22 | 25 | 25 A  | 67.5 | 41.7 |
| Discovery | C_HCC  | HCC A | M   | 51 | 165 | 67   | 25 | 4 ### 2.9×2.6    | 34 | 44 | 54 A  | 58.1 | 28.3 |
| Discovery | C_HCC  | HCC   | 0 M | 58 | 174 | 75   | 25 | 1 1.3 1.9×1.3×1. | 12 | 14 | 12 A  | 60.5 | 39.2 |
| Discovery | C_94   | HCC A | F   | 44 | 160 | 55   | 21 | 1 4.5 2.8×2.7    | 23 | 42 | 89 A  | 70.5 | 43   |
| Discovery | C_36   | HCC A | M   | 39 | 175 | 70   | 23 | 2 37 3.2×2.8     | 26 | 27 | 41 A  | 78.6 | 47.3 |
| Discovery | C_HCC  | HCC A | M   | 46 | 168 | 60   | 21 | 2 260 3×2        | 59 | 52 | 92 A  | 63.8 | 36   |
| Discovery | C_12   | HCC A | M   | 59 | 163 | 66.9 | 25 | 4 ### 3.5×3.5    | 54 | 61 | 41 A  | 60.6 | 30.2 |
| Discovery | C_101  | HCC   | 0 M | 49 | 170 | 66   | 23 | 2 13 1.9×1.7     | 18 | 25 | 27 A  | 55.5 | 31.4 |
| Discovery | C_86   | HCC A | M   | 45 | 176 | 76   | 25 | 2 10 3.2×2.2     | 95 | 64 | 172 A | 64.8 | 38   |
| Discovery | C_106  | HCC A | F   | 58 | 155 | 44.5 | 19 | 3 459 2.7×2.6; 1 | 21 | 35 | 40 A  | 62.8 | 35.7 |
| Discovery | C_HCC  | HCC   | 0 F | 50 | 156 | 48   | 20 | 2 5.6 1×1        | 17 | 28 | 63 A  | 67.3 | 42   |
| Discovery | C_54   | HCC A | M   | 52 | 165 | 57.5 | 21 | 4 38 2.5×2×3     | 18 | 22 | 18 A  | 61.2 | 39.2 |
| Discovery | C_69   | HCC   | 0 M | 21 | 180 | 79   | 24 | 2 282 2×1        | 33 | 19 | 35 A  | 77.6 | 45.3 |
| Discovery | C_85   | HCC A | M   | 23 | 170 | 70   | 24 | 2 ### 3.0×2.6    | 31 | 23 | 38 A  | 65.3 | 42.2 |

|           |        |       |     |    |     |      |    |   |     |             |     |     |       |      |      |
|-----------|--------|-------|-----|----|-----|------|----|---|-----|-------------|-----|-----|-------|------|------|
| Discovery | C_73   | HCC A | M   | 48 | 181 | 80.5 | 25 | 3 | 456 | 2.5×2.3     | 51  | 36  | 34 A  | 64.6 | 37.7 |
| Discovery | C_64   | HCC A | M   | 58 | 162 | 60   | 23 | 3 | 123 | 5×4×4       | 46  | 46  | 213 A | 74.8 | 37.9 |
| Discovery | C_HCC: | HCC A | F   | 57 | 157 | 58   | 24 | 1 | 2.6 | 4.4×3.8     | 27  | 49  | 23 A  | 70.3 | 29.3 |
| Discovery | C_HCC: | HCC A | F   | 59 | 160 | 62   | 24 | 3 | 3.6 | 5×2.8×1.8   | 40  | 38  | 45 A  | 74   | 42.1 |
| Discovery | C_28   | HCC A | M   | 44 | 160 | 59   | 23 | 3 | ### | 4.5×3.2×2.  | 43  | 43  | 80 A  | 59.7 | 35.6 |
| Discovery | C_46   | HCC   | 0 M | 43 | 168 | 58   | 21 | 1 | 15  | 1.5×1.2     | 22  | 21  | 28 A  | 69.7 | 42.3 |
| Discovery | C_HCC: | HCC A | F   | 45 | 165 | 62   | 23 | 3 | 3.1 | 3.4×3.5     | 24  | 41  | 21 A  | 67.5 | 40.1 |
| Discovery | C_89   | HCC   | 0 M | 53 | 169 | 64   | 22 | 2 | 3.2 | 1.9×1.6     | 27  | 28  | 101 A | 60.6 | 36.8 |
| Discovery | C_14   | HCC   | 0 F | 55 | 154 | 46   | 19 | 3 | 139 | 2×1.8×1.4   | 22  | 23  | 16 A  | 65.2 | 43.3 |
| Discovery | C_20   | HCC A | M   | 57 | 166 | 62   | 22 | 4 | 35  | 3.1×2.5     | 30  | 24  | 20 A  | 70.6 | 38.2 |
| Discovery | C_90   | HCC A | M   | 51 | 171 | 66   | 23 | 1 | 4.7 | 3.6×3.3     | 32  | 33  | 98 A  | 62   | 38.6 |
| Discovery | C_HCC: | HCC   | 0 M | 60 | 160 | 64   | 25 | 2 | 50  | 2×1.8       | 20  | 34  | 138 A | 73.4 | 44   |
| Discovery | C_19   | HCC A | M   | 36 | 170 | 65.5 | 23 | 2 | ### | 2.5×2.5; 1. | 31  | 25  | 200 A | 66.6 | 35.2 |
| Discovery | C_7    | HCC A | M   | 45 | 177 | 64   | 20 | 4 | ### | 4×3         | 16  | 25  | 26 A  | 74.1 | 46.1 |
| Discovery | C_HCC: | HCC A | M   | 59 | 167 | 55   | 20 | 2 | 274 | 1.5×1; 1×1  | 23  | 27  | 22 A  | 74.2 | 46.9 |
| Discovery | C_HCC: | HCC A | M   | 54 | 175 | 53   | 17 | 1 | 1.7 | 2.2×2.1; 1. | 23  | 27  | 79 A  | 76.7 | 48.4 |
| Discovery | C_HCC: | HCC   | 0 M | 35 | 170 | 68   | 24 | 2 | 842 | 1.5×1×1.8   | 36  | 23  | 69 A  | 67   | 40.9 |
| Discovery | C_HCC: | HCC A | M   | 48 | 163 | 55   | 21 | 1 | 2.6 | 2.5×2.2     | 42  | 42  | 150 A | 64.4 | 33.3 |
| Discovery | C_102  | HCC A | M   | 48 | 182 | 75   | 23 | 1 | 7   | 4.5×4.2     | 23  | 25  | 60 A  | 61.8 | 35.2 |
| Discovery | C_13   | HCC A | F   | 42 | 162 | 77   | 29 | 2 | 105 | 4.2×2.0×2.  | 37  | 55  | 56 B  | 63.4 | 27.3 |
| Discovery | C_83   | HCC A | M   | 43 | 170 | 65   | 22 | 3 | 776 | 3×2.5       | 16  | 16  | 20 A  | 73.8 | 44.3 |
| Discovery | C_74   | HCC A | M   | 29 | 175 | 75   | 24 | 2 | 147 | 4.3×3.4     | 301 | 158 | 61 A  | 69.8 | 40.9 |
| Discovery | C_38   | HCC A | M   | 56 | 165 | 53   | 19 | 3 | ### | 3×4         | 152 | 151 | 27 A  | 74.5 | 34.5 |
| Discovery | C_109  | HCC   | 0 M | 56 | 163 | 61   | 23 | 1 | 1.7 | 1.6×1.3     | 16  | 24  | 30 A  | 65.8 | 35.2 |
| Discovery | C_49   | HCC A | M   | 57 | 178 | 73.5 | 23 | 2 | 4.9 | 5.0×4×3.5   | 14  | 25  | 20 A  | 65.2 | 40   |
| Discovery | C_47   | HCC A | M   | 56 | 168 | 56   | 20 | 2 | 165 | 3.9×2.2     | 108 | 102 | 27 A  | 64.2 | 41.7 |
| Discovery | C_39   | HCC   | 0 M | 43 | 165 | 60   | 22 | 3 | 530 | 1.6×1.6     | 27  | 26  | 18 A  | 65.4 | 36.9 |
| Discovery | C_44   | HCC A | F   | 57 | 154 | 54   | 23 | 2 | 261 | 3×2.4       | 99  | 51  | 123 A | 70.5 | 43.8 |
| Discovery | C_34   | HCC A | M   | 43 | 175 | 77   | 25 | 3 | 5.4 | 2.5×2×1.2   | 37  | 24  | 181 A | 70.5 | 41.7 |
| Discovery | C_24   | HCC A | M   | 58 | 168 | 63.5 | 22 | 1 | 2.8 | 4.1×3.6     | 192 | 177 | 140 A | 68.3 | 42.8 |
| Discovery | C_10   | HCC A | M   | 37 | 177 | 71   | 23 | 2 | 3.4 | 4×3×3       | 24  | 19  | 28 A  | 71.8 | 47.3 |
| Discovery | C_6    | HCC A | F   | 56 | 160 | 58   | 23 | 2 | 106 | 5×5         | 24  | 27  | 32 A  | 64.4 | 35.5 |
| Discovery | C_58   | HCC A | M   | 58 | 173 | 70   | 23 | 1 | 1.7 | 3.9×3.6     | 22  | 24  | 21 A  | 64.7 | 39.9 |
| Discovery | C_53   | HCC A | M   | 53 | 175 | 79   | 26 | 3 | 2.2 | 3.5×3       | 314 | 248 | 20 A  | 55.5 | 32   |
| Discovery | C_68   | HCC   | 0 M | 55 | 170 | 65   | 22 | 1 | 1.6 | 1.9×1.7     | 34  | 37  | 26 A  | 54.5 | 30.4 |
| Discovery | C_23   | HCC A | M   | 56 | 165 | 71   | 26 | 2 | 9.8 | 2.9×2.7     | 39  | 73  | 71 A  | 57.3 | 28   |
| Discovery | C_81   | HCC A | M   | 58 | 170 | 70   | 24 | 3 | 611 | 2.3×1.8     | 16  | 15  | 15 A  | 62   | 36.4 |
| Discovery | C_51   | HCC   | 0 F | 50 | 174 | 62   | 20 | 1 | 4.3 | 1.5×1×0.5   | 16  | 64  | 40 A  | 66.6 | 40.8 |
| Discovery | C_HCC: | HCC   | 0 M | 49 | 167 | 69   | 25 | 1 | 3.7 | 1.6×1.2     | 111 | 51  | 54 A  | 71.1 | 40.5 |
| Discovery | C_95   | HCC A | M   | 58 | 170 | 59.5 | 21 | 2 | 4   | 2.7×2.4     | 18  | 26  | 14 A  | 62.9 | 37.6 |
| Discovery | C_HCC: | HCC   | 0 M | 51 | 167 | 55   | 20 | 1 | 1.9 | 1.9×1.7     | 20  | 40  | 61 A  | 70.9 | 37.7 |
| Discovery | C_HCC: | HCC A | M   | 57 | 175 | 75   | 24 | 1 | 7.5 | 3.2×2.5     | 29  | 30  | 58 A  | 61.2 | 32.9 |
| Discovery | C_27   | HCC A | M   | 50 | 181 | 62.5 | 19 | 3 | 14  | 5cm         | 24  | 25  | 29 A  | 56.4 | 35.8 |
| Discovery | C_HCC: | HCC A | M   | 55 | 168 | 69   | 24 | 2 | 93  | 3.9×3.2     | 32  | 33  | 80 A  | 76   | 42.1 |
| Discovery | C_77   | HCC A | F   | 57 | 163 | 66   | 25 | 1 | 5.2 | 2.5×1.7     | 36  | 45  | 36 A  | 68.4 | 34.9 |
| Discovery | C_63   | HCC A | M   | 47 | 171 | 72.5 | 25 | 1 | 4.5 | 3.0×2.1     | 39  | 26  | 37 A  | 75.4 | 34.6 |
| Discovery | C_105  | HCC A | M   | 46 | 168 | 60   | 21 | 3 | ### | 5.0×3.7     | 70  | 53  | 31 A  | 64.3 | 38.2 |
| Discovery | C_91   | HCC A | M   | 34 | 165 | 58   | 21 | 2 | 4.7 | 3×3         | 56  | 57  | 52 A  | 75.5 | 45.5 |
| Discovery | C_29   | HCC A | M   | 60 | 168 | 65   | 23 | 2 | 21  | 2.3×2.0     | 18  | 30  | 44 A  | 70.4 | 36.7 |
| Discovery | C_HCC: | HCC A | M   | 51 | 172 | 66   | 22 | 1 | 4.6 | 3.6×3.5     | 33  | 30  | 128 A | 65   | 40.6 |
| Discovery | C_22   | HCC   | 0 F | 58 | 159 | 57   | 23 | 2 | 25  | 1.9×1.3     | 26  | 29  | 25 A  | 66.5 | 37.7 |
| Discovery | C_41   | HCC A | M   | 39 | 170 | 71   | 25 | 2 | ### | 4×3×2.5     | 23  | 20  | 36 A  | 71.2 | 47.7 |
| Discovery | ELC_31 | ELC   | F   | 50 | 158 | 56.6 | 23 |   | 5.5 |             | 46  | 41  | 14 A  | 75   | 52   |
| Discovery | ELC_19 | ELC   | M   | 53 | 165 | 59   | 22 |   | 1.3 |             | 38  | 35  | 19 A  | 71   | 50   |

|            |        |     |   |    |     |      |    |     |    |    |    |   |      |      |
|------------|--------|-----|---|----|-----|------|----|-----|----|----|----|---|------|------|
| Discovery  | ELC_44 | ELC | M | 48 | 175 | 70   | 23 | 2.3 | 28 | 19 | 7  | A | 75.7 | 46.9 |
| Discovery  | ELC_56 | ELC | F | 50 | 160 | 61   | 24 | 14  | 16 | 26 | 41 | A | 73.8 | 46   |
| Discovery  | ELC_63 | ELC | M | 43 | 169 | 65   | 23 | 4.3 | 42 | 47 | 12 | A | 73.3 | 46.6 |
| Discovery  | ELC_47 | ELC | M | 40 | 159 | 50   | 20 | 4.9 | 25 | 29 | 17 | A | 73.4 | 46   |
| Discovery  | ELC_20 | ELC | M | 60 | 173 | 70   | 23 | 4.2 | 22 | 28 | 20 | A | 71   | 48   |
| Discovery  | ELC_43 | ELC | M | 46 | 173 | 69   | 23 | 4.9 | 28 | 38 | 64 | A | 70   | 45   |
| Discovery  | ELC_13 | ELC | M | 47 | 175 | 65.2 | 21 | 34  | 35 | 21 | 58 | A | 75.3 | 46   |
| Discovery  | ELC_33 | ELC | F | 54 | 164 | 51.9 | 19 | 8.7 | 26 | 39 | 11 | A | 71.6 | 44.8 |
| Discovery  | ELC_40 | ELC | M | 43 | 176 | 67.1 | 22 | 40  | 42 | 47 | 49 | A | 70.6 | 48.5 |
| Discovery  | ELC_22 | ELC | M | 54 | 172 | 65.9 | 22 | 2.7 | 38 | 45 | 28 | A | 81.8 | 50.5 |
| Discovery  | ELC_18 | ELC | M | 33 | 172 | 63.7 | 22 | 7.8 | 24 | 25 | 29 | A | 72.9 | 49   |
| Discovery  | ELC_61 | ELC | M | 46 | 170 | 58   | 20 | 11  | 49 | 33 | 64 | A | 76.3 | 44.5 |
| Discovery  | ELC_24 | ELC | M | 52 | 175 | 71.9 | 23 | 6.9 | 19 | 19 | 28 | A | 74.7 | 51.2 |
| Discovery  | ELC_29 | ELC | M | 49 | 176 | 70.8 | 23 | 2.6 | 25 | 23 | 13 | A | 71.8 | 45   |
| Discovery  | ELC_42 | ELC | F | 52 | 168 | 62   | 22 | 1.1 | 25 | 29 | 14 | A | 73.5 | 47.7 |
| Discovery  | ELC_17 | ELC | F | 39 | 164 | 55.6 | 21 | 23  | 21 | 20 | 28 | A | 74.7 | 50   |
| Discovery  | ELC_38 | ELC | M | 40 | 175 | 72.8 | 24 | 2.2 | 34 | 28 | 14 | A | 307  | 48.6 |
| Discovery  | ELC_7A | ELC | F | 47 | 158 | 58   | 23 | 32  | 22 | 31 | 54 | A | 70.5 | 48.2 |
| Discovery  | ELC_58 | ELC | M | 40 | 172 | 68   | 23 | 6.8 | 34 | 28 | 46 | A | 78.9 | 44.7 |
| Discovery  | ELC_46 | ELC | M | 47 | 169 | 67   | 23 | 4.5 | 40 | 35 | 12 | A | 78.9 | 51   |
| Discovery  | ELC_25 | ELC | M | 51 | 176 | 70.2 | 23 | 5.3 | 33 | 22 | 22 | A | 76.5 | 50   |
| Discovery  | ELC_51 | ELC | M | 48 | 180 | 77   | 24 | 1.8 | 12 | 16 | 12 | A | 70.2 | 46.9 |
| Discovery  | ELC_11 | ELC | M | 54 | 172 | 71   | 24 | 42  | 19 | 19 | 42 | A | 67.8 | 41.9 |
| Discovery  | ELC_21 | ELC | M | 37 | 182 | 76.2 | 23 | 3.8 | 29 | 30 | 17 | A | 73   | 50   |
| Discovery  | ELC_28 | ELC | M | 40 | 176 | 65   | 21 | 7.7 | 30 | 28 | 51 | A | 69.7 | 49.2 |
| Discovery  | ELC_37 | ELC | F | 50 | 163 | 51.8 | 19 | 3.9 | 16 | 26 | 12 | A | 78.5 | 52.4 |
| Discovery  | ELC_11 | ELC | M | 37 | 165 | 58   | 21 | 28  | 21 | 20 | 37 | A | 74.7 | 52.2 |
| Discovery  | ELC_48 | ELC | M | 47 | 159 | 52   | 21 | 2.8 | 28 | 38 | 14 | A | 75.3 | 51.6 |
| Discovery  | ELC_45 | ELC | M | 52 | 178 | 75   | 24 | 3.2 | 18 | 28 | 25 | A | 70.5 | 46.2 |
| Discovery  | ELC_23 | ELC | F | 45 | 156 | 55   | 23 | 1.2 | 45 | 29 | 20 | A | 75.5 | 51.5 |
| Discovery  | ELC_41 | ELC | M | 49 | 163 | 65   | 24 | 3.9 | 14 | 30 | 37 | A | 80.6 | 48.9 |
| Discovery  | ELC_35 | ELC | M | 48 | 168 | 65.3 | 23 | 9.4 | 38 | 35 | 25 | A | 71.2 | 47.2 |
| Discovery  | ELC_8A | ELC | M | 45 | 172 | 66   | 22 | 40  | 48 | 22 | 71 | A | 74.6 | 48.3 |
| Discovery  | ELC_65 | ELC | M | 48 | 170 | 68   | 24 | 22  | 43 | 34 | 25 | A | 71.3 | 47.8 |
| Discovery  | ELC_52 | ELC | F | 53 | 158 | 56   | 22 | 1.8 | 42 | 37 | 26 | A | 76   | 49   |
| Discovery  | ELC_11 | ELC | M | 47 | 173 | 61   | 20 | 1.5 | 55 | 38 | 12 | A | 66   | 43   |
| Discovery  | ELC_36 | ELC | M | 45 | 169 | 71.3 | 25 | 25  | 37 | 70 | 48 | A | 83.9 | 51.9 |
| Discovery  | ELC_30 | ELC | M | 49 | 169 | 61.3 | 22 | 56  | 38 | 35 | 72 | A | 70.5 | 47.7 |
| Validation | H_48   | H   | M | 52 | 169 | 75   | 26 | 3.3 | 15 | 19 | 14 |   | 71.9 | 51   |
| Validation | H_N69  | H   | F | 46 | 156 | 50.2 | 21 | 1.9 | 11 | 14 | 12 |   | 74.5 | 49.9 |
| Validation | H_N5   | H   | M | 41 | 176 | 80.5 | 26 | 3.2 | 40 | 38 | 19 |   | 74.2 | 48.2 |
| Validation | H_57   | H   | M | 47 | 165 | 55   | 20 | 3.2 | 20 | 19 | 34 |   | 76.2 | 49   |
| Validation | H_49   | H   | M | 50 | 159 | 55.7 | 22 | 6.6 | 12 | 18 | 7  |   | 70.8 | 47.5 |
| Validation | H_43   | H   | F | 44 | 157 | 63.4 | 26 | 5.3 | 17 | 15 | 16 |   | 77.2 | 49.5 |
| Validation | H_45   | H   | M | 48 | 160 | 55.9 | 22 | 1.2 | 10 | 14 | 9  |   | 75   | 46.6 |
| Validation | H_N16  | H   | F | 49 | 159 | 47   | 19 | 1.8 | 24 | 24 | 16 |   | 76   | 52.8 |
| Validation | H_30   | H   | M | 61 | 172 | 69.5 | 23 | 1.7 | 19 | 25 | 37 |   | 69   | 45   |
| Validation | H_74   | H   | M | 43 | 165 | 61.3 | 23 | 5.8 | 11 | 17 | 7  |   | 73.1 | 46.6 |
| Validation | H_50   | H   | M | 47 | 169 | 69.5 | 24 | 1.6 | 28 | 19 | 27 |   | 66.2 | 46.9 |
| Validation | H_75   | H   | F | 47 | 159 | 56.6 | 22 | 6.1 | 18 | 24 | 10 |   | 73   | 45.3 |
| Validation | H_35   | H   | M | 54 | 170 | 69   | 24 | 5.4 | 23 | 21 | 19 |   | 75.7 | 45.9 |
| Validation | H_N64  | H   | M | 45 | 184 | 84.4 | 25 | 2.6 | 36 | 23 | 32 |   | 76   | 50.3 |
| Validation | H_N7   | H   | M | 37 | 176 | 71.5 | 23 | 2.6 | 34 | 32 | 37 |   | 75.1 | 51.1 |



|            |        |       |     |    |     |      |    |                  |    |     |       |      |      |
|------------|--------|-------|-----|----|-----|------|----|------------------|----|-----|-------|------|------|
| Validation | H_60   | H     | F   | 43 | 159 | 51.7 | 21 | 1.6              | 24 | 27  | 14    | 75.2 | 46.9 |
| Validation | H_2    | H     | M   | 51 | 171 | 60.4 | 21 | 3                | 13 | 15  | 16    | 79.3 | 53.4 |
| Validation | H_68   | H     | M   | 43 | 176 | 76   | 25 | 1.7              | 19 | 19  | 23    | 78.9 | 50.2 |
| Validation | H_N259 | H     | M   | 53 | 172 | 63.4 | 21 | 3.9              | 13 | 18  | 14    | 69.9 | 45.8 |
| Validation | H_10   | H     | M   | 47 | 171 | 71.6 | 25 | 2.2              | 26 | 28  | 28    | 71.2 | 48.2 |
| Validation | H_N261 | H     | M   | 40 | 175 | 64.7 | 21 | 2.2              | 23 | 27  | 25    | 84.8 | 55.2 |
| Validation | H_39   | H     | F   | 59 | 162 | 55.4 | 21 | 4.4              | 28 | 20  | 14    | 74.7 | 48.7 |
| Validation | H_56   | H     | F   | 43 | 163 | 52.8 | 20 | 2.3              | 13 | 18  | 11    | 75.4 | 49   |
| Validation | H_N171 | H     | M   | 44 | 183 | 77   | 23 | 2                | 33 | 23  | 21    | 71.5 | 46.5 |
| Validation | H_N58  | H     | M   | 36 | 176 | 75   | 24 | 2                | 21 | 28  | 12    | 78.9 | 50.9 |
| Validation | H_18   | H     | F   | 52 | 158 | 59   | 24 | 3.5              | 25 | 29  | 14    | 75.5 | 49.6 |
| Validation | H_N49  | H     | M   | 36 | 173 | 73.3 | 25 | 1.9              | 26 | 27  | 14    | 79.2 | 49.6 |
| Validation | H_38   | H     | M   | 57 | 175 | 67   | 22 | 1.4              | 22 | 21  | 24    | 71   | 48.2 |
| Validation | H_N160 | H     | M   | 61 | 172 | 69.5 | 23 | 1.7              | 19 | 23  | 37    | 69   | 45   |
| Validation | H_29   | H     | M   | 57 | 179 | 77.8 | 24 | 3.1              | 19 | 23  | 22    | 73.5 | 48.7 |
| Validation | H_66   | H     | F   | 51 | 162 | 50.8 | 19 | 3.1              | 12 | 16  | 18    | 75.9 | 44.7 |
| Validation | H_19   | H     | M   | 53 | 177 | 79.6 | 25 | 3.2              | 30 | 29  | 15    | 71.2 | 50.4 |
| Validation | H_N86  | H     | M   | 46 | 169 | 68   | 24 | 9                | 12 | 15  | 19    | 69.5 | 49.2 |
| Validation | H_N21  | H     | M   | 56 | 169 | 72   | 25 | 2.7              | 21 | 25  | 18    | 74.7 | 50.2 |
| Validation | H_51   | H     | M   | 45 | 184 | 84.4 | 25 | 2.6              | 36 | 23  | 32    | 76   | 50.3 |
| Validation | H_67   | H     | F   | 42 | 163 | 60   | 23 | 1.7              | 18 | 22  | 13    | 77.3 | 45.5 |
| Validation | H_N63  | H     | M   | 47 | 169 | 69.5 | 24 | 1.5              | 28 | 19  | 27    | 66.2 | 46.9 |
| Validation | H_7    | H     | M   | 48 | 174 | 71.9 | 24 | 13               | 27 | 29  | 21    | 71.9 | 48.3 |
| Validation | H_72   | H     | F   | 43 | 162 | 55   | 21 | 1.8              | 20 | 22  | 11    | 76.3 | 49.3 |
| Validation | H_N176 | H     | F   | 51 | 159 | 55   | 22 | 3.1              | 15 | 21  | 27    | 72.2 | 44.4 |
| Validation | H_32   | H     | M   | 42 | 180 | 75   | 23 | 2                | 21 | 23  | 8     | 78.5 | 50.3 |
| Validation | H_N70  | H     | M   | 58 | 176 | 67.7 | 22 | 2.2              | 24 | 21  | 12    | 81   | 50.7 |
| Validation | H_59   | H     | F   | 49 | 165 | 55.2 | 20 | 3.8              | 15 | 17  | 13    | 73.7 | 47.2 |
| Validation | H_N47  | H     | M   | 42 | 171 | 61   | 21 | 3.1              | 18 | 17  | 12    | 83   | 52.9 |
| Validation | H_58   | H     | M   | 59 | 172 | 70   | 24 | 2.6              | 23 | 25  | 31    | 71   | 43.5 |
| Validation | H_N65  | H     | F   | 52 | 160 | 59   | 23 | 3.5              | 25 | 24  | 14    | 75.5 | 49.6 |
| Validation | H_31   | H     | M   | 56 | 172 | 69   | 23 | 3.4              | 28 | 26  | 37    | 72.9 | 44.9 |
| Validation | H_11   | H     | F   | 48 | 160 | 55.9 | 22 | 0.9              | 10 | 14  | 9     | 75   | 46.6 |
| Validation | H_21   | H     | M   | 59 | 177 | 78   | 25 | 4.2              | 18 | 25  | 23    | 73.5 | 48.7 |
| Validation | H_N97  | H     | M   | 41 | 177 | 82.2 | 26 | 2.3              | 18 | 21  | 28    | 75   | 51.9 |
| Validation | H_65   | H     | F   | 44 | 164 | 60.9 | 23 | 1.5              | 11 | 17  | 7     | 77.6 | 44.3 |
| Validation | H_N101 | H     | M   | 36 | 169 | 71.3 | 25 | 5                | 15 | 19  | 15    | 77.3 | 51   |
| Validation | H_41   | H     | M   | 50 | 169 | 66.7 | 23 | 3.6              | 12 | 12  | 15    | 73.6 | 48.2 |
| Validation | H_3    | H     | M   | 56 | 178 | 75   | 24 | 2.7              | 21 | 27  | 18    | 74.7 | 50.2 |
| Validation | H_N122 | H     | M   | 59 | 175 | 75   | 24 | 3                | 27 | 29  | 17    | 68.1 | 39.6 |
| Validation | H_N104 | H     | M   | 37 | 176 | 60.1 | 20 | 2.1              | 20 | 19  | 16    | 71.7 | 50.5 |
| Validation | C_65   | HCC A | M   | 46 | 168 | 60   | 21 | 4 ### 5.0×3.7    | 70 | 53  | 31 A  | 64.3 | 38.2 |
| Validation | C_31   | HCC A | M   | 47 | 168 | 64   | 23 | 2 353 2.1×2.0    | 39 | 37  | 58 A  | 61.7 | 37.6 |
| Validation | C_99   | HCC A | M   | 49 | 165 | 65   | 24 | 4 ### 4.3×4.0    | 62 | 112 | 225 B | 72.3 | 28.4 |
| Validation | C_76   | HCC A | M   | 48 | 175 | 76.5 | 25 | 3 4.4 3×2        | 24 | 24  | 70 A  | 60.8 | 39.8 |
| Validation | C_37   | HCC A | F   | 42 | 152 | 55   | 24 | 2 123 2.5×2.2    | 46 | 38  | 72 A  | 69.1 | 41.8 |
| Validation | C_HCC  | HCC   | 0 M | 49 | 170 | 57.5 | 20 | 1 2 1.5×1.1      | 44 | 35  | 61 A  | 67.1 | 39.5 |
| Validation | C_66   | HCC   | 0 F | 47 | 163 | 69   | 26 | 3 ### 1.8×1.8×1. | 32 | 26  | 24 A  | 66.7 | 42.2 |
| Validation | C_HCC  | HCC   | 0 M | 57 | 170 | 60   | 21 | 1 2.3 1.1×1      | 25 | 22  | 29 A  | 71.2 | 38.9 |
| Validation | C_78   | HCC   | 0 M | 51 | 184 | 84   | 25 | 1 17 1.9×1.5     | 43 | 61  | 258 A | 75.7 | 43.2 |
| Validation | C_107  | HCC   | 0 M | 58 | 170 | 65   | 22 | 1 4.8 1.9×1.7    | 21 | 24  | 26 A  | 54.5 | 30.4 |
| Validation | C_35   | HCC   | 0 M | 49 | 168 | 60.5 | 21 | 2 37 1.4×1.3×1   | 19 | 23  | 24 A  | 58.2 | 35.4 |

|            |        |       |     |    |     |      |    |      |      |             |     |     |       |      |      |
|------------|--------|-------|-----|----|-----|------|----|------|------|-------------|-----|-----|-------|------|------|
| Validation | C_104  | HCC A | M   | 51 | 168 | 64   | 23 | 2    | 4.2  | 2.1×1.6     | 28  | 30  | 170 A | 63.6 | 39.8 |
| Validation | C_40   | HCC A | M   | 47 | 171 | 78   | 27 | 2    | 22   | 3.7×3.2     | 51  | 69  | 102 A | 61.7 | 40.8 |
| Validation | C_43   | HCC A | M   | 50 | 180 | 76   | 23 | 2    | 171  | 2.6×1.5     | 54  | 120 | 50 A  | 70.3 | 41.2 |
| Validation | C_48   | HCC A | M   | 44 | 159 | 47   | 19 | 3    | 544  | 2.5×1.7     | 10  | 16  | 7 A   | 77.9 | 49.9 |
| Validation | C_57   | HCC A | M   | 54 | 173 | 68   | 23 | 2    | 3.1  | 4.2×3.7     | 27  | 27  | 113 A | 66.4 | 40.7 |
| Validation | C_67   | HCC A | F   | 57 | 155 | 44.5 | 19 | 3    | 459  | 2.7×2.6     | 21  | 35  | 40 A  | 62.8 | 35.7 |
| Validation | C_HCC: | HCC A | F   | 41 | 162 | 58   | 22 | 3    | ###  | 4×2.2×2     | 35  | 36  | 29 A  | 72.4 | 39   |
| Validation | C_HCC: | HCC A | M   | 54 | 183 | 62   | 19 | 1    | 5.5  | 3.8×4.4     | 42  | 32  | 69 A  | 74.5 | 45.2 |
| Validation | C_HCC: | HCC A | M   | 52 | 173 | 65   | 22 | 1    | 2.1  | 4.7×3.2     | 24  | 26  | 53 A  | 64   | 42.6 |
| Validation | C_HCC: | HCC A | M   | 56 | 163 | 53   | 20 | 1    | 4.4  | 2.2×2       | 20  | 22  | 16 A  | 67.2 | 42   |
| Validation | C_15   | HCC A | M   | 60 | 172 | 71   | 24 | 2    | 13   | 2.5×2.5; 1  | 46  | 34  | 46 A  | 61.2 | 35   |
| Validation | C_2    | HCC   | 0 M | 45 | 172 | 65   | 22 | 1    | 3.6  | 2cm         | 13  | 14  | 34 A  | 72.5 | 48.1 |
| Validation | C_80   | HCC A | M   | 54 | 165 | 65   | 24 | 1    | 2.6  | 3.3×2.8     | 22  | 25  | 30 A  | 71.2 | 40.7 |
| Validation | C_84   | HCC A | M   | 51 | 170 | 65   | 22 | 1    | 1.5  | 4×5         | 11  | 19  | 11 A  | 65   | 37.5 |
| Validation | C_87   | HCC A | M   | 57 | 172 | 72   | 24 | 3    | 2.2  | 3.8×3.8     | 38  | 26  | 72 A  | 69.7 | 39.8 |
| Validation | C_93   | HCC A | M   | 54 | 167 | 72   | 26 | 1    | 7.8  | 3.5×2.3     | 19  | 23  | 66 A  | 64.1 | 38.6 |
| Validation | C_HCC  | HCC   | 0 F | 35 | 155 | 44   | 18 | 1    | 3.6  | 1.6cm       | 11  | 19  | 12 A  | 74.7 | 42.7 |
| Validation | C_HCC: | HCC A | M   | 52 | 170 | 58   | 20 | 2    | 55   | 2.5×2.3×1.  | 20  | 20  | 36 A  | 67.4 | 42   |
| Validation | C_HCC: | HCC   | 0 F | 57 | 160 | 50   | 20 | 2    | 104  | 2×1.8×2     | 8   | 19  | 15 A  | 71.7 | 44.4 |
| Validation | C_103  | HCC B | M   | 52 | 168 | 54   | 19 | 2    | 93   | 11.3×8.6    | 38  | 58  | 127 A | 66.4 | 34.3 |
| Validation | C_108  | HCC B | M   | 57 | 160 | 53   | 21 | 1    | 4.5  | 6.7×6.0×4.  | 24  | 25  | 92 A  | 63.1 | 37.3 |
| Validation | C_110  | HCC C | M   | 58 | 167 | 55   | 20 | 2    | 105  | 9.6×8.2     | 17  | 31  | 124 A | 87.8 | 39.5 |
| Validation | C_21   | HCC B | M   | 49 | 170 | 75   | 26 | 4    | ###  | 3.0×2.2; 5. | 33  | 29  | 95 A  | 64   | 39.6 |
| Validation | C_26   | HCC C | M   | 56 | 166 | 71.5 | 26 | 3    | ###  | 7.8×7.2; 1  | 109 | 135 | 85 A  | 59.9 | 37.8 |
| Validation | C_33   | HCC B | M   | 53 | 168 | 56   | 20 | 3    | ###  | 5.5×4.5     | 20  | 29  | 47 A  | 68.6 | 45.3 |
| Validation | C_42   | HCC C | M   | 58 | 158 | 56   | 22 | TACE | 43   | 8.6×6.4     | 47  | 52  | 318 A | 76   | 39.8 |
| Validation | C_52   | HCC C | M   | 51 | 171 | 63   | 22 | ND   | >800 | 11.6×1.06   | 33  | 38  | 163 A | 62.3 | 35.7 |
| Validation | C_55   | HCC B | M   | 48 | 170 | 71.5 | 25 | TACE | 18   | 6.0×4.9     | 68  | 54  | 83 A  | 68.7 | 38.4 |
| Validation | C_56   | HCC B | M   | 47 | 160 | 65   | 25 | 3    | ###  | 5.9×5.8     | 20  | 27  | 66 A  | 78   | 49.1 |
| Validation | C_72   | HCC B | M   | 44 | 165 | 54.5 | 20 | 1    | 7.3  | 4.9×6.2     | 83  | 63  | 242 A | 77.7 | 44.2 |
| Validation | C_8    | HCC B | M   | 52 | 158 | 62   | 25 | 3    | >800 | 5.5×4.5×4   | 57  | 74  | 84 A  | 64.1 | 38.4 |
| Validation | C_98   | HCC C | F   | 57 | 163 | 55   | 21 | 2    | 339  | 10 cm with  | 145 | 159 | 336 A | 69.4 | 33.8 |
| Validation | C_HCC  | HCC B | M   | 58 | 169 | 45   | 16 | 2    | 3.5  | 7×5; 1.5×1  | 19  | 31  | 21 A  | 69.5 | 44   |
| Validation | C_HCC  | HCC B | M   | 56 | 170 | 58   | 20 | 2    | 19   | 11×10.4     | 24  | 44  | 126 A | 65.9 | 36.8 |
| Validation | C_HCC  | HCC B | M   | 55 | 172 | 66   | 22 | 2    | ###  | 6.5×5       | 48  | 44  | 240 A | 62.7 | 35.5 |
| Validation | C_HCC  | HCC B | M   | 47 | 156 | 51   | 21 | ND   | >800 | 12×14       | 60  | 66  | 485 A | 73   | 43   |
| Validation | C_HCC  | HCC B | M   | 36 | 186 | 63.5 | 18 | 2    | 46   | 15×12×10    | 33  | 91  | 107 A | 58.6 | 36.4 |
| Validation | C_HCC  | HCC B | M   | 51 | 165 | 65   | 24 | 2    | 12   | 5.5×5; 2.1  | 39  | 33  | 78 A  | 72   | 43.4 |
| Validation | C_HCC  | HCC B | M   | 51 | 168 | 68   | 24 | 4    | ###  | 12×8×8      | 38  | 33  | 147 A | 70.8 | 45.1 |
| Validation | C_HCC: | HCC B | M   | 44 | 170 | 69   | 24 | ND   | >800 | 11.6×14.1   | 47  | 93  | 238 A | 72   | 46   |
| Validation | C_HCC: | HCC B | M   | 57 | 162 | 50   | 19 | 2    | ###  | 9×7×5       | 141 | 123 | 588 A | 63.4 | 34.1 |
| Validation | C_HCC: | HCC B | M   | 49 | 170 | 67.5 | 23 | 1    | 3.5  | 12×11×8     | 22  | 84  | 102 A | 62   | 40.1 |
| Validation | C_HCC: | HCC B | M   | 45 | 173 | 67   | 22 | 4    | ###  | 6.5×3.2     | 32  | 35  | 87 A  | 64   | 38   |
| Validation | C_HCC: | HCC B | M   | 58 | 168 | 52   | 18 | ND   | ###  | 7.0×5.2     | 81  | 118 | 501 A | 68.4 | 41.3 |
| Validation | C_HCC: | HCC B | M   | 50 | 180 | 61   | 19 | 3    | ###  | 11×10       | 36  | 59  | 118 A | 70.5 | 41.3 |
| Validation | C_HCC: | HCC B | M   | 47 | 170 | 52   | 18 | ND   | ###  | 11.3×6.8    | 21  | 35  | 109 A | 74.8 | 48.9 |
| Validation | C_HCC: | HCC B | M   | 48 | 168 | 70   | 25 | 2    | 964  | 14×13×7     | 23  | 92  | 108 A | 73.6 | 42.2 |
| Validation | C_HCC: | HCC B | M   | 58 | 156 | 53   | 22 | 2    | 83   | 6.5×3.5     | 23  | 40  | 40 A  | 68.2 | 33.1 |
| Validation | C_HCC: | HCC B | M   | 57 | 164 | 62   | 23 | ND   | ###  | 11.5×8.8×   | 87  | 132 | 205 A | 63.3 | 33.4 |
| Validation | C_16   | HCC B | M   | 43 | 174 | 69   | 23 | 2    | 8.9  | 7×6×7       | 43  | 30  | 64 A  | 65.9 | 39.6 |
| Validation | C_17   | HCC B | M   | 47 | 165 | 60   | 22 | 2    | 68   | 6×6×8       | 11  | 22  | 102 A | 72.6 | 40   |
| Validation | C_25   | HCC C | M   | 41 | 179 | 77.5 | 24 | ND   | ###  | 8.1×8.0     | 33  | 46  | 225 A | 64.3 | 32.8 |
| Validation | C_3    | HCC B | M   | 38 | 176 | 79   | 26 | 3    | 9.4  | 11.2×9.5    | 80  | 58  | 67 A  | 69   | 47.6 |

|                   |       |        |   |    |     |      |    |      |      |             |      |     |      |   |      |       |
|-------------------|-------|--------|---|----|-----|------|----|------|------|-------------|------|-----|------|---|------|-------|
| Validation        | C_30  | HCC B  | M | 51 | 168 | 67   | 24 | 3    | 16   | 17×15×4     | 25   | 20  | 17   | A | 63.4 | 37    |
| Validation        | C_4   | HCC B  | F | 48 | 157 | 55   | 22 | 2    | ###  | 6.4×5.4×4.  | 17   | 38  | 91   | A | 70.2 | 44.2  |
| Validation        | C_45  | HCC B  | M | 44 | 170 | 78   | 27 | TACE | 31   | 15.2×14.9   | 61   | 121 | 416  | A | 64   | 33.6  |
| Validation        | C_50  | HCC B  | M | 46 | 170 | 54   | 19 | TACE | 363  | 6.3×3.9     | 26   | 32  | 73   | A | 72   | 42.4  |
| Validation        | C_59  | HCC B  | M | 59 | 169 | 60   | 21 | 2    | 55   | 7.1×4.7     | 36   | 39  | 127  | A | 70.6 | 38.4  |
| Validation        | C_71  | HCC B  | M | 50 | 170 | 75   | 26 | 3    | 206  | 7×6         | 16   | 22  | 77   | A | 57.9 | 33.3  |
| Validation        | C_79  | HCC B  | M | 44 | 165 | 61   | 22 | 1    | 6.6  | 7.0×6.3     | 17   | 27  | 268  | A | 78.3 | 35.8  |
| Validation        | C_9   | HCC B  | M | 52 | 158 | 62   | 25 | 3    | ###  | 7×6         | 85   | 92  | 132  | A | 64.1 | 38.4  |
| Validation        | C_92  | HCC B  | M | 46 | 168 | 54   | 19 | 3    | ###  | 6.9×6.2     | 65   | 88  | 122  | A | 67.1 | 36.8  |
| Validation        | C_HCC | HCC B  | M | 54 | 175 | 69   | 23 | 2    | 339  | 6.0×3.9     | 15   | 24  | 52   | A | 66.8 | 39    |
| Validation        | C_HCC | HCC B  | M | 55 | 165 | 60   | 22 | 2    | 13   | 7.4×6.5     | 18   | 24  | 31   | A | 73.3 | 42.4  |
| Independent diagn | XJ_1  | HCC B  | M | 53 | 170 | 64   | 22 | ND   | 58   | 6.4×5.2     | 42.6 | 60  | 702  | A | 68.8 | 27.5  |
| Independent diagn | XJ_2  | HCC A1 | F | 71 | 155 | 55   | 20 | ND   | 8.1  | 4.3×3.7     | 11.8 | 18  | 22.6 | A | 65.9 | 42.22 |
| Independent diagn | XJ_3  | HCC B  | M | 63 | 165 | 68   | 25 | ND   | 18   | 7.2×6.1     | 687  | 755 | 173  | A | 67.5 | 23.4  |
| Independent diagn | XJ_4  | HCC A2 | M | 57 | 172 | 66   | 20 | 2    | >100 | 4.5×3.8     | 30.7 | 1.1 | 29.4 | A | 50.5 | 28.73 |
| Independent diagn | XJ_5  | HCC B  | M | 59 | 173 | 84   | 20 | ND   | 19   | 10.9×9.6    | 40.2 | 36  | 51.5 | A | 75.3 | 42.4  |
| Independent diagn | XJ_6  | HCC A  | M | 57 | 165 | 68   | 25 | ND   | >100 | 3.8×2.7     | 45.5 | 0.9 | 199  | A | 60.7 | 32.9  |
| Independent diagn | XJ_7  | HCC A1 | M | 54 | 170 | 77   | 20 | 1    | 0.7  | 3.2×2.4     | 25.3 | 23  | 114  | A | 72.5 | 42    |
| Independent diagn | XJ_8  | HCC A  | M | 75 | 175 | 82   | 20 | ND   | >100 | 3.1×2.4     | 111  | 113 | 657  | B | 75.4 | 36    |
| Independent diagn | XJ_9  | HCC A1 | M | 49 | 175 | 60   | 20 | 2    | 6.7  | 4.1×2.4     | 551  | 290 | 71.9 | A | 60.6 | 41.83 |
| Independent diagn | XJ_10 | HCC A1 | M | 71 | 162 | 68   | 26 | ND   | >100 | 4.0×2.9     | 193  | 125 | 76   | A | 74.2 | 36.2  |
| Independent diagn | XJ_11 | HCC A3 | F | 75 | 153 | 56   | 20 | ND   | 161  | 3.3×2.0     | 35.2 | 82  | 367  | B | 74.2 | 35.7  |
| Independent diagn | XJ_12 | HCC B  | M | 71 | 168 | 52   | 20 | ND   | 35   | 5.9×5.2     | 262  | 162 | 104  | A | 66.4 | 31    |
| Independent diagn | XJ_13 | HCC C  | M | 78 | 165 | 69   | 25 | ND   | >100 | 10.4×7.4    | 52.7 | 72  | 378  | A | 65.4 | 34    |
| Independent diagn | XJ_14 | HCC A3 | F | 75 | 150 | 61   | 20 | ND   | 102  | 1.5×1.5     | 176  | 158 | 640  | B | 73.3 | 38.6  |
| Independent diagn | XJ_15 | HCC B  | M | 59 | 173 | 84   | 20 | ND   | 29   | 12.9×10.4   | 86.4 | 67  | 82.3 | A | 77.6 | 40.8  |
| Independent diagn | XJ_16 | HCC A  | F | 54 | 160 | 57   | 20 | 3    | >100 | 1.6×1.5     | 26.2 | 24  | 45.7 | A | 77.9 | 49.08 |
| Independent diagn | XJ_17 | HCC B  | M | 47 | 168 | 62   | 22 | 3    | 40   | 9.9×5.7     | 28   | 42  | 151  | A | 69.9 | 29.7  |
| Independent diagn | XJ_18 | HCC B  | M | 47 | 168 | 62   | 22 | 3    | 40   | 9.9×5.7     | 28   | 42  | 151  | A | 69.9 | 29.7  |
| Independent diagn | ZD_1  | HCC A  | M | 45 | 160 | 65   | 25 | 1    | 33   | 3x3.5x3     | 298  | 397 | 1390 | B | 60.3 | 30    |
| Independent diagn | ZD_2  | HCC A  | M | 56 | 167 | 69   | 25 | 2    | 35   | 3.5x3.5x3.  | 104  | 98  | 356  | A | 58   | 35    |
| Independent diagn | ZD_3  | HCC A  | M | 30 | 170 | 75   | 26 | 1    | 25   | 3.5x4x2     | 33   | 48  | 57   | B | 77   | 41.3  |
| Independent diagn | ZD_4  | HCC B  | M | 65 | 166 | 65.5 | 24 | 2    | 6.2  | 6.6x7.6x8c  | 11   | 32  | 60   | A | 7.2  | 32    |
| Independent diagn | ZD_5  | HCC B  | F | 65 | 168 | 62   | 22 | 2    | 6.1  | 6x4x4cm     | 21   | 21  | 43   | A | 71.5 | 43.9  |
| Independent diagn | ZD_6  | HCC A  | M | 52 | 158 | 56   | 22 | ND   | ND   | 3x3x5cm     | 71   | 44  | 221  | A | 69.1 | 42.2  |
| Independent diagn | ZD_7  | HCC A  | M | 63 | 171 | 63   | 22 | 1    | 4.6  | 1x1x0.9cm   | 35   | 33  | 50   | A | 72   | 44.7  |
| Independent diagn | ZD_8  | HCC A  | M | 47 | 170 | 71.5 | 25 | 4    | ###  | 3x2.2x4cm   | 186  | 388 | 1089 | C | 61.9 | 26.9  |
| Independent diagn | ZD_9  | HCC C  | M | 36 | 160 | 65   | 25 | 4    | ###  | 18x17x16c   | 11   | 59  | 266  | A | 65.2 | 30.3  |
| Independent diagn | ZD_10 | HCC B  | M | 51 | 165 | 54.5 | 20 | 3    | 205  | 10.3x6.5x5  | 55   | 68  | 55   | A | 85   | 40.5  |
| Independent diagn | ZD_11 | HCC B  | M | 51 | 158 | 62   | 25 | 3    | 205  | 8x6x4cm     | 55   | 68  | 55   | A | 85   | 40.5  |
| Independent diagn | ZD_12 | HCC A  | M | 67 | 163 | 55   | 21 | 1    | 11   | 3x3x2.8cm   | 31   | 60  | 45   | A | 54.3 | 26.1  |
| Independent diagn | ZD_13 | HCC B  | F | 30 | 169 | 65.5 | 23 | 2    | 32   | 73x62x72r   | 27   | 40  | 45   | A | 61.9 | 37    |
| Independent diagn | ZD_14 | HCC A  | M | 46 | 170 | 67.5 | 23 | 3    | 325  | diameter 5. | 301  | 143 | 528  | A | 65.9 | 42.2  |
| Independent diagn | ZD_51 | HCC A  | F | 48 | 172 | 66   | 22 | 3    | 2.4  | 4x3x2.5cm   | 77   | 45  | 45   | B | 61.2 | 37.6  |
| Independent diagn | ZD_16 | HCC C  | F | 52 | 156 | 51   | 21 | 4    | ###  | 8.5x10x8c   | 125  | 135 | 266  | B | 60   | 30    |
| Independent diagn | ZD_17 | HCC B  | M | 54 | 186 | 73.5 | 21 | 4    | ###  | 8x7x10cm    | 82   | 184 | 413  | B | 75.6 | 35    |
| Independent diagn | ZD_18 | HCC A  | M | 47 | 165 | 65   | 24 | 3    | 627  | 5.0x4.5cm   | 40   | 66  | 87   | C | 65.3 | 32.4  |
| Independent diagn | ZD_19 | HCC B  | M | 45 | 168 | 68   | 24 | 4    | ###  | 6x4x5cm     | 39   | 48  | 205  | A | 53.3 | 29.6  |
| Independent diagn | ZD_20 | HCC A  | M | 51 | 170 | 69   | 24 | 1    | 25   | 24x19x24r   | 26   | 22  | 28   | A | 63.3 | 42.5  |
| Independent diagn | ZD_21 | HCC C  | M | 38 | 162 | 60   | 23 | 4    | ###  | 12x18x11c   | 82   | 210 | 709  | A | 64.9 | 41.2  |

|                         |       |   |    |     |      |    |   |     |            |     |     |       |      |      |
|-------------------------|-------|---|----|-----|------|----|---|-----|------------|-----|-----|-------|------|------|
| Independent diagn ZD_22 | HCC A | F | 49 | 170 | 67.5 | 23 | 1 | 23  | 4x2.5x2cm  | 45  | 53  | 125 A | 72   | 35   |
| Independent diagn ZD_23 | HCC A | M | 48 | 173 | 67   | 22 | 1 | 15  | 3x4x3cm    | 55  | 56  | 130 A | 70   | 35   |
| Independent diagn ZD_24 | HCC A | M | 53 | 168 | 72   | 26 | 2 | 87  | 5x4x4cm    | 84  | 79  | 96 B  | 54   | 30.7 |
| Independent diagn ZD_25 | HCC A | M | 53 | 180 | 71   | 22 | 1 | 8.2 | 5x4x4cm    | 35  | 27  | 68 A  | 74.9 | 44.1 |
| Independent diagn ZD_26 | HCC A | M | 50 | 170 | 72   | 25 | 1 | 7   | 4x4x4cm    | 111 | 94  | 117 A | 74.1 | 46.5 |
| Independent diagn ZD_27 | HCC A | M | 53 | 168 | 70   | 25 | 1 | 27  | 19X24mm    | 37  | 48  | 114 B | 56.1 | 32.5 |
| Independent diagn ZD_28 | HCC A | M | 47 | 156 | 73   | 30 | 1 | 43  | 50x30x47r  | 20  | 23  | 18 A  | 60.6 | 41.4 |
| Independent diagn ZD_29 | HCC A | M | 45 | 164 | 62   | 23 | 3 | >10 | 3.6x3.9x4. | 59  | 301 | 406 B | 62.1 | 30   |
| Independent diagn ZD_30 | HCC B | M | 37 | 174 | 69   | 23 | 4 | ### | 6x7x8.5cm  | 111 | 333 | 544 B | 59.9 | 34   |
| Independent diagn ZD_32 | HCC A | M | 57 | 174 | 74.5 | 25 | 1 | 1.9 | 3.6x4x4cm  | 27  | 29  | 31 A  | 83.9 | 38.3 |
| Independent diagn ZD_33 | HCC B | M | 62 | 160 | 62   | 24 | 2 | 4.2 | 7.5x5.4x5c | 13  | 16  | 61 A  | 64.2 | 37   |
| Independent diagn ZD_34 | HCC A | M | 71 | 175 | 85   | 28 | 3 | 339 | 4.5x4x4cm  | 14  | 25  | 66 A  | 54.5 | 31.5 |
| Independent diagn ZD_35 | HCC C | F | 44 | 168 | 75   | 27 | 1 | 8.5 | diameter 9 | 19  | 39  | 17 A  | 60.5 | 31   |
| Independent diagn ZD_36 | HCC A | M | 54 | 163 | 68   | 26 | 4 | ### | 4.8x4.2x4. | 53  | 39  | 118 A | 56.9 | 35.6 |
| Independent diagn ZD_37 | HCC B | M | 62 | 170 | 66   | 23 | 2 | 216 | 8.5x7.6x5. | 15  | 24  | 111 A | 62.3 | 37.2 |
| Independent diagn ZD_38 | HCC A | M | 53 | 176 | 71   | 23 | 2 | 4.3 | 4x3x2.5cm  | 34  | 31  | 54 A  | 44.1 | 28.2 |
| Independent diagn ZD_39 | HCC B | F | 53 | 155 | 63.5 | 26 | 2 | 169 | diameter 6 | 35  | 57  | 25 A  | 71.5 | 40.6 |
| Independent diagn ZD_40 | HCC A | M | 47 | 156 | 65   | 27 | 1 | 4.4 | 0.8x0.7x1. | 42  | 39  | 24 A  | 82.7 | 53.3 |
| Independent diagn ZD_41 | HCC B | M | 62 | 165 | 68   | 25 | 3 | 317 | 4*3;2*3;4* | 48  | 86  | 197 A | 68.7 | 39.5 |
| Independent diagn ZD_42 | HCC C | M | 52 | 180 | 75   | 23 | 1 | 2.9 | 12x16x10c  | 27  | 376 | 475 A | 85.8 | 45.5 |
| Independent diagn ZD_43 | HCC A | M | 64 | 170 | 63   | 22 | 2 | 91  | 16.8x15.5r | 12  | 19  | 25 A  | 65.7 | 46.7 |
| Independent diagn ZD_44 | HCC B | M | 52 | 181 | 71   | 22 | 2 | 41  | 6.8x6.1x8c | 24  | 32  | 81 A  | 57.4 | 35.3 |
| Independent diagn ZD_45 | HCC A | M | 68 | 162 | 73.5 | 28 | 1 | 7.4 | 2.3x2.8x2. | 104 | 145 | 111 A | 62.2 | 34.1 |
| Independent diagn ZD_46 | HCC C | M | 52 | 157 | 56   | 23 | 2 | 21  | 8x9x12cm   | 703 | 450 | 274 B | 62.3 | 29   |
| Independent diagn ZD_47 | HCC A | M | 73 | 160 | 60   | 23 | 2 | 20  | 2.4x2.8x3. | 26  | 28  | 43 A  | 67.8 | 39.5 |
| Independent diagn ZD_48 | HCC A | F | 68 | 160 | 54   | 21 | 2 | 72  | diameter 1 | 64  | 53  | 26 A  | 64.2 | 43.1 |
| Independent diagn ZD_49 | HCC A | F | 49 | 168 | 77   | 27 | 1 | 9.1 | 2.8x2.5x2c | 9   | 15  | 11 A  | 62.6 | 42.1 |
| Independent diagn ZD_50 | HCC A | M | 54 | 171 | 63.5 | 22 | 1 | 2   | 2.3x2.2x1. | 23  | 23  | 27 A  | 65.6 | 45.2 |
| Independent diagn ZD_52 | HCC A | F | 54 | 164 | 58   | 21 | 1 | 2.4 | 0.7x0.7x1. | 23  | 30  | 34 A  | 61.1 | 31.2 |
| Independent diagn ZD_53 | HCC B | M | 54 | 178 | 70   | 22 | 1 | 7.2 | 9x7.7x7cm  | 43  | 56  | 46 A  | 69.2 | 33   |
| Independent diagn ZD_54 | HCC A | M | 64 | 172 | 79   | 27 | 1 | 2.7 | 4.7x4.8x4c | 36  | 27  | 47 C  | 52.9 | 26.6 |
| Independent diagn ZD_55 | HCC B | M | 57 | 177 | 65   | 21 | 2 | 59  | 6.5x6x4.5  | 63  | 95  | 129 A | 66.2 | 37.5 |
| Independent diagn ZD_56 | HCC B | M | 64 | 171 | 71   | 24 | 4 | ### | 8x9x8cm    | 61  | 111 | 189 A | 57.5 | 34.5 |
| Independent diagn ZD_57 | HCC C | M | 45 | 177 | 81   | 26 | 4 | ### | 13x10x9cm  | 98  | 157 | 375 A | 76.3 | 42.3 |
| Independent diagn ZD_58 | HCC A | F | 53 | 166 | 76.5 | 28 | 1 | 1.8 | 5x3x2.5cm  | 15  | 13  | 22 A  | 74.1 | 44.4 |
| Independent diagn ZD_59 | HCC A | M | 55 | 182 | 70   | 21 | 3 | 125 | 3.4x2.6x3c | 59  | 42  | 38 A  | 63.2 | 35.2 |
| Independent diagn ZD_60 | HCC A | M | 58 | 172 | 60.5 | 20 | 1 | 6.2 | 4x3x4cm    | 54  | 75  | 85 A  | 63.5 | 36   |
| Independent diagn ZD_61 | HCC B | F | 45 | 175 | 85   | 28 | 1 | 4.2 | 5x6x6cm    | 11  | 34  | 209 A | 70.2 | 38.4 |
| Independent diagn ZD_62 | HCC B | M | 66 | 169 | 74   | 26 | 4 | ### | 6x7x8cm    | 42  | 33  | 69 A  | 59.9 | 43.1 |
| Independent diagn ZD_63 | HCC A | F | 66 | 176 | 66.5 | 22 | 1 | 1.7 | diameter 2 | 16  | 29  | 16 A  | 63.1 | 41.9 |
| Independent diagn ZD_64 | HCC A | M | 77 | 174 | 68   | 22 | 1 | 0.6 | diameter 4 | 78  | 68  | 361 A | 64.6 | 43.1 |
| Independent diagn ZD_65 | HCC B | M | 53 | 163 | 60   | 23 | 3 | 330 | 6x5.7x5.4c | 38  | 45  | 86 A  | 70.5 | 42.1 |
| Independent diagn ZD_66 | HCC A | M | 37 | 182 | 70   | 21 | 3 | 1.9 | 2x1.5x1cm  | 128 | 77  | 784 A | 62.1 | 41.8 |
| Independent diagn ZD_67 | HCC A | M | 44 | 160 | 67   | 26 | 4 | ### | diameter 3 | 43  | 45  | 630 A | 70.3 | 34.3 |
| Independent diagn ZD_68 | HCC B | F | 52 | 168 | 75   | 27 | 4 | ### | 6.8x8.8x9c | 524 | ### | 456 C | 51.2 | 24.3 |
| Independent diagn ZD_69 | HCC A | F | 63 | 168 | 65   | 23 | 1 | 1.3 | diameter 3 | 13  | 17  | 48 A  | 63.2 | 41.4 |
| Independent diagn ZD_70 | HCC C | M | 54 | 167 | 70   | 25 | 3 | >10 | 13x9x11cm  | 29  | 94  | 300 B | 59.3 | 27.2 |
| Independent diagn ZD_71 | HCC B | M | 47 | 175 | 70   | 23 | 2 | 159 | 54x37mm    | 58  | 35  | 32 A  | 62.7 | 42.9 |
| Independent diagn ZD_31 | HCC C | F | 46 | 165 | 68   | 25 | 4 | ### | 13x8x5     | 17  | 56  | 26 A  | 70.6 | 42.3 |
| Independent diagn HN_6  | HCC A | M | 30 | 174 | 64   | 21 | 2 | 25  | 3.5x3.5x3. | 33  | 48  | 57 B  | 77   | 41.3 |
| Independent diagn HN_1  | HCC A | F | 56 | 165 | 65   | 24 | 2 | 15  | 3.5x4x3    | 45  | 56  | 68 A  | 65   | 34   |
| Independent diagn HN_2  | HCC C | F | 64 | 175 | 76.5 | 25 | 4 | >12 | 10x11x12c  | 50  | 172 | 559 B | 71.2 | 40.9 |
| Independent diagn HN_3  | HCC A | M | 39 | 152 | 55   | 24 | 2 | 190 | 2x1x3cm    | 97  | 67  | 61 A  | 79.3 | 49.3 |
| Independent diagn HN_4  | HCC C | M | 40 | 170 | 67.5 | 23 | 2 | 9.5 | 10x9x11cm  | 111 | 188 | 185 B | 77.8 | 51.2 |

|                         |       |   |    |     |      |    |   |     |           |    |    |     |   |      |      |
|-------------------------|-------|---|----|-----|------|----|---|-----|-----------|----|----|-----|---|------|------|
| Independent diagn HN_5  | HCC C | M | 52 | 163 | 69   | 26 | 1 | 3.1 | 11x10x10c | 44 | 54 | 363 | B | 71.5 | 39.1 |
| Independent diagn HN_7  | HCC B | F | 66 | 160 | 63.5 | 25 | 2 | 523 | 7.5x5x5cr | 19 | 36 | 29  | A | 60.6 | 39.4 |
| Independent diagn HN_8  | HCC A | M | 62 | 168 | 65   | 23 | 2 | 6.5 | 5x5x3cm   | 39 | 33 | 46  | A | 71.9 | 39.5 |
| Independent diagn HN_9  | HCC C | M | 35 | 168 | 68   | 24 | 2 | 19  | 11x11x7cr | 30 | 69 | 76  | A | 73.7 | 48.3 |
| Independent diagn HN_10 | HCC B | M | 35 | 167 | 65   | 23 | 2 | 12  | 9x8x7cm   | 42 | 73 | 76  | A | 72   | 39.1 |

Abbreviations: BCLC stage, Barcelona Clinic Liver Cancer staging; BMI, body mass index; AFP, alphafetoprotein; ALT, alanine aminotransferase; AST, aspartate aminotransferase; GGT, glutamyl transpeptidase; CTP score, Child-Turcotte-Pugh score; TP, total protein; ALB, albumin; GLO, globulin; TB, total bilirubin; DB, direct bilirubin; IB, indirect bilirubin; PT, prothrombin time; PLT, platelet; CEA, Carcino-embryonic Antigen; TACE, transarterial chemoembolisation; PVTT, portal vein tumor thrombus; ND, no detection

| GLO<br>(20.0-<br>35.0<br>g/L) | TB<br>(0-21<br>μ<br>mol/L<br>)<br>3.4<br>~<br>17.1 | DB<br>0-5<br>μ<br>mol<br>/L | IB<br>3-<br>14μ<br>mol/<br>L | PT<br>(12-<br>14<br>s) | D-<br>dime<br>r<br><200<br>μg/L | PLT<br>83-<br>303<br>10E9/<br>L | CEA<br>0.0-<br>5.0<br>ng/mL | CA<br>199<br>0.0-<br>37.0<br>U/m<br>L | CA<br>125<br>0.0-<br>35.0<br>U/m<br>L | Ferropr<br>otein<br>M:80-<br>130;F:3<br>5-55<br>ng/mL | CA<br>153<br><28<br>U/m<br>L | Cirr<br>hotic<br>or<br>N) | HBsAg<br>positiv<br>e (Y<br>or<br>N) | Complic<br>ation (Y<br>or<br>N) | Dietary habit |
|-------------------------------|----------------------------------------------------|-----------------------------|------------------------------|------------------------|---------------------------------|---------------------------------|-----------------------------|---------------------------------------|---------------------------------------|-------------------------------------------------------|------------------------------|---------------------------|--------------------------------------|---------------------------------|---------------|
| 26.4                          | 14                                                 | 4                           | 10                           |                        |                                 | 255                             |                             |                                       |                                       |                                                       |                              |                           |                                      |                                 | mixed diet    |
| 31.8                          | 5                                                  | 2                           | 3                            |                        |                                 | 242                             | 0.9                         | 2.2                                   | 73.2                                  | 55.9                                                  | 11.6                         |                           |                                      |                                 | mixed diet    |
| 23.5                          | 11                                                 | 3                           | 8                            |                        |                                 | 90                              | 2.5                         | 5.7                                   | 13                                    |                                                       |                              |                           |                                      |                                 | mixed diet    |
| 20.8                          | 17                                                 | 5                           | 12                           |                        |                                 | 142                             | 2.8                         | 50.3                                  | 6.8                                   |                                                       |                              |                           |                                      |                                 | mixed diet    |
| 26.3                          | 8                                                  | 3                           | 5                            |                        |                                 | 311                             | 2.1                         | 17.4                                  | 4.7                                   |                                                       |                              |                           |                                      |                                 | mixed diet    |
| 27.2                          | 13                                                 | 4                           | 9                            |                        |                                 | 257                             | 2.2                         | 24.3                                  | 11.5                                  |                                                       |                              |                           |                                      |                                 | mixed diet    |
| 25.6                          | 8                                                  | 4                           | 4                            |                        |                                 | 220                             | 1.8                         | 4.2                                   | 9.6                                   |                                                       |                              |                           |                                      |                                 | mixed diet    |
| 25.1                          | 16                                                 | 5                           | 11                           |                        |                                 | 212                             | 3.9                         | 11.4                                  | 11.5                                  |                                                       |                              |                           |                                      |                                 | mixed diet    |
| 20.3                          | 16                                                 | 5                           | 11                           |                        |                                 | 213                             | 0.9                         | 7.1                                   | 5.8                                   | 435.9                                                 |                              |                           |                                      |                                 | mixed diet    |
| 26.9                          | 9                                                  | 4                           | 5                            |                        |                                 | 193                             | 4.2                         | 21                                    | 8.7                                   | 66.5                                                  |                              |                           |                                      |                                 | mixed diet    |
| 21.1                          | 9                                                  | 4                           | 5                            |                        |                                 | 268                             | null                        | null                                  | null                                  |                                                       |                              |                           |                                      |                                 | mixed diet    |
| 22.6                          | 17                                                 | 4                           | 13                           |                        |                                 | 206                             | 1.1                         | 5                                     | 13                                    | 240.1                                                 |                              |                           |                                      |                                 | mixed diet    |
| 23.1                          | 14                                                 | 5                           | 9                            |                        |                                 | 294                             | 2.4                         | 2                                     | 7.5                                   | 77.9                                                  |                              |                           |                                      |                                 | mixed diet    |
| 23.6                          | 11                                                 | 3                           | 8                            |                        |                                 | 210                             | 1                           | 4.9                                   | 12.8                                  |                                                       |                              |                           |                                      |                                 | mixed diet    |
| 24.8                          | 12                                                 | 3                           | 9                            |                        |                                 | 220                             |                             |                                       |                                       |                                                       |                              |                           |                                      |                                 | mixed diet    |
| 23.8                          | 13                                                 | 5                           | 8                            |                        |                                 | 227                             | 2.1                         | 2                                     | 7.7                                   | 40.8                                                  |                              |                           |                                      |                                 | mixed diet    |
| 25.9                          | 11                                                 | 5                           | 6                            |                        |                                 | 290                             |                             |                                       |                                       |                                                       |                              |                           |                                      |                                 | mixed diet    |
| 25.8                          | 10                                                 | 4                           | 6                            |                        |                                 | 259                             | 0.9                         | 17.8                                  | 7.3                                   |                                                       |                              |                           |                                      |                                 | mixed diet    |
| 30.3                          | 20                                                 | 6                           | 14                           |                        |                                 | 277                             | 1.4                         | 8.6                                   | 9.8                                   | 166.6                                                 |                              |                           |                                      |                                 | mixed diet    |
| 24.8                          | 16                                                 | 6                           | 10                           |                        |                                 | 157                             | null                        | null                                  | null                                  |                                                       |                              |                           |                                      |                                 | mixed diet    |
| 30.7                          | 14                                                 | 5                           | 9                            |                        |                                 | 224                             | 0.7                         | 11.6                                  | 5.6                                   |                                                       |                              |                           |                                      |                                 | mixed diet    |
| 25.1                          | 14                                                 | 5                           | 9                            |                        |                                 | 193                             | null                        | null                                  | null                                  |                                                       |                              |                           |                                      |                                 | mixed diet    |
| 22.7                          | 29                                                 | 11                          | 18                           |                        |                                 | 153                             | 1.6                         | 2                                     | 10.7                                  | null                                                  |                              |                           |                                      |                                 | mixed diet    |
| 27.9                          | 12                                                 | 4                           | 8                            |                        |                                 | 198                             | 1.3                         | 12.8                                  | 8.9                                   |                                                       |                              |                           |                                      |                                 | mixed diet    |
| 25                            | 14                                                 | 5                           | 9                            |                        |                                 | 213                             | 1.7                         | 4                                     | 5.4                                   |                                                       |                              |                           |                                      |                                 | mixed diet    |
| 23.5                          | 18                                                 | 5                           | 13                           |                        |                                 | 219                             | 0.9                         | 6.7                                   | 6.1                                   | null                                                  |                              |                           |                                      |                                 | mixed diet    |
| 30.7                          | 14                                                 | 5                           | 9                            |                        |                                 | 231                             | 0.7                         | 11.6                                  | 5.6                                   |                                                       |                              |                           |                                      |                                 | mixed diet    |
| 26.9                          | 9                                                  | 4                           | 5                            |                        |                                 | 193                             | 4.2                         | 21                                    | 8.7                                   | 66.5                                                  |                              |                           |                                      |                                 | mixed diet    |
| 24.3                          | 41                                                 | 15                          | 26                           |                        |                                 | 177                             | 1.5                         | 4                                     | 7.3                                   | 235.2                                                 |                              |                           |                                      |                                 | mixed diet    |
| 26.3                          | 18                                                 | 6                           | 12                           |                        |                                 | 200                             | 0.5                         | 4.2                                   | 2.4                                   | 171.9                                                 |                              |                           |                                      |                                 | mixed diet    |
| 25.3                          | 12                                                 | 4                           | 8                            |                        |                                 | 236                             | 3.6                         | 2.8                                   | 8.7                                   | 409.7                                                 |                              |                           |                                      |                                 | mixed diet    |
| 24.8                          | 18                                                 | 4                           | 14                           |                        |                                 | 176                             | 2.4                         | 3.7                                   | 10.3                                  |                                                       |                              |                           |                                      |                                 | mixed diet    |
| 23.3                          | 6                                                  | 3                           | 3                            |                        |                                 | 222                             | 1.1                         | 9.1                                   | 22                                    | 22.5                                                  | 5.6                          |                           |                                      |                                 | mixed diet    |
| 25.3                          | 13                                                 | 5                           | 8                            |                        |                                 | 198                             | 0.7                         | 9                                     | 6.2                                   | 233.1                                                 |                              |                           |                                      |                                 | mixed diet    |
| 27.8                          | 8                                                  | 4                           | 4                            |                        |                                 | 177                             | null                        | null                                  | null                                  | null                                                  |                              |                           |                                      |                                 | mixed diet    |
| 26.2                          | 15                                                 | 5                           | 10                           |                        |                                 | 223                             | 1.9                         | 3.9                                   |                                       |                                                       |                              |                           |                                      |                                 | mixed diet    |
| 26                            | 12                                                 | 4                           | 8                            |                        |                                 | 364                             | 2.9                         | 2                                     | 11.5                                  |                                                       |                              |                           |                                      |                                 | mixed diet    |
| 24.1                          | 11                                                 | 4                           | 7                            |                        |                                 | 215                             | 1.9                         | 6.4                                   | null                                  |                                                       |                              |                           |                                      |                                 | mixed diet    |
| 26.4                          | 16                                                 | 5                           | 11                           |                        |                                 | 257                             |                             |                                       |                                       |                                                       |                              |                           |                                      |                                 | mixed diet    |
| 20.3                          | 16                                                 | 5                           | 11                           |                        |                                 | 170                             | 0.7                         | 6.2                                   | 4.1                                   | 142.4                                                 |                              |                           |                                      |                                 | mixed diet    |
| 28.9                          | 16                                                 | 5                           | 11                           |                        |                                 | 109                             | 2.1                         | 8.1                                   | 13.3                                  | 315.7                                                 |                              |                           |                                      |                                 | mixed diet    |
| 28.3                          | 10                                                 | 4                           | 6                            |                        |                                 | 166                             | 1.8                         | 36.5                                  | 11.9                                  |                                                       |                              |                           |                                      |                                 | mixed diet    |
| 24                            | 19                                                 | 5                           | 14                           |                        |                                 | 184                             | 0.9                         | 10.8                                  | 9.3                                   | 240.9                                                 |                              |                           |                                      |                                 | mixed diet    |
| 30.1                          | 11                                                 | 4                           | 7                            |                        |                                 | 168                             | null                        | null                                  | null                                  |                                                       |                              |                           |                                      |                                 | mixed diet    |



|      |    |    |    |    |      |     |     |      |      |        |      |   |   |                       |
|------|----|----|----|----|------|-----|-----|------|------|--------|------|---|---|-----------------------|
| 26.9 | 23 | 8  | 15 | 12 | 409  | 105 | 4.1 | 15.2 | 12.8 | 225.2  |      | Y | Y | portal hyf mixed diet |
| 36.9 | 11 | 5  | 6  | 13 | 560  | 145 | 4.8 | 8    | 17.9 | 262.3  |      | Y | Y | chronic cl mixed diet |
| 41   | 28 | 13 | 15 | 14 | 918  | 97  | 6.7 | 3.2  | 18.4 | 19.7   |      | Y | Y | portal hyf mixed diet |
| 31.9 | 17 | 6  | 11 | 11 | 264  | 125 | 0.9 | 8.7  | 10.9 | 74.2   | 6.1  | Y | Y | hepatic cymixed diet  |
| 24.1 | 24 | 12 | 12 | 13 | 176  | 69  | 2.5 | 23.6 | 30.7 | 290.5  |      | Y | Y | N mixed diet          |
| 27.4 | 18 | 5  | 13 | 13 | 180  | 153 | 1.7 | 4.8  | 8.7  | 130.6  |      | Y | Y | N mixed diet          |
| 27.4 | 13 | 5  | 8  | 12 | 294  | 75  | 1.8 | 28.2 | 18.1 | 192.3  | 19.8 | Y | Y | N mixed diet          |
| 23.8 | 11 | 5  | 6  | 13 | 106  | 210 | 2   | 4.5  | 9.2  | 165    |      | Y | Y | N mixed diet          |
| 21.9 | 10 | 3  | 7  | 13 | 89   | 78  | 1.2 | 5.8  | 11.9 | 42.9   | 10.3 | Y | Y | renal cyst mixed diet |
| 32.4 | 23 | 7  | 14 | 13 | 202  | 119 | 3.7 | <2   | 9.8  | 301.6  |      | Y | Y | N mixed diet          |
| 23.4 | 20 | 10 | 10 | 12 | 109  | 175 | 3.4 | 6    | 8    | 183.5  |      | Y | Y | N mixed diet          |
| 29.4 | 17 | 7  | 10 | 13 | 372  | 77  | 5.2 | 16.2 | 31.4 | 36.6   |      | Y | Y | N mixed diet          |
| 31.4 | 26 | 10 | 16 | 12 | 50   | 125 | 2.7 | 11.3 | 11.7 | 277.4  |      | Y | Y | N mixed diet          |
| 28   | 18 | 7  | 11 | 12 | 30   | 203 | 1.2 | 2.1  | 4.3  | 176.5  |      | Y | Y | N mixed diet          |
| 27.3 | 14 | 7  | 7  | 11 | 220  | 199 | 9.2 | 53.8 | 8.1  | 347.3  |      | Y | Y | N mixed diet          |
| 28.3 | 14 | 5  | 9  | 12 | 130  | 153 | 1.5 | 3.4  | 10.2 | 107.8  |      | Y | Y | N mixed diet          |
| 26.1 | 22 | 9  | 13 | 11 | 208  | 279 | 1.7 | 23.2 | 9.2  | 276.6  |      | Y | Y | N mixed diet          |
| 31.1 | 11 | 7  | 4  | 16 | 1123 | 56  | 1.7 | 5.8  | 52.8 | 79.9   |      | Y | Y | portal hyf mixed diet |
| 26.6 | 11 | 5  | 6  | 13 | 145  | 103 | 1.2 | 6.2  | 31   | 427.2  |      | Y | Y | N mixed diet          |
| 36.1 | 44 | 11 | 33 | 16 | 1478 | 41  | 4.2 | 9.1  | 24.4 | 55.2   |      | Y | Y | portal hyf mixed diet |
| 29.5 | 24 | 8  | 16 | 12 | 246  | 206 | 3.4 | 7.4  | 4.4  | 257.3  |      | Y | Y | chronic cl mixed diet |
| 28.9 | 43 | 21 | 22 | 12 | 242  | 221 | 1.3 | 46.8 | 7.7  | 226.3  |      | Y | Y | N mixed diet          |
| 40   | 46 | 19 | 27 | 11 | 5151 | 91  | 0.6 | 9    | 34.6 | 577.4  |      | Y | Y | hepatic cymixed diet  |
| 30.6 | 21 | 8  | 13 | 15 | 1611 | 38  | 3   | 13.7 | 14.7 | 12.5   |      | Y | Y | N mixed diet          |
| 25.2 | 16 | 6  | 10 | 12 | 139  | 209 | 2.5 | 9.9  | 10.7 | 322.1  |      | Y | Y | chronic cl mixed diet |
| 22.5 | 36 | 18 | 18 | 12 | 208  | 125 | 3   | 7.5  | 5.8  | 89.4   |      | Y | Y | N mixed diet          |
| 28.5 | 9  | 4  | 5  | 12 | 89   | 101 | 7.7 | 9.7  | 4.4  | 166.6  |      | Y | Y | N mixed diet          |
| 26.7 | 13 | 3  | 10 | 13 | 254  | 141 | 1.6 | 4.9  | 6.2  | 517.6  |      | Y | Y | N mixed diet          |
| 28.8 | 8  | 3  | 5  | 11 | 482  | 150 | 2.3 | 7.7  | 21.4 | 503.5  |      | Y | Y | N mixed diet          |
| 25.5 | 23 | 12 | 11 | 12 | 260  | 137 | 2.3 | 15.6 | 6.7  | 475.7  |      | Y | Y | N mixed diet          |
| 24.5 | 13 | 5  | 8  | 11 | 121  | 164 | 1.9 | 5.3  | 22.3 | 208.5  |      | Y | Y | hepatic cymixed diet  |
| 28.9 | 10 | 2  | 8  | 11 | 358  | 201 | 0.9 | 9.9  | 10.9 | 230.8  |      | Y | Y | N mixed diet          |
| 24.8 | 11 | 4  | 7  | 13 | 191  | 111 | 1.6 | 2    | 8.4  | 166.2  |      | Y | Y | N mixed diet          |
| 23.5 | 25 | 12 | 13 | 12 | 176  | 116 | 1.7 | 12.2 | 8.1  | 270.1  |      | Y | Y | chronic cl mixed diet |
| 24.1 | 33 | 17 | 16 | 14 | 958  | 43  | 2   | 8.5  | 7.3  | 113.9  |      | Y | Y | N mixed diet          |
| 29.3 | 21 | 7  | 13 | 15 | 236  | 71  | 3.8 | 76.4 | 29.6 | 367    |      | Y | Y | hepatic cymixed diet  |
| 25.6 | 13 | 4  | 9  | 13 | 220  | 58  | 2.2 | 2    | 7.6  | 72.4   |      | Y | Y | portal hyf mixed diet |
| 25.8 | 24 | 10 | 14 | 14 | 199  | 138 | 1.1 | 2.5  | 4.1  | 168.3  | 10.1 | Y | Y | hepatic cymixed diet  |
| 30.6 | 9  | 4  | 5  | 13 | 46   | 159 | 1.1 | 6.2  | 4.3  | 533.7  |      | Y | Y | N mixed diet          |
| 25.3 | 11 | 5  | 6  | 11 | 380  | 128 | 4.6 | 11.2 | 4.7  | 427.3  |      | Y | Y | N mixed diet          |
| 33.2 | 10 | 5  | 5  | 13 | 28   | 312 | 3.8 | <2   | 11.9 | 1129.2 |      | Y | Y | N mixed diet          |
| 28.3 | 24 | 9  | 15 | 14 | 572  | 75  | 1.8 | 102  | 11.2 | 31.3   |      | Y | Y | N mixed diet          |
| 20.6 | 4  | 2  | 2  | 12 | 147  | 147 | 1.5 | <2   | 10.6 | 174.2  |      | Y | Y | N mixed diet          |
| 33.9 | 13 | 5  | 8  | 12 | 391  | 143 | 0.8 | <2   | 13.2 | 76.5   |      | Y | Y | chronic cl mixed diet |
| 33.5 | 27 | 10 | 17 | 13 | 470  | 83  | 2.8 | 13.1 | 17.8 | 81.9   |      | Y | Y | N mixed diet          |
| 40.8 | 8  | 3  | 5  | 11 | 1272 | 201 | 3.9 | 26.5 | 6.7  | 204.5  |      | Y | Y | N mixed diet          |
| 26.1 | 19 | 8  | 11 | 12 | 2716 | 74  | 1.5 | 7.4  | 5.9  | 190.8  |      | Y | Y | N mixed diet          |
| 30   | 8  | 4  | 4  | 10 | 96   | 184 | 1.5 | 4.9  | 7.1  | 118.1  |      | Y | Y | N mixed diet          |
| 33.7 | 9  | 3  | 6  | 17 | 980  | 99  | 3.8 | 7.7  | 15.9 | 212.3  |      | Y | Y | portal hyf mixed diet |
| 24.4 | 21 | 10 | 11 | 13 | 194  | 45  | 3.4 | 6    | 8    | 193.5  |      | Y | Y | N mixed diet          |
| 28.8 | 10 | 4  | 6  | 13 | 594  | 94  | 1.9 | 22.8 | 15.9 | 235.9  | 15.5 | Y | Y | N mixed diet          |
| 23.5 | 8  | 3  | 5  | 13 | 490  | 128 | 2.2 | 19   | 25.6 | 145    |      | Y | Y | chronic cl mixed diet |
| 23   | 12 | 4  | 8  | 14 |      | 220 | 1.8 | 14.2 | 19.6 | 264.1  | 16   | Y | Y | N mixed diet          |
| 21   | 13 | 5  | 8  | 14 |      | 197 | 1.9 | 22.8 | 18.9 | 65     |      | Y | Y | N mixed diet          |



|      |    |    |    |      |     |      |      |      |       |      |   |   |             |            |
|------|----|----|----|------|-----|------|------|------|-------|------|---|---|-------------|------------|
| 28.8 | 16 | 3  | 13 | 13   | 270 | 4.3  | 9.3  | 20.1 | 142.3 | 16   | Y | Y | N           | mixed diet |
| 27.8 | 12 | 3  | 9  | 14   | 257 | 5.2  | 4    | 17.7 | 30.8  |      | Y | Y | N           | mixed diet |
| 26.7 | 20 | 7  | 13 | 12   | 294 | 3.4  | 5    | 17.5 | 87.9  |      | Y | Y | N           | mixed diet |
| 27.4 | 15 | 4  | 11 | 12   | 213 | 1.2  | 6.7  | null | 62.7  |      | Y | Y | N           | mixed diet |
| 23   | 5  | 3  | 2  | null | 176 | 1.8  | 31.5 | 10.9 | 176.6 | 17   | Y | Y | N           | mixed diet |
| 25   | 30 | 11 | 19 | 13   | 268 | 6.7  | 11.5 | null | 201.8 |      | Y | Y | N           | mixed diet |
| 29.3 | 7  | 3  | 4  | null | 235 | 1.7  | 31.6 | 21.6 | 227.3 |      | Y | Y | chronic cl  | mixed diet |
| 26.8 | 13 | 6  | 7  | 13   | 190 | 2.5  | 15.7 | 23   | 182.6 |      | Y | Y | chronic cl  | mixed diet |
| 22.1 | 20 | 7  | 13 | 13   | 216 | 2.7  | 5.5  | 18.2 | 249.4 |      | Y | Y | N           | mixed diet |
| 31.3 | 15 | 8  | 7  | 12   | 329 | 2.1  | 6.5  | 18.1 | 49    |      | Y | Y | N           | mixed diet |
| 23.9 | 13 | 5  | 8  | 12   | 189 | 1.6  | 16.7 | 24.9 | 79    | 12   | Y | Y | N           | mixed diet |
| 31.8 | 8  | 3  | 5  | 12   | 218 | 1.8  | 27.3 | 20.5 | 93.4  | 22   | Y | Y | renal cyst  | mixed diet |
| 23.5 | 17 | 7  | 10 | 12   | 231 | 1.7  | 12.6 | 15.6 | 122.2 | 13.5 | Y | Y | N           | mixed diet |
| 26.8 | 13 | 3  | 10 | 14   | 278 | 4.8  | 5    | 17.1 | 233.7 |      | Y | Y | hepatic cym | mixed diet |
| 25.8 | 15 | 4  | 11 | 14   | 361 | 5.1  | 16.4 | 24.7 | 180.7 |      | Y | Y | N           | mixed diet |
| 24.7 | 15 | 5  | 10 | 13   | 228 | 2.7  | 21.6 | 15.6 | 100.4 | 23   | Y | Y | N           | mixed diet |
| 258  | 18 | 8  | 10 | 12   | 239 | 1.7  | 2.9  | 13.2 | 104.3 |      | Y | Y | N           | mixed diet |
| 22.3 | 12 | 7  | 5  | 12   | 251 | 2.9  | 8.9  | 17.9 | null  |      | Y | Y | N           | mixed diet |
| 34.2 | 18 | 8  | 10 | 14   | 259 | 3.1  | 23.3 | 21.5 | null  |      | Y | Y | portal hyp  | mixed diet |
| 27.9 | 11 | 2  | 9  | 12   | 354 | 2.9  | 3    | 15.5 | 87.8  | 20.1 | Y | Y | N           | mixed diet |
| 26.5 | 19 | 6  | 13 | 14   | 255 | 2.5  | 8.9  | 17.5 | 99.5  |      | Y | Y | N           | mixed diet |
| 23.3 | 7  | 4  | 3  | 12   | 223 | 9.2  | 6.9  | null | 104.1 |      | Y | Y | N           | mixed diet |
| 25.9 | 17 | 7  | 10 | 14   | 229 | 2.3  | 23   | 15.9 | 92.9  | 25   | Y | Y | N           | mixed diet |
| 23   | 11 | 3  | 8  | null | 188 | 1.8  | 5.9  | 20.1 | 191.6 | 18   | Y | Y | N           | mixed diet |
| 20.5 | 21 | 9  | 12 | 13   | 207 | 3.2  | 6.5  | 22.4 | 126.7 |      | Y | Y | N           | mixed diet |
| 26.1 | 12 | 3  | 9  | 13   | 228 | 1.9  | 17.9 | 13.5 | 81.3  | 16   | Y | Y | renal cyst  | mixed diet |
| 22.5 | 15 | 5  | 10 | 13   | 277 | 2.1  | 22.3 | 12.5 | 116   |      | Y | Y | N           | mixed diet |
| 23.7 | 30 | 11 | 19 | 14   | 233 | 1.2  | 7.5  | 15.8 | 99    |      | Y | Y | N           | mixed diet |
| 24.3 | 21 | 4  | 17 | 12   | 252 | 7.1  | 9.6  | 12   | 132.5 |      | Y | Y | N           | mixed diet |
| 24   | 16 | 4  | 12 | 13   | 221 | 2    | 8.8  | 29.1 | 76.6  |      | Y | Y | renal cyst  | mixed diet |
| 31.7 | 25 | 5  | 20 | null | 348 | 4.6  | 15.8 | 15.6 | 79.3  | 8    | Y | Y | N           | mixed diet |
| 24   | 13 | 5  | 8  | 14   | 270 | 1.8  | 17.3 | 26.9 | 153.7 | 21   | Y | Y | N           | mixed diet |
| 26.3 | 10 | 3  | 7  | 13   | 127 | 2.5  | 13.2 | 24.7 | 32.9  | 21   | Y | Y | N           | mixed diet |
| 23.5 | 14 | 3  | 11 | 13   | 319 | 3.5  | 3    | 18.5 | null  |      | Y | Y | N           | mixed diet |
| 27   | 14 | 3  | 11 | null | 278 | 2    | 8.6  | 19.8 | 116.6 |      | Y | Y | chronic cl  | mixed diet |
| 23   | 19 | 4  | 15 | 13   | 253 | 2.4  | 15.1 | 6.6  | 103   | 18   | Y | Y | N           | mixed diet |
| 32   | 69 | 32 | 37 | 13   | 217 | 2.7  | 19.3 | 17.6 | 99.3  |      | Y | Y | N           | mixed diet |
| 22.8 | 13 | 5  | 8  | 15   | 239 | 5.4  | 6.6  | null | 241   |      | Y | Y | N           | mixed diet |
| 20.9 | 21 | 5  | 16 |      | 240 | 1.3  | 9.2  | 10.1 |       |      |   |   |             | mixed diet |
| 24.6 | 10 | 3  | 7  |      | 157 | 5.3  | 24.8 | 13.2 |       |      |   |   |             | mixed diet |
| 26   | 10 | 4  | 6  |      | 234 | 1.8  | 2    | 5.8  |       |      |   |   |             | mixed diet |
| 27.2 | 13 | 4  | 9  |      | 257 | 2.2  | 24.3 | 11.5 |       |      |   |   |             | mixed diet |
| 23.3 | 6  | 3  | 3  |      | 222 | 1.1  | 9.1  | 22   | 22.5  | 5.6  |   |   |             | mixed diet |
| 27.7 | 9  | 3  | 6  |      | 344 | 0.6  | 11.8 | 13.6 | 54.6  | 7.3  |   |   |             | mixed diet |
| 28.4 | 12 | 5  | 7  |      | 215 | 1.4  | 27.5 | 11.6 | 52.9  | 16.2 |   |   |             | mixed diet |
| 23.2 | 11 | 4  | 7  |      | 181 | 1.3  | 3.9  | 10.1 |       |      |   |   |             | mixed diet |
| 24   | 16 | 5  | 11 |      | 161 | 2    | 6.9  | 5.1  |       |      |   |   |             | mixed diet |
| 26.5 | 8  | 2  | 6  |      | 287 |      |      |      |       |      |   |   |             | mixed diet |
| 19.3 | 7  | 3  | 4  |      | 151 | null | null | null | null  |      |   |   |             | mixed diet |
| 27.7 | 7  | 2  | 5  |      | 377 |      |      |      |       |      |   |   |             | mixed diet |
| 29.8 | 11 | 4  | 7  |      | 158 | 2.1  | 13.5 | 10.1 |       |      |   |   |             | mixed diet |
| 25.7 | 22 | 8  | 14 |      | 203 | 1.8  | 6.1  | null |       |      |   |   |             | mixed diet |
| 24   | 11 | 3  | 8  |      | 220 | 1.7  | 2.6  | 8.3  |       |      |   |   |             | mixed diet |



|      |     |     |    |    |      |     |      |      |      |       |      |   |            |            |            |
|------|-----|-----|----|----|------|-----|------|------|------|-------|------|---|------------|------------|------------|
| 23.8 | 11  | 5   | 6  | 12 | 5910 | 156 | 2    | 4.5  | 10.2 | 185   | N    | Y | chronic cl | mixed diet |            |
| 20.9 | 10  | 2   | 8  | 19 | 180  | 50  | 2.6  | 37.5 | 18.6 | 462.1 | N    | Y | N          | mixed diet |            |
| 29.1 | 13  | 5   | 8  | 12 | 109  | 159 | 2    | 15.7 | 17   | 229.6 | N    | Y | N          | mixed diet |            |
| 28   | 27  | 10  | 17 | 11 | 185  | 143 | 1.7  | 58.5 | 8.6  | 87.2  | 6    | N | Y          | N          | mixed diet |
| 25.7 | 12  | 4   | 8  | 12 | 430  | 181 | 4.1  | 9    | 4.3  | 472   | N    | Y | chronic cl | mixed diet |            |
| 27.1 | 11  | 5   | 6  | 12 | 220  | 118 | 1.5  | 19   | 92.7 | 85.9  | N    | Y | N          | mixed diet |            |
| 33.4 | 13  | 6   | 7  | 12 | 398  | 217 | 1.1  | 23.5 | 21.5 | 69.3  | 14.9 | N | Y          | N          | mixed diet |
| 29.3 | 8   | 4   | 4  | 11 | 340  | 155 | 5.8  | 5.5  | 4    | 280.7 | N    | Y | N          | mixed diet |            |
| 21.4 | 14  | 5   | 9  | 11 | 740  | 186 | 58.8 | 6.4  | 7.1  | 159   | N    | Y | chronic cl | mixed diet |            |
| 25.2 | 18  | 7   | 11 | 11 | 63   | 327 | 1.7  | 6.9  | 7.6  | 270.8 | N    | N | N          | mixed diet |            |
| 26.2 | 7   | 2   | 5  | 11 | 178  | 169 | 2.4  | 15.1 | 10.2 | 287.7 | N    | Y | N          | mixed diet |            |
| 24.4 | 9   | 3   | 6  | 12 | 175  | 261 | 1.2  | 6.3  | 8.8  | 86.6  | N    | N | N          | mixed diet |            |
| 30.5 | 20  | 7   | 13 | 11 | 225  | 128 | 3    | 4.6  | 29.9 | 379.2 | N    | Y | N          | mixed diet |            |
| 27.5 | 21  | 8   | 13 | 12 | 188  | 150 | 0.9  | 5.2  | 7.3  | 74.7  | N    | Y | renal cyst | mixed diet |            |
| 29.9 | 9   | 4   | 5  | 11 | 553  | 197 | 2.6  | 4.5  | 35.7 | 192.8 | N    | N | N          | mixed diet |            |
| 25.5 | 14  | 7   | 7  | 12 | 264  | 64  | 3.9  | 26.5 | 4.6  | 75.2  | N    | Y | N          | mixed diet |            |
| 32   | 13  | 4   | 9  | 11 | 106  | 222 | 1.2  | 3.3  | 9.1  | 187.9 | N    | N | N          | mixed diet |            |
| 25.4 | 20  | 8   | 12 | 11 | 209  | 117 | 3.1  | 27.9 | 7.7  | 129.9 | N    | Y | N          | mixed diet |            |
| 27.3 | 35  | 12  | 23 | 12 | 360  | 154 | 1.8  | 10.8 | 5.1  | 203.1 | N    | N | N          | mixed diet |            |
| 32.1 | 20  | 11  | 9  | 12 | 121  | 134 | 2.4  | 10   | 137  | 825.8 | Y    | Y | N          | mixed diet |            |
| 25.8 | 15  | 6   | 9  | 11 | 961  | 177 | 4.7  | 37.6 | 17.8 | 267.4 | Y    | Y | N          | mixed diet |            |
| 48.3 | 14  | 6   | 8  | 10 | 1451 | 208 | 1.4  | 1039 | 15.3 | 531.4 | Y    | Y | N          | mixed diet |            |
| 24.4 | 5   | 2   | 3  | 12 | 94   | 163 | 1.6  | 11   | 14.8 | 558   | Y    | Y | N          | mixed diet |            |
| 22.1 | 33  | 17  | 16 | 13 | 520  | 124 | 2.7  | 3.5  | 53.9 | 685.3 | Y    | Y | hepatic cy | mixed diet |            |
| 23.3 | 8   | 3   | 5  | 11 | 320  | 215 | 2.9  | 9.8  | 5.7  | 99.1  | Y    | Y | chronic cl | mixed diet |            |
| 36.2 | 15  | 3   | 12 | 12 | 236  | 195 | 1.6  | 8.7  | 11.1 | 894.5 | Y    | Y | N          | mixed diet |            |
| 26.6 | 19  | 10  | 9  | 12 | 444  | 204 | 4.3  | 15   | 14.5 | 215.3 | Y    | Y | Spleen ca  | mixed diet |            |
| 30.3 | 16  | 7   | 9  | 14 | 1726 | 36  | 2.8  | 13.8 | 24   | 888.1 | Y    | Y | kidney stc | mixed diet |            |
| 28.9 | 10  | 4   | 6  | 12 | 284  | 270 | 3.1  | 2    | 17.8 | 103.8 | N    | Y | N          | mixed diet |            |
| 33.5 | 25  | 11  | 14 | 13 | 46   | 81  | 4.6  | 55.6 | 67.8 | 166.7 | Y    | Y | N          | mixed diet |            |
| 25.7 | 23  | 9   | 14 | 12 | 440  | 106 | 1.6  | 8.4  | 17.9 | 280.6 | Y    | Y | chronic cl | mixed diet |            |
| 35.6 | 8   | 3   | 5  | 12 | 830  | 103 | 6.2  | 37.7 | 29   | 200.4 | 13.7 | Y | Y          | chronic cl | mixed diet |
| 25.5 | 15  | 6   | 9  | 11 | 399  | 193 | 3.3  | 8.7  | 108  | 61.9  | Y    | Y | hepatic cy | mixed diet |            |
| 29.1 | 15  | 8   | 7  | 13 | 1353 | 219 | 2.1  | 875  | 9.5  | 322.2 | Y    | Y | renal cyst | mixed diet |            |
| 27.2 | 31  | 21  | 10 | 10 | 1186 | 158 | 1.3  | 20.2 | 27.9 | 459.5 | Y    | Y | N          | mixed diet |            |
| 30   | 24  | 15  | 9  | 13 | 3091 | 211 | 6.3  | 124  | 19.8 | 166.7 | Y    | Y | portal hy  | mixed diet |            |
| 22.2 | 23  | 10  | 13 | 13 | 573  | 87  | 1    | 5    | 12.4 | 141   | Y    | Y | chronic cl | mixed diet |            |
| 28.6 | 14  | 6   | 8  | 12 | 1224 | 217 | 2    | 5.3  | 35.1 | 464.1 | Y    | Y | N          | mixed diet |            |
| 25.7 | 10  | 4   | 6  | 12 | 248  | 129 | 1.4  | 5.2  | 9.8  | 282.6 | N    | Y | N          | mixed diet |            |
| 26   | 17  | 8   | 9  | 13 | 1015 | 159 | 2    | 28.4 | 104  | 164.3 | Y    | Y | N          | mixed diet |            |
| 29.3 | 355 | 264 | 91 | 17 | 340  | 284 | 3.5  | 309  | 29.8 | 749.4 | N    | Y | N          | mixed diet |            |
| 21.9 | 13  | 5   | 8  | 11 | 279  | 486 | 1.1  | <2   | 15   | 221.8 | N    | N | N          | mixed diet |            |
| 26   | 27  | 12  | 15 | 13 | 421  | 80  | 4.7  | 19.3 | 16.2 | 32.5  | Y    | Y | portal hy  | mixed diet |            |
| 27.1 | 22  | 8   | 14 | 11 | 630  | 100 | 4    | 7.4  | 7.4  | 262.7 | N    | Y | N          | mixed diet |            |
| 29.2 | 15  | 6   | 9  | 12 | 400  | 221 | 1.6  | 11.1 | 10.2 | 204.1 | N    | Y | N          | mixed diet |            |
| 25.9 | 31  | 13  | 19 | 12 | 157  | 49  | 1.4  | <2   | 11.1 | 157.7 | Y    | Y | N          | mixed diet |            |
| 31.4 | 19  | 7   | 12 | 11 | 538  | 189 | 1.9  | 7.7  | 11.3 | 175.3 | N    | Y | chronic cl | mixed diet |            |
| 35.1 | 38  | 20  | 18 | 14 | 576  | 61  | 3.9  | 4.3  | 8.5  | 184.3 | Y    | Y | portal hy  | mixed diet |            |
| 29.9 | 12  | 4   | 8  | 10 | 2069 | 326 | 2.6  | 4.6  | 5.8  | 370   | N    | N | N          | mixed diet |            |
| 26.3 | 7   | 2   | 5  | 11 | 150  | 207 | 1.5  | 8.3  | 6.8  | 345.7 | Y    | Y | N          | mixed diet |            |
| 32.6 | 12  | 5   | 7  | 12 | 80   | 138 | 2.5  | 3.4  | 6.8  | 962.3 | Y    | Y | N          | mixed diet |            |
| 31.5 | 16  | 7   | 9  | 12 | 3215 | 181 | 1.5  | 27.8 | 86.9 | 610.6 | Y    | Y | N          | mixed diet |            |
| 21.4 | 13  | 4   | 9  | 12 | 270  | 186 | 1.4  | 23   | 59.6 | 523.1 | N    | N | N          | mixed diet |            |

|       |       |     |      |    |      |     |      |      |      |       |      |   |            |            |            |
|-------|-------|-----|------|----|------|-----|------|------|------|-------|------|---|------------|------------|------------|
| 26.4  | 20    | 10  | 10   | 11 | 181  | 100 | 2.1  | 2.3  | 7.9  | 328.2 | Y    | Y | portal hy  | mixed diet |            |
| 26    | 15    | 5   | 10   | 10 | 70   | 271 | 2.2  | 15.9 | 18.6 | 55    | 7.5  | Y | N          | chronic cl | mixed diet |
| 30.4  | 21    | 8   | 13   | 12 | 1040 | 120 | 2.2  | 10.6 | 56.9 | 818.2 | Y    | Y | N          | mixed diet |            |
| 29.6  | 11    | 4   | 7    | 13 | 244  | 61  | 1.2  | 2.6  | 6.6  | 311.3 | Y    | Y | N          | mixed diet |            |
| 32.2  | 9     | 4   | 5    | 13 | 815  | 149 | 3.3  | 11.5 | 6.7  | 256.5 | N    | N | N          | mixed diet |            |
| 24.6  | 13    | 5   | 8    | 11 | 690  | 216 | 3.3  | 13.7 | 8.2  | 454.1 | Y    | Y | Multiple   | mixed diet |            |
| 42.5  | 9     | 4   | 5    | 13 | 2202 | 314 | 0.9  | 12.5 | 20.6 | 704.6 | Y    | Y | hepatic dt | mixed diet |            |
| 25.7  | 23    | 9   | 14   | 12 | 440  | 106 | 1.6  | 8.4  | 17.9 | 280.6 | Y    | Y | N          | mixed diet |            |
| 30.3  | 8     | 3   | 5    | 13 | 426  | 165 | 2.1  | 8.1  | 9.9  | 238.1 | Y    | Y | N          | mixed diet |            |
| 27.8  | 8     | 4   | 4    | 10 | 595  | 208 | 3.4  | 26.2 | 20.3 | 257.4 | Y    | N | N          | mixed diet |            |
| 30.9  | 17    | 9   | 8    | 12 | 2040 | 166 | 5.2  | 14.7 | 9    | 242.8 | Y    | Y | N          | mixed diet |            |
| 41.3  | 16.87 | 5.7 | 11.2 | 15 | ND   | 802 | >100 | 548  | 63.7 | ND    | ND   | N | N          | chronic cl | mixed diet |
| 23.64 | 10.39 | 1   | 6.19 | 13 | 146  | 299 | 0.84 | 2.37 | 2.27 | ND    | 12   | N | Y          | Asthma, l  | mixed diet |
| 44.1  | 11.25 | 2.3 | 7.32 | 15 | ND   | 222 | 3.16 | 2.73 | 98.1 | 265   | ND   | Y | N          | esophage;  | mixed diet |
| 21.81 | 8.42  | 7.9 | 1.53 | 16 | ND   | 79  | 1.5  | 37.3 | 11.3 | 79    | ND   | Y | Y          | chronic cl | mixed diet |
| 32.9  | 8.87  | 1.2 | 7.58 | 11 | 515  | 299 | >100 | 6.31 | 22.3 | 256   | ND   | N | N          | hypertens  | mixed diet |
| 29.68 | 13.85 | 8.4 | 2.26 | 14 | 268  | 134 | 2.49 | 28.4 | 42.4 | 69    | ND   | Y | Y          | hypertens  | mixed diet |
| 30.5  | 4     | 2.5 | 1.5  | 12 | ND   | 202 | 1.17 | 3.57 | 5.7  | 116   | ND   | N | Y          | N          | mixed diet |
| 39.4  | 39.16 | 9.9 | 29.3 | 13 | ND   | 214 | 2.4  | 24   | 211  | 89    | ND   | Y | N          | chronic cl | mixed diet |
| 19.92 | 14.61 | 5.3 | 9.35 | 13 | ND   | 172 | 0.59 | 10.2 | 10.3 | ND    | ND   | N | Y          | chronic cl | mixed diet |
| 38    | 14.4  | 7.6 | 6.8  | 14 | 120  | 90  | 1.48 | 26.7 | 9.4  | 96    | ND   | Y | Y          | chronic cl | mixed diet |
| 28.2  | 140.8 | 92  | 49.1 | 13 | ND   | 248 | 2.08 | >700 | 172  | 87    | 16.8 | Y | Y          | acute cho  | mixed diet |
| 35.4  | 22.43 | 8.9 | 13.6 | 14 | ND   | 260 | 0.97 | 20.3 | 86.3 | 95    | ND   | Y | Y          | chronic cl | mixed diet |
| 31.4  | 19.9  | 14  | 5.9  | 13 | 488  | 177 | 1.22 | 31.8 | 30.9 | 89    | ND   | N | N          | chronic cl | mixed diet |
| 34.7  | 124.8 | 87  | 37.6 | 13 | ND   | 132 | 0.74 | 39.8 | 24.2 | 68    | ND   | Y | Y          | acute cho  | mixed diet |
| 36.8  | 17.7  | 3.2 | 14.5 | 12 | 5606 | 343 | >100 | 9.05 | 90.2 | ND    | ND   | N | N          | hypertens  | mixed diet |
| 28.79 | 8.98  | 3.5 | 5.51 | 11 | 132  | 103 | ND   | ND   | ND   | ND    | ND   | Y | Y          | N          | mixed diet |
| 40.2  | 19.1  | 9.4 | 9.7  | 14 | ND   | 75  | 2.15 | 465  | 144  | 76    | ND   | N | Y          | N          | mixed diet |
| 40.2  | 19.1  | 9.4 | 9.7  | 14 | ND   | 75  | 2.15 | 465  | 144  | ND    | ND   | N | Y          | N          | mixed diet |
| 30.3  | 290.6 | 255 | 35.3 | 15 | 1.37 | 196 | 4.18 | 309  | 40.3 | 3167  | 11.3 | Y | Y          | N          | mixed diet |
| 38    | 112   | 56  | 56   | 13 | 2    | 34  | 23   | 43   | 33   | ND    | ND   | Y | Y          | N          | mixed diet |
| 35.7  | 18.6  | 8.8 | 9.8  | 25 | 0.07 | 295 | 2.41 | 11.8 | 31.4 | ND    | ND   | Y | Y          | portal hy  | mixed diet |
| 35.2  | 16.5  | 10  | 6.5  | 14 | 0.22 | 35  | ND   | ND   | ND   | ND    | ND   | Y | Y          | N          | mixed diet |
| 27.6  | 8.2   | 4.2 | 4    | 10 | 0.05 | 181 | 0.99 | 14   | 7.8  | ND    | ND   | Y | N          | N          | mixed diet |
| 26.9  | 9.9   | 5.1 | 4.8  | 11 | 0.08 | 193 | 1.4  | 7.5  | 9.8  | 185   |      | N | Y          | N          | mixed diet |
| 27.3  | 14.3  | 6   | 8.3  | 11 | 0.17 | 111 | 2    | 28.4 | 104  | 324   |      | Y | Y          | N          | mixed diet |
| 35    | 147.8 | 65  | 35.8 | 16 | 5.21 | 146 | 5    | 65   | 34   | 32    | 112  | Y | Y          | ascites    | mixed diet |
| 34.9  | 18.1  | 12  | 5.8  | 12 | 3.65 | 301 | ND   | ND   | ND   | ND    | ND   | Y | Y          | portal hy  | mixed diet |
| 44.5  | 14.3  | 7.6 | 6.7  | 13 | 0.35 | 86  | ND   | 88.9 | 18.6 | ND    | ND   | Y | Y          | N          | mixed diet |
| 44.5  | 14.3  | 7.6 | 6.7  | 13 | 0.35 | 86  | ND   | 88.9 | 18.6 | ND    | ND   | Y | Y          | N          | mixed diet |
| 28.2  | 24.6  | 13  | 12   | 17 | 2.48 | 70  | 3.4  | 24   | 774  | 35.65 | 34.9 | Y | Y          | N          | mixed diet |
| 24.9  | 4.3   | 2.7 | 1.6  | 11 | 0.09 | 205 | 0.63 | 4.56 | 19.6 | ND    | ND   | Y | Y          | N          | mixed diet |
| 23.7  | 45.5  | 34  | 11.7 | 10 | 2.02 | 111 | ND   | ND   | ND   | ND    | ND   | Y | N          | N          | mixed diet |
| 23.6  | 3.9   | 1.5 | 2.4  | 10 | 0.22 | 168 | 5.78 | 989  | 22   | ND    | ND   | N | Y          | N          | mixed diet |
| 30    | 90    | 35  | 55   | 11 | 0.14 | 65  | 2.7  | 0.6  | 19.6 | ND    | ND   | N | N          | N          | mixed diet |
| 40.6  | 41    | 26  | 14.8 | 12 | 0.71 | 102 | 0.83 | 24.9 | 55   | ND    | ND   | Y | Y          | ascites    | mixed diet |
| 32.9  | 79.7  | 55  | 24.5 | 15 | 0.38 | 177 | ND   | ND   | ND   | ND    | ND   | Y | Y          | ascites    | mixed diet |
| 23.7  | 24.2  | 14  | 10.7 | 12 | 1.22 | 60  | 5.17 | 14.7 | 39.8 | ND    | ND   | Y | Y          | PVTT, pc   | mixed diet |
| 20.8  | 15.2  | 6.5 | 8.7  | 12 | 0.51 | 132 | ND   | ND   | ND   | ND    | ND   | Y | Y          | N          | mixed diet |
| 23.7  | 13.6  | 8.6 | 5    | 11 | 0.75 | 479 | 1.7  | 41.4 | 96.6 | ND    | ND   | N | N          | ascites    | mixed diet |

|      |       |     |      |     |      |     |       |      |      |       |      |   |   |             |            |
|------|-------|-----|------|-----|------|-----|-------|------|------|-------|------|---|---|-------------|------------|
| 37   | 22    | 11  | 11   | 11  | 0.05 | 189 | ND    | ND   | ND   | ND    | ND   | N | Y | N           | mixed diet |
| 35   | 24    | 15  | 9    | 13  | 0.56 | 67  | ND    | ND   | ND   | ND    | ND   | Y | Y | N           | mixed diet |
| 23.3 | 22    | 14  | 8.5  | 14  | 0.14 | 6   | ND    | ND   | ND   | ND    | ND   | Y | N | N           | mixed diet |
| 30.8 | 10.8  | 5   | 5.8  | 10  | 0.77 | 188 | 9.26  | 4517 | 42   | ND    | ND   | N | N | N           | mixed diet |
| 27.6 | 15.2  | 6.2 | 9    | 11  | 0.45 | 119 | 3.44  | 0.6  | 24.2 | ND    | ND   | Y | Y | portal vei  | mixed diet |
| 23.6 | 15.2  | 7.7 | 7.5  | 14  | 0.25 | 38  | ND    | ND   | ND   | ND    | ND   | Y | Y | ascites     | mixed diet |
| 19.2 | 10.8  | 3.5 | 7.3  | 11  | 0.04 | 144 | ND    | ND   | ND   | ND    | ND   | Y | Y | ascites     | mixed diet |
| 32.1 | 55.1  | 34  | 21.4 | 1.2 | 13   | 116 | 1.301 | 30.6 | 114  | ND    | ND   | Y | N | ascites     | mixed diet |
| 25.9 | 100.9 | 88  | 12.5 | 13  | 0.79 | 347 | ND    | ND   | ND   | ND    | ND   | N | Y | ascites     | mixed diet |
| 45.6 | 4.2   | 1.7 | 2.5  | 10  | 0.16 | 180 | 2.121 | 11.1 | 30.2 | ND    | ND   | N | N | N           | mixed diet |
| 27.2 | 10    | 5   | 5    | 11  | 2.19 | 291 | 10.9  | #### | 155  | ND    | ND   | N | N | N           | mixed diet |
| 23   | 14    | 6.6 | 7.4  | 12  | 0.28 | 148 | 4.48  | 24.3 | 14.2 | 48.05 | 7.75 | Y | Y | N           | mixed diet |
| 29.5 | 13.6  | 8.1 | 5.5  | 15  | 0.06 | 28  | 4.098 | 28.3 | 12.9 | ND    | 7.12 | Y | Y | PVTT, pc    | mixed diet |
| 21.3 | 14.7  | 7.8 | 6.9  | 12  | 0.6  | 75  | 3.28  | 57.5 | 74.1 | ND    | ND   | Y | Y | ascites     | mixed diet |
| 25.1 | 5.4   | 3.1 | 2.3  | 12  | 0.35 | 295 | ND    | ND   | ND   | ND    | ND   | N | N | N           | mixed diet |
| 15.9 | 20.2  | 11  | 8.8  | 14  | 0.12 | 33  | ND    | ND   | ND   | ND    | ND   | Y | Y | N           | mixed diet |
| 30.9 | 16.4  | 8   | 8.4  | 10  | 0.13 | 52  | ND    | ND   | ND   | ND    | ND   | Y | Y | ascites     | mixed diet |
| 29.4 | 13.3  | 5.6 | 7.7  | 11  | 0.09 | 142 | 2.53  | 10.8 | 6.79 | 60.75 | 7.12 | Y | Y | N           | mixed diet |
| 29.2 | 21.3  | 18  | 3.6  | 11  | 0.53 | 198 | ND    | ND   | ND   | ND    | ND   | Y | Y | ascites     | mixed diet |
| 40.3 | 18.1  | 12  | 6.1  | 14  | 0.32 | 165 | 3.14  | 226  | 119  | ND    | ND   | Y | Y | ascites     | mixed diet |
| 19   | 9.3   | 5.4 | 3.9  | 12  | 0.02 | 117 | 3.94  | 13.2 | 10.4 | ND    | ND   | Y | Y | N           | mixed diet |
| 22.1 | 12    | 6.3 | 5.7  | 9.6 | 0.11 | 157 | 3.77  | 25.3 | 11.3 | ND    | ND   | N | Y | N           | mixed diet |
| 28.1 | 8.3   | 3.8 | 4.5  | 10  | 0.56 | 52  | 2.62  | 85.1 | 68.1 | 497.3 | 12.1 | Y | Y | N           | mixed diet |
| 33.3 | 17.5  | 16  | 2    | 14  | 3.39 | 115 | 1.55  | 21.8 | 250  | ND    | ND   | Y | Y | ascites     | mixed diet |
| 28.3 | 13.4  | 6.5 | 6.9  | 12  | 0.1  | 80  | 1.49  | 7.05 | 5.96 | 283.8 | 9.64 | Y | Y | N           | mixed diet |
| 21.1 | 14.5  | 7.9 | 6.6  | 11  | 0.06 | 109 | ND    | ND   | ND   | ND    | ND   | Y | Y | N           | mixed diet |
| 20.5 | 10.9  | 4.5 | 6.4  | 10  | 0.1  | 191 | 1.34  | 15.3 | 6.6  | ND    | ND   | N | N | N           | mixed diet |
| 20.4 | 11.2  | 5   | 6.2  | 10  | 0.08 | 178 | 4.95  | 23.1 | 7.74 | ND    | ND   | Y | Y | N           | mixed diet |
| 29.9 | 35.9  | 17  | 18.7 | 13  | 0.13 | 48  | ND    | ND   | ND   | ND    | ND   | Y | Y | N           | mixed diet |
| 36.2 | 6.5   | 2.8 | 3.7  | 13  | 0.15 | 131 | 1.15  | 52.2 | 13.5 | ND    | ND   | N | Y | N           | mixed diet |
| 26.3 | 46.4  | 27  | 19.7 | 18  | 1.66 | 50  | ND    | ND   | ND   | ND    | ND   | Y | Y | ascites     | mixed diet |
| 28.7 | 21.8  | 13  | 9    | 14  | 0.11 | 82  | 1.98  | 16.9 | 17.6 | ND    | ND   | Y | Y | N           | mixed diet |
| 23   | 13.7  | 7.8 | 5.9  | 12  | 0.83 | 83  | ND    | ND   | ND   | ND    | ND   | Y | Y | PVTT, pc    | mixed diet |
| 34   | 29.9  | 16  | 13.6 | 11  | 0.26 | 113 | ND    | ND   | ND   | ND    | ND   | Y | Y | PVTT, pc    | mixed diet |
| 29.7 | 7.3   | 3.2 | 4.1  | 11  | 0.23 | 193 | 1.368 | 0.97 | 4.38 | ND    | ND   | N | N | N           | mixed diet |
| 28   | 10.8  | 4.3 | 6.5  | 12  | 0.19 | 131 | 0.792 | 0.86 | 12.2 | ND    | ND   | Y | Y | N           | mixed diet |
| 27.5 | 18.1  | 9.6 | 8.5  | 11  | 0.55 | 129 | 1.95  | 17.8 | 62.5 | ND    | ND   | Y | Y | PVTT, pc    | mixed diet |
| 31.8 | 8.6   | 5.6 | 3    | 11  | 0.51 | 173 | ND    | ND   | ND   | ND    | ND   | Y | N | ascites     | mixed diet |
| 16.8 | 17.5  | 9.9 | 7.6  | 9.9 | 0.26 | 70  | ND    | ND   | ND   | ND    | ND   | N | N | N           | mixed diet |
| 21.2 | 10.1  | 3.4 | 6.7  | 11  | 0.09 | 225 | 3.94  | 67.7 | 8.9  | ND    | ND   | N | N | N           | mixed diet |
| 21.5 | 397.4 | 334 | 63   | 11  | 0.35 | 256 | 1.401 | >10C | 9.24 | ND    | ND   | Y | N | N           | mixed diet |
| 28.4 | 7.7   | 4   | 3.7  | 11  | 0.08 | 138 | ND    | ND   | ND   | ND    | ND   | N | Y | ascites, P' | mixed diet |
| 20.3 | 252.8 | 224 | 29   | 13  | 0.04 | 276 | 4.93  | 1092 | 6.7  | ND    | ND   | N | N | N           | mixed diet |
| 36   | 25    | 20  | 5.3  | 13  | 1.16 | 610 | 30.24 | 1.99 | 91.8 | 1757  | 29.9 | N | Y | N           | mixed diet |
| 26.9 | 422.2 | 343 | 79.5 | 19  | 3.63 | 118 | 1.76  | 230  | 236  | ND    | ND   | Y | N | ascites     | mixed diet |
| 21.8 | 10.7  | 480 | 5.9  | 9.6 | 0.11 | 107 | 0.801 | 19.8 | 14.3 | ND    | ND   | N | N | N           | mixed diet |
| 32.1 | 14.1  | 7.8 | 6.3  | 13  | 0.7  | 78  | 0.744 | 37.9 | 129  | ND    | ND   | Y | Y | ascites     | mixed diet |
| 19.8 | 10.6  | 3.9 | 6.7  | 12  | 0.03 | 203 | ND    | ND   | ND   | ND    | ND   | Y | Y | N           | mixed diet |
| 28.3 | 8.7   | 2.8 | 5.9  | 10  | 0.76 | 194 | 0.9   | 6.6  | 103  | ND    | ND   | N | Y | ascites     | mixed diet |
| 35.7 | 18.6  | 8.8 | 9.8  | 25  | 0.07 | 295 | 2.41  | 11.8 | 31.4 | ND    | ND   | Y | Y | portal hyf  | mixed diet |
| 31   | 42    | 21  | 21   | 14  | 3    | 125 | 5     | 5    | 23   | 145   | ND   | Y | Y | N           | mixed diet |
| 30.3 | 92.4  | 57  | 35   | 13  | 2.8  | 257 | 1.94  | 178  | ND   | ND    | ND   | Y | Y | portal hyf  | mixed diet |
| 30   | 6.6   | 2.8 | 3.8  | 12  | 0.05 | 179 | 2.12  | 11.6 | ND   | ND    | ND   | Y | Y | N           | mixed diet |
| 26.6 | 14.8  | 7.1 | 7.7  | 11  | 1.3  | 181 | 1.72  | 59.3 | ND   | ND    | ND   | Y | Y | PVTT, pc    | mixed diet |

|      |      |     |      |    |      |     |      |      |    |     |    |   |   |         |            |
|------|------|-----|------|----|------|-----|------|------|----|-----|----|---|---|---------|------------|
| 32.4 | 14   | 6.6 | 7.4  | 12 | 3.87 | 179 | ND   | ND   | ND | ND  | ND | Y | Y | ascites | mixed diet |
| 21.2 | 11.6 | 4.5 | 7.1  | 12 | 3.9  | 129 | 0.84 | 4.08 | ND | ND  | ND | Y | Y | N       | mixed diet |
| 32.4 | 18   | 5.9 | 12.1 | 13 | 0.9  | 69  | ND   | 14.8 | ND | 109 | ND | Y | Y | N       | mixed diet |
| 25.4 | 20.7 | 6.2 | 14.5 | 11 | 4.2  | 113 | 1.32 | 54.9 | ND | ND  | ND | Y | Y | N       | mixed diet |
| 32.4 | 20.7 | 6.2 | 14.5 | 11 | 4.5  | 113 | 1.32 | 54.9 | ND | ND  | ND | Y | Y | N       | mixed diet |

**Table S2. Taxon annotation of 1296 OTUs from all samples**

|        |                                                                                                       |      |
|--------|-------------------------------------------------------------------------------------------------------|------|
| OTU_1  | Bacteria;Bacteroidetes;Bacteroidia;Bacteroidales;Prevotellaceae;Prevotella                            | 1    |
| OTU_2  | Bacteria;Bacteroidetes;Bacteroidia;Bacteroidales;Bacteroidaceae;Bacteroides                           | 1    |
| OTU_3  | Bacteria;Bacteroidetes;Bacteroidia;Bacteroidales;Bacteroidaceae;Bacteroides                           | 1    |
| OTU_4  | Bacteria;Proteobacteria;Gammaproteobacteria;Enterobacteriales;Enterobacteriaceae;Escherichia/Shigella | 1    |
| OTU_5  | Bacteria;Firmicutes;Negativicutes;Selenomonadales;Acidaminococcaceae;Phascolarctobacterium            | 1    |
| OTU_6  | Bacteria;Firmicutes;Clostridia;Clostridiales;Ruminococcaceae;Faecalibacterium                         | 1    |
| OTU_7  | Bacteria;Firmicutes;Clostridia;Clostridiales;Lachnospiraceae;Roseburia                                | 0.96 |
| OTU_8  | Bacteria;Fusobacteria;Fusobacteria;Fusobacteriales;Fusobacteriaceae;Fusobacterium                     | 0.97 |
| OTU_9  | Bacteria;Proteobacteria;Alphaproteobacteria;Rhizobiales;Hyphomicrobiaceae;Gemmiger                    | 0.94 |
| OTU_10 | Bacteria;Bacteroidetes;Bacteroidia;Bacteroidales;Bacteroidaceae;Bacteroides                           | 1    |
| OTU_11 | Bacteria;Bacteroidetes;Bacteroidia;Bacteroidales;Bacteroidaceae;Bacteroides                           | 1    |
| OTU_12 | Bacteria;Firmicutes;Clostridia;Clostridiales;Ruminococcaceae;Clostridium IV                           | 0.73 |
| OTU_13 | Bacteria;Firmicutes;Clostridia;Clostridiales;Lachnospiraceae;Lachnospiraceae_incertae_sedis           | 0.8  |
| OTU_14 | Bacteria;Bacteroidetes;Bacteroidia;Bacteroidales;Rikenellaceae;Alistipes                              | 1    |
| OTU_15 | Bacteria;Firmicutes;Clostridia;Clostridiales;Lachnospiraceae;Roseburia                                | 1    |
| OTU_16 | Bacteria;Bacteroidetes;Bacteroidia;Bacteroidales;Bacteroidaceae;Bacteroides                           | 1    |
| OTU_17 | Bacteria;Bacteroidetes;Bacteroidia;Bacteroidales;Prevotellaceae;Prevotella                            | 1    |
| OTU_18 | Bacteria;Firmicutes                                                                                   | 0.79 |
| OTU_19 | Bacteria;Firmicutes;Bacilli;Lactobacillales;Streptococcaceae;Streptococcus                            | 1    |
| OTU_20 | Bacteria;Firmicutes;Clostridia;Clostridiales;Lachnospiraceae;Lachnospiraceae_incertae_sedis           | 0.94 |
| OTU_21 | Bacteria;Bacteroidetes;Bacteroidia;Bacteroidales;Bacteroidaceae;Bacteroides                           | 1    |
| OTU_22 | Bacteria;Firmicutes;Clostridia;Clostridiales;Ruminococcaceae                                          | 0.98 |
| OTU_23 | Bacteria;Firmicutes;Clostridia;Clostridiales;Lachnospiraceae;Lachnospiraceae_incertae_sedis           | 0.97 |
| OTU_24 | Bacteria;Firmicutes;Clostridia;Clostridiales;Lachnospiraceae;Lachnospiraceae_incertae_sedis           | 0.83 |
| OTU_25 | Bacteria;Bacteroidetes;Bacteroidia;Bacteroidales;Porphyromonadaceae;Parabacteroides                   | 1    |
| OTU_26 | Bacteria;Bacteroidetes;Bacteroidia;Bacteroidales;Rikenellaceae;Alistipes                              | 1    |
| OTU_27 | Bacteria;Firmicutes;Clostridia;Clostridiales;Ruminococcaceae;Ruminococcus                             | 0.89 |
| OTU_28 | Bacteria;Firmicutes;Negativicutes;Selenomonadales;Veillonellaceae;Dialister                           | 1    |
| OTU_29 | Bacteria;Firmicutes;Clostridia;Clostridiales;Ruminococcaceae;Oscillibacter                            | 0.72 |
| OTU_30 | Bacteria;Bacteroidetes;Bacteroidia;Bacteroidales;Bacteroidaceae;Bacteroides                           | 1    |
| OTU_31 | Bacteria;Firmicutes;Clostridia;Clostridiales;Peptostreptococcaceae;Clostridium XI                     | 1    |
| OTU_32 | Bacteria;Bacteroidetes;Bacteroidia;Bacteroidales;Bacteroidaceae;Bacteroides                           | 1    |
| OTU_33 | Bacteria;Firmicutes;Clostridia;Clostridiales;Lachnospiraceae;Clostridium XIVa                         | 0.53 |
| OTU_34 | Bacteria;Firmicutes;Negativicutes;Selenomonadales;Veillonellaceae;Megamonas                           | 1    |
| OTU_35 | Bacteria;Actinobacteria;Actinobacteria;Bifidobacteriales;Bifidobacteriaceae;Bifidobacterium           | 1    |
| OTU_36 | Bacteria;Firmicutes;Negativicutes;Selenomonadales;Veillonellaceae;Dialister                           | 1    |
| OTU_37 | Bacteria;Proteobacteria;Betaproteobacteria;Burkholderiales;Sutterellaceae;Parasutterella              | 1    |
| OTU_38 | Bacteria;Firmicutes;Erysipelotrichia;Erysipelotrichales;Erysipelotrichaceae;Clostridium XVIII         | 0.84 |
| OTU_39 | Bacteria;Actinobacteria;Actinobacteria;Bifidobacteriales;Bifidobacteriaceae;Bifidobacterium           | 1    |
| OTU_40 | Bacteria;Proteobacteria;Gammaproteobacteria;Pasteurellales;Pasteurellaceae;Haemophilus                | 0.97 |
| OTU_41 | Bacteria;Firmicutes;Clostridia;Clostridiales;Clostridiaceae 1;Clostridium sensu stricto               | 1    |
| OTU_42 | Bacteria;Firmicutes;Clostridia;Clostridiales;Lachnospiraceae;Clostridium XIVa                         | 0.85 |
| OTU_43 | Bacteria;Firmicutes;Clostridia;Clostridiales;Lachnospiraceae;Blautia                                  | 1    |
| OTU_44 | Bacteria;Firmicutes;Clostridia;Clostridiales;Ruminococcaceae                                          | 0.7  |
| OTU_45 | Bacteria;Proteobacteria;Betaproteobacteria;Burkholderiales;Sutterellaceae;Sutterella                  | 1    |
| OTU_46 | Bacteria;Firmicutes;Negativicutes;Selenomonadales;Veillonellaceae;Megasphaera                         | 1    |
| OTU_47 | Bacteria;Firmicutes;Clostridia;Clostridiales;Lachnospiraceae                                          | 1    |
| OTU_48 | Bacteria;Firmicutes                                                                                   | 0.82 |
| OTU_49 | Bacteria;Verrucomicrobia;Verrucomicrobiae;Verrucomicrobiales;Verrucomicrobiaceae;Akkermansia          | 1    |
| OTU_50 | Bacteria;Firmicutes;Negativicutes;Selenomonadales;Veillonellaceae;Veillonella                         | 1    |

|         |                                                                                                        |      |
|---------|--------------------------------------------------------------------------------------------------------|------|
| OTU_51  | Bacteria;Firmicutes;Clostridia;Clostridiales;Ruminococcaceae;Oscillibacter                             | 1    |
| OTU_52  | Bacteria;Firmicutes;Clostridia;Clostridiales;Lachnospiraceae;Coprococcus                               | 0.99 |
| OTU_53  | Bacteria;Bacteroidetes;Bacteroidia;Bacteroidales;Porphyromonadaceae                                    | 0.82 |
| OTU_54  | Bacteria;Firmicutes;Clostridia;Clostridiales;Ruminococcaceae;Ruminococcus                              | 0.76 |
| OTU_55  | Bacteria;Proteobacteria;Deltaproteobacteria;Desulfovibrionales;Desulfovibrionaceae;Bilophila           | 1    |
| OTU_56  | Bacteria;Firmicutes;Clostridia;Clostridiales;Ruminococcaceae                                           | 1    |
| OTU_57  | Bacteria;Firmicutes;Clostridia;Clostridiales;Ruminococcaceae                                           | 0.67 |
| OTU_58  | Bacteria;Firmicutes;Clostridia;Clostridiales;Ruminococcaceae                                           | 0.95 |
| OTU_59  | Bacteria;Firmicutes;Clostridia;Clostridiales;Ruminococcaceae;Clostridium IV                            | 1    |
| OTU_60  | Bacteria;Proteobacteria;Betaproteobacteria;Burkholderiales;Sutterellaceae                              | 0.64 |
| OTU_61  | Bacteria;Firmicutes;Clostridia;Clostridiales;Ruminococcaceae;Flavonifractor                            | 1    |
| OTU_62  | Bacteria;Fusobacteria;Fusobacteria;Fusobacteriales;Fusobacteriaceae;Cetobacterium                      | 1    |
| OTU_63  | Bacteria;Proteobacteria;Gammaproteobacteria;Enterobacteriales;Enterobacteriaceae                       | 1    |
| OTU_64  | Bacteria;Firmicutes;Clostridia;Clostridiales;Lachnospiraceae;Clostridium XIVa                          | 1    |
| OTU_65  | Bacteria;Firmicutes;Erysipelotrichia;Erysipelotrichales;Erysipelotrichaceae;Erysipelotrichaceae_incert | 1    |
| OTU_66  | Bacteria;Bacteroidetes;Bacteroidia;Bacteroidales;Porphyromonadaceae                                    | 0.87 |
| OTU_67  | Bacteria;Firmicutes;Negativicutes;Selenomonadales;Acidaminococcaceae;Phascolarctobacterium             | 0.9  |
| OTU_68  | Bacteria;Firmicutes;Clostridia;Clostridiales;Lachnospiraceae;Dorea                                     | 1    |
| OTU_69  | Bacteria;Bacteroidetes;Bacteroidia;Bacteroidales;Prevotellaceae;Prevotella                             | 1    |
| OTU_70  | Bacteria;Firmicutes;Clostridia;Clostridiales;Lachnospiraceae;Coprococcus                               | 1    |
| OTU_71  | Bacteria;Bacteroidetes;Bacteroidia;Bacteroidales;Prevotellaceae;Paraprevotella                         | 1    |
| OTU_72  | Bacteria;Proteobacteria;Gammaproteobacteria;Aeromonadales;Succinivibrionaceae;Succinivibrio            | 1    |
| OTU_73  | Bacteria;Bacteroidetes;Bacteroidia;Bacteroidales;Bacteroidaceae;Bacteroides                            | 1    |
| OTU_74  | Bacteria;Firmicutes;Clostridia;Clostridiales;Ruminococcaceae;Sporobacter                               | 0.51 |
| OTU_75  | Bacteria;Bacteroidetes;Bacteroidia;Bacteroidales;Porphyromonadaceae;Parabacteroides                    | 1    |
| OTU_76  | Bacteria;Bacteroidetes;Bacteroidia;Bacteroidales;Bacteroidaceae;Bacteroides                            | 1    |
| OTU_77  | Bacteria;Bacteroidetes;Bacteroidia;Bacteroidales;Porphyromonadaceae;Odoribacter                        | 1    |
| OTU_78  | Bacteria;Proteobacteria;Betaproteobacteria;Burkholderiales;Sutterellaceae;Sutterella                   | 1    |
| OTU_79  | Bacteria;Firmicutes;Clostridia;Clostridiales;Ruminococcaceae                                           | 0.61 |
| OTU_80  | Bacteria;Bacteroidetes;Bacteroidia;Bacteroidales;Rikenellaceae;Alistipes                               | 1    |
| OTU_81  | Bacteria;Spirochaetes;Spirochaetes;Spirochaetales;Spirochaetaceae;Treponema                            | 1    |
| OTU_82  | Bacteria;Proteobacteria;Deltaproteobacteria;Desulfovibrionales;Desulfovibrionaceae;Desulfovibrio       | 1    |
| OTU_83  | Bacteria;Firmicutes;Clostridia;Clostridiales                                                           | 0.75 |
| OTU_84  | Bacteria;Firmicutes;Clostridia;Clostridiales;Ruminococcaceae;Acetanaerobacterium                       | 0.61 |
| OTU_85  | Bacteria;Firmicutes;Clostridia;Clostridiales;Lachnospiraceae;Clostridium XIVa                          | 0.53 |
| OTU_86  | Bacteria;Firmicutes;Clostridia;Clostridiales;Lachnospiraceae;Lachnospiraceae_incertae_sedis            | 0.55 |
| OTU_87  | Bacteria;Actinobacteria;Actinobacteria;Coriobacteriales;Coriobacteriaceae;Collinsella                  | 1    |
| OTU_88  | Bacteria;Firmicutes;Clostridia;Clostridiales;Lachnospiraceae;Lachnospiraceae_incertae_sedis            | 0.86 |
| OTU_89  | Bacteria;Firmicutes;Clostridia;Clostridiales                                                           | 0.89 |
| OTU_90  | Bacteria;Proteobacteria;Alphaproteobacteria;Rhodospirillales;Rhodospirillaceae                         | 0.55 |
| OTU_91  | Bacteria;Firmicutes;Clostridia;Clostridiales;Ruminococcaceae;Oscillibacter                             | 1    |
| OTU_92  | Bacteria;Bacteroidetes;Bacteroidia;Bacteroidales;Rikenellaceae;Alistipes                               | 0.84 |
| OTU_93  | Bacteria;Firmicutes;Clostridia;Clostridiales;Ruminococcaceae                                           | 0.59 |
| OTU_94  | Bacteria;Bacteroidetes;Bacteroidia;Bacteroidales;Prevotellaceae;Prevotella                             | 0.7  |
| OTU_95  | Bacteria;Firmicutes;Clostridia;Clostridiales                                                           | 0.99 |
| OTU_96  | Bacteria;Bacteroidetes;Bacteroidia;Bacteroidales;Prevotellaceae;Prevotella                             | 0.99 |
| OTU_97  | Bacteria;Firmicutes;Clostridia;Clostridiales;Lachnospiraceae;Blautia                                   | 0.99 |
| OTU_98  | Bacteria;Firmicutes;Erysipelotrichia;Erysipelotrichales;Erysipelotrichaceae;Catenibacterium            | 1    |
| OTU_99  | Bacteria;Firmicutes;Clostridia;Clostridiales                                                           | 0.56 |
| OTU_100 | Bacteria;Firmicutes;Clostridia;Clostridiales;Lachnospiraceae;Anaerostipes                              | 0.93 |
| OTU_101 | Bacteria;Firmicutes;Clostridia;Clostridiales;Clostridiaceae 1;Clostridium sensu stricto                | 1    |



|         |                                                                                                |      |
|---------|------------------------------------------------------------------------------------------------|------|
| OTU_102 | Bacteria;Firmicutes;Clostridia;Clostridiales;Ruminococcaceae                                   | 0.98 |
| OTU_103 | Bacteria;Firmicutes;Clostridia;Clostridiales;Ruminococcaceae;Ruminococcus                      | 1    |
| OTU_104 | Bacteria;Firmicutes;Clostridia;Clostridiales;Ruminococcaceae                                   | 1    |
| OTU_105 | Bacteria;Proteobacteria;Betaproteobacteria;Burkholderiales;Sutterellaceae;Sutterella           | 1    |
| OTU_106 | Bacteria;Bacteroidetes;Bacteroidia;Bacteroidales;Prevotellaceae;Prevotella                     | 1    |
| OTU_107 | Bacteria;Firmicutes;Bacilli;Lactobacillales;Streptococcaceae;Streptococcus                     | 1    |
| OTU_108 | Bacteria;Firmicutes;Bacilli;Lactobacillales;Lactobacillaceae;Lactobacillus                     | 1    |
| OTU_109 | Bacteria;Bacteroidetes;Bacteroidia;Bacteroidales;Porphyromonadaceae;Barnesiella                | 1    |
| OTU_110 | Bacteria;Spirochaetes;Spirochaetes;Spirochaetales;Spirochaetaceae;Treponema                    | 1    |
| OTU_111 | Bacteria;Proteobacteria;Deltaproteobacteria;Bdellovibrionales;Bdellovibrionaceae;Vampirovibrio | 0.52 |
| OTU_112 | Bacteria;Firmicutes;Erysipelotrichia;Erysipelotrichales;Erysipelotrichaceae                    | 0.55 |
| OTU_113 | Bacteria;Firmicutes;Clostridia;Clostridiales;Ruminococcaceae;Ruminococcus                      | 0.78 |
| OTU_114 | Bacteria;Proteobacteria;Alphaproteobacteria;Rhodospirillales;Rhodospirillaceae                 | 0.65 |
| OTU_115 | Bacteria;Firmicutes;Negativicutes;Selenomonadales;Veillonellaceae;Dialister                    | 0.99 |
| OTU_116 | Bacteria;Firmicutes;Clostridia;Clostridiales                                                   | 0.64 |
| OTU_117 | Bacteria;Firmicutes;Clostridia;Clostridiales;Lachnospiraceae;Clostridium XIVb                  | 0.95 |
| OTU_118 | Bacteria;Firmicutes;Negativicutes;Selenomonadales;Acidaminococcaceae                           | 0.9  |
| OTU_119 | Bacteria;Firmicutes;Clostridia;Clostridiales;Peptostreptococcaceae;Clostridium XI              | 1    |
| OTU_120 | Bacteria;Firmicutes;Erysipelotrichia;Erysipelotrichales;Erysipelotrichaceae;Clostridium XVIII  | 1    |
| OTU_121 | Bacteria;Firmicutes;Clostridia;Clostridiales;Lachnospiraceae;Clostridium XIVb                  | 1    |
| OTU_122 | Bacteria;Proteobacteria;Betaproteobacteria;Burkholderiales;Sutterellaceae;Sutterella           | 0.93 |
| OTU_123 | Bacteria;Firmicutes;Clostridia;Clostridiales;Lachnospiraceae;Clostridium XIVa                  | 0.77 |
| OTU_124 | Bacteria;Bacteroidetes;Bacteroidia;Bacteroidales;Rikenellaceae;Alistipes                       | 1    |
| OTU_125 | Bacteria;Firmicutes;Clostridia;Clostridiales;Lachnospiraceae                                   | 0.61 |
| OTU_126 | Bacteria;Firmicutes;Clostridia;Clostridiales;Ruminococcaceae;Clostridium IV                    | 0.9  |
| OTU_127 | Bacteria;Firmicutes;Clostridia;Clostridiales;Lachnospiraceae;Lachnospiracea_incertae_sedis     | 0.98 |
| OTU_128 | Bacteria;Firmicutes;Clostridia;Clostridiales;Ruminococcaceae;Butyricoccus                      | 0.96 |
| OTU_129 | Bacteria;Firmicutes;Clostridia;Clostridiales;Lachnospiraceae;Lachnospiracea_incertae_sedis     | 1    |
| OTU_130 | Bacteria;Firmicutes;Clostridia;Clostridiales;Ruminococcaceae;Clostridium IV                    | 0.91 |
| OTU_131 | Bacteria;Firmicutes;Clostridia                                                                 | 0.51 |
| OTU_132 | Bacteria;Firmicutes;Clostridia;Clostridiales;Lachnospiraceae;Clostridium XIVb                  | 1    |
| OTU_133 | Bacteria;Actinobacteria;Actinobacteria;Coriobacteriales;Coriobacteriaceae;Slackia              | 1    |
| OTU_134 | Bacteria;Firmicutes;Clostridia;Clostridiales;Lachnospiraceae;Lachnospiracea_incertae_sedis     | 0.62 |
| OTU_135 | Bacteria;Firmicutes;Clostridia;Clostridiales                                                   | 0.82 |
| OTU_136 | Bacteria;Firmicutes;Bacilli;Lactobacillales;Lactobacillaceae;Lactobacillus                     | 1    |
| OTU_137 | Bacteria;Firmicutes;Clostridia;Clostridiales;Ruminococcaceae;Butyricoccus                      | 0.9  |
| OTU_138 | Bacteria;Firmicutes;Clostridia;Clostridiales                                                   | 0.52 |
| OTU_139 | Bacteria;Bacteroidetes;Bacteroidia;Bacteroidales;Porphyromonadaceae;Butyricimonas              | 1    |
| OTU_140 | Bacteria;Bacteroidetes;Bacteroidia;Bacteroidales;Porphyromonadaceae;Dysgonomonas               | 1    |
| OTU_141 | Bacteria;Firmicutes;Clostridia;Clostridiales                                                   | 0.72 |
| OTU_142 | Bacteria;Firmicutes;Clostridia;Clostridiales;Lachnospiraceae                                   | 1    |
| OTU_143 | Bacteria;Bacteroidetes;Bacteroidia;Bacteroidales;Prevotellaceae;Prevotella                     | 0.64 |
| OTU_144 | Bacteria;Bacteroidetes;Bacteroidia;Bacteroidales;Prevotellaceae;Prevotella                     | 0.8  |
| OTU_145 | Bacteria;Proteobacteria;Betaproteobacteria;Burkholderiales;Sutterellaceae;Sutterella           | 1    |
| OTU_146 | Bacteria;Tenericutes;Mollicutes;Anaeroplasmatales;Anaeroplasmataceae;Asteroleplasma            | 0.92 |
| OTU_147 | Bacteria;Proteobacteria;Gammaproteobacteria;Enterobacteriales;Enterobacteriaceae;Citrobacter   | 0.71 |
| OTU_148 | Bacteria;Firmicutes                                                                            | 0.75 |
| OTU_149 | Bacteria;Firmicutes;Clostridia;Clostridiales;Ruminococcaceae;Clostridium IV                    | 0.87 |
| OTU_150 | Bacteria;Proteobacteria;Alphaproteobacteria;Rhizobiales;Hyphomicrobiaceae;Gemmiger             | 0.8  |
| OTU_151 | Bacteria;Firmicutes;Clostridia;Clostridiales;Ruminococcaceae;Flavonifractor                    | 0.79 |
| OTU_152 | Bacteria;Firmicutes;Clostridia;Clostridiales;Ruminococcaceae                                   | 0.56 |

|         |                                                                                                        |      |
|---------|--------------------------------------------------------------------------------------------------------|------|
| OTU_153 | Bacteria;Bacteroidetes;Bacteroidia;Bacteroidales;Rikenellaceae;Alistipes                               | 1    |
| OTU_154 | Bacteria;Firmicutes;Clostridia;Clostridiales;Ruminococcaceae;Ruminococcus                              | 0.88 |
| OTU_155 | Bacteria;Bacteroidetes;Bacteroidia;Bacteroidales;Bacteroidaceae;Bacteroides                            | 1    |
| OTU_156 | Bacteria;Firmicutes;Bacilli;Lactobacillales;Lactobacillaceae;Lactobacillus                             | 1    |
| OTU_157 | Bacteria;Firmicutes;Erysipelotrichia;Erysipelotrichales;Erysipelotrichaceae                            | 0.85 |
| OTU_158 | Bacteria;Bacteroidetes;Bacteroidia;Bacteroidales;Prevotellaceae;Paraprevotella                         | 1    |
| OTU_159 | Bacteria;Firmicutes;Clostridia;Clostridiales;Ruminococcaceae;Ruminococcus                              | 0.72 |
| OTU_160 | Bacteria;Bacteroidetes;Bacteroidia;Bacteroidales;Porphyromonadaceae;Barnesiella                        | 0.9  |
| OTU_161 | Bacteria;Proteobacteria;Deltaproteobacteria;Desulfovibrionales;Desulfovibrionaceae                     | 0.9  |
| OTU_162 | Bacteria;Bacteroidetes;Bacteroidia;Bacteroidales;Rikenellaceae;Alistipes                               | 1    |
| OTU_163 | Bacteria;Actinobacteria;Actinobacteria;Coriobacteriales;Coriobacteriaceae                              | 1    |
| OTU_164 | Bacteria;Actinobacteria;Actinobacteria;Coriobacteriales;Coriobacteriaceae;Enterorhabdus                | 0.87 |
| OTU_165 | Bacteria;Firmicutes;Negativicutes;Selenomonadales;Acidaminococcaceae;Phascolarctobacterium             | 0.82 |
| OTU_166 | Bacteria;Actinobacteria;Actinobacteria;Coriobacteriales;Coriobacteriaceae;Olsenella                    | 0.7  |
| OTU_167 | Bacteria;Firmicutes;Clostridia;Clostridiales                                                           | 0.77 |
| OTU_168 | Bacteria;Firmicutes;Erysipelotrichia;Erysipelotrichales;Erysipelotrichaceae                            | 0.59 |
| OTU_169 | Bacteria;Bacteroidetes;Bacteroidia;Bacteroidales;Prevotellaceae;Hallella                               | 1    |
| OTU_170 | Bacteria;TM7;TM7_genera_incertae_sedis;TM7_genera_incertae_sedis;TM7_genera_incertae_sedis;I           | 1    |
| OTU_171 | Bacteria;Firmicutes;Clostridia;Clostridiales;Lachnospiraceae;Lachnospiracea_incertae_sedis             | 0.91 |
| OTU_172 | Bacteria;Bacteroidetes;Bacteroidia;Bacteroidales;Porphyromonadaceae;Parabacteroides                    | 1    |
| OTU_173 | Bacteria;Proteobacteria;Deltaproteobacteria;Bdellovibrionales;Bdellovibrionaceae;Vampirovibrio         | 0.64 |
| OTU_174 | Bacteria;Firmicutes;Clostridia;Clostridiales;Lachnospiraceae;Clostridium XIVa                          | 0.57 |
| OTU_175 | Bacteria;Proteobacteria;Betaproteobacteria;Burkholderiales;Sutterellaceae;Sutterella                   | 0.58 |
| OTU_176 | Bacteria;Bacteroidetes;Bacteroidia;Bacteroidales;Porphyromonadaceae;Butyricimonas                      | 1    |
| OTU_177 | Bacteria;Firmicutes;Clostridia;Clostridiales;Ruminococcaceae;Ruminococcus                              | 1    |
| OTU_178 | Bacteria;Bacteroidetes;Bacteroidia;Bacteroidales;Prevotellaceae;Prevotella                             | 0.65 |
| OTU_179 | Bacteria;Bacteroidetes;Bacteroidia;Bacteroidales;Bacteroidaceae;Bacteroides                            | 1    |
| OTU_180 | Bacteria;Bacteroidetes;Bacteroidia;Bacteroidales;Prevotellaceae;Prevotella                             | 0.79 |
| OTU_181 | Bacteria;Bacteroidetes;Bacteroidia;Bacteroidales;Prevotellaceae;Prevotella                             | 1    |
| OTU_182 | Bacteria;Firmicutes;Clostridia;Clostridiales                                                           | 0.84 |
| OTU_183 | Bacteria;Firmicutes;Clostridia;Clostridiales                                                           | 0.93 |
| OTU_184 | Bacteria;Firmicutes;Erysipelotrichia;Erysipelotrichales;Erysipelotrichaceae;Erysipelotrichaceae_incert | 1    |
| OTU_185 | Bacteria;Firmicutes;Clostridia;Clostridiales                                                           | 0.77 |
| OTU_186 | Bacteria;Firmicutes;Clostridia;Clostridiales;Ruminococcaceae                                           | 1    |
| OTU_187 | Bacteria;Firmicutes;Clostridia;Clostridiales;Ruminococcaceae                                           | 0.93 |
| OTU_188 | Bacteria;Proteobacteria;Epsilonproteobacteria;Campylobacteriales;Campylobacteraceae;Campylobacter      | 1    |
| OTU_189 | Bacteria;Proteobacteria;Deltaproteobacteria;Bdellovibrionales;Bdellovibrionaceae;Vampirovibrio         | 0.53 |
| OTU_190 | Bacteria;Firmicutes;Bacilli;Lactobacillales;Lactobacillaceae;Lactobacillus                             | 1    |
| OTU_191 | Bacteria;Firmicutes                                                                                    | 0.73 |
| OTU_192 | Bacteria;Bacteroidetes;Bacteroidia;Bacteroidales;Prevotellaceae;Prevotella                             | 0.9  |
| OTU_193 | Bacteria;Firmicutes;Clostridia;Clostridiales;Ruminococcaceae;Clostridium IV                            | 0.6  |
| OTU_194 | Bacteria;Firmicutes;Bacilli;Lactobacillales;Leuconostocaceae;Weissella                                 | 1    |
| OTU_195 | Bacteria;Firmicutes;Clostridia;Clostridiales                                                           | 0.78 |
| OTU_196 | Bacteria;Bacteroidetes;Bacteroidia;Bacteroidales;Prevotellaceae;Prevotella                             | 1    |
| OTU_197 | Bacteria;Bacteroidetes;Bacteroidia;Bacteroidales;Rikenellaceae;Alistipes                               | 0.99 |
| OTU_198 | Bacteria;Firmicutes;Clostridia;Clostridiales;Ruminococcaceae;Oscillibacter                             | 0.97 |
| OTU_199 | Bacteria;Firmicutes;Clostridia;Clostridiales;Lachnospiraceae;Clostridium XIVa                          | 0.58 |
| OTU_200 | Bacteria;Firmicutes;Clostridia;Clostridiales;Lachnospiraceae;Lachnospiracea_incertae_sedis             | 0.58 |
| OTU_201 | Bacteria;Firmicutes;Clostridia;Clostridiales;Ruminococcaceae;Flavonifractor                            | 0.85 |
| OTU_202 | Bacteria;Bacteroidetes;Bacteroidia;Bacteroidales;Porphyromonadaceae                                    | 0.67 |
| OTU_203 | Bacteria;Firmicutes;Erysipelotrichia;Erysipelotrichales;Erysipelotrichaceae;Turicibacter               | 1    |

|         |                                                                                                        |      |
|---------|--------------------------------------------------------------------------------------------------------|------|
| OTU_204 | Bacteria;Bacteroidetes                                                                                 | 0.99 |
| OTU_205 | Bacteria                                                                                               | 0.94 |
| OTU_206 | Bacteria                                                                                               | 1    |
| OTU_207 | Bacteria;Firmicutes;Clostridia;Clostridiales;Lachnospiraceae;Coprococcus                               | 0.99 |
| OTU_208 | Bacteria;Fusobacteria;Fusobacteria;Fusobacteriales;Fusobacteriaceae                                    | 1    |
| OTU_209 | Bacteria;Actinobacteria;Actinobacteria;Bifidobacteriales;Bifidobacteriaceae;Bifidobacterium            | 1    |
| OTU_210 | Bacteria;Firmicutes;Clostridia;Clostridiales;Ruminococcaceae                                           | 1    |
| OTU_211 | Bacteria;Firmicutes;Clostridia                                                                         | 0.52 |
| OTU_212 | Bacteria;Firmicutes;Clostridia;Clostridiales;Ruminococcaceae;Clostridium IV                            | 0.74 |
| OTU_213 | Bacteria;Proteobacteria;Alphaproteobacteria;Rhodospirillales;Rhodospirillaceae                         | 0.68 |
| OTU_214 | Bacteria;Firmicutes;Clostridia;Clostridiales;Lachnospiraceae                                           | 1    |
| OTU_215 | Bacteria;Firmicutes;Erysipelotrichia;Erysipelotrichales;Erysipelotrichaceae;Erysipelotrichaceae_incert | 1    |
| OTU_216 | Bacteria;Actinobacteria;Actinobacteria;Coriobacteriales;Coriobacteriaceae                              | 0.85 |
| OTU_217 | Bacteria;Bacteroidetes;Bacteroidia;Bacteroidales;Bacteroidaceae;Bacteroides                            | 1    |
| OTU_218 | Bacteria;Firmicutes;Erysipelotrichia;Erysipelotrichales;Erysipelotrichaceae;Holdemania                 | 1    |
| OTU_219 | Bacteria;Firmicutes;Negativicutes;Selenomonadales;Veillonellaceae;Megasphaera                          | 1    |
| OTU_220 | Bacteria;Firmicutes;Clostridia;Clostridiales;Lachnospiraceae                                           | 0.98 |
| OTU_221 | Bacteria;Firmicutes;Clostridia;Clostridiales;Lachnospiraceae;Howardella                                | 1    |
| OTU_222 | Bacteria;Firmicutes;Bacilli;Lactobacillales;Enterococcaceae;Enterococcus                               | 1    |
| OTU_223 | Bacteria;Firmicutes;Clostridia;Clostridiales;Ruminococcaceae                                           | 0.99 |
| OTU_224 | Bacteria;Firmicutes;Erysipelotrichia;Erysipelotrichales;Erysipelotrichaceae;Allobaculum                | 0.52 |
| OTU_225 | Bacteria;Firmicutes;Clostridia;Clostridiales;Ruminococcaceae                                           | 0.91 |
| OTU_226 | Bacteria;Firmicutes;Erysipelotrichia;Erysipelotrichales;Erysipelotrichaceae;Erysipelotrichaceae_incert | 1    |
| OTU_227 | Bacteria;Spirochaetes;Spirochaetes;Spirochaetales;Spirochaetaceae;Treponema                            | 0.99 |
| OTU_228 | Bacteria;Firmicutes;Clostridia;Clostridiales;Clostridiaceae 1;Clostridium sensu stricto                | 1    |
| OTU_229 | Bacteria;Firmicutes;Clostridia;Clostridiales;Ruminococcaceae                                           | 0.78 |
| OTU_230 | Archaea;Euryarchaeota;Methanobacteria;Methanobacteriales;Methanobacteriaceae;Methanobrevibacte         | 1    |
| OTU_231 | Bacteria;Firmicutes;Clostridia;Clostridiales;Ruminococcaceae                                           | 0.77 |
| OTU_232 | Bacteria;Bacteroidetes;Bacteroidia;Bacteroidales;Bacteroidaceae;Bacteroides                            | 0.95 |
| OTU_233 | Bacteria;Firmicutes;Clostridia;Clostridiales;Ruminococcaceae;Clostridium IV                            | 0.87 |
| OTU_234 | Bacteria;Bacteroidetes;Bacteroidia;Bacteroidales;Rikenellaceae;Alistipes                               | 1    |
| OTU_235 | Bacteria;Firmicutes;Clostridia;Clostridiales;Ruminococcaceae;Clostridium IV                            | 1    |
| OTU_236 | Bacteria;Actinobacteria;Actinobacteria;Coriobacteriales;Coriobacteriaceae;Collinsella                  | 1    |
| OTU_237 | Bacteria;Firmicutes;Erysipelotrichia;Erysipelotrichales;Erysipelotrichaceae;Coprobacillus              | 1    |
| OTU_238 | Bacteria;Tenericutes;Mollicutes;Anaeroplasmatales;Anaeroplasmataceae;Anaeroplasmata                    | 0.83 |
| OTU_239 | Bacteria;Firmicutes;Clostridia;Clostridiales                                                           | 0.84 |
| OTU_240 | Bacteria;Proteobacteria;Deltaproteobacteria;Bdellovibrionales;Bdellovibrionaceae;Vampirovibrio         | 0.71 |
| OTU_241 | Bacteria;Firmicutes;Negativicutes;Selenomonadales;Veillonellaceae;Veillonella                          | 1    |
| OTU_242 | Bacteria;Bacteroidetes;Bacteroidia;Bacteroidales;Bacteroidaceae;Bacteroides                            | 1    |
| OTU_243 | Bacteria;Bacteroidetes;Bacteroidia;Bacteroidales;Bacteroidaceae;Bacteroides                            | 1    |
| OTU_244 | Bacteria;Actinobacteria;Actinobacteria;Coriobacteriales;Coriobacteriaceae;Eggerthella                  | 1    |
| OTU_245 | Bacteria;Firmicutes;Clostridia;Clostridiales                                                           | 0.71 |
| OTU_246 | Bacteria;Firmicutes;Clostridia;Clostridiales                                                           | 0.85 |
| OTU_247 | Bacteria;Firmicutes;Bacilli;Lactobacillales;Aerococcaceae;Abiotrophia                                  | 0.98 |
| OTU_248 | Bacteria;Bacteroidetes;Bacteroidia;Bacteroidales;Bacteroidaceae;Bacteroides                            | 1    |
| OTU_249 | Bacteria;Bacteroidetes;Bacteroidia;Bacteroidales                                                       | 1    |
| OTU_250 | Bacteria;Firmicutes;Clostridia;Clostridiales;Ruminococcaceae                                           | 0.55 |
| OTU_251 | Bacteria;Firmicutes;Negativicutes;Selenomonadales;Veillonellaceae;Dialister                            | 1    |
| OTU_252 | Bacteria;Firmicutes;Bacilli;Bacillales;Bacillales_Incertae Sedis XI;Gemella                            | 1    |
| OTU_253 | Bacteria;Firmicutes;Clostridia;Clostridiales;Lachnospiraceae                                           | 0.98 |
| OTU_254 | Bacteria;Firmicutes;Bacilli;Lactobacillales;Carnobacteriaceae;Granulicatella                           | 0.99 |

|         |                                                                                                    |      |
|---------|----------------------------------------------------------------------------------------------------|------|
| OTU_255 | Bacteria;Firmicutes;Clostridia;Clostridiales;Ruminococcaceae;Faecalibacterium                      | 0.8  |
| OTU_256 | Bacteria;Bacteroidetes;Bacteroidia;Bacteroidales;Bacteroidaceae;Bacteroides                        | 1    |
| OTU_257 | Bacteria;Firmicutes;Clostridia;Clostridiales;Ruminococcaceae;Anaerotruncus                         | 0.55 |
| OTU_258 | Bacteria;Firmicutes;Negativicutes;Selenomonadales;Veillonellaceae;Mitsuokella                      | 1    |
| OTU_259 | Bacteria;Bacteroidetes;Bacteroidia;Bacteroidales;Marinilabiaceae;Anaerophaga                       | 0.6  |
| OTU_260 | Bacteria;Bacteroidetes;Bacteroidia;Bacteroidales;Prevotellaceae;Paraprevotella                     | 1    |
| OTU_261 | Bacteria;Lentisphaerae;Lentisphaeria;Victivallales;Victivallaceae;Victivallis                      | 1    |
| OTU_262 | Bacteria;Firmicutes;Clostridia;Clostridiales;Lachnospiraceae;Clostridium XIVa                      | 0.78 |
| OTU_263 | Bacteria;Firmicutes;Clostridia;Clostridiales                                                       | 0.62 |
| OTU_264 | Bacteria;Proteobacteria;Gammaproteobacteria;Enterobacteriales;Enterobacteriaceae;Proteus           | 0.99 |
| OTU_265 | Bacteria;Firmicutes                                                                                | 0.66 |
| OTU_266 | Bacteria;Proteobacteria;Gammaproteobacteria;Enterobacteriales;Enterobacteriaceae;Hafnia            | 0.55 |
| OTU_267 | Bacteria;Firmicutes;Negativicutes;Selenomonadales;Veillonellaceae;Dialister                        | 1    |
| OTU_268 | Bacteria;Proteobacteria;Betaproteobacteria;Burkholderiales;Sutterellaceae;Parasutterella           | 1    |
| OTU_269 | Bacteria;Firmicutes;Clostridia;Clostridiales;Ruminococcaceae                                       | 0.95 |
| OTU_270 | Bacteria;Bacteroidetes;Bacteroidia;Bacteroidales;Bacteroidaceae;Bacteroides                        | 1    |
| OTU_271 | Bacteria;Firmicutes;Clostridia;Clostridiales;Ruminococcaceae;Acetivibrio                           | 0.58 |
| OTU_272 | Bacteria;Firmicutes;Clostridia;Clostridiales;Ruminococcaceae;Ruminococcus                          | 0.97 |
| OTU_273 | Bacteria;Firmicutes;Erysipelotrichia;Erysipelotrichales;Erysipelotrichaceae;Solobacterium          | 1    |
| OTU_274 | Bacteria;Firmicutes;Clostridia;Clostridiales                                                       | 0.55 |
| OTU_275 | Bacteria;Firmicutes;Clostridia;Clostridiales                                                       | 0.71 |
| OTU_276 | Bacteria;Proteobacteria;Epsilonproteobacteria;Campylobacteriales;Campylobacteriaceae;Campylobacter | 1    |
| OTU_277 | Bacteria;Firmicutes;Clostridia;Clostridiales                                                       | 0.62 |
| OTU_278 | Bacteria;Firmicutes;Negativicutes;Selenomonadales;Veillonellaceae;Veillonella                      | 1    |
| OTU_279 | Bacteria;Firmicutes;Clostridia;Clostridiales;Ruminococcaceae                                       | 0.81 |
| OTU_280 | Bacteria;Actinobacteria;Actinobacteria;Coriobacteriales;Coriobacteriaceae                          | 1    |
| OTU_281 | Bacteria;Proteobacteria;Gammaproteobacteria;Enterobacteriales;Enterobacteriaceae;Providencia       | 1    |
| OTU_282 | Bacteria;Firmicutes;Clostridia;Clostridiales;Lachnospiraceae                                       | 0.99 |
| OTU_283 | Bacteria;Firmicutes;Clostridia;Clostridiales;Ruminococcaceae;Pseudoflavonifractor                  | 0.51 |
| OTU_284 | Bacteria;Firmicutes;Erysipelotrichia;Erysipelotrichales;Erysipelotrichaceae;Coprobacillus          | 0.94 |
| OTU_285 | Bacteria;TM7;TM7_genera_incertae_sedis;TM7_genera_incertae_sedis;TM7_genera_incertae_sedis;T       | 1    |
| OTU_286 | Bacteria;Bacteroidetes;Bacteroidia;Bacteroidales;Porphyromonadaceae;Butyricimonas                  | 1    |
| OTU_287 | Bacteria;Firmicutes;Clostridia;Clostridiales                                                       | 0.63 |
| OTU_288 | Bacteria;Firmicutes;Erysipelotrichia;Erysipelotrichales;Erysipelotrichaceae                        | 0.58 |
| OTU_289 | Bacteria;Proteobacteria;Alphaproteobacteria;Rhodospirillales;Rhodospirillaceae                     | 0.58 |
| OTU_290 | Bacteria;Firmicutes;Clostridia;Clostridiales;Ruminococcaceae                                       | 0.98 |
| OTU_291 | Bacteria;Firmicutes;Clostridia;Clostridiales                                                       | 0.9  |
| OTU_292 | Bacteria;Firmicutes;Clostridia;Clostridiales;Ruminococcaceae;Pseudoflavonifractor                  | 0.73 |
| OTU_293 | Bacteria;Firmicutes;Bacilli;Lactobacillales;Lactobacillaceae;Lactobacillus                         | 0.99 |
| OTU_294 | Bacteria;Firmicutes;Erysipelotrichia;Erysipelotrichales;Erysipelotrichaceae                        | 0.64 |
| OTU_295 | Bacteria;Firmicutes;Clostridia;Clostridiales                                                       | 0.54 |
| OTU_296 | Bacteria;Bacteroidetes;Bacteroidia;Bacteroidales;Porphyromonadaceae;Barnesiella                    | 0.95 |
| OTU_297 | Bacteria;Bacteroidetes;Bacteroidia;Bacteroidales;Porphyromonadaceae;Butyricimonas                  | 1    |
| OTU_298 | Bacteria;Firmicutes;Clostridia;Clostridiales;Ruminococcaceae;Ruminococcus                          | 1    |
| OTU_299 | Bacteria;Firmicutes;Clostridia;Clostridiales;Lachnospiraceae                                       | 0.94 |
| OTU_300 | Bacteria;Bacteroidetes;Bacteroidia;Bacteroidales;Prevotellaceae;Prevotella                         | 1    |
| OTU_301 | Bacteria;Actinobacteria;Actinobacteria;Coriobacteriales;Coriobacteriaceae                          | 0.92 |
| OTU_302 | Bacteria;Actinobacteria;Actinobacteria;Coriobacteriales;Coriobacteriaceae;Atopobium                | 1    |
| OTU_303 | Bacteria;Bacteroidetes;Bacteroidia;Bacteroidales;Porphyromonadaceae;Butyricimonas                  | 1    |
| OTU_304 | Bacteria;Bacteroidetes;Bacteroidia;Bacteroidales;Bacteroidaceae;Bacteroides                        | 1    |
| OTU_305 | Bacteria;Firmicutes;Negativicutes;Selenomonadales;Veillonellaceae;Megaspheera                      | 1    |

|         |                                                                                                        |      |
|---------|--------------------------------------------------------------------------------------------------------|------|
| OTU_306 | Bacteria;Firmicutes;Negativicutes;Selenomonadales;Veillonellaceae;Megasphaera                          | 1    |
| OTU_307 | Bacteria;Proteobacteria;Alphaproteobacteria;Rhizobiales;Hyphomicrobiaceae;Gemmiger                     | 0.61 |
| OTU_308 | Bacteria;Firmicutes;Clostridia;Clostridiales;Ruminococcaceae;Oscillibacter                             | 0.98 |
| OTU_309 | Bacteria;Firmicutes;Clostridia;Clostridiales;Lachnospiraceae;Clostridium XIVb                          | 0.94 |
| OTU_310 | Bacteria;Firmicutes;Clostridia;Clostridiales;Ruminococcaceae                                           | 1    |
| OTU_311 | Bacteria;Firmicutes;Clostridia;Clostridiales;Eubacteriaceae;Eubacterium                                | 0.75 |
| OTU_312 | Bacteria;Lentisphaerae;Lentisphaeria;Victivallales;Victivallaceae;Victivallis                          | 1    |
| OTU_313 | Bacteria;Bacteroidetes;Bacteroidia;Bacteroidales;Porphyromonadaceae;Parabacteroides                    | 0.59 |
| OTU_314 | Bacteria;Bacteroidetes;Bacteroidia;Bacteroidales;Prevotellaceae;Prevotella                             | 1    |
| OTU_315 | Bacteria;Firmicutes;Clostridia;Clostridiales                                                           | 0.98 |
| OTU_316 | Bacteria;Firmicutes;Clostridia;Clostridiales;Ruminococcaceae;Anaerotruncus                             | 1    |
| OTU_317 | Bacteria;Actinobacteria;Actinobacteria;Actinomycetales;Actinomycetaceae;Actinomyces                    | 1    |
| OTU_318 | Bacteria;Firmicutes;Erysipelotrichia;Erysipelotrichales;Erysipelotrichaceae;Clostridium XVIII          | 1    |
| OTU_319 | Bacteria;Bacteroidetes;Bacteroidia;Bacteroidales;Prevotellaceae;Prevotella                             | 0.99 |
| OTU_320 | Bacteria;Actinobacteria;Actinobacteria;Coriobacteriales;Coriobacteriaceae;Collinsella                  | 1    |
| OTU_321 | Bacteria;Firmicutes;Clostridia;Clostridiales;Ruminococcaceae                                           | 0.92 |
| OTU_322 | Bacteria;Firmicutes                                                                                    | 0.89 |
| OTU_323 | Bacteria;Firmicutes;Clostridia;Clostridiales;Ruminococcaceae;Clostridium III                           | 0.59 |
| OTU_324 | Bacteria;Firmicutes;Negativicutes;Selenomonadales;Acidaminococcaceae;Acidaminococcus                   | 1    |
| OTU_325 | Bacteria;Bacteroidetes;Bacteroidia;Bacteroidales;Prevotellaceae;Prevotella                             | 0.91 |
| OTU_326 | Bacteria;Bacteroidetes;Bacteroidia;Bacteroidales;Bacteroidaceae;Bacteroides                            | 1    |
| OTU_327 | Bacteria;Firmicutes;Clostridia;Clostridiales;Ruminococcaceae                                           | 0.94 |
| OTU_328 | Bacteria;Bacteroidetes;Bacteroidia;Bacteroidales;Porphyromonadaceae                                    | 0.89 |
| OTU_329 | Bacteria;Firmicutes;Negativicutes;Selenomonadales;Veillonellaceae;Megasphaera                          | 1    |
| OTU_330 | Bacteria;Firmicutes;Bacilli;Lactobacillales;Lactobacillaceae;Lactobacillus                             | 1    |
| OTU_331 | Bacteria;Firmicutes;Negativicutes;Selenomonadales;Veillonellaceae;Dialister                            | 0.97 |
| OTU_332 | Bacteria;Firmicutes;Clostridia;Clostridiales                                                           | 0.99 |
| OTU_333 | Bacteria                                                                                               | 1    |
| OTU_334 | Bacteria;Firmicutes;Negativicutes;Selenomonadales;Veillonellaceae;Allisonella                          | 1    |
| OTU_335 | Bacteria;Proteobacteria;Alphaproteobacteria                                                            | 0.89 |
| OTU_336 | Bacteria;Firmicutes;Erysipelotrichia;Erysipelotrichales;Erysipelotrichaceae;Erysipelotrichaceae_incert | 1    |
| OTU_337 | Bacteria;Firmicutes;Clostridia;Clostridiales                                                           | 0.78 |
| OTU_338 | Bacteria;Proteobacteria;Alphaproteobacteria;Rhodospirillales;Rhodospirillaceae                         | 0.64 |
| OTU_339 | Bacteria;Bacteroidetes;Bacteroidia;Bacteroidales;Bacteroidaceae;Bacteroides                            | 0.97 |
| OTU_340 | Bacteria;Firmicutes;Clostridia;Clostridiales;Ruminococcaceae;Papillibacter                             | 0.52 |
| OTU_341 | Bacteria;Firmicutes;Erysipelotrichia;Erysipelotrichales;Erysipelotrichaceae;Holdemania                 | 0.62 |
| OTU_342 | Bacteria;Bacteroidetes;Bacteroidia;Bacteroidales;Bacteroidaceae;Bacteroides                            | 1    |
| OTU_343 | Bacteria;Actinobacteria;Actinobacteria;Coriobacteriales;Coriobacteriaceae;Olsenella                    | 0.89 |
| OTU_344 | Bacteria;Firmicutes;Clostridia;Clostridiales;Clostridiales_Incertae Sedis XIII                         | 0.59 |
| OTU_345 | Bacteria;Bacteroidetes;Bacteroidia;Bacteroidales;Prevotellaceae                                        | 0.98 |
| OTU_346 | Bacteria;Firmicutes;Bacilli;Lactobacillales;Streptococcaceae;Streptococcus                             | 1    |
| OTU_347 | Bacteria;Firmicutes;Clostridia;Clostridiales;Ruminococcaceae;Anaerotruncus                             | 0.68 |
| OTU_348 | Bacteria;Firmicutes;Clostridia;Clostridiales                                                           | 0.93 |
| OTU_349 | Bacteria;Firmicutes;Clostridia;Clostridiales;Clostridiales_Incertae Sedis XIII;Mogibacterium           | 1    |
| OTU_350 | Bacteria;Bacteroidetes;Bacteroidia;Bacteroidales;Porphyromonadaceae                                    | 0.96 |
| OTU_351 | Bacteria;Firmicutes;Clostridia;Clostridiales;Ruminococcaceae                                           | 0.98 |
| OTU_352 | Bacteria;Firmicutes;Clostridia;Clostridiales;Ruminococcaceae                                           | 0.85 |
| OTU_353 | Bacteria;Firmicutes;Clostridia;Clostridiales                                                           | 0.71 |
| OTU_354 | Bacteria;Bacteroidetes;Bacteroidia;Bacteroidales;Prevotellaceae;Paraprevotella                         | 0.59 |
| OTU_355 | Bacteria;Bacteroidetes;Bacteroidia;Bacteroidales;Porphyromonadaceae;Barnesiella                        | 0.78 |
| OTU_356 | Bacteria;Firmicutes;Clostridia;Clostridiales;Lachnospiraceae;Clostridium XIVa                          | 0.78 |

|         |                                                                                                    |      |
|---------|----------------------------------------------------------------------------------------------------|------|
| OTU_357 | Bacteria;Actinobacteria;Actinobacteria;Coriobacteriales;Coriobacteriaceae;Adlercreutzia            | 0.56 |
| OTU_358 | Bacteria;Proteobacteria;Deltaproteobacteria                                                        | 0.7  |
| OTU_359 | Bacteria                                                                                           | 1    |
| OTU_360 | Bacteria;Actinobacteria;Actinobacteria;Bifidobacteriales;Bifidobacteriaceae;Bifidobacterium        | 1    |
| OTU_361 | Bacteria;Bacteroidetes;Bacteroidia;Bacteroidales;Prevotellaceae                                    | 0.99 |
| OTU_362 | Bacteria                                                                                           | 0.9  |
| OTU_363 | Bacteria;Firmicutes;Clostridia;Clostridiales                                                       | 0.82 |
| OTU_364 | Bacteria;Bacteroidetes;Bacteroidia;Bacteroidales;Porphyromonadaceae;Barnesiella                    | 0.88 |
| OTU_365 | Bacteria;Proteobacteria;Betaproteobacteria;Burkholderiales;Comamonadaceae;Comamonas                | 0.99 |
| OTU_366 | Bacteria;Proteobacteria;Deltaproteobacteria;Desulfovibrionales;Desulfomicrobiaceae;Desulfomicrobiu | 0.56 |
| OTU_367 | Bacteria;Verrucomicrobia;Verrucomicrobiae;Verrucomicrobiales;Verrucomicrobiaceae;Akkermansia       | 0.96 |
| OTU_368 | Bacteria;Firmicutes;Clostridia;Clostridiales                                                       | 1    |
| OTU_369 | Unclassified                                                                                       |      |
| OTU_370 | Bacteria;Firmicutes;Clostridia;Clostridiales;Ruminococcaceae                                       | 0.85 |
| OTU_371 | Bacteria;Lentisphaerae;Lentisphaeria;Victivallales;Victivallaceae;Victivallis                      | 0.53 |
| OTU_372 | Bacteria;Firmicutes;Negativicutes;Selenomonadales;Acidaminococcaceae;Acidaminococcus               | 1    |
| OTU_373 | Bacteria;Fusobacteria;Fusobacteria;Fusobacteriales;Fusobacteriaceae;Fusobacterium                  | 1    |
| OTU_374 | Bacteria;Bacteroidetes;Bacteroidia;Bacteroidales;Prevotellaceae;Prevotella                         | 0.63 |
| OTU_375 | Bacteria;Elusimicrobia;Elusimicrobia;Elusimicrobiales;Elusimicrobiaceae;Elusimicrobium             | 1    |
| OTU_376 | Bacteria;Deinococcus-Thermus;Deinococci;Thermales;Thermaceae;Thermus                               | 1    |
| OTU_377 | Bacteria;Firmicutes;Clostridia;Clostridiales;Lachnospiraceae;Lachnospiracea_incertae_sedis         | 0.77 |
| OTU_378 | Bacteria;Firmicutes                                                                                | 0.8  |
| OTU_379 | Bacteria;Firmicutes;Clostridia;Clostridiales;Peptococcaceae 1;Peptococcus                          | 0.55 |
| OTU_380 | Bacteria;Bacteroidetes;Bacteroidia;Bacteroidales;Prevotellaceae;Prevotella                         | 0.97 |
| OTU_381 | Bacteria;Firmicutes                                                                                | 0.82 |
| OTU_382 | Bacteria;Bacteroidetes;Bacteroidia;Bacteroidales;Prevotellaceae;Paraprevotella                     | 0.79 |
| OTU_383 | Bacteria;Firmicutes;Clostridia;Clostridiales;Ruminococcaceae;Clostridium IV                        | 0.77 |
| OTU_384 | Bacteria;Synergistetes;Synergistia;Synergistales;Synergistaceae;Pyramidobacter                     | 1    |
| OTU_385 | Bacteria;Firmicutes;Clostridia;Clostridiales;Ruminococcaceae                                       | 1    |
| OTU_386 | Bacteria;Firmicutes                                                                                | 0.69 |
| OTU_387 | Bacteria;Firmicutes;Clostridia;Clostridiales;Ruminococcaceae;Acetivibrio                           | 0.53 |
| OTU_388 | Bacteria;Bacteroidetes;Bacteroidia;Bacteroidales;Bacteroidaceae;Bacteroides                        | 0.99 |
| OTU_389 | Bacteria;Firmicutes;Bacilli;Lactobacillales;Lactobacillaceae;Lactobacillus                         | 1    |
| OTU_390 | Bacteria;Actinobacteria;Actinobacteria;Coriobacteriales;Coriobacteriaceae                          | 1    |
| OTU_391 | Bacteria;Actinobacteria;Actinobacteria;Coriobacteriales;Coriobacteriaceae                          | 0.93 |
| OTU_392 | Bacteria;Firmicutes;Clostridia;Clostridiales;Lachnospiraceae;Pseudobutyrvibrio                     | 0.53 |
| OTU_393 | Bacteria;Bacteroidetes;Bacteroidia;Bacteroidales;Porphyromonadaceae;Butyricimonas                  | 1    |
| OTU_394 | Bacteria;Lentisphaerae;Lentisphaeria;Victivallales;Victivallaceae;Victivallis                      | 1    |
| OTU_395 | Bacteria;Firmicutes;Clostridia;Clostridiales;Lachnospiraceae                                       | 1    |
| OTU_396 | Bacteria;Firmicutes;Clostridia;Clostridiales                                                       | 0.83 |
| OTU_397 | Bacteria;Firmicutes;Clostridia;Clostridiales;Ruminococcaceae                                       | 1    |
| OTU_398 | Bacteria;Firmicutes;Clostridia;Clostridiales;Ruminococcaceae;Butyricoccus                          | 1    |
| OTU_399 | Bacteria;Bacteroidetes;Bacteroidia;Bacteroidales;Porphyromonadaceae                                | 0.82 |
| OTU_400 | Bacteria;Firmicutes;Clostridia;Clostridiales;Ruminococcaceae                                       | 0.94 |
| OTU_401 | Bacteria;Firmicutes;Erysipelotrichia;Erysipelotrichales;Erysipelotrichaceae;Bulleidia              | 0.75 |
| OTU_402 | Bacteria;Firmicutes;Clostridia;Clostridiales;Lachnospiraceae;Clostridium XIVb                      | 1    |
| OTU_403 | Bacteria;Firmicutes;Clostridia;Clostridiales;Lachnospiraceae;Lachnospiracea_incertae_sedis         | 0.9  |
| OTU_404 | Bacteria;Bacteroidetes;Bacteroidia;Bacteroidales;Bacteroidaceae;Anaerorhabdus                      | 0.63 |
| OTU_405 | Bacteria;Firmicutes;Clostridia                                                                     | 0.51 |
| OTU_406 | Bacteria;Firmicutes;Clostridia;Clostridiales;Lachnospiraceae;Clostridium XIVa                      | 0.55 |
| OTU_407 | Bacteria;Bacteroidetes;Bacteroidia;Bacteroidales;Porphyromonadaceae;Barnesiella                    | 0.97 |

|         |                                                                                                        |      |
|---------|--------------------------------------------------------------------------------------------------------|------|
| OTU_408 | Bacteria;Bacteroidetes                                                                                 | 0.99 |
| OTU_409 | Bacteria;Bacteroidetes;Bacteroidia;Bacteroidales;Bacteroidaceae;Bacteroides                            | 1    |
| OTU_410 | Bacteria;Firmicutes                                                                                    | 0.77 |
| OTU_411 | Bacteria;Proteobacteria;Gammaproteobacteria;Enterobacteriales;Enterobacteriaceae                       | 1    |
| OTU_412 | Bacteria;Proteobacteria;Betaproteobacteria;Burkholderiales;Oxalobacteraceae                            | 0.98 |
| OTU_413 | Bacteria;Bacteroidetes;Bacteroidia;Bacteroidales;Prevotellaceae;Prevotella                             | 1    |
| OTU_414 | Bacteria;Bacteroidetes;Bacteroidia;Bacteroidales;Bacteroidaceae;Bacteroides                            | 1    |
| OTU_415 | Bacteria;Proteobacteria;Betaproteobacteria;Burkholderiales;Sutterellaceae;Parasutterella               | 0.85 |
| OTU_416 | Bacteria;Bacteroidetes;Bacteroidia;Bacteroidales;Prevotellaceae;Prevotella                             | 0.99 |
| OTU_417 | Bacteria;Firmicutes;Erysipelotrichia;Erysipelotrichales;Erysipelotrichaceae;Erysipelotrichaceae_incert | 0.98 |
| OTU_418 | Bacteria;Firmicutes;Clostridia;Clostridiales;Ruminococcaceae;Flavonifractor                            | 0.52 |
| OTU_419 | Bacteria;Firmicutes;Clostridia;Clostridiales                                                           | 0.73 |
| OTU_420 | Bacteria;Firmicutes;Clostridia;Clostridiales;Lachnospiraceae;Cellulosilyticum                          | 0.99 |
| OTU_421 | Bacteria;Actinobacteria;Actinobacteria;Coriobacteriales;Coriobacteriaceae;Gordonibacter                | 1    |
| OTU_422 | Bacteria;Firmicutes;Clostridia;Clostridiales                                                           | 0.62 |
| OTU_423 | Bacteria;Firmicutes;Clostridia;Clostridiales                                                           | 0.6  |
| OTU_424 | Bacteria;Firmicutes;Clostridia;Clostridiales;Ruminococcaceae;Sporobacter                               | 0.56 |
| OTU_425 | Bacteria;Proteobacteria;Gammaproteobacteria;Pasteurellales;Pasteurellaceae;Haemophilus                 | 0.55 |
| OTU_426 | Bacteria;Firmicutes;Clostridia;Clostridiales;Peptostreptococcaceae;Clostridium XI                      | 1    |
| OTU_427 | Bacteria;Proteobacteria;Gammaproteobacteria;Pasteurellales;Pasteurellaceae;Aggregatibacter             | 0.97 |
| OTU_428 | Bacteria;Firmicutes;Bacilli;Lactobacillales;Streptococcaceae;Streptococcus                             | 1    |
| OTU_429 | Bacteria;Firmicutes;Clostridia;Clostridiales                                                           | 0.82 |
| OTU_430 | Bacteria;Bacteroidetes;Bacteroidia;Bacteroidales;Prevotellaceae;Prevotella                             | 0.85 |
| OTU_431 | Bacteria;Firmicutes;Bacilli;Lactobacillales;Lactobacillaceae;Lactobacillus                             | 1    |
| OTU_432 | Bacteria;TM7;TM7_genera_incertae_sedis;TM7_genera_incertae_sedis;TM7_genera_incertae_sedis;T           | 1    |
| OTU_433 | Bacteria                                                                                               | 0.88 |
| OTU_434 | Bacteria;Firmicutes                                                                                    | 0.78 |
| OTU_435 | Bacteria;Proteobacteria;Gammaproteobacteria;Pseudomonadales;Pseudomonadaceae;Pseudomonas               | 1    |
| OTU_436 | Bacteria;Firmicutes;Clostridia;Clostridiales;Lachnospiraceae;Lachnospiracea_incertae_sedis             | 0.75 |
| OTU_437 | Bacteria;Firmicutes;Negativicutes;Selenomonadales;Veillonellaceae;Dialister                            | 1    |
| OTU_438 | Bacteria;Actinobacteria;Actinobacteria;Coriobacteriales;Coriobacteriaceae;Gordonibacter                | 0.51 |
| OTU_439 | Bacteria;TM7;TM7_genera_incertae_sedis;TM7_genera_incertae_sedis;TM7_genera_incertae_sedis;T           | 0.71 |
| OTU_440 | Bacteria;Bacteroidetes;Bacteroidia;Bacteroidales;Porphyromonadaceae;Parabacteroides                    | 1    |
| OTU_441 | Bacteria;Cyanobacteria/Chloroplast;Chloroplast;Chloroplast;Chloroplast;Streptophyta                    | 1    |
| OTU_442 | Bacteria;Firmicutes;Clostridia;Clostridiales;Ruminococcaceae                                           | 0.66 |
| OTU_443 | Bacteria;Firmicutes;Clostridia;Clostridiales;Ruminococcaceae                                           | 0.99 |
| OTU_444 | Bacteria;Actinobacteria;Actinobacteria;Coriobacteriales;Coriobacteriaceae                              | 1    |
| OTU_445 | Bacteria;Firmicutes;Clostridia;Clostridiales;Lachnospiraceae;Anaerostipes                              | 0.66 |
| OTU_446 | Bacteria;Proteobacteria;Epsilonproteobacteria;Campylobacteriales;Campylobacteraceae;Campylobacter      | 1    |
| OTU_447 | Bacteria;Firmicutes;Clostridia;Clostridiales;Clostridiales_Incertae_Sedis XIII;Mogibacterium           | 0.98 |
| OTU_448 | Bacteria;Firmicutes;Clostridia;Clostridiales                                                           | 0.6  |
| OTU_449 | Bacteria;Proteobacteria;Betaproteobacteria;Burkholderiales                                             | 0.95 |
| OTU_450 | Bacteria;Proteobacteria;Alphaproteobacteria                                                            | 0.69 |
| OTU_451 | Bacteria;Actinobacteria;Actinobacteria;Actinomycetales;Micrococcaceae;Rothia                           | 1    |
| OTU_452 | Bacteria;Bacteroidetes;Bacteroidia;Bacteroidales;Porphyromonadaceae;Tannerella                         | 0.54 |
| OTU_453 | Bacteria;Firmicutes;Bacilli;Lactobacillales;Lactobacillaceae;Lactobacillus                             | 1    |
| OTU_454 | Bacteria;Proteobacteria;Alphaproteobacteria;Rhodospirillales;Rhodospirillaceae                         | 0.68 |
| OTU_455 | Bacteria;Firmicutes;Bacilli;Lactobacillales;Enterococcaceae;Vagococcus                                 | 0.97 |
| OTU_456 | Bacteria;Bacteroidetes;Bacteroidia;Bacteroidales;Prevotellaceae;Prevotella                             | 1    |
| OTU_457 | Bacteria;Actinobacteria;Actinobacteria;Coriobacteriales;Coriobacteriaceae;Collinsella                  | 1    |
| OTU_458 | Bacteria;Bacteroidetes;Bacteroidia;Bacteroidales;Prevotellaceae;Prevotella                             | 1    |

|         |                                                                                              |      |
|---------|----------------------------------------------------------------------------------------------|------|
| OTU_459 | Bacteria;Firmicutes;Clostridia;Clostridiales;Ruminococcaceae;Acetivibrio                     | 0.77 |
| OTU_460 | Bacteria;Actinobacteria;Actinobacteria;Coriobacteriales;Coriobacteriaceae;Olsenella          | 0.84 |
| OTU_461 | Bacteria;Firmicutes;Bacilli;Lactobacillales;Leuconostocaceae;Leuconostoc                     | 1    |
| OTU_462 | Bacteria;Firmicutes;Clostridia;Clostridiales;Ruminococcaceae;Flavonifractor                  | 0.53 |
| OTU_463 | Bacteria;Bacteroidetes;Bacteroidia;Bacteroidales;Bacteroidaceae;Bacteroides                  | 0.89 |
| OTU_464 | Bacteria;Firmicutes;Clostridia;Clostridiales;Lachnospiraceae;Clostridium XIVa                | 0.55 |
| OTU_465 | Bacteria;Bacteroidetes;Sphingobacteria;Sphingobacteriales;Chitinophagaceae;Sediminibacterium | 1    |
| OTU_466 | Bacteria;Firmicutes;Clostridia;Clostridiales                                                 | 0.88 |
| OTU_467 | Bacteria;Firmicutes                                                                          | 0.84 |
| OTU_468 | Bacteria;Firmicutes;Erysipelotrichia;Erysipelotrichales;Erysipelotrichaceae                  | 0.75 |
| OTU_469 | Bacteria;Bacteroidetes;Bacteroidia;Bacteroidales;Porphyromonadaceae;Parabacteroides          | 1    |
| OTU_470 | Bacteria;Firmicutes;Negativicutes;Selenomonadales;Veillonellaceae;Mitsuokella                | 1    |
| OTU_471 | Bacteria;Firmicutes;Clostridia;Clostridiales;Ruminococcaceae;Clostridium IV                  | 0.52 |
| OTU_472 | Bacteria;Firmicutes;Clostridia;Clostridiales;Eubacteriaceae;Eubacterium                      | 0.55 |
| OTU_473 | Bacteria;Firmicutes;Bacilli;Lactobacillales;Streptococcaceae;Streptococcus                   | 1    |
| OTU_474 | Bacteria;Firmicutes;Erysipelotrichia;Erysipelotrichales;Erysipelotrichaceae                  | 0.61 |
| OTU_475 | Bacteria;Firmicutes;Clostridia;Clostridiales;Lachnospiraceae                                 | 0.88 |
| OTU_476 | Bacteria;Firmicutes;Clostridia;Clostridiales;Lachnospiraceae;Blautia                         | 1    |
| OTU_477 | Bacteria;Bacteroidetes;Bacteroidia;Bacteroidales;Bacteroidaceae;Bacteroides                  | 0.89 |
| OTU_478 | Bacteria;Firmicutes;Negativicutes;Selenomonadales;Acidaminococcaceae;Phascolarctobacterium   | 0.85 |
| OTU_479 | Bacteria;Bacteroidetes;Bacteroidia;Bacteroidales;Bacteroidaceae;Bacteroides                  | 1    |
| OTU_480 | Bacteria;Firmicutes;Clostridia;Clostridiales;Ruminococcaceae;Clostridium IV                  | 0.85 |
| OTU_481 | Bacteria;Firmicutes;Negativicutes;Selenomonadales;Veillonellaceae;Anaeroglobus               | 1    |
| OTU_482 | Bacteria;Firmicutes;Clostridia;Clostridiales;Ruminococcaceae;Clostridium IV                  | 1    |
| OTU_483 | Bacteria;Proteobacteria;Gammaproteobacteria;Xanthomonadales;Xanthomonadaceae;Stenotrophomon  | 1    |
| OTU_484 | Bacteria;Bacteroidetes;Flavobacteria;Flavobacteriales                                        | 0.63 |
| OTU_485 | Bacteria;Bacteroidetes;Bacteroidia;Bacteroidales;Prevotellaceae;Hallella                     | 0.61 |
| OTU_486 | Bacteria;Firmicutes;Clostridia;Clostridiales;Lachnospiraceae;Clostridium XIVb                | 1    |
| OTU_487 | Bacteria;Bacteroidetes;Bacteroidia;Bacteroidales;Porphyromonadaceae;Parabacteroides          | 1    |
| OTU_488 | Bacteria;Bacteroidetes                                                                       | 1    |
| OTU_489 | Bacteria                                                                                     | 0.83 |
| OTU_490 | Bacteria;Firmicutes;Erysipelotrichia;Erysipelotrichales;Erysipelotrichaceae                  | 0.79 |
| OTU_491 | Bacteria;Proteobacteria;Gammaproteobacteria;Pseudomonadales;Moraxellaceae;Acinetobacter      | 1    |
| OTU_492 | Bacteria;Firmicutes;Bacilli;Lactobacillales;Streptococcaceae;Lactococcus                     | 1    |
| OTU_493 | Bacteria;Firmicutes;Clostridia;Clostridiales                                                 | 0.74 |
| OTU_494 | Bacteria;Firmicutes;Bacilli;Lactobacillales;Streptococcaceae;Streptococcus                   | 1    |
| OTU_495 | Bacteria;Firmicutes;Clostridia;Clostridiales;Ruminococcaceae;Flavonifractor                  | 0.78 |
| OTU_496 | Bacteria                                                                                     | 1    |
| OTU_497 | Bacteria;Firmicutes;Clostridia;Clostridiales;Ruminococcaceae;Oscillibacter                   | 1    |
| OTU_498 | Bacteria;Firmicutes;Clostridia;Clostridiales;Ruminococcaceae                                 | 0.71 |
| OTU_499 | Bacteria;Firmicutes;Clostridia;Clostridiales;Lachnospiraceae;Parasporobacterium              | 0.54 |
| OTU_500 | Bacteria;Proteobacteria;Gammaproteobacteria;Pasteurellales;Pasteurellaceae;Aggregatibacter   | 0.82 |
| OTU_501 | Bacteria;Bacteroidetes;Bacteroidia;Bacteroidales;Prevotellaceae                              | 0.98 |
| OTU_502 | Bacteria;Firmicutes                                                                          | 0.69 |
| OTU_503 | Bacteria;Bacteroidetes;Flavobacteria;Flavobacteriales;Flavobacteriaceae;Chryseobacterium     | 1    |
| OTU_504 | Bacteria;Firmicutes;Clostridia;Clostridiales;Ruminococcaceae;Clostridium IV                  | 0.99 |
| OTU_505 | Bacteria;Firmicutes;Clostridia;Clostridiales;Ruminococcaceae                                 | 0.6  |
| OTU_506 | Bacteria;Firmicutes;Clostridia;Clostridiales;Ruminococcaceae;Flavonifractor                  | 0.55 |
| OTU_507 | Bacteria;Proteobacteria;Deltaproteobacteria;Desulfovibrionales;Desulfovibrionaceae           | 0.79 |
| OTU_508 | Bacteria;Firmicutes;Clostridia;Clostridiales                                                 | 0.83 |
| OTU_509 | Bacteria;Firmicutes;Clostridia;Clostridiales;Peptococcaceae 1;Peptococcus                    | 0.61 |



|         |                                                                                          |      |
|---------|------------------------------------------------------------------------------------------|------|
| OTU_510 | Bacteria;Firmicutes;Clostridia;Clostridiales;Ruminococcaceae;Faecalibacterium            | 0.68 |
| OTU_511 | Bacteria;Bacteroidetes;Bacteroidia;Bacteroidales;Bacteroidaceae;Bacteroides              | 1    |
| OTU_512 | Bacteria;Firmicutes;Negativicutes;Selenomonadales;Veillonellaceae;Megasphaera            | 1    |
| OTU_513 | Bacteria;Firmicutes;Clostridia;Clostridiales;Ruminococcaceae;Anaerotruncus               | 0.87 |
| OTU_514 | Bacteria;Firmicutes                                                                      | 0.7  |
| OTU_515 | Bacteria;Firmicutes;Clostridia;Clostridiales;Ruminococcaceae;Ruminococcus                | 0.55 |
| OTU_516 | Bacteria;Proteobacteria;Gammaproteobacteria;Vibrionales;Vibrionaceae;Vibrio              | 1    |
| OTU_517 | Bacteria;Proteobacteria;Betaproteobacteria;Burkholderiales;Sutterellaceae;Parasutterella | 0.96 |
| OTU_518 | Bacteria;Firmicutes;Clostridia;Clostridiales;Ruminococcaceae                             | 0.9  |
| OTU_519 | Bacteria;Firmicutes;Clostridia;Clostridiales;Clostridiales_Incertae Sedis XI;Parvimonas  | 1    |
| OTU_520 | Bacteria;Bacteroidetes;Bacteroidia;Bacteroidales;Prevotellaceae;Prevotella               | 1    |
| OTU_521 | Bacteria;Firmicutes;Clostridia;Clostridiales;Lachnospiraceae;Anaerostipes                | 1    |
| OTU_522 | Bacteria;Firmicutes;Clostridia;Clostridiales;Ruminococcaceae;Anaerofilum                 | 0.96 |
| OTU_523 | Bacteria;Proteobacteria;Alphaproteobacteria;Rhodospirillales;Rhodospirillaceae           | 0.69 |
| OTU_524 | Bacteria;Firmicutes;Clostridia;Clostridiales                                             | 0.84 |
| OTU_525 | Bacteria;Firmicutes;Clostridia;Clostridiales                                             | 0.69 |
| OTU_526 | Bacteria;Firmicutes;Clostridia;Clostridiales;Ruminococcaceae;Clostridium IV              | 0.52 |
| OTU_527 | Bacteria                                                                                 | 0.94 |
| OTU_528 | Bacteria;Firmicutes;Clostridia;Clostridiales;Ruminococcaceae;Clostridium IV              | 0.89 |
| OTU_529 | Bacteria;Proteobacteria;Gammaproteobacteria;Aeromonadales;Aeromonadaceae;Aeromonas       | 1    |
| OTU_530 | Bacteria;Verrucomicrobia;Opitutae;Puniceococcales;Puniceococcaceae;Cerasicoccus          | 0.66 |
| OTU_531 | Bacteria;Bacteroidetes;Bacteroidia;Bacteroidales;Prevotellaceae;Prevotella               | 1    |
| OTU_532 | Bacteria;Bacteroidetes;Bacteroidia;Bacteroidales;Porphyromonadaceae                      | 1    |
| OTU_533 | Bacteria;Firmicutes;Erysipelotrichia;Erysipelotrichales;Erysipelotrichaceae              | 0.81 |
| OTU_534 | Bacteria;Firmicutes;Clostridia;Clostridiales                                             | 0.84 |
| OTU_535 | Bacteria;Bacteroidetes;Bacteroidia;Bacteroidales;Rikenellaceae;Alistipes                 | 1    |
| OTU_536 | Bacteria                                                                                 | 0.95 |
| OTU_537 | Bacteria;Firmicutes;Clostridia;Clostridiales                                             | 0.96 |
| OTU_538 | Bacteria;Firmicutes;Clostridia;Clostridiales;Eubacteriaceae;Eubacterium                  | 1    |
| OTU_539 | Bacteria;Bacteroidetes;Bacteroidia;Bacteroidales;Porphyromonadaceae;Barnesiella          | 0.75 |
| OTU_540 | Bacteria;Firmicutes;Clostridia;Clostridiales;Ruminococcaceae                             | 0.97 |
| OTU_541 | Bacteria;Firmicutes                                                                      | 0.74 |
| OTU_542 | Bacteria;Bacteroidetes;Bacteroidia;Bacteroidales;Rikenellaceae;Alistipes                 | 1    |
| OTU_543 | Bacteria;Bacteroidetes;Bacteroidia;Bacteroidales;Prevotellaceae;Paraprevotella           | 0.8  |
| OTU_544 | Bacteria;Firmicutes;Clostridia;Clostridiales;Ruminococcaceae;Oscillibacter               | 0.88 |
| OTU_545 | Bacteria;Firmicutes;Bacilli;Lactobacillales;Lactobacillaceae;Lactobacillus               | 1    |
| OTU_546 | Bacteria;Bacteroidetes;Bacteroidia;Bacteroidales;Prevotellaceae;Prevotella               | 1    |
| OTU_547 | Bacteria;Proteobacteria;Deltaproteobacteria                                              | 0.7  |
| OTU_548 | Bacteria;Firmicutes;Negativicutes;Selenomonadales;Veillonellaceae;Dialister              | 0.99 |
| OTU_549 | Bacteria;Firmicutes                                                                      | 0.69 |
| OTU_550 | Bacteria;Firmicutes;Clostridia;Clostridiales;Clostridiaceae 1;Clostridium sensu stricto  | 1    |
| OTU_551 | Bacteria;Bacteroidetes;Bacteroidia;Bacteroidales;Porphyromonadaceae;Butyricimonas        | 1    |
| OTU_552 | Bacteria;Bacteroidetes;Bacteroidia;Bacteroidales;Bacteroidaceae;Bacteroides              | 1    |
| OTU_553 | Bacteria;Firmicutes;Clostridia;Clostridiales;Ruminococcaceae;Ruminococcus                | 1    |
| OTU_554 | Bacteria;Bacteroidetes;Bacteroidia;Bacteroidales;Prevotellaceae;Prevotella               | 0.99 |
| OTU_555 | Bacteria;Firmicutes;Clostridia;Clostridiales;Ruminococcaceae                             | 0.79 |
| OTU_556 | Bacteria;Firmicutes;Clostridia;Clostridiales;Ruminococcaceae;Clostridium IV              | 0.96 |
| OTU_557 | Bacteria;Bacteroidetes;Bacteroidia;Bacteroidales;Porphyromonadaceae;Barnesiella          | 0.82 |
| OTU_558 | Bacteria;Firmicutes;Clostridia;Clostridiales;Lachnospiraceae;Butyrivibrio                | 0.72 |
| OTU_559 | Bacteria;Firmicutes;Negativicutes;Selenomonadales;Veillonellaceae;Veillonella            | 1    |
| OTU_560 | Bacteria;Actinobacteria;Actinobacteria;Coriobacteriales;Coriobacteriaceae;Gordonibacter  | 0.84 |

|         |                                                                                                        |      |
|---------|--------------------------------------------------------------------------------------------------------|------|
| OTU_561 | Bacteria;Firmicutes;Clostridia;Clostridiales;Peptococcaceae 1;Peptococcus                              | 0.9  |
| OTU_562 | Bacteria;Firmicutes;Clostridia;Clostridiales;Ruminococcaceae                                           | 1    |
| OTU_563 | Bacteria;Firmicutes;Clostridia;Clostridiales;Clostridiales_Incertae Sedis XI                           | 0.58 |
| OTU_564 | Bacteria;Firmicutes;Clostridia;Clostridiales;Ruminococcaceae;Clostridium IV                            | 0.59 |
| OTU_565 | Bacteria;Firmicutes;Erysipelotrichia;Erysipelotrichales;Erysipelotrichaceae;Turicibacter               | 0.63 |
| OTU_566 | Bacteria;Firmicutes;Clostridia;Clostridiales                                                           | 0.52 |
| OTU_567 | Bacteria;Proteobacteria;Deltaproteobacteria;Desulfovibrionales;Desulfovibrionaceae;Desulfovibrio       | 0.92 |
| OTU_568 | Bacteria;Firmicutes;Clostridia;Clostridiales;Ruminococcaceae;Clostridium IV                            | 0.92 |
| OTU_569 | Bacteria;Firmicutes;Clostridia;Clostridiales;Ruminococcaceae                                           | 0.57 |
| OTU_570 | Bacteria;Proteobacteria;Gammaproteobacteria;Enterobacteriales;Enterobacteriaceae;Plesiomonas           | 0.82 |
| OTU_571 | Bacteria;Bacteroidetes;Bacteroidia;Bacteroidales;Prevotellaceae;Prevotella                             | 0.94 |
| OTU_572 | Bacteria;Firmicutes;Clostridia;Clostridiales;Ruminococcaceae                                           | 0.92 |
| OTU_573 | Bacteria;Firmicutes;Clostridia;Clostridiales                                                           | 0.99 |
| OTU_574 | Bacteria;Firmicutes                                                                                    | 0.79 |
| OTU_575 | Bacteria;Bacteroidetes;Bacteroidia;Bacteroidales;Bacteroidaceae;Bacteroides                            | 1    |
| OTU_576 | Bacteria;Firmicutes;Clostridia;Clostridiales;Ruminococcaceae                                           | 0.89 |
| OTU_577 | Bacteria;Firmicutes                                                                                    | 0.92 |
| OTU_578 | Bacteria;Firmicutes;Clostridia;Clostridiales;Ruminococcaceae;Anaerofilum                               | 0.51 |
| OTU_579 | Bacteria;Verrucomicrobia;Opitutae;Puniceococcales;Puniceococcaceae                                     | 0.72 |
| OTU_580 | Bacteria;Firmicutes;Clostridia;Clostridiales                                                           | 0.81 |
| OTU_581 | Bacteria;Firmicutes;Clostridia;Clostridiales;Ruminococcaceae                                           | 0.79 |
| OTU_582 | Bacteria;Proteobacteria;Deltaproteobacteria;Desulfovibrionales;Desulfovibrionaceae                     | 0.87 |
| OTU_583 | Bacteria;Lentisphaerae;Lentisphaeria;Victivallales;Victivallaceae;Victivallis                          | 0.79 |
| OTU_584 | Bacteria;Verrucomicrobia;Opitutae;Puniceococcales;Puniceococcaceae;Cerasicoccus                        | 0.54 |
| OTU_585 | Bacteria;Bacteroidetes;Bacteroidia;Bacteroidales;Bacteroidaceae;Bacteroides                            | 1    |
| OTU_586 | Bacteria;Firmicutes;Clostridia;Clostridiales                                                           | 0.72 |
| OTU_587 | Bacteria;Firmicutes;Clostridia;Clostridiales;Ruminococcaceae;Clostridium IV                            | 0.76 |
| OTU_588 | Bacteria;Firmicutes;Erysipelotrichia;Erysipelotrichales;Erysipelotrichaceae                            | 1    |
| OTU_589 | Bacteria;Proteobacteria;Betaproteobacteria;Neisseriales;Neisseriaceae;Neisseria                        | 1    |
| OTU_590 | Bacteria;Firmicutes;Erysipelotrichia;Erysipelotrichales;Erysipelotrichaceae;Erysipelotrichaceae_incert | 1    |
| OTU_591 | Bacteria;Firmicutes;Clostridia;Clostridiales;Lachnospiraceae;Cellulosilyticum                          | 0.67 |
| OTU_592 | Bacteria;Proteobacteria;Gammaproteobacteria;Aeromonadales;Succinivibrionaceae;Succinivibrio            | 0.99 |
| OTU_593 | Bacteria;Firmicutes;Clostridia                                                                         | 0.53 |
| OTU_594 | Bacteria;Firmicutes;Clostridia;Clostridiales;Ruminococcaceae;Clostridium III                           | 0.51 |
| OTU_595 | Bacteria;Bacteroidetes;Bacteroidia;Bacteroidales;Porphyromonadaceae;Barnesiella                        | 0.62 |
| OTU_596 | Bacteria;Firmicutes;Clostridia;Clostridiales;Ruminococcaceae;Clostridium IV                            | 0.57 |
| OTU_597 | Bacteria;Firmicutes;Negativicutes;Selenomonadales;Acidaminococcaceae;Acidaminococcus                   | 1    |
| OTU_598 | Bacteria;Fusobacteria;Fusobacteria;Fusobacteriales;Leptotrichiaceae;Leptotrichia                       | 1    |
| OTU_599 | Bacteria;Bacteroidetes;Bacteroidia;Bacteroidales;Porphyromonadaceae;Barnesiella                        | 0.57 |
| OTU_600 | Bacteria;Firmicutes;Clostridia;Clostridiales;Lachnospiraceae;Oribacterium                              | 1    |
| OTU_601 | Bacteria;Actinobacteria;Actinobacteria;Bifidobacteriales;Bifidobacteriaceae;Scardovia                  | 1    |
| OTU_602 | Bacteria;Firmicutes;Clostridia;Clostridiales                                                           | 0.87 |
| OTU_603 | Bacteria;Fusobacteria;Fusobacteria;Fusobacteriales;Leptotrichiaceae;Leptotrichia                       | 0.98 |
| OTU_604 | Bacteria                                                                                               | 0.84 |
| OTU_605 | Bacteria;Bacteroidetes;Bacteroidia;Bacteroidales;Marinilabiaceae;Anaerophaga                           | 0.58 |
| OTU_606 | Bacteria;Firmicutes;Clostridia;Clostridiales;Ruminococcaceae                                           | 0.91 |
| OTU_607 | Bacteria;Firmicutes;Clostridia;Clostridiales;Lachnospiraceae;Clostridium XIVa                          | 0.56 |
| OTU_608 | Bacteria;Proteobacteria;Betaproteobacteria;Burkholderiales;Sutterellaceae                              | 0.71 |
| OTU_609 | Bacteria;Synergistetes;Synergistia;Synergistales;Synergistaceae;Pyramidobacter                         | 0.76 |
| OTU_610 | Bacteria;Firmicutes;Clostridia;Clostridiales                                                           | 0.73 |
| OTU_611 | Bacteria;Bacteroidetes;Bacteroidia;Bacteroidales;Bacteroidaceae;Bacteroides                            | 1    |

|         |                                                                                                   |      |
|---------|---------------------------------------------------------------------------------------------------|------|
| OTU_612 | Bacteria;Firmicutes;Clostridia;Clostridiales                                                      | 0.7  |
| OTU_613 | Bacteria;Firmicutes;Clostridia;Clostridiales;Ruminococcaceae;Clostridium IV                       | 0.64 |
| OTU_614 | Bacteria;Firmicutes;Clostridia;Clostridiales;Ruminococcaceae                                      | 0.67 |
| OTU_615 | Bacteria;Firmicutes;Clostridia;Clostridiales;Lachnospiraceae;Lachnospiracea_incertae_sedis        | 0.73 |
| OTU_616 | Bacteria;Firmicutes;Clostridia;Clostridiales;Lachnospiraceae;Lachnospiracea_incertae_sedis        | 0.72 |
| OTU_617 | Bacteria;Firmicutes;Clostridia;Clostridiales;Eubacteriaceae;Eubacterium                           | 0.56 |
| OTU_618 | Bacteria;Bacteroidetes;Flavobacteria;Flavobacteriales                                             | 0.64 |
| OTU_619 | Bacteria;Firmicutes;Clostridia;Clostridiales;Ruminococcaceae;Clostridium IV                       | 0.72 |
| OTU_620 | Bacteria;Firmicutes;Erysipelotrichia;Erysipelotrichales;Erysipelotrichaceae                       | 0.73 |
| OTU_621 | Bacteria;Bacteroidetes;Bacteroidia;Bacteroidales;Porphyromonadaceae;Barnesiella                   | 0.51 |
| OTU_622 | Bacteria;Bacteroidetes;Flavobacteria;Flavobacteriales;Flavobacteriaceae                           | 0.52 |
| OTU_623 | Bacteria;Synergistetes;Synergistia;Synergistales;Synergistaceae;Cloacibacillus                    | 1    |
| OTU_624 | Bacteria;Bacteroidetes;Bacteroidia;Bacteroidales;Rikenellaceae;Alistipes                          | 1    |
| OTU_625 | Bacteria;Firmicutes;Erysipelotrichia;Erysipelotrichales;Erysipelotrichaceae;Clostridium XVIII     | 0.86 |
| OTU_626 | Bacteria;Proteobacteria;Betaproteobacteria;Burkholderiales;Sutterellaceae;Parasutterella          | 0.97 |
| OTU_627 | Bacteria;Firmicutes;Clostridia;Clostridiales                                                      | 0.58 |
| OTU_628 | Bacteria;Bacteroidetes;Bacteroidia;Bacteroidales;Porphyromonadaceae;Odoribacter                   | 0.98 |
| OTU_629 | Bacteria;Firmicutes                                                                               | 1    |
| OTU_630 | Bacteria;Proteobacteria;Betaproteobacteria;Burkholderiales;Oxalobacteraceae;Janthinobacterium     | 0.97 |
| OTU_631 | Bacteria;Verrucomicrobia;Verrucomicrobiae;Verrucomicrobiales;Verrucomicrobiaceae;Akkermansia      | 1    |
| OTU_632 | Bacteria;Firmicutes;Clostridia;Clostridiales                                                      | 0.52 |
| OTU_633 | Bacteria;Proteobacteria;Alphaproteobacteria;Rhizobiales;Rhizobiaceae;Rhizobium                    | 1    |
| OTU_634 | Bacteria;Firmicutes;Clostridia;Clostridiales;Ruminococcaceae;Butyricoccus                         | 1    |
| OTU_635 | Bacteria;TM7;TM7_genera_incertae_sedis;TM7_genera_incertae_sedis;TM7_genera_incertae_sedis;T      | 1    |
| OTU_636 | Bacteria;Firmicutes;Clostridia;Clostridiales;Clostridiales_Incertae_Sedis XI;Finegoldia           | 1    |
| OTU_637 | Bacteria;Synergistetes;Synergistia;Synergistales;Synergistaceae;Cloacibacillus                    | 1    |
| OTU_638 | Bacteria;Firmicutes;Clostridia;Clostridiales;Ruminococcaceae;Hydrogenoanaerobacterium             | 0.68 |
| OTU_639 | Bacteria                                                                                          | 1    |
| OTU_640 | Bacteria;Firmicutes;Bacilli;Lactobacillales;Streptococcaceae;Lactococcus                          | 1    |
| OTU_641 | Bacteria;Verrucomicrobia;Opitutae;Puniceococcales;Puniceococcaceae;Cerasicoccus                   | 0.57 |
| OTU_642 | Bacteria;Firmicutes;Clostridia;Clostridiales;Eubacteriaceae;Eubacterium                           | 0.81 |
| OTU_643 | Bacteria;Proteobacteria;Epsilonproteobacteria;Campylobacteriales;Campylobacteraceae;Campylobacter | 1    |
| OTU_644 | Bacteria;Firmicutes;Clostridia;Clostridiales;Ruminococcaceae;Acetivibrio                          | 0.58 |
| OTU_645 | Bacteria;Bacteroidetes;Bacteroidia;Bacteroidales;Porphyromonadaceae;Barnesiella                   | 0.83 |
| OTU_646 | Bacteria;Firmicutes                                                                               | 0.77 |
| OTU_647 | Bacteria;Firmicutes;Clostridia;Clostridiales                                                      | 1    |
| OTU_648 | Bacteria;Firmicutes;Clostridia;Clostridiales;Ruminococcaceae;Sporobacter                          | 0.61 |
| OTU_649 | Bacteria;Firmicutes;Clostridia;Clostridiales;Ruminococcaceae                                      | 0.98 |
| OTU_650 | Bacteria                                                                                          | 0.99 |
| OTU_651 | Bacteria;Firmicutes;Clostridia;Clostridiales;Ruminococcaceae                                      | 0.93 |
| OTU_652 | Bacteria;Actinobacteria;Actinobacteria;Coriobacteriales;Coriobacteriaceae;Coriobacterium          | 0.65 |
| OTU_653 | Bacteria;Bacteroidetes;Bacteroidia;Bacteroidales;Prevotellaceae;Prevotella                        | 0.55 |
| OTU_654 | Bacteria;Firmicutes;Clostridia;Clostridiales;Clostridiales_Incertae_Sedis XI;Peptoniphilus        | 1    |
| OTU_655 | Bacteria;Firmicutes;Clostridia;Clostridiales                                                      | 0.97 |
| OTU_656 | Bacteria;Firmicutes;Clostridia;Clostridiales;Lachnospiraceae;Oribacterium                         | 0.81 |
| OTU_657 | Bacteria;Firmicutes;Clostridia;Clostridiales;Ruminococcaceae                                      | 0.94 |
| OTU_658 | Bacteria;Actinobacteria;Actinobacteria;Coriobacteriales;Coriobacteriaceae;Olsenella               | 1    |
| OTU_659 | Bacteria;Proteobacteria;Gammaproteobacteria;Xanthomonadales;Xanthomonadaceae;Lysobacter           | 0.69 |
| OTU_660 | Bacteria;Firmicutes;Clostridia;Clostridiales                                                      | 0.9  |
| OTU_661 | Bacteria;Bacteroidetes;Bacteroidia;Bacteroidales;Porphyromonadaceae;Porphyromonas                 | 1    |
| OTU_662 | Bacteria;Actinobacteria;Actinobacteria;Actinomycetales;Corynebacteriaceae;Corynebacterium         | 1    |

|         |                                                                                                        |      |
|---------|--------------------------------------------------------------------------------------------------------|------|
| OTU_663 | Bacteria;Firmicutes;Clostridia;Clostridiales;Ruminococcaceae                                           | 0.7  |
| OTU_664 | Bacteria;Proteobacteria;Alphaproteobacteria;Caulobacterales;Caulobacteraceae;Brevundimonas             | 1    |
| OTU_665 | Bacteria;Actinobacteria;Actinobacteria;Coriobacteriales;Coriobacteriaceae                              | 1    |
| OTU_666 | Bacteria;Bacteroidetes;Bacteroidia;Bacteroidales;Prevotellaceae;Prevotella                             | 1    |
| OTU_667 | Bacteria;Proteobacteria;Alphaproteobacteria;Rhodospirillales;Rhodospirillaceae                         | 0.6  |
| OTU_668 | Bacteria;Proteobacteria;Alphaproteobacteria;Rhizobiales;Bradyrhizobiaceae                              | 0.54 |
| OTU_669 | Bacteria;Firmicutes;Clostridia;Clostridiales;Ruminococcaceae;Clostridium IV                            | 0.91 |
| OTU_670 | Bacteria;Firmicutes;Clostridia;Clostridiales;Ruminococcaceae                                           | 0.82 |
| OTU_671 | Bacteria;Firmicutes;Bacilli;Bacillales;Staphylococcaceae;Staphylococcus                                | 1    |
| OTU_672 | Bacteria;Firmicutes;Clostridia;Clostridiales;Lachnospiraceae                                           | 0.99 |
| OTU_673 | Bacteria;Firmicutes;Clostridia;Clostridiales;Ruminococcaceae;Saccharofermentans                        | 0.54 |
| OTU_674 | Bacteria;Firmicutes;Clostridia;Clostridiales;Ruminococcaceae;Clostridium IV                            | 0.99 |
| OTU_675 | Bacteria;Firmicutes;Clostridia;Clostridiales;Ruminococcaceae;Pseudoflavonifractor                      | 0.85 |
| OTU_676 | Bacteria;Bacteroidetes                                                                                 | 1    |
| OTU_677 | Bacteria;Proteobacteria;Epsilonproteobacteria;Campylobacterales;Campylobacteraceae;Campylobacter       | 1    |
| OTU_678 | Bacteria;Firmicutes;Clostridia;Clostridiales                                                           | 0.94 |
| OTU_679 | Bacteria;Firmicutes;Clostridia;Clostridiales                                                           | 0.67 |
| OTU_680 | Bacteria;Firmicutes;Clostridia;Clostridiales;Ruminococcaceae;Ruminococcus                              | 1    |
| OTU_681 | Bacteria;Fusobacteria;Fusobacteria;Fusobacteriales;Fusobacteriaceae;Fusobacterium                      | 1    |
| OTU_682 | Bacteria;Proteobacteria;Gammaproteobacteria;Pseudomonadales;Moraxellaceae;Enhydrobacter                | 1    |
| OTU_683 | Bacteria;Firmicutes;Negativicutes;Selenomonadales;Veillonellaceae;Selenomonas                          | 1    |
| OTU_684 | Bacteria;Firmicutes;Negativicutes;Selenomonadales;Veillonellaceae;Mitsuokella                          | 1    |
| OTU_685 | Bacteria;Firmicutes;Clostridia;Clostridiales;Ruminococcaceae                                           | 1    |
| OTU_686 | Bacteria;Firmicutes;Clostridia;Clostridiales                                                           | 0.95 |
| OTU_687 | Bacteria;Firmicutes;Clostridia;Clostridiales;Lachnospiraceae;Howardella                                | 0.98 |
| OTU_688 | Bacteria;Firmicutes;Clostridia;Clostridiales;Ruminococcaceae;Hydrogenoanaerobacterium                  | 0.64 |
| OTU_689 | Bacteria;Firmicutes;Clostridia;Clostridiales;Ruminococcaceae;Ruminococcus                              | 0.51 |
| OTU_690 | Bacteria;Bacteroidetes;Bacteroidia;Bacteroidales;Bacteroidaceae;Bacteroides                            | 1    |
| OTU_691 | Bacteria;Proteobacteria;Gammaproteobacteria;Pasteurellales;Pasteurellaceae;Haemophilus                 | 0.99 |
| OTU_692 | Bacteria;Actinobacteria;Actinobacteria;Bifidobacteriales;Bifidobacteriaceae;Alloscardovia              | 1    |
| OTU_693 | Bacteria;Proteobacteria;Epsilonproteobacteria;Campylobacterales;Helicobacteraceae;Helicobacter         | 1    |
| OTU_694 | Bacteria;Firmicutes;Clostridia;Clostridiales                                                           | 0.79 |
| OTU_695 | Bacteria;Bacteroidetes;Bacteroidia;Bacteroidales;Prevotellaceae;Prevotella                             | 1    |
| OTU_696 | Bacteria;Firmicutes;Erysipelotrichia;Erysipelotrichales;Erysipelotrichaceae;Erysipelotrichaceae_incert | 1    |
| OTU_697 | Bacteria;Firmicutes;Clostridia;Clostridiales                                                           | 0.96 |
| OTU_698 | Bacteria;Actinobacteria;Actinobacteria;Coriobacteriales;Coriobacteriaceae;Slackia                      | 1    |
| OTU_699 | Bacteria;Bacteroidetes;Bacteroidia;Bacteroidales;Prevotellaceae;Prevotella                             | 1    |
| OTU_700 | Bacteria;Firmicutes;Clostridia;Clostridiales;Ruminococcaceae;Acetivibrio                               | 0.72 |
| OTU_701 | Bacteria;Bacteroidetes;Bacteroidia;Bacteroidales;Prevotellaceae;Prevotella                             | 1    |
| OTU_702 | Bacteria;Bacteroidetes;Bacteroidia;Bacteroidales;Prevotellaceae;Prevotella                             | 0.75 |
| OTU_703 | Bacteria;Verrucomicrobia;Opitutae;Puniceicoccales;Puniceicoccaceae;Coralimargarita                     | 0.72 |
| OTU_704 | Bacteria;Firmicutes;Clostridia;Clostridiales                                                           | 0.68 |
| OTU_705 | Bacteria;Firmicutes;Clostridia;Clostridiales;Clostridiales_Incertae Sedis XI;Peptoniphilus             | 0.88 |
| OTU_706 | Bacteria;Firmicutes;Clostridia;Clostridiales;Ruminococcaceae                                           | 0.98 |
| OTU_707 | Bacteria                                                                                               | 0.94 |
| OTU_708 | Bacteria;Firmicutes;Clostridia;Clostridiales;Peptostreptococcaceae;Peptostreptococcus                  | 1    |
| OTU_709 | Bacteria;Firmicutes;Clostridia;Clostridiales                                                           | 0.82 |
| OTU_710 | Bacteria;Firmicutes;Clostridia;Clostridiales;Ruminococcaceae                                           | 0.54 |
| OTU_711 | Unclassified                                                                                           |      |
| OTU_712 | Bacteria;Proteobacteria;Alphaproteobacteria;Rhizobiales;Brucellaceae;Brucella                          | 0.95 |
| OTU_713 | Bacteria;Firmicutes;Clostridia;Clostridiales;Eubacteriaceae;Eubacterium                                | 0.61 |

|         |                                                                                                        |      |
|---------|--------------------------------------------------------------------------------------------------------|------|
| OTU_714 | Bacteria;Firmicutes;Negativicutes;Selenomonadales;Veillonellaceae;Centipeda                            | 0.62 |
| OTU_715 | Bacteria;Proteobacteria;Deltaproteobacteria;Desulfovibrionales;Desulfovibrionaceae;Desulfovibrio       | 0.96 |
| OTU_716 | Bacteria;Firmicutes;Clostridia;Clostridiales                                                           | 0.99 |
| OTU_717 | Bacteria;Bacteroidetes;Bacteroidia;Bacteroidales;Prevotellaceae                                        | 0.79 |
| OTU_718 | Bacteria;Firmicutes;Clostridia;Clostridiales                                                           | 0.62 |
| OTU_719 | Bacteria;Firmicutes;Erysipelotrichia;Erysipelotrichales;Erysipelotrichaceae;Erysipelotrichaceae_incert | 0.96 |
| OTU_720 | Bacteria;Firmicutes;Clostridia;Clostridiales;Lachnospiraceae;Shuttleworthia                            | 1    |
| OTU_721 | Bacteria;Firmicutes;Clostridia;Clostridiales;Lachnospiraceae;Clostridium XIVa                          | 0.78 |
| OTU_722 | Bacteria;Proteobacteria;Alphaproteobacteria;Rhizobiales;Bradyrhizobiaceae;Bradyrhizobium               | 1    |
| OTU_723 | Bacteria;Firmicutes;Clostridia;Clostridiales;Peptococcaceae 1;Peptococcus                              | 1    |
| OTU_724 | Bacteria;Firmicutes;Clostridia;Clostridiales;Lachnospiraceae                                           | 0.76 |
| OTU_725 | Bacteria;Firmicutes;Negativicutes;Selenomonadales;Veillonellaceae;Anaerovibrio                         | 0.52 |
| OTU_726 | Bacteria;Firmicutes;Erysipelotrichia;Erysipelotrichales;Erysipelotrichaceae;Allobaculum                | 0.54 |
| OTU_727 | Bacteria;Firmicutes;Erysipelotrichia;Erysipelotrichales;Erysipelotrichaceae;Erysipelotrichaceae_incert | 1    |
| OTU_728 | Bacteria                                                                                               | 1    |
| OTU_729 | Bacteria;Firmicutes;Clostridia;Clostridiales;Ruminococcaceae;Clostridium III                           | 0.57 |
| OTU_730 | Bacteria                                                                                               | 1    |
| OTU_731 | Bacteria;Proteobacteria;Gammaproteobacteria;Pseudomonadales;Pseudomonadaceae;Pseudomonas               | 1    |
| OTU_732 | Bacteria                                                                                               | 0.99 |
| OTU_733 | Bacteria;Firmicutes;Clostridia;Clostridiales;Ruminococcaceae;Hydrogenoanaerobacterium                  | 1    |
| OTU_734 | Bacteria;Firmicutes;Clostridia;Clostridiales;Eubacteriaceae;Eubacterium                                | 0.73 |
| OTU_735 | Bacteria                                                                                               | 1    |
| OTU_736 | Bacteria;Bacteroidetes;Bacteroidia;Bacteroidales;Prevotellaceae;Prevotella                             | 0.91 |
| OTU_737 | Bacteria;Bacteroidetes;Sphingobacteria;Sphingobacteriales                                              | 0.52 |
| OTU_738 | Bacteria;Bacteroidetes;Bacteroidia;Bacteroidales;Porphyromonadaceae;Barnesiella                        | 0.59 |
| OTU_739 | Bacteria;Firmicutes;Clostridia;Clostridiales;Ruminococcaceae                                           | 0.92 |
| OTU_740 | Bacteria;TM7;TM7_genera_incertae_sedis;TM7_genera_incertae_sedis;TM7_genera_incertae_sedis;I           | 1    |
| OTU_741 | Bacteria;Firmicutes;Clostridia;Clostridiales                                                           | 0.56 |
| OTU_742 | Bacteria;Firmicutes;Clostridia;Clostridiales;Lachnospiraceae;Lachnospiracea_incertae_sedis             | 0.62 |
| OTU_743 | Bacteria;Firmicutes;Clostridia;Clostridiales;Ruminococcaceae;Anaerotruncus                             | 0.59 |
| OTU_744 | Bacteria;Firmicutes;Clostridia;Clostridiales;Ruminococcaceae;Sporobacter                               | 0.57 |
| OTU_745 | Bacteria;Proteobacteria;Gammaproteobacteria;Pseudomonadales;Moraxellaceae;Acinetobacter                | 1    |
| OTU_746 | Bacteria;Bacteroidetes;Bacteroidia;Bacteroidales;Porphyromonadaceae;Barnesiella                        | 0.72 |
| OTU_747 | Bacteria;Firmicutes;Clostridia;Clostridiales;Lachnospiraceae;Clostridium XIVb                          | 0.97 |
| OTU_748 | Bacteria;Firmicutes;Negativicutes;Selenomonadales;Veillonellaceae;Megamonas                            | 1    |
| OTU_749 | Bacteria;Actinobacteria;Actinobacteria;Bifidobacteriales;Bifidobacteriaceae;Bifidobacterium            | 1    |
| OTU_750 | Bacteria;Bacteroidetes;Bacteroidia;Bacteroidales;Porphyromonadaceae;Parabacteroides                    | 1    |
| OTU_751 | Bacteria;Firmicutes;Clostridia;Clostridiales;Ruminococcaceae;Clostridium IV                            | 0.99 |
| OTU_752 | Bacteria;Firmicutes;Clostridia;Clostridiales;Ruminococcaceae;Oscillibacter                             | 0.61 |
| OTU_753 | Bacteria;Firmicutes;Erysipelotrichia;Erysipelotrichales;Erysipelotrichaceae;Clostridium XVIII          | 0.96 |
| OTU_754 | Bacteria;Actinobacteria;Actinobacteria;Actinomycetales;Actinomycetaceae;Actinomyces                    | 1    |
| OTU_755 | Bacteria;Firmicutes;Clostridia;Clostridiales;Ruminococcaceae;Sporobacter                               | 0.7  |
| OTU_756 | Bacteria;Bacteroidetes;Bacteroidia;Bacteroidales;Porphyromonadaceae;Odoribacter                        | 1    |
| OTU_757 | Bacteria                                                                                               | 1    |
| OTU_758 | Bacteria;Firmicutes;Clostridia;Clostridiales;Eubacteriaceae;Eubacterium                                | 0.77 |
| OTU_759 | Bacteria                                                                                               | 0.85 |
| OTU_760 | Bacteria;Bacteroidetes;Bacteroidia;Bacteroidales;Bacteroidaceae;Bacteroides                            | 0.65 |
| OTU_761 | Bacteria;Proteobacteria;Gammaproteobacteria;Pseudomonadales;Pseudomonadaceae;Pseudomonas               | 1    |
| OTU_762 | Bacteria;Firmicutes;Negativicutes;Selenomonadales;Veillonellaceae;Dialister                            | 1    |
| OTU_763 | Bacteria;Firmicutes;Clostridia;Clostridiales;Ruminococcaceae;Acetanaerobacterium                       | 0.68 |
| OTU_764 | Bacteria;Firmicutes;Clostridia;Clostridiales;Ruminococcaceae                                           | 0.86 |

|         |                                                                                                        |      |
|---------|--------------------------------------------------------------------------------------------------------|------|
| OTU_765 | Bacteria;Proteobacteria;Alphaproteobacteria;Sphingomonadales;Sphingomonadaceae;Sphingomonas            | 0.6  |
| OTU_766 | Bacteria;Firmicutes;Clostridia;Clostridiales                                                           | 0.87 |
| OTU_767 | Bacteria;Proteobacteria;Alphaproteobacteria;Caulobacterales;Caulobacteraceae;Brevundimonas             | 1    |
| OTU_768 | Bacteria;Firmicutes;Clostridia;Clostridiales;Lachnospiraceae                                           | 0.6  |
| OTU_769 | Bacteria;Actinobacteria;Actinobacteria;Coriobacteriales;Coriobacteriaceae;Paraeggerthella              | 1    |
| OTU_770 | Bacteria;Firmicutes;Clostridia;Clostridiales;Lachnospiraceae;Clostridium XIVb                          | 1    |
| OTU_771 | Bacteria;Bacteroidetes;Bacteroidia;Bacteroidales;Prevotellaceae;Prevotella                             | 1    |
| OTU_772 | Bacteria;Firmicutes;Clostridia;Clostridiales;Clostridiales_Incertae Sedis XIII;Mogibacterium           | 0.98 |
| OTU_773 | Bacteria;Firmicutes;Clostridia;Clostridiales                                                           | 0.98 |
| OTU_774 | Bacteria;Firmicutes;Clostridia;Clostridiales                                                           | 0.82 |
| OTU_775 | Bacteria;Firmicutes;Clostridia;Clostridiales                                                           | 0.98 |
| OTU_776 | Bacteria;Firmicutes;Clostridia;Clostridiales;Lachnospiraceae;Lachnospiraceae_incertae_sedis            | 0.95 |
| OTU_777 | Bacteria;Deinococcus-Thermus;Deinococci;Thermales;Thermaceae;Thermus                                   | 1    |
| OTU_778 | Bacteria;Lentisphaerae;Lentisphaeria;Victivallales;Victivallaceae;Victivallis                          | 1    |
| OTU_779 | Bacteria;Firmicutes;Clostridia;Clostridiales;Lachnospiraceae;Clostridium XIVa                          | 0.51 |
| OTU_780 | Bacteria;Firmicutes;Clostridia;Clostridiales;Ruminococcaceae;Clostridium IV                            | 0.92 |
| OTU_781 | Bacteria;Firmicutes;Clostridia;Clostridiales                                                           | 0.77 |
| OTU_782 | Bacteria;Firmicutes;Clostridia;Clostridiales;Ruminococcaceae                                           | 0.79 |
| OTU_783 | Bacteria;Firmicutes;Clostridia;Clostridiales;Ruminococcaceae;Oscillibacter                             | 0.99 |
| OTU_784 | Bacteria;Firmicutes;Clostridia;Clostridiales;Lachnospiraceae                                           | 1    |
| OTU_785 | Bacteria;Firmicutes;Clostridia;Clostridiales;Ruminococcaceae                                           | 1    |
| OTU_786 | Bacteria;Firmicutes;Clostridia;Clostridiales;Lachnospiraceae                                           | 0.99 |
| OTU_787 | Bacteria;Firmicutes;Clostridia;Clostridiales                                                           | 0.75 |
| OTU_788 | Bacteria;Bacteroidetes;Bacteroidia;Bacteroidales;Porphyromonadaceae;Barnesiella                        | 0.78 |
| OTU_789 | Bacteria;Firmicutes;Clostridia;Clostridiales;Ruminococcaceae;Anaerotruncus                             | 0.85 |
| OTU_790 | Bacteria;Firmicutes;Clostridia;Clostridiales;Lachnospiraceae;Lachnospiraceae_incertae_sedis            | 0.76 |
| OTU_791 | Bacteria;Fusobacteria;Fusobacteria;Fusobacteriales;Leptotrichiaceae;Sneathia                           | 0.97 |
| OTU_792 | Bacteria;Proteobacteria;Gammaproteobacteria;Enterobacteriales;Enterobacteriaceae;Serratia              | 0.91 |
| OTU_793 | Bacteria;Proteobacteria;Gammaproteobacteria;Aeromonadales;Succinivibrionaceae;Succinatimonas           | 1    |
| OTU_794 | Bacteria;Firmicutes;Clostridia;Clostridiales;Lachnospiraceae;Clostridium XIVa                          | 0.81 |
| OTU_795 | Bacteria;Firmicutes;Negativicutes;Selenomonadales;Veillonellaceae;Megasphaera                          | 1    |
| OTU_796 | Bacteria;Bacteroidetes;Bacteroidia;Bacteroidales;Bacteroidaceae;Bacteroides                            | 1    |
| OTU_797 | Bacteria;Bacteroidetes                                                                                 | 1    |
| OTU_798 | Bacteria;Firmicutes;Clostridia;Clostridiales;Lachnospiraceae                                           | 0.58 |
| OTU_799 | Bacteria;Firmicutes;Erysipelotrichia;Erysipelotrichales;Erysipelotrichaceae;Erysipelotrichaceae_incert | 1    |
| OTU_800 | Bacteria;Proteobacteria;Gammaproteobacteria;Enterobacteriales;Enterobacteriaceae;Morganella            | 1    |
| OTU_801 | Bacteria;Firmicutes;Clostridia;Clostridiales;Ruminococcaceae                                           | 0.98 |
| OTU_802 | Bacteria;Firmicutes;Clostridia;Clostridiales;Ruminococcaceae;Oscillibacter                             | 0.52 |
| OTU_803 | Bacteria;Firmicutes                                                                                    | 0.93 |
| OTU_804 | Bacteria;Bacteroidetes;Bacteroidia;Bacteroidales;Prevotellaceae;Paraprevotella                         | 1    |
| OTU_805 | Bacteria;Firmicutes;Clostridia;Clostridiales;Lachnospiraceae                                           | 1    |
| OTU_806 | Bacteria;Firmicutes;Clostridia;Clostridiales                                                           | 0.74 |
| OTU_807 | Bacteria;Firmicutes;Bacilli;Lactobacillales;Lactobacillaceae;Lactobacillus                             | 1    |
| OTU_808 | Bacteria;Proteobacteria;Gammaproteobacteria;Vibrionales;Vibrionaceae;Vibrio                            | 0.98 |
| OTU_809 | Bacteria;Actinobacteria;Actinobacteria;Coriobacteriales;Coriobacteriaceae                              | 0.79 |
| OTU_810 | Bacteria                                                                                               | 1    |
| OTU_811 | Bacteria;Synergistetes;Synergistia;Synergistales;Synergistaceae;Pyramidobacter                         | 1    |
| OTU_812 | Bacteria;Bacteroidetes;Bacteroidia;Bacteroidales;Prevotellaceae;Prevotella                             | 1    |
| OTU_813 | Bacteria;Bacteroidetes;Bacteroidia;Bacteroidales;Porphyromonadaceae;Butyricimonas                      | 0.99 |
| OTU_814 | Bacteria                                                                                               | 1    |
| OTU_815 | Bacteria;Bacteroidetes;Bacteroidia;Bacteroidales;Porphyromonadaceae;Barnesiella                        | 0.81 |

|         |                                                                                                        |      |
|---------|--------------------------------------------------------------------------------------------------------|------|
| OTU_816 | Bacteria;Firmicutes                                                                                    | 0.86 |
| OTU_817 | Bacteria                                                                                               | 1    |
| OTU_818 | Bacteria;Actinobacteria;Actinobacteria;Actinomycetales;Micrococcaceae;Rothia                           | 1    |
| OTU_819 | Bacteria;Firmicutes;Erysipelotrichia;Erysipelotrichales;Erysipelotrichaceae;Erysipelotrichaceae_incert | 1    |
| OTU_820 | Bacteria;Firmicutes;Clostridia;Clostridiales                                                           | 0.6  |
| OTU_821 | Bacteria;Proteobacteria;Deltaproteobacteria;Desulfovibrionales;Desulfovibrionaceae                     | 0.79 |
| OTU_822 | Bacteria;Firmicutes;Clostridia                                                                         | 0.67 |
| OTU_823 | Bacteria;Cyanobacteria/Chloroplast;Chloroplast;Chloroplast;Chloroplast;Streptophyta                    | 1    |
| OTU_824 | Bacteria;Firmicutes;Clostridia;Clostridiales;Ruminococcaceae                                           | 0.57 |
| OTU_825 | Bacteria;Firmicutes;Clostridia;Clostridiales;Lachnospiraceae;Lachnospiracea_incertae_sedis             | 0.78 |
| OTU_826 | Bacteria;Firmicutes;Clostridia;Clostridiales;Lachnospiraceae;Lachnospiracea_incertae_sedis             | 0.94 |
| OTU_827 | Bacteria;Firmicutes;Negativicutes;Selenomonadales;Veillonellaceae;Dialister                            | 0.99 |
| OTU_828 | Bacteria;Firmicutes;Erysipelotrichia;Erysipelotrichales;Erysipelotrichaceae;Erysipelotrichaceae_incert | 1    |
| OTU_829 | Bacteria;Firmicutes;Clostridia;Clostridiales;Ruminococcaceae                                           | 0.55 |
| OTU_830 | Bacteria;Firmicutes;Clostridia;Clostridiales                                                           | 0.92 |
| OTU_831 | Bacteria;Firmicutes                                                                                    | 0.73 |
| OTU_832 | Bacteria                                                                                               | 0.9  |
| OTU_833 | Bacteria;Firmicutes;Clostridia;Clostridiales;Ruminococcaceae;Clostridium IV                            | 0.89 |
| OTU_834 | Bacteria;Firmicutes;Clostridia;Clostridiales;Ruminococcaceae;Pseudoflavonifractor                      | 0.84 |
| OTU_835 | Bacteria;Bacteroidetes;Bacteroidia;Bacteroidales;Bacteroidaceae;Bacteroides                            | 0.99 |
| OTU_836 | Bacteria;Firmicutes;Clostridia;Clostridiales;Ruminococcaceae                                           | 0.88 |
| OTU_837 | Bacteria;Firmicutes;Clostridia;Clostridiales;Ruminococcaceae;Clostridium IV                            | 1    |
| OTU_838 | Bacteria;Proteobacteria;Betaproteobacteria;Burkholderiales;Burkholderiales_incertae_sedis;Aquabacte    | 1    |
| OTU_839 | Bacteria                                                                                               | 1    |
| OTU_840 | Bacteria;Firmicutes;Clostridia;Clostridiales;Clostridiales_Incertae Sedis XI;Peptoniphilus             | 1    |
| OTU_841 | Bacteria;Firmicutes;Clostridia                                                                         | 0.67 |
| OTU_842 | Bacteria                                                                                               | 0.93 |
| OTU_843 | Bacteria;Bacteroidetes;Bacteroidia;Bacteroidales;Prevotellaceae;Prevotella                             | 0.98 |
| OTU_844 | Bacteria;Synergistetes;Synergistia;Synergistales;Synergistaceae;Aminobacterium                         | 1    |
| OTU_845 | Bacteria;Bacteroidetes;Bacteroidia;Bacteroidales;Porphyromonadaceae;Porphyromonas                      | 1    |
| OTU_846 | Bacteria;Firmicutes;Clostridia;Clostridiales;Ruminococcaceae                                           | 0.63 |
| OTU_847 | Bacteria;Firmicutes;Clostridia;Clostridiales;Ruminococcaceae;Flavonifractor                            | 0.53 |
| OTU_848 | Bacteria;Firmicutes;Clostridia;Clostridiales;Ruminococcaceae                                           | 0.76 |
| OTU_849 | Bacteria;Firmicutes;Clostridia;Clostridiales;Lachnospiraceae;Lachnospiracea_incertae_sedis             | 0.68 |
| OTU_850 | Bacteria;Firmicutes;Clostridia;Clostridiales;Ruminococcaceae                                           | 0.86 |
| OTU_851 | Bacteria;Firmicutes;Clostridia;Clostridiales;Eubacteriaceae;Eubacterium                                | 0.98 |
| OTU_852 | Bacteria;Bacteroidetes;Bacteroidia;Bacteroidales;Rikenellaceae;Alistipes                               | 1    |
| OTU_853 | Bacteria;Bacteroidetes;Bacteroidia;Bacteroidales;Porphyromonadaceae;Barnesiella                        | 0.78 |
| OTU_854 | Bacteria;Firmicutes;Clostridia;Clostridiales                                                           | 0.83 |
| OTU_855 | Bacteria;Firmicutes;Clostridia;Clostridiales;Ruminococcaceae                                           | 1    |
| OTU_856 | Bacteria;Proteobacteria;Alphaproteobacteria;Rhodobacterales;Rhodobacteraceae;Paracoccus                | 1    |
| OTU_857 | Bacteria;Firmicutes;Clostridia;Clostridiales                                                           | 0.9  |
| OTU_858 | Bacteria;Actinobacteria;Actinobacteria;Actinomycetales;Micrococcaceae;Micrococcus                      | 1    |
| OTU_859 | Bacteria;Proteobacteria;Gammaproteobacteria                                                            | 0.94 |
| OTU_860 | Bacteria;Firmicutes;Clostridia;Clostridiales;Ruminococcaceae;Flavonifractor                            | 0.95 |
| OTU_861 | Bacteria;Firmicutes;Bacilli;Lactobacillales;Lactobacillaceae;Lactobacillus                             | 0.97 |
| OTU_862 | Bacteria;Firmicutes;Bacilli;Lactobacillales;Leuconostocaceae;Weissella                                 | 1    |
| OTU_863 | Bacteria;Proteobacteria;Betaproteobacteria;Burkholderiales;Comamonadaceae;Diaphorobacter               | 0.68 |
| OTU_864 | Bacteria;Firmicutes;Clostridia;Clostridiales;Lachnospiraceae;Lachnospiracea_incertae_sedis             | 0.95 |
| OTU_865 | Bacteria                                                                                               | 0.94 |
| OTU_866 | Bacteria;Firmicutes;Clostridia;Clostridiales;Clostridiales_Incertae Sedis XI;Anaerococcus              | 1    |

|         |                                                                                                   |      |
|---------|---------------------------------------------------------------------------------------------------|------|
| OTU_867 | Bacteria;Bacteroidetes;Bacteroidia;Bacteroidales;Prevotellaceae;Prevotella                        | 0.6  |
| OTU_868 | Bacteria;Proteobacteria;Betaproteobacteria;Burkholderiales                                        | 0.97 |
| OTU_869 | Bacteria;Firmicutes;Clostridia;Clostridiales;Ruminococcaceae                                      | 0.81 |
| OTU_870 | Bacteria;Firmicutes;Clostridia;Clostridiales;Ruminococcaceae                                      | 0.67 |
| OTU_871 | Bacteria;Bacteroidetes;Bacteroidia;Bacteroidales;Porphyromonadaceae                               | 0.99 |
| OTU_872 | Bacteria;Firmicutes;Clostridia;Clostridiales;Ruminococcaceae;Flavonifractor                       | 0.89 |
| OTU_873 | Bacteria;Proteobacteria                                                                           | 0.57 |
| OTU_874 | Bacteria;Firmicutes;Clostridia;Clostridiales;Ruminococcaceae;Hydrogenoanaerobacterium             | 0.54 |
| OTU_875 | Bacteria;Firmicutes;Clostridia;Clostridiales                                                      | 0.95 |
| OTU_876 | Bacteria;Bacteroidetes;Bacteroidia;Bacteroidales;Porphyromonadaceae;Parabacteroides               | 0.98 |
| OTU_877 | Bacteria;Firmicutes;Clostridia;Clostridiales                                                      | 0.87 |
| OTU_878 | Bacteria;Cyanobacteria/Chloroplast;Chloroplast;Chloroplast;Chloroplast;Streptophyta               | 1    |
| OTU_879 | Bacteria;Firmicutes;Clostridia;Clostridiales;Lachnospiraceae                                      | 1    |
| OTU_880 | Bacteria;Actinobacteria;Actinobacteria;Actinomycetales;Intrasporangiaceae;Janibacter              | 0.98 |
| OTU_881 | Bacteria;Firmicutes;Clostridia;Clostridiales;Ruminococcaceae;Clostridium IV                       | 1    |
| OTU_882 | Bacteria;Firmicutes;Clostridia;Clostridiales;Ruminococcaceae;Acetivibrio                          | 0.53 |
| OTU_883 | Unclassified                                                                                      |      |
| OTU_884 | Bacteria;Firmicutes;Clostridia;Clostridiales;Lachnospiraceae;Clostridium XIVa                     | 0.54 |
| OTU_885 | Bacteria;Bacteroidetes;Bacteroidia;Bacteroidales;Porphyromonadaceae;Barnesiella                   | 0.67 |
| OTU_886 | Bacteria;Bacteroidetes;Bacteroidia;Bacteroidales;Bacteroidaceae;Bacteroides                       | 1    |
| OTU_887 | Bacteria;Bacteroidetes;Sphingobacteria;Sphingobacteriales                                         | 0.52 |
| OTU_888 | Bacteria;Firmicutes;Clostridia;Clostridiales;Ruminococcaceae;Clostridium IV                       | 0.6  |
| OTU_889 | Bacteria;Firmicutes;Clostridia;Clostridiales;Ruminococcaceae;Pseudoflavonifractor                 | 0.79 |
| OTU_890 | Bacteria                                                                                          | 0.99 |
| OTU_891 | Bacteria;Bacteroidetes;Bacteroidia;Bacteroidales;Prevotellaceae;Prevotella                        | 1    |
| OTU_892 | Bacteria;Actinobacteria;Actinobacteria;Coriobacteriales;Coriobacteriaceae                         | 0.98 |
| OTU_893 | Bacteria;Firmicutes                                                                               | 0.92 |
| OTU_894 | Bacteria;Actinobacteria;Actinobacteria;Actinomycetales;Actinomycetaceae;Actinomyces               | 1    |
| OTU_895 | Bacteria;Firmicutes;Clostridia;Clostridiales;Peptococcaceae 1;Peptococcus                         | 0.96 |
| OTU_896 | Bacteria                                                                                          | 0.93 |
| OTU_897 | Bacteria;Firmicutes;Clostridia;Clostridiales;Ruminococcaceae                                      | 1    |
| OTU_898 | Bacteria;Firmicutes;Clostridia;Clostridiales;Clostridiaceae 1;Anaerospobacter                     | 0.74 |
| OTU_899 | Bacteria;Firmicutes;Clostridia;Clostridiales;Ruminococcaceae;Oscillibacter                        | 1    |
| OTU_900 | Bacteria;Firmicutes;Clostridia;Clostridiales;Ruminococcaceae;Clostridium IV                       | 0.66 |
| OTU_901 | Bacteria;Bacteroidetes;Bacteroidia;Bacteroidales;Prevotellaceae;Prevotella                        | 0.99 |
| OTU_902 | Bacteria;Bacteroidetes;Bacteroidia;Bacteroidales;Porphyromonadaceae;Barnesiella                   | 0.95 |
| OTU_903 | Bacteria;Actinobacteria;Actinobacteria;Coriobacteriales;Coriobacteriaceae;Olsenella               | 0.88 |
| OTU_904 | Bacteria;Bacteroidetes;Bacteroidia;Bacteroidales;Porphyromonadaceae;Porphyromonas                 | 0.98 |
| OTU_905 | Bacteria;Firmicutes;Clostridia;Clostridiales;Ruminococcaceae;Clostridium IV                       | 0.91 |
| OTU_906 | Bacteria;Firmicutes;Clostridia;Clostridiales;Ruminococcaceae;Acetanaerobacterium                  | 0.56 |
| OTU_907 | Bacteria;Firmicutes;Clostridia;Clostridiales;Incertae Sedis XI;Murdochiella                       | 0.94 |
| OTU_908 | Bacteria;Proteobacteria;Deltaproteobacteria;Desulfovibrionales;Desulfovibrionaceae;Desulfovibrio  | 1    |
| OTU_909 | Bacteria;Bacteroidetes;Bacteroidia;Bacteroidales;Bacteroidaceae;Bacteroides                       | 1    |
| OTU_910 | Bacteria;Proteobacteria;Epsilonproteobacteria;Campylobacteriales;Campylobacteraceae;Campylobacter | 1    |
| OTU_911 | Bacteria;Actinobacteria;Actinobacteria;Actinomycetales;Actinomycetaceae;Actinomyces               | 1    |
| OTU_912 | Bacteria;Firmicutes;Clostridia;Clostridiales;Ruminococcaceae;Clostridium IV                       | 0.9  |
| OTU_913 | Bacteria;Firmicutes;Clostridia;Clostridiales;Ruminococcaceae                                      | 0.76 |
| OTU_914 | Bacteria;Actinobacteria;Actinobacteria;Coriobacteriales;Coriobacteriaceae;Slackia                 | 0.7  |
| OTU_915 | Bacteria;Firmicutes;Clostridia;Clostridiales                                                      | 0.87 |
| OTU_916 | Bacteria;Proteobacteria;Betaproteobacteria;Burkholderiales;Comamonadaceae;Variovorax              | 0.99 |
| OTU_917 | Bacteria;Bacteroidetes;Bacteroidia;Bacteroidales;Rikenellaceae;Alistipes                          | 0.99 |



|         |                                                                                                  |      |
|---------|--------------------------------------------------------------------------------------------------|------|
| OTU_918 | Bacteria;Actinobacteria;Actinobacteria;Coriobacteriales;Coriobacteriaceae;Collinsella            | 0.98 |
| OTU_919 | Bacteria;Firmicutes;Erysipelotrichia;Erysipelotrichales;Erysipelotrichaceae;Clostridium XVIII    | 0.92 |
| OTU_920 | Bacteria;Firmicutes;Clostridia;Clostridiales;Lachnospiraceae;Lachnospiracea_incertae_sedis       | 0.54 |
| OTU_921 | Bacteria;Bacteroidetes;Bacteroidia;Bacteroidales;Prevotellaceae;Prevotella                       | 1    |
| OTU_922 | Bacteria;Proteobacteria;Alphaproteobacteria;Sphingomonadales;Sphingomonadaceae;Sphingobium       | 0.74 |
| OTU_923 | Bacteria;Firmicutes;Clostridia;Clostridiales                                                     | 0.54 |
| OTU_924 | Bacteria;Verrucomicrobia;Subdivision3;Subdivision3_genera_incertae_sedis;Subdivision3_genera_in  | 0.72 |
| OTU_925 | Bacteria;Firmicutes                                                                              | 0.53 |
| OTU_926 | Bacteria;Proteobacteria;Deltaproteobacteria;Desulfovibrionales;Desulfovibrionaceae;Desulfovibrio | 0.88 |
| OTU_927 | Bacteria;Firmicutes;Clostridia;Clostridiales;Ruminococcaceae                                     | 0.99 |
| OTU_928 | Bacteria;Bacteroidetes;Bacteroidia;Bacteroidales;Prevotellaceae;Prevotella                       | 0.95 |
| OTU_929 | Bacteria;Proteobacteria;Betaproteobacteria;Neisseriales;Neisseriaceae;Neisseria                  | 1    |
| OTU_930 | Bacteria;Firmicutes;Clostridia;Clostridiales;Lachnospiraceae;Clostridium XIVa                    | 0.99 |
| OTU_931 | Bacteria;Firmicutes;Clostridia;Clostridiales;Ruminococcaceae;Clostridium IV                      | 0.82 |
| OTU_932 | Bacteria;Bacteroidetes;Bacteroidia;Bacteroidales;Prevotellaceae;Prevotella                       | 1    |
| OTU_933 | Bacteria;Firmicutes;Clostridia;Clostridiales                                                     | 0.63 |
| OTU_934 | Bacteria                                                                                         | 0.97 |
| OTU_935 | Bacteria;Bacteroidetes;Bacteroidia;Bacteroidales;Porphyromonadaceae;Parabacteroides              | 1    |
| OTU_936 | Unclassified                                                                                     |      |
| OTU_937 | Bacteria;Firmicutes;Clostridia;Clostridiales                                                     | 0.76 |
| OTU_938 | Bacteria;Bacteroidetes;Bacteroidia;Bacteroidales;Prevotellaceae;Prevotella                       | 1    |
| OTU_939 | Bacteria;Bacteroidetes;Bacteroidia;Bacteroidales;Rikenellaceae;Alistipes                         | 0.89 |
| OTU_940 | Bacteria;Firmicutes;Bacilli;Lactobacillales;Streptococcaceae;Streptococcus                       | 1    |
| OTU_941 | Bacteria;Bacteroidetes;Bacteroidia;Bacteroidales;Prevotellaceae                                  | 0.98 |
| OTU_942 | Bacteria;Firmicutes;Clostridia;Clostridiales;Ruminococcaceae;Oscillibacter                       | 1    |
| OTU_943 | Bacteria;Bacteroidetes;Flavobacteria;Flavobacteriales;Flavobacteriaceae;Cloacibacterium          | 1    |
| OTU_944 | Bacteria;Firmicutes;Clostridia;Clostridiales;Ruminococcaceae;Clostridium IV                      | 0.97 |
| OTU_945 | Bacteria;Proteobacteria;Alphaproteobacteria;Rhizobiales;Methylobacteriaceae;Methylobacterium     | 1    |
| OTU_946 | Bacteria;Firmicutes;Clostridia;Clostridiales;Ruminococcaceae;Faecalibacterium                    | 0.69 |
| OTU_947 | Bacteria;Firmicutes;Clostridia;Clostridiales;Lachnospiraceae;Lachnospiracea_incertae_sedis       | 0.68 |
| OTU_948 | Bacteria;Bacteroidetes;Bacteroidia;Bacteroidales;Prevotellaceae;Prevotella                       | 1    |
| OTU_949 | Bacteria;Proteobacteria;Betaproteobacteria;Burkholderiales;Comamonadaceae;Delftia                | 0.96 |
| OTU_950 | Bacteria;Actinobacteria;Actinobacteria;Actinomycetales;Actinomycetaceae;Actinomyces              | 0.98 |
| OTU_951 | Bacteria;TM7;TM7_genera_incertae_sedis;TM7_genera_incertae_sedis;TM7_genera_incertae_sedis;T     | 1    |
| OTU_952 | Bacteria;Firmicutes;Clostridia;Clostridiales;Ruminococcaceae;Clostridium IV                      | 0.88 |
| OTU_953 | Bacteria                                                                                         | 0.89 |
| OTU_954 | Bacteria                                                                                         | 0.81 |
| OTU_955 | Bacteria;Firmicutes;Clostridia;Clostridiales;Lachnospiraceae;Acetitomaculum                      | 0.52 |
| OTU_956 | Bacteria;Firmicutes;Clostridia;Clostridiales;Ruminococcaceae                                     | 0.96 |
| OTU_957 | Bacteria;Firmicutes;Clostridia;Clostridiales;Lachnospiraceae;Lachnospiracea_incertae_sedis       | 0.92 |
| OTU_958 | Bacteria;Firmicutes;Clostridia;Clostridiales;Ruminococcaceae;Oscillibacter                       | 0.65 |
| OTU_959 | Bacteria;Actinobacteria;Actinobacteria;Bifidobacteriales;Bifidobacteriaceae;Gardnerella          | 0.99 |
| OTU_960 | Bacteria;Firmicutes;Clostridia;Clostridiales;Ruminococcaceae;Butyricoccus                        | 0.97 |
| OTU_961 | Bacteria;Bacteroidetes;Bacteroidia;Bacteroidales;Prevotellaceae                                  | 0.59 |
| OTU_962 | Bacteria;Actinobacteria;Actinobacteria;Coriobacteriales;Coriobacteriaceae                        | 1    |
| OTU_963 | Bacteria;Firmicutes;Clostridia;Clostridiales;Lachnospiraceae;Clostridium XIVb                    | 0.84 |
| OTU_964 | Bacteria;Firmicutes;Clostridia;Clostridiales;Gracilibacteraceae                                  | 0.55 |
| OTU_965 | Bacteria;Firmicutes                                                                              | 1    |
| OTU_966 | Bacteria;Bacteroidetes;Bacteroidia;Bacteroidales;Prevotellaceae;Prevotella                       | 1    |
| OTU_967 | Bacteria                                                                                         | 0.88 |
| OTU_968 | Bacteria;Bacteroidetes;Bacteroidia;Bacteroidales;Prevotellaceae;Prevotella                       | 1    |

|          |                                                                                                  |      |
|----------|--------------------------------------------------------------------------------------------------|------|
| OTU_969  | Bacteria;Bacteroidetes;Bacteroidia;Bacteroidales;Bacteroidaceae;Bacteroides                      | 1    |
| OTU_970  | Bacteria;Firmicutes;Bacilli;Lactobacillales;Streptococcaceae;Streptococcus                       | 1    |
| OTU_971  | Bacteria;Bacteroidetes;Bacteroidia;Bacteroidales;Bacteroidaceae;Bacteroides                      | 0.53 |
| OTU_972  | Bacteria;Proteobacteria;Betaproteobacteria;Burkholderiales;Sutterellaceae;Parasutterella         | 0.66 |
| OTU_973  | Bacteria;Bacteroidetes;Bacteroidia;Bacteroidales;Prevotellaceae;Prevotella                       | 1    |
| OTU_974  | Archaea;Euryarchaeota;Methanomicrobia;Methanosarcinales;Methanosarcinaceae;Methanosarcina        | 1    |
| OTU_975  | Bacteria;Proteobacteria;Deltaproteobacteria;Desulfovibrionales;Desulfovibrionaceae;Desulfovibrio | 0.89 |
| OTU_976  | Bacteria;Bacteroidetes;Bacteroidia;Bacteroidales;Prevotellaceae;Paraprevotella                   | 0.54 |
| OTU_977  | Bacteria;Bacteroidetes;Bacteroidia;Bacteroidales;Prevotellaceae;Prevotella                       | 0.94 |
| OTU_978  | Bacteria;Proteobacteria;Betaproteobacteria;Neisseriales;Neisseriaceae;Neisseria                  | 0.89 |
| OTU_979  | Bacteria;Firmicutes;Clostridia;Clostridiales;Ruminococcaceae                                     | 0.55 |
| OTU_980  | Bacteria;Bacteroidetes;Bacteroidia;Bacteroidales                                                 | 0.55 |
| OTU_981  | Bacteria;Proteobacteria;Deltaproteobacteria;Desulfovibrionales;Desulfovibrionaceae;Desulfovibrio | 1    |
| OTU_982  | Bacteria;Proteobacteria;Alphaproteobacteria;Rhizobiales;Methylobacteriaceae;Methylobacterium     | 1    |
| OTU_983  | Bacteria;Firmicutes;Clostridia;Clostridiales;Ruminococcaceae;Ruminococcus                        | 0.97 |
| OTU_984  | Bacteria;Firmicutes                                                                              | 0.56 |
| OTU_985  | Bacteria;Firmicutes;Clostridia;Clostridiales;Ruminococcaceae;Hydrogenoanaerobacterium            | 0.62 |
| OTU_986  | Bacteria;Firmicutes;Clostridia;Clostridiales;Ruminococcaceae                                     | 0.76 |
| OTU_987  | Bacteria;Bacteroidetes;Sphingobacteria;Sphingobacteriales;Sphingobacteriaceae;Sphingobacterium   | 1    |
| OTU_988  | Bacteria;Actinobacteria;Actinobacteria;Coriobacteriales;Coriobacteriaceae                        | 1    |
| OTU_989  | Bacteria                                                                                         | 0.84 |
| OTU_990  | Bacteria;Bacteroidetes;Bacteroidia;Bacteroidales;Prevotellaceae;Prevotella                       | 0.95 |
| OTU_991  | Bacteria;Firmicutes;Erysipelotrichia;Erysipelotrichales;Erysipelotrichaceae                      | 0.91 |
| OTU_992  | Bacteria;Firmicutes;Clostridia;Clostridiales;Ruminococcaceae                                     | 0.53 |
| OTU_993  | Bacteria;Firmicutes;Bacilli;Bacillales;Bacillales_Incertae Sedis XII;Exiguobacterium             | 1    |
| OTU_994  | Bacteria;Firmicutes;Negativicutes;Selenomonadales;Veillonellaceae                                | 1    |
| OTU_995  | Bacteria;Firmicutes;Clostridia;Clostridiales;Syntrophomonadaceae;Syntrophomonas                  | 0.92 |
| OTU_996  | Bacteria;Firmicutes;Clostridia;Clostridiales;Ruminococcaceae                                     | 1    |
| OTU_997  | Bacteria;Proteobacteria;Betaproteobacteria;Neisseriales;Neisseriaceae;Eikenella                  | 0.69 |
| OTU_998  | Bacteria;Bacteroidetes;Bacteroidia;Bacteroidales;Bacteroidaceae;Bacteroides                      | 1    |
| OTU_999  | Bacteria;Proteobacteria;Betaproteobacteria;Burkholderiales;Comamonadaceae;Brachymonas            | 0.65 |
| OTU_1000 | Bacteria;Bacteroidetes;Bacteroidia;Bacteroidales;Porphyromonadaceae;Parabacteroides              | 0.72 |
| OTU_1001 | Bacteria;Proteobacteria;Betaproteobacteria;Neisseriales;Neisseriaceae;Kingella                   | 1    |
| OTU_1002 | Bacteria;Firmicutes;Clostridia;Clostridiales                                                     | 0.51 |
| OTU_1003 | Bacteria;Firmicutes;Clostridia;Clostridiales                                                     | 0.87 |
| OTU_1004 | Unclassified                                                                                     |      |
| OTU_1005 | Bacteria;Firmicutes;Clostridia;Clostridiales;Incertae Sedis XI;Murdochiella                      | 1    |
| OTU_1006 | Bacteria;Bacteroidetes;Bacteroidia;Bacteroidales;Rikenellaceae;Alistipes                         | 0.82 |
| OTU_1007 | Bacteria;Proteobacteria;Gammaproteobacteria;Gammaproteobacteria_incertae_sedis                   | 0.57 |
| OTU_1008 | Bacteria;Firmicutes;Clostridia;Clostridiales;Ruminococcaceae                                     | 0.68 |
| OTU_1009 | Bacteria;Firmicutes;Negativicutes;Selenomonadales;Veillonellaceae;Negativicoccus                 | 1    |
| OTU_1010 | Bacteria;Bacteroidetes;Bacteroidia;Bacteroidales;Porphyromonadaceae;Parabacteroides              | 1    |
| OTU_1011 | Bacteria;Firmicutes;Clostridia;Clostridiales;Ruminococcaceae;Anaerofilum                         | 0.65 |
| OTU_1012 | Bacteria;Firmicutes;Clostridia;Clostridiales;Ruminococcaceae;Anaerotruncus                       | 0.71 |
| OTU_1013 | Bacteria;Firmicutes;Bacilli;Lactobacillales;Carnobacteriaceae;Atopostipes                        | 1    |
| OTU_1014 | Bacteria;Firmicutes;Erysipelotrichia;Erysipelotrichales;Erysipelotrichaceae;Clostridium XVIII    | 1    |
| OTU_1015 | Bacteria;Firmicutes;Clostridia;Clostridiales;Ruminococcaceae                                     | 0.94 |
| OTU_1016 | Bacteria;Firmicutes;Clostridia;Clostridiales;Lachnospiraceae;Lachnospiraceae_incertae_sedis      | 0.72 |
| OTU_1017 | Bacteria;Bacteroidetes;Bacteroidia;Bacteroidales;Bacteroidaceae;Bacteroides                      | 0.8  |
| OTU_1018 | Bacteria;Proteobacteria;Alphaproteobacteria;Rhizobiales;Hyphomicrobiaceae;Gemmiger               | 0.57 |
| OTU_1019 | Bacteria;Bacteroidetes;Bacteroidia;Bacteroidales;Prevotellaceae;Prevotella                       | 1    |

|          |                                                                                             |      |
|----------|---------------------------------------------------------------------------------------------|------|
| OTU_1020 | Bacteria;Bacteroidetes;Bacteroidia;Bacteroidales;Porphyromonadaceae;Parabacteroides         | 1    |
| OTU_1021 | Bacteria;Proteobacteria;Gammaproteobacteria;Legionellales;Legionellaceae;Legionella         | 1    |
| OTU_1022 | Bacteria;Firmicutes;Clostridia;Clostridiales;Ruminococcaceae                                | 0.69 |
| OTU_1023 | Bacteria;Actinobacteria;Actinobacteria;Coriobacteriales;Coriobacteriaceae;Paraeggerthella   | 0.52 |
| OTU_1024 | Bacteria;Firmicutes;Erysipelotrichia;Erysipelotrichales;Erysipelotrichaceae;Bulleidia       | 1    |
| OTU_1025 | Bacteria;Firmicutes;Clostridia;Clostridiales;Lachnospiraceae;Lachnospiracea_incertae_sedis  | 0.52 |
| OTU_1026 | Bacteria;Bacteroidetes;Bacteroidia;Bacteroidales;Porphyromonadaceae;Barnesiella             | 0.75 |
| OTU_1027 | Bacteria;Firmicutes;Clostridia;Clostridiales;Lachnospiraceae;Lachnospiracea_incertae_sedis  | 0.73 |
| OTU_1028 | Bacteria;Bacteroidetes;Bacteroidia;Bacteroidales;Porphyromonadaceae                         | 0.94 |
| OTU_1029 | Bacteria;Firmicutes;Clostridia;Clostridiales                                                | 0.96 |
| OTU_1030 | Bacteria;Firmicutes;Clostridia;Clostridiales;Ruminococcaceae                                | 0.66 |
| OTU_1031 | Bacteria;Actinobacteria;Actinobacteria;Coriobacteriales;Coriobacteriaceae;Gordonibacter     | 0.93 |
| OTU_1032 | Bacteria;Proteobacteria;Gammaproteobacteria;Enterobacteriales;Enterobacteriaceae;Klebsiella | 0.68 |
| OTU_1033 | Bacteria;Bacteroidetes;Bacteroidia;Bacteroidales;Marinilabiaceae;Anaerophaga                | 0.52 |
| OTU_1034 | Bacteria;Fusobacteria;Fusobacteria;Fusobacteriales;Leptotrichiaceae;Leptotrichia            | 1    |
| OTU_1035 | Bacteria;Firmicutes;Clostridia;Clostridiales;Ruminococcaceae                                | 1    |
| OTU_1036 | Bacteria;Firmicutes;Clostridia;Clostridiales;Ruminococcaceae                                | 0.99 |
| OTU_1037 | Bacteria;Firmicutes;Negativicutes;Selenomonadales;Veillonellaceae;Selenomonas               | 1    |
| OTU_1038 | Bacteria;Proteobacteria;Alphaproteobacteria;Sphingomonadales;Sphingomonadaceae;Sphingomonas | 1    |
| OTU_1039 | Bacteria;Firmicutes                                                                         | 0.6  |
| OTU_1040 | Bacteria;Firmicutes;Clostridia;Clostridiales;Ruminococcaceae                                | 0.88 |
| OTU_1041 | Bacteria;Firmicutes;Clostridia;Clostridiales                                                | 0.97 |
| OTU_1042 | Bacteria;Proteobacteria;Betaproteobacteria;Burkholderiales;Burkholderiaceae;Cupriavidus     | 1    |
| OTU_1043 | Bacteria;Bacteroidetes;Bacteroidia;Bacteroidales;Porphyromonadaceae;Porphyromonas           | 1    |
| OTU_1044 | Bacteria;Firmicutes;Clostridia;Clostridiales;Lachnospiraceae;Lachnospiracea_incertae_sedis  | 0.53 |
| OTU_1045 | Bacteria;Bacteroidetes;Bacteroidia;Bacteroidales;Porphyromonadaceae;Parabacteroides         | 0.96 |
| OTU_1046 | Bacteria                                                                                    | 1    |
| OTU_1047 | Bacteria;Firmicutes;Clostridia;Clostridiales;Ruminococcaceae;Clostridium IV                 | 0.54 |
| OTU_1048 | Bacteria;Firmicutes;Clostridia;Clostridiales;Lachnospiraceae;Roseburia                      | 1    |
| OTU_1049 | Bacteria;Firmicutes;Clostridia;Clostridiales                                                | 0.65 |
| OTU_1050 | Bacteria;Firmicutes                                                                         | 0.8  |
| OTU_1051 | Bacteria                                                                                    | 0.93 |
| OTU_1052 | Bacteria;Bacteroidetes;Bacteroidia;Bacteroidales;Porphyromonadaceae;Barnesiella             | 0.61 |
| OTU_1053 | Bacteria;Firmicutes;Clostridia;Clostridiales;Ruminococcaceae;Anaerofilum                    | 0.53 |
| OTU_1054 | Bacteria;Firmicutes;Clostridia;Clostridiales;Ruminococcaceae                                | 0.95 |
| OTU_1055 | Bacteria;Actinobacteria;Actinobacteria;Coriobacteriales;Coriobacteriaceae;Olsenella         | 0.64 |
| OTU_1056 | Bacteria;Firmicutes;Clostridia;Clostridiales;Ruminococcaceae                                | 0.94 |
| OTU_1057 | Bacteria;Firmicutes;Clostridia;Clostridiales;Lachnospiraceae;Lachnospiracea_incertae_sedis  | 0.51 |
| OTU_1058 | Bacteria;Firmicutes;Clostridia;Clostridiales;Ruminococcaceae;Clostridium IV                 | 0.72 |
| OTU_1059 | Bacteria;Firmicutes;Clostridia                                                              | 0.52 |
| OTU_1060 | Bacteria;Firmicutes;Clostridia;Clostridiales;Lachnospiraceae;Clostridium XIVb               | 1    |
| OTU_1061 | Bacteria;Bacteroidetes;Bacteroidia;Bacteroidales;Prevotellaceae;Prevotella                  | 1    |
| OTU_1062 | Bacteria;Firmicutes;Clostridia;Clostridiales;Lachnospiraceae                                | 0.86 |
| OTU_1063 | Bacteria;Proteobacteria;Gammaproteobacteria;Chromatiales;Chromatiaceae;Rheinheimera         | 1    |
| OTU_1064 | Bacteria;Proteobacteria;Betaproteobacteria;Neisseriales;Neisseriaceae                       | 1    |
| OTU_1065 | Bacteria;Actinobacteria;Actinobacteria;Coriobacteriales;Coriobacteriaceae;Olsenella         | 0.75 |
| OTU_1066 | Bacteria;Firmicutes;Clostridia;Clostridiales;Ruminococcaceae                                | 0.99 |
| OTU_1067 | Bacteria;Firmicutes;Clostridia;Clostridiales;Lachnospiraceae;Roseburia                      | 0.97 |
| OTU_1068 | Bacteria;Firmicutes;Clostridia;Clostridiales;Clostridiales_Incertae_Sedis XI;Tissierella    | 0.92 |
| OTU_1069 | Bacteria                                                                                    | 0.9  |
| OTU_1070 | Bacteria;Bacteroidetes;Bacteroidia;Bacteroidales;Prevotellaceae                             | 0.52 |

|          |                                                                                                     |      |
|----------|-----------------------------------------------------------------------------------------------------|------|
| OTU_1071 | Bacteria;Firmicutes;Bacilli;Lactobacillales;Lactobacillaceae;Lactobacillus                          | 1    |
| OTU_1072 | Bacteria;Firmicutes                                                                                 | 0.81 |
| OTU_1073 | Bacteria;Proteobacteria;Gammaproteobacteria;Enterobacteriales;Enterobacteriaceae;Escherichia/Shige  | 0.74 |
| OTU_1074 | Bacteria;Firmicutes;Clostridia                                                                      | 0.64 |
| OTU_1075 | Bacteria;Bacteroidetes;Bacteroidia;Bacteroidales;Porphyromonadaceae;Barnesiella                     | 0.56 |
| OTU_1076 | Bacteria;Bacteroidetes;Sphingobacteria;Sphingobacteriales;Sphingobacteriaceae;Pedobacter            | 1    |
| OTU_1077 | Bacteria;Firmicutes;Clostridia;Clostridiales;Lachnospiraceae;Moryella                               | 1    |
| OTU_1078 | Bacteria;Firmicutes;Clostridia;Clostridiales;Ruminococcaceae                                        | 1    |
| OTU_1079 | Bacteria;Firmicutes;Clostridia;Clostridiales;Ruminococcaceae;Anaerotruncus                          | 0.88 |
| OTU_1080 | Bacteria;Firmicutes;Clostridia;Clostridiales;Ruminococcaceae;Hydrogenoanaerobacterium               | 0.61 |
| OTU_1081 | Bacteria;Proteobacteria;Deltaproteobacteria;Desulfovibrionales                                      | 0.92 |
| OTU_1082 | Bacteria;Firmicutes;Clostridia;Clostridiales;Lachnospiraceae;Pseudobutyrvibrio                      | 0.65 |
| OTU_1083 | Bacteria;Firmicutes;Clostridia;Clostridiales;Lachnospiraceae;Clostridium XIVa                       | 0.67 |
| OTU_1084 | Bacteria;Firmicutes;Erysipelotrichia;Erysipelotrichales;Erysipelotrichaceae;Allobaculum             | 1    |
| OTU_1085 | Bacteria;Bacteroidetes;Bacteroidia;Bacteroidales;Porphyromonadaceae;Barnesiella                     | 0.71 |
| OTU_1086 | Bacteria;Proteobacteria;Deltaproteobacteria;Desulfovibrionales;Desulfovibrionaceae;Bilophila        | 0.99 |
| OTU_1087 | Bacteria;Firmicutes;Clostridia;Clostridiales;Lachnospiraceae                                        | 1    |
| OTU_1088 | Bacteria;Actinobacteria;Actinobacteria;Actinomycetales;Corynebacteriaceae;Corynebacterium           | 1    |
| OTU_1089 | Bacteria;Firmicutes;Clostridia;Clostridiales;Ruminococcaceae                                        | 1    |
| OTU_1090 | Bacteria;Bacteroidetes;Bacteroidia;Bacteroidales;Prevotellaceae;Prevotella                          | 1    |
| OTU_1091 | Bacteria;Firmicutes;Clostridia;Clostridiales;Ruminococcaceae                                        | 0.93 |
| OTU_1092 | Bacteria;Firmicutes;Clostridia;Clostridiales;Lachnospiraceae;Clostridium XIVb                       | 0.91 |
| OTU_1093 | Bacteria;Firmicutes;Clostridia;Clostridiales                                                        | 0.83 |
| OTU_1094 | Bacteria;Firmicutes;Clostridia;Clostridiales;Ruminococcaceae                                        | 0.93 |
| OTU_1095 | Bacteria;Actinobacteria;Actinobacteria;Actinomycetales;Cellulomonadaceae;Tropheryma                 | 1    |
| OTU_1096 | Bacteria                                                                                            | 0.81 |
| OTU_1097 | Bacteria;Bacteroidetes;Bacteroidia;Bacteroidales;Bacteroidaceae;Bacteroides                         | 1    |
| OTU_1098 | Bacteria;Actinobacteria;Actinobacteria;Coriobacteriales;Coriobacteriaceae;Enterorhabdus             | 0.84 |
| OTU_1099 | Bacteria;Firmicutes;Clostridia;Clostridiales;Lachnospiraceae;Lachnospiracea_incertae_sedis          | 0.85 |
| OTU_1100 | Bacteria;Bacteroidetes;Bacteroidia;Bacteroidales;Porphyromonadaceae;Barnesiella                     | 0.82 |
| OTU_1101 | Bacteria;Bacteroidetes;Bacteroidia;Bacteroidales                                                    | 1    |
| OTU_1102 | Bacteria;Cyanobacteria/Chloroplast;Chloroplast;Chloroplast;Chloroplast;Streptophyta                 | 0.99 |
| OTU_1103 | Bacteria;Firmicutes;Clostridia;Clostridiales;Ruminococcaceae                                        | 0.98 |
| OTU_1104 | Bacteria;Firmicutes;Clostridia;Clostridiales;Ruminococcaceae                                        | 0.97 |
| OTU_1105 | Bacteria;Firmicutes;Negativicutes;Selenomonadales;Acidaminococcaceae;Phascolarctobacterium          | 1    |
| OTU_1106 | Bacteria;Bacteroidetes                                                                              | 1    |
| OTU_1107 | Bacteria;Firmicutes;Clostridia;Clostridiales;Lachnospiraceae;Lachnospiracea_incertae_sedis          | 0.68 |
| OTU_1108 | Bacteria;Bacteroidetes;Bacteroidia;Bacteroidales;Prevotellaceae;Prevotella                          | 1    |
| OTU_1109 | Bacteria;Bacteroidetes;Bacteroidia;Bacteroidales;Rikenellaceae;Alistipes                            | 1    |
| OTU_1110 | Bacteria;Bacteroidetes;Bacteroidia;Bacteroidales;Porphyromonadaceae;Parabacteroides                 | 1    |
| OTU_1111 | Bacteria;Firmicutes;Clostridia;Clostridiales                                                        | 1    |
| OTU_1112 | Bacteria                                                                                            | 0.98 |
| OTU_1113 | Bacteria;Firmicutes;Clostridia;Clostridiales;Lachnospiraceae;Blautia                                | 0.99 |
| OTU_1114 | Bacteria;Bacteroidetes;Bacteroidia;Bacteroidales;Prevotellaceae;Prevotella                          | 1    |
| OTU_1115 | Bacteria;Proteobacteria;Alphaproteobacteria;Rhodospirillales;Acetobacteraceae;Roseomonas            | 0.88 |
| OTU_1116 | Bacteria;Bacteroidetes;Bacteroidia;Bacteroidales;Bacteroidaceae;Bacteroides                         | 0.85 |
| OTU_1117 | Bacteria;Actinobacteria;Actinobacteria;Actinomycetales;Corynebacteriaceae;Corynebacterium           | 1    |
| OTU_1118 | Bacteria;Firmicutes;Bacilli;Lactobacillales                                                         | 0.92 |
| OTU_1119 | Bacteria;Firmicutes;Clostridia;Clostridiales;Lachnospiraceae;Lachnospiracea_incertae_sedis          | 0.95 |
| OTU_1120 | Bacteria;Proteobacteria;Betaproteobacteria;Burkholderiales;Burkholderiales_incertae_sedis;Tepidimoi | 0.98 |
| OTU_1121 | Bacteria;Actinobacteria;Actinobacteria;Actinomycetales;Nocardiaceae;Rhodococcus                     | 1    |

|          |                                                                                                    |      |
|----------|----------------------------------------------------------------------------------------------------|------|
| OTU_1122 | Bacteria;Firmicutes;Clostridia;Clostridiales;Ruminococcaceae;Clostridium IV                        | 0.82 |
| OTU_1123 | Unclassified                                                                                       |      |
| OTU_1124 | Bacteria;Bacteroidetes;Bacteroidia;Bacteroidales;Prevotellaceae;Prevotella                         | 0.8  |
| OTU_1125 | Bacteria;Firmicutes;Clostridia;Clostridiales;Lachnospiraceae;Roseburia                             | 0.55 |
| OTU_1126 | Bacteria;Firmicutes;Clostridia;Clostridiales;Ruminococcaceae                                       | 0.99 |
| OTU_1127 | Bacteria;Firmicutes;Clostridia;Clostridiales;Ruminococcaceae;Faecalibacterium                      | 0.96 |
| OTU_1128 | Bacteria;Proteobacteria;Alphaproteobacteria;Rhodospirillales;Rhodospirillaceae;Desertibacter       | 0.64 |
| OTU_1129 | Bacteria;Firmicutes;Clostridia;Clostridiales;Ruminococcaceae                                       | 0.99 |
| OTU_1130 | Bacteria;Firmicutes;Bacilli;Lactobacillales;Carnobacteriaceae;Dolosigranulum                       | 1    |
| OTU_1131 | Bacteria                                                                                           | 0.98 |
| OTU_1132 | Bacteria;Bacteroidetes;Bacteroidia;Bacteroidales;Prevotellaceae;Prevotella                         | 1    |
| OTU_1133 | Bacteria;Bacteroidetes;Bacteroidia;Bacteroidales;Porphyromonadaceae;Barnesiella                    | 0.55 |
| OTU_1134 | Bacteria;Proteobacteria;Deltaproteobacteria;Desulfovibrionales;Desulfovibrionaceae;Bilophila       | 0.6  |
| OTU_1135 | Bacteria;Firmicutes;Clostridia;Clostridiales;Lachnospiraceae;Roseburia                             | 0.64 |
| OTU_1136 | Bacteria;Firmicutes;Erysipelotrichia;Erysipelotrichales;Erysipelotrichaceae;Turicibacter           | 1    |
| OTU_1137 | Bacteria;Bacteroidetes;Flavobacteria;Flavobacteriales;Flavobacteriaceae;Chryseobacterium           | 1    |
| OTU_1138 | Bacteria;Actinobacteria;Actinobacteria;Actinomycetales;Micrococcaceae;Kocuria                      | 1    |
| OTU_1139 | Bacteria;Bacteroidetes;Bacteroidia;Bacteroidales;Porphyromonadaceae                                | 0.51 |
| OTU_1140 | Bacteria;Firmicutes;Negativicutes;Selenomonadales;Veillonellaceae;Megasphaera                      | 0.97 |
| OTU_1141 | Bacteria;Proteobacteria;Gammaproteobacteria;Oceanospirillales;Halomonadaceae;Halomonas             | 0.99 |
| OTU_1142 | Bacteria;Bacteroidetes;Bacteroidia;Bacteroidales;Prevotellaceae;Prevotella                         | 1    |
| OTU_1143 | Bacteria;Bacteroidetes;Bacteroidia;Bacteroidales;Bacteroidaceae;Bacteroides                        | 1    |
| OTU_1144 | Bacteria;Firmicutes;Negativicutes;Selenomonadales;Veillonellaceae;Dialister                        | 1    |
| OTU_1145 | Bacteria;Bacteroidetes;Bacteroidia;Bacteroidales;Bacteroidaceae;Bacteroides                        | 0.98 |
| OTU_1146 | Bacteria;Firmicutes;Clostridia;Clostridiales;Ruminococcaceae                                       | 0.99 |
| OTU_1147 | Bacteria;Bacteroidetes;Bacteroidia;Bacteroidales;Porphyromonadaceae;Porphyromonas                  | 0.91 |
| OTU_1148 | Bacteria;Firmicutes;Bacilli;Bacillales;Bacillaceae 1;Bacillus                                      | 0.96 |
| OTU_1149 | Bacteria;Firmicutes;Clostridia;Clostridiales;Lachnospiraceae;Lachnospiraceae_incertae_sedis        | 0.55 |
| OTU_1150 | Bacteria;Firmicutes;Clostridia;Clostridiales;Lachnospiraceae;Clostridium XIVa                      | 0.65 |
| OTU_1151 | Bacteria;Actinobacteria;Actinobacteria;Coriobacteriales;Coriobacteriaceae;Cryptobacterium          | 1    |
| OTU_1152 | Bacteria;Proteobacteria;Gammaproteobacteria;Pasteurellales;Pasteurellaceae;Haemophilus             | 0.76 |
| OTU_1153 | Bacteria                                                                                           | 0.95 |
| OTU_1154 | Bacteria;Firmicutes;Clostridia;Clostridiales;Clostridiaceae 1;Clostridium sensu stricto            | 0.67 |
| OTU_1155 | Bacteria;Firmicutes;Clostridia;Clostridiales;Ruminococcaceae                                       | 0.98 |
| OTU_1156 | Bacteria;Firmicutes;Clostridia;Clostridiales;Ruminococcaceae                                       | 1    |
| OTU_1157 | Bacteria;Firmicutes;Clostridia;Clostridiales;Syntrophomonadaceae;Syntrophomonas                    | 0.99 |
| OTU_1158 | Bacteria;Firmicutes;Clostridia;Clostridiales;Lachnospiraceae;Clostridium XIVa                      | 0.98 |
| OTU_1159 | Bacteria;Firmicutes;Clostridia;Clostridiales;Lachnospiraceae                                       | 0.83 |
| OTU_1160 | Bacteria;Proteobacteria;Alphaproteobacteria;Alphaproteobacteria_incertae_sedis;Geminicoccus;Gemini | 0.95 |
| OTU_1161 | Bacteria;Bacteroidetes;Bacteroidia;Bacteroidales;Prevotellaceae;Prevotella                         | 0.99 |
| OTU_1162 | Bacteria;Firmicutes;Clostridia;Clostridiales;Lachnospiraceae;Butyrivibrio                          | 1    |
| OTU_1163 | Bacteria;Firmicutes;Clostridia;Clostridiales                                                       | 0.84 |
| OTU_1164 | Bacteria;Bacteroidetes;Bacteroidia;Bacteroidales;Prevotellaceae                                    | 0.75 |
| OTU_1165 | Bacteria;Bacteroidetes;Bacteroidia;Bacteroidales;Porphyromonadaceae;Barnesiella                    | 0.98 |
| OTU_1166 | Bacteria;Firmicutes;Erysipelotrichia;Erysipelotrichales;Erysipelotrichaceae                        | 0.68 |
| OTU_1167 | Bacteria;Actinobacteria;Actinobacteria;Actinomycetales;Actinomycetaceae;Mobiluncus                 | 1    |
| OTU_1168 | Bacteria                                                                                           | 0.93 |
| OTU_1169 | Bacteria                                                                                           | 0.99 |
| OTU_1170 | Bacteria;Bacteroidetes;Bacteroidia;Bacteroidales;Porphyromonadaceae;Barnesiella                    | 0.73 |
| OTU_1171 | Bacteria;Bacteroidetes;Bacteroidia;Bacteroidales;Bacteroidaceae;Bacteroides                        | 1    |
| OTU_1172 | Bacteria;Firmicutes;Negativicutes;Selenomonadales;Veillonellaceae;Megamonas                        | 1    |

|          |                                                                                                |      |
|----------|------------------------------------------------------------------------------------------------|------|
| OTU_1173 | Bacteria;Bacteroidetes;Bacteroidia;Bacteroidales;Prevotellaceae;Prevotella                     | 0.93 |
| OTU_1174 | Bacteria                                                                                       | 1    |
| OTU_1175 | Bacteria;Firmicutes;Clostridia;Clostridiales;Ruminococcaceae                                   | 0.92 |
| OTU_1176 | Bacteria;Firmicutes;Clostridia;Clostridiales                                                   | 0.58 |
| OTU_1177 | Bacteria;Firmicutes;Clostridia;Clostridiales                                                   | 0.77 |
| OTU_1178 | Bacteria;Firmicutes;Clostridia;Clostridiales;Lachnospiraceae                                   | 0.51 |
| OTU_1179 | Bacteria;Firmicutes;Bacilli;Lactobacillales;Lactobacillaceae;Pediococcus                       | 1    |
| OTU_1180 | Bacteria;Bacteroidetes;Bacteroidia;Bacteroidales;Porphyromonadaceae;Barnesiella                | 0.64 |
| OTU_1181 | Bacteria;Firmicutes;Clostridia;Clostridiales                                                   | 0.99 |
| OTU_1182 | Bacteria                                                                                       | 0.91 |
| OTU_1183 | Bacteria;Bacteroidetes;Sphingobacteria;Sphingobacteriales;Sphingobacteriaceae;Sphingobacterium | 0.93 |
| OTU_1184 | Bacteria;Fusobacteria;Fusobacteria;Fusobacteriales;Fusobacteriaceae;Fusobacterium              | 1    |
| OTU_1185 | Bacteria;Aquificae;Aquificae;Aquificales;Aquificaceae;Hydrogenobacter                          | 1    |
| OTU_1186 | Bacteria;Bacteroidetes;Bacteroidia;Bacteroidales;Porphyromonadaceae;Butyricimonas              | 1    |
| OTU_1187 | Bacteria;Firmicutes;Clostridia;Clostridiales;Ruminococcaceae                                   | 0.75 |
| OTU_1188 | Bacteria;Firmicutes;Clostridia;Clostridiales;Clostridiaceae 1;Clostridium sensu stricto        | 0.89 |
| OTU_1189 | Bacteria                                                                                       | 0.92 |
| OTU_1190 | Bacteria                                                                                       | 1    |
| OTU_1191 | Bacteria;Firmicutes;Clostridia;Clostridiales;Ruminococcaceae;Faecalibacterium                  | 1    |
| OTU_1192 | Bacteria;Bacteroidetes;Flavobacteria;Flavobacteriales;Flavobacteriaceae;Planobacterium         | 0.65 |
| OTU_1193 | Bacteria;Bacteroidetes                                                                         | 1    |
| OTU_1194 | Bacteria;Firmicutes;Bacilli;Bacillales;Bacillales_Incertae Sedis XII;Exiguobacterium           | 1    |
| OTU_1195 | Bacteria;Bacteroidetes;Bacteroidia;Bacteroidales;Prevotellaceae;Prevotella                     | 1    |
| OTU_1196 | Bacteria;Actinobacteria;Actinobacteria;Actinomycetales;Micrococcaceae;Arthrobacter             | 0.88 |
| OTU_1197 | Bacteria;Firmicutes;Bacilli;Lactobacillales;Lactobacillaceae;Lactobacillus                     | 0.96 |
| OTU_1198 | Bacteria;Bacteroidetes;Bacteroidia;Bacteroidales;Porphyromonadaceae;Barnesiella                | 0.83 |
| OTU_1199 | Bacteria;Bacteroidetes;Bacteroidia;Bacteroidales;Porphyromonadaceae                            | 1    |
| OTU_1200 | Bacteria;Bacteroidetes;Bacteroidia;Bacteroidales;Bacteroidaceae;Bacteroides                    | 1    |
| OTU_1201 | Bacteria;Bacteroidetes;Bacteroidia;Bacteroidales;Bacteroidaceae;Bacteroides                    | 1    |
| OTU_1202 | Bacteria;Actinobacteria;Actinobacteria;Actinomycetales;Actinomycetaceae;Actinomyces            | 1    |
| OTU_1203 | Bacteria;Firmicutes;Clostridia;Clostridiales;Ruminococcaceae;Saccharofermentans                | 0.8  |
| OTU_1204 | Bacteria;Firmicutes;Clostridia;Clostridiales                                                   | 0.77 |
| OTU_1205 | Bacteria;Firmicutes                                                                            | 0.95 |
| OTU_1206 | Bacteria;Firmicutes;Clostridia;Clostridiales;Eubacteriaceae;Anaerofustis                       | 1    |
| OTU_1207 | Bacteria;Firmicutes;Clostridia;Clostridiales;Ruminococcaceae;Oscillibacter                     | 0.64 |
| OTU_1208 | Bacteria;Actinobacteria;Actinobacteria;Actinomycetales;Corynebacteriaceae;Corynebacterium      | 1    |
| OTU_1209 | Bacteria;Bacteroidetes;Bacteroidia;Bacteroidales;Prevotellaceae;Prevotella                     | 0.89 |
| OTU_1210 | Bacteria;Bacteroidetes;Bacteroidia;Bacteroidales;Bacteroidaceae;Bacteroides                    | 0.91 |
| OTU_1211 | Bacteria;Firmicutes;Clostridia;Clostridiales                                                   | 0.81 |
| OTU_1212 | Bacteria;Proteobacteria;Alphaproteobacteria;Rhodobacterales;Rhodobacteraceae;Paracoccus        | 1    |
| OTU_1213 | Bacteria;Firmicutes;Clostridia;Clostridiales;Ruminococcaceae;Ruminococcus                      | 0.87 |
| OTU_1214 | Bacteria                                                                                       | 0.84 |
| OTU_1215 | Bacteria;Spirochaetes;Spirochaetes;Spirochaetales;Spirochaetaceae;Treponema                    | 1    |
| OTU_1216 | Bacteria;Bacteroidetes;Bacteroidia;Bacteroidales;Bacteroidaceae;Bacteroides                    | 1    |
| OTU_1217 | Bacteria;Bacteroidetes;Bacteroidia;Bacteroidales;Prevotellaceae;Prevotella                     | 1    |
| OTU_1218 | Bacteria;Firmicutes;Clostridia;Clostridiales;Ruminococcaceae                                   | 1    |
| OTU_1219 | Bacteria;Bacteroidetes;Bacteroidia;Bacteroidales;Porphyromonadaceae;Butyricimonas              | 1    |
| OTU_1220 | Bacteria;Firmicutes;Erysipelotrichia;Erysipelotrichales;Erysipelotrichaceae;Bulleidia          | 0.75 |
| OTU_1221 | Bacteria;Firmicutes;Clostridia;Clostridiales                                                   | 0.89 |
| OTU_1222 | Bacteria;Firmicutes;Clostridia;Clostridiales                                                   | 1    |
| OTU_1223 | Bacteria;Firmicutes;Clostridia;Clostridiales;Ruminococcaceae;Hydrogenoanaerobacterium          | 0.78 |

|          |                                                                                              |      |
|----------|----------------------------------------------------------------------------------------------|------|
| OTU_1224 | Bacteria                                                                                     | 0.96 |
| OTU_1225 | Bacteria;Firmicutes;Clostridia;Clostridiales;Lachnospiraceae                                 | 0.95 |
| OTU_1226 | Bacteria;Actinobacteria;Actinobacteria;Rubrobacterales;Rubrobacteraceae;Rubrobacter          | 1    |
| OTU_1227 | Bacteria;Firmicutes;Clostridia;Clostridiales;Lachnospiraceae;Clostridium XIVa                | 0.94 |
| OTU_1228 | Bacteria;TM7;TM7_genera_incertae_sedis;TM7_genera_incertae_sedis;TM7_genera_incertae_sedis;T | 1    |
| OTU_1229 | Bacteria;Bacteroidetes;Bacteroidia;Bacteroidales;Bacteroidaceae;Bacteroides                  | 1    |
| OTU_1230 | Bacteria                                                                                     | 0.93 |
| OTU_1231 | Bacteria;Bacteroidetes;Bacteroidia;Bacteroidales;Prevotellaceae;Prevotella                   | 0.54 |
| OTU_1232 | Bacteria;Proteobacteria;Deltaproteobacteria;Myxococcales                                     | 0.99 |
| OTU_1233 | Bacteria;Firmicutes;Clostridia;Clostridiales;Clostridiales_Incertae_Sedis_XI;Tepidimicrobium | 0.67 |
| OTU_1234 | Bacteria;Bacteroidetes;Bacteroidia;Bacteroidales;Prevotellaceae;Prevotella                   | 0.96 |
| OTU_1235 | Bacteria;Bacteroidetes;Flavobacteria;Flavobacteriales;Flavobacteriaceae;Capnocytophaga       | 1    |
| OTU_1236 | Bacteria                                                                                     | 0.9  |
| OTU_1237 | Bacteria;Proteobacteria;Betaproteobacteria;Burkholderiales;Burkholderiaceae;Limnobacter      | 1    |
| OTU_1238 | Bacteria;Firmicutes;Clostridia;Clostridiales;Ruminococcaceae                                 | 0.58 |
| OTU_1239 | Unclassified                                                                                 |      |
| OTU_1240 | Bacteria;Bacteroidetes;Bacteroidia;Bacteroidales;Prevotellaceae;Prevotella                   | 0.98 |
| OTU_1241 | Bacteria                                                                                     | 0.94 |
| OTU_1242 | Bacteria;Synergistetes;Synergistia;Synergistales;Synergistaceae;Cloacibacillus               | 0.67 |
| OTU_1243 | Bacteria;Firmicutes;Clostridia;Clostridiales;Lachnospiraceae;Dorea                           | 0.99 |
| OTU_1244 | Bacteria;Proteobacteria                                                                      | 0.58 |
| OTU_1245 | Bacteria                                                                                     | 1    |
| OTU_1246 | Bacteria;Firmicutes;Clostridia;Clostridiales;Peptococcaceae 1;Peptococcus                    | 0.99 |
| OTU_1247 | Bacteria;Firmicutes;Clostridia;Clostridiales;Lachnospiraceae                                 | 1    |
| OTU_1248 | Bacteria                                                                                     | 0.99 |
| OTU_1249 | Bacteria;Firmicutes;Clostridia;Clostridiales;Lachnospiraceae                                 | 0.74 |
| OTU_1250 | Bacteria;Firmicutes                                                                          | 0.74 |
| OTU_1251 | Bacteria;Lentisphaerae;Lentisphaeria;Victivallales;Victivallaceae;Victivallis                | 0.87 |
| OTU_1252 | Bacteria;Firmicutes;Clostridia;Clostridiales;Ruminococcaceae;Clostridium IV                  | 0.61 |
| OTU_1253 | Bacteria;Firmicutes;Clostridia;Clostridiales;Ruminococcaceae                                 | 0.77 |
| OTU_1254 | Bacteria;Firmicutes;Negativicutes;Selenomonadales;Veillonellaceae;Selenomonas                | 0.54 |
| OTU_1255 | Bacteria;Bacteroidetes;Bacteroidia;Bacteroidales;Porphyromonadaceae;Barnesiella              | 0.6  |
| OTU_1256 | Bacteria;Bacteroidetes;Bacteroidia;Bacteroidales;Porphyromonadaceae;Barnesiella              | 0.59 |
| OTU_1257 | Bacteria;Bacteroidetes;Bacteroidia;Bacteroidales;Porphyromonadaceae                          | 0.99 |
| OTU_1258 | Bacteria                                                                                     | 0.85 |
| OTU_1259 | Bacteria;Firmicutes;Clostridia;Clostridiales;Lachnospiraceae;Coprococcus                     | 0.56 |
| OTU_1260 | Bacteria;Firmicutes;Clostridia;Clostridiales;Ruminococcaceae;Oscillibacter                   | 0.82 |
| OTU_1261 | Bacteria;Fusobacteria;Fusobacteria;Fusobacteriales;Leptotrichiaceae;Leptotrichia             | 1    |
| OTU_1262 | Bacteria;Firmicutes;Clostridia;Clostridiales;Ruminococcaceae;Hydrogenoanaerobacterium        | 0.6  |
| OTU_1263 | Bacteria                                                                                     | 0.85 |
| OTU_1264 | Bacteria;Firmicutes;Clostridia;Clostridiales                                                 | 0.59 |
| OTU_1265 | Bacteria;Gemmatimonadetes;Gemmatimonadetes;Gemmatimonadales;Gemmatimonadaceae;Gemmatir       | 0.56 |
| OTU_1266 | Bacteria;Bacteroidetes;Bacteroidia;Bacteroidales;Porphyromonadaceae;Barnesiella              | 0.75 |
| OTU_1267 | Bacteria;Firmicutes;Clostridia;Clostridiales;Clostridiales_Incertae_Sedis_XIII;Mogibacterium | 0.95 |
| OTU_1268 | Bacteria;Proteobacteria;Gammaproteobacteria;Pseudomonadales;Moraxellaceae;Acinetobacter      | 1    |
| OTU_1269 | Bacteria;Bacteroidetes;Bacteroidia;Bacteroidales;Bacteroidaceae;Anaerorhabdus                | 0.57 |
| OTU_1270 | Bacteria;Firmicutes;Clostridia;Clostridiales;Ruminococcaceae;Faecalibacterium                | 0.7  |
| OTU_1271 | Bacteria;Actinobacteria;Actinobacteria;Actinomycetales;Geodermatophilaceae;Blastococcus      | 1    |
| OTU_1272 | Bacteria;Firmicutes;Negativicutes;Selenomonadales;Veillonellaceae;Megamonas                  | 0.94 |
| OTU_1273 | Bacteria                                                                                     | 0.96 |
| OTU_1274 | Bacteria;Firmicutes;Clostridia;Clostridiales;Ruminococcaceae                                 | 0.8  |

|          |                                                                                                |      |
|----------|------------------------------------------------------------------------------------------------|------|
| OTU_1275 | Bacteria;Firmicutes;Clostridia;Clostridiales;Lachnospiraceae;Coprococcus                       | 0.54 |
| OTU_1276 | Bacteria                                                                                       | 0.86 |
| OTU_1277 | Bacteria;Firmicutes;Clostridia;Clostridiales;Ruminococcaceae                                   | 0.78 |
| OTU_1278 | Bacteria;Actinobacteria;Actinobacteria;Coriobacteriales;Coriobacteriaceae                      | 1    |
| OTU_1279 | Bacteria;Firmicutes;Clostridia;Clostridiales;Ruminococcaceae                                   | 0.77 |
| OTU_1280 | Bacteria;Firmicutes;Clostridia;Clostridiales;Ruminococcaceae                                   | 0.75 |
| OTU_1281 | Bacteria;Firmicutes;Clostridia;Clostridiales;Ruminococcaceae;Oscillibacter                     | 0.51 |
| OTU_1282 | Bacteria;Bacteroidetes;Bacteroidia;Bacteroidales;Prevotellaceae;Prevotella                     | 0.69 |
| OTU_1283 | Bacteria;Proteobacteria;Deltaproteobacteria;Bdellovibrionales;Bdellovibrionaceae;Vampirovibrio | 0.78 |
| OTU_1284 | Bacteria;Bacteroidetes;Bacteroidia;Bacteroidales;Prevotellaceae;Prevotella                     | 0.89 |
| OTU_1285 | Bacteria;Proteobacteria;Deltaproteobacteria                                                    | 0.74 |
| OTU_1286 | Bacteria;Firmicutes;Clostridia;Clostridiales;Ruminococcaceae;Sporobacter                       | 0.78 |
| OTU_1287 | Bacteria;Firmicutes                                                                            | 0.86 |
| OTU_1288 | Bacteria;Bacteroidetes;Bacteroidia;Bacteroidales;Prevotellaceae;Prevotella                     | 1    |
| OTU_1289 | Bacteria;Proteobacteria;Gammaproteobacteria;Pseudomonadales;Moraxellaceae;Acinetobacter        | 1    |
| OTU_1290 | Bacteria;Firmicutes;Erysipelotrichia;Erysipelotrichales;Erysipelotrichaceae;Allobaculum        | 0.88 |
| OTU_1291 | Bacteria;Proteobacteria;Gammaproteobacteria;Alteromonadales;Shewanellaceae;Shewanella          | 1    |
| OTU_1292 | Bacteria;Fusobacteria;Fusobacteria;Fusobacteriales;Leptotrichiaceae;Leptotrichia               | 1    |
| OTU_1293 | Bacteria;Firmicutes;Bacilli;Lactobacillales;Aerococcaceae;Aerococcus                           | 1    |
| OTU_1294 | Bacteria;Firmicutes;Clostridia;Clostridiales;Ruminococcaceae;Faecalibacterium                  | 0.98 |
| OTU_1295 | Bacteria;Bacteroidetes;Bacteroidia;Bacteroidales;Bacteroidaceae;Bacteroides                    | 1    |
| OTU_1296 | Bacteria;Firmicutes;Negativicutes;Selenomonadales;Veillonellaceae;Dialister                    | 1    |



**Table S3. Fecal microbial diversity index in the discovery cohort**

| Cohort    | Sample  | Available | Shannon    | simpson    | invsimpson | obs | chao1     | ice      |
|-----------|---------|-----------|------------|------------|------------|-----|-----------|----------|
| Discovery | H_20    | 39455     | 3.56767009 | 0.94695516 | 18.8519746 | 130 | 165.63636 | 140.6667 |
| Discovery | H_N204  | 26843     | 2.94193029 | 0.90952488 | 11.0527624 | 118 | 179.25    | 131.8542 |
| Discovery | H_37    | 28671     | 2.50096143 | 0.79459224 | 4.86836532 | 114 | 142.40909 | 121.9268 |
| Discovery | H_N68   | 30098     | 3.22566498 | 0.8924345  | 9.29666098 | 174 | 222.65789 | 191.6203 |
| Discovery | H_44    | 66600     | 3.56505714 | 0.95230725 | 20.9675456 | 141 | 163.15385 | 149.3478 |
| Discovery | H_N105  | 23149     | 3.39483177 | 0.93580182 | 15.5767648 | 142 | 191.5     | 153.4286 |
| Discovery | H_34    | 31640     | 3.99789576 | 0.95719789 | 23.3633368 | 231 | 257.72727 | 245.1061 |
| Discovery | H_N39   | 32278     | 2.83596493 | 0.87355073 | 7.90830967 | 154 | 174.02381 | 162.3796 |
| Discovery | H_52    | 39632     | 3.25289492 | 0.92676225 | 13.654161  | 143 | 197       | 156.9559 |
| Discovery | H_17    | 31106     | 2.66912981 | 0.8576248  | 7.02369518 | 75  | 93.75     | 82.17391 |
| Discovery | H_N50   | 20621     | 2.84323498 | 0.90520608 | 10.5491998 | 99  | 107.90909 | 103.0314 |
| Discovery | H_73    | 66937     | 3.30775259 | 0.94380328 | 17.7946325 | 100 | 108.45    | 103.9157 |
| Discovery | H_22    | 31497     | 3.31219643 | 0.92173095 | 12.7764417 | 165 | 179.58    | 174      |
| Discovery | H_8     | 30475     | 3.33595319 | 0.932546   | 14.8249169 | 131 | 155.04545 | 138.1577 |
| Discovery | H_71    | 68619     | 3.34310973 | 0.94216432 | 17.290366  | 116 | 142.88889 | 123.5059 |
| Discovery | H_N91   | 28970     | 3.26398746 | 0.8887694  | 8.99033211 | 170 | 244.46154 | 186.5414 |
| Discovery | H_24    | 36175     | 3.59144526 | 0.93844859 | 16.2465817 | 175 | 196.125   | 182.1118 |
| Discovery | H_N76   | 24145     | 3.16775556 | 0.91208925 | 11.3751737 | 146 | 186.90909 | 155.1    |
| Discovery | H_54    | 43246     | 2.87883117 | 0.89522559 | 9.54431551 | 96  | 121       | 103.0199 |
| Discovery | H_N181  | 26388     | 2.83052132 | 0.86884507 | 7.62457057 | 129 | 159.375   | 138.0391 |
| Discovery | H_N1212 | 21852     | 3.28277946 | 0.92343564 | 13.0609064 | 136 | 175.2     | 146.2535 |
| Discovery | H_15    | 67672     | 3.78552757 | 0.95774021 | 23.6631586 | 190 | 207.30769 | 199.1011 |
| Discovery | H_46    | 68195     | 4.12630567 | 0.97099825 | 34.4806751 | 235 | 308.84091 | 256.3183 |
| Discovery | H_N132  | 30667     | 3.05222878 | 0.89342514 | 9.38307548 | 157 | 191.32143 | 166.3463 |
| Discovery | H_N260  | 24804     | 2.91894133 | 0.88574547 | 8.75238802 | 126 | 150.14286 | 134.5872 |
| Discovery | H_70    | 57602     | 3.12637943 | 0.92161309 | 12.7572325 | 129 | 165.96154 | 140.2066 |
| Discovery | H_27    | 40646     | 3.83792859 | 0.96658695 | 29.9284252 | 160 | 186.28125 | 169.0377 |
| Discovery | H_N57   | 25168     | 2.15414836 | 0.81205482 | 5.32070029 | 62  | 76.222222 | 69.38462 |
| Discovery | H_N72   | 33053     | 1.86989645 | 0.72144581 | 3.5899658  | 90  | 112.04167 | 98.30556 |
| Discovery | H_77    | 62817     | 2.20666753 | 0.78980054 | 4.7573861  | 74  | 105.5     | 83.30928 |
| Discovery | H_N197  | 26534     | 2.94235988 | 0.91518497 | 11.7903635 | 128 | 166.11765 | 141.2245 |
| Discovery | H_6     | 39675     | 4.15711123 | 0.97282794 | 36.8025093 | 225 | 252.84091 | 236.0385 |
| Discovery | H_N55   | 24669     | 3.71008455 | 0.95597721 | 22.7155048 | 198 | 249.36111 | 212.1745 |
| Discovery | H_64    | 66966     | 2.29139431 | 0.73531351 | 3.77805457 | 174 | 237.3913  | 196.7647 |
| Discovery | H_63    | 56513     | 3.64876318 | 0.93988189 | 16.6339226 | 212 | 265.77778 | 225.6143 |
| Discovery | H_53    | 68666     | 2.53603364 | 0.83154543 | 5.93631871 | 112 | 144.14286 | 124.5862 |
| Discovery | H_5     | 36721     | 3.22009185 | 0.9332672  | 14.9851342 | 99  | 109.28571 | 102.375  |
| Discovery | H_N264  | 27461     | 3.31005993 | 0.94290779 | 17.5155257 | 113 | 128.75    | 120.3443 |
| Discovery | H_N1022 | 30159     | 2.70490428 | 0.86953158 | 7.66468993 | 160 | 222.5     | 180.5455 |
| Discovery | H_76    | 59251     | 3.25568796 | 0.92632967 | 13.5739852 | 129 | 143.23529 | 137.1436 |
| Discovery | H_40    | 38630     | 2.32784043 | 0.83597582 | 6.09666222 | 74  | 110.75    | 83.25806 |
| Discovery | H_N145  | 24908     | 2.89376592 | 0.89209118 | 9.26708318 | 122 | 160.22727 | 132.4518 |
| Discovery | H_N258  | 33935     | 2.44143215 | 0.84740408 | 6.553255   | 78  | 109.5     | 86.25641 |
| Discovery | H_14    | 29789     | 2.56625543 | 0.83563276 | 6.08393749 | 153 | 208.125   | 167.6863 |
| Discovery | H_13    | 61844     | 3.86633124 | 0.96216244 | 26.4287626 | 184 | 205.12069 | 197.7072 |
| Discovery | H_55    | 66239     | 3.3167054  | 0.909432   | 11.0414279 | 168 | 231.28125 | 184.521  |
| Discovery | H_25    | 31203     | 3.65848261 | 0.93226971 | 14.7644432 | 177 | 225.89286 | 190.5472 |
| Discovery | H_N109  | 25953     | 3.08615119 | 0.90338924 | 10.3508134 | 173 | 197.5     | 184.7018 |
| Discovery | H_61    | 71081     | 2.83350238 | 0.85796501 | 7.04051877 | 169 | 223.85714 | 185.9075 |

|           |          |       |            |            |            |     |           |          |
|-----------|----------|-------|------------|------------|------------|-----|-----------|----------|
| Discovery | H_28     | 39982 | 3.29941355 | 0.9243102  | 13.2118204 | 137 | 160.05882 | 149.3636 |
| Discovery | H_N177   | 24976 | 2.6470732  | 0.83453937 | 6.04373368 | 131 | 149.38235 | 139.3678 |
| Discovery | H_9      | 30088 | 2.3619995  | 0.80496132 | 5.127188   | 54  | 56.909091 | 57.40984 |
| Discovery | H_33     | 30030 | 2.8380346  | 0.88924176 | 9.02867362 | 135 | 161       | 143.2913 |
| Discovery | H_26     | 27635 | 3.93800268 | 0.9344439  | 15.2541096 | 236 | 296.75    | 255.2656 |
| Discovery | H_N40    | 34330 | 4.26931546 | 0.9729939  | 37.0286661 | 279 | 385.96296 | 308.4728 |
| Discovery | H_N121   | 22789 | 3.43977661 | 0.93653927 | 15.7577769 | 150 | 188.28125 | 163.1818 |
| Discovery | H_23     | 38269 | 3.85974787 | 0.95835651 | 24.0133561 | 193 | 271.125   | 213.1107 |
| Discovery | H_N56    | 31417 | 1.62449468 | 0.64598707 | 2.8247556  | 89  | 114       | 95.02871 |
| Discovery | H_N164   | 24447 | 2.35333378 | 0.83882891 | 6.2045868  | 77  | 110.33333 | 86.07216 |
| Discovery | H_12     | 36065 | 2.91929904 | 0.88597032 | 8.76964681 | 136 | 162.03571 | 143.6899 |
| Discovery | H_N75    | 25749 | 4.05395948 | 0.96695977 | 30.2661309 | 231 | 291.63158 | 246.9214 |
| Discovery | H_47     | 67479 | 2.24178256 | 0.78040318 | 4.55379996 | 125 | 173.13333 | 139.7149 |
| Discovery | H_N84    | 21680 | 2.74894257 | 0.86236895 | 7.26580213 | 114 | 138.14286 | 122.7081 |
| Discovery | H_42     | 54843 | 2.62972669 | 0.82833657 | 5.82535266 | 83  | 127.1     | 92.12121 |
| Discovery | H_N9     | 33551 | 2.24625011 | 0.83722501 | 6.14344997 | 88  | 108.34615 | 97.51724 |
| Discovery | H_N52    | 24743 | 3.20392682 | 0.89665811 | 9.67661814 | 145 | 197.54545 | 156.4251 |
| Discovery | H_62     | 77508 | 3.33637441 | 0.93898275 | 16.3888091 | 158 | 190.59524 | 171      |
| Discovery | H_1      | 30213 | 2.17596489 | 0.79084432 | 4.78112766 | 86  | 110.5     | 93.72258 |
| Discovery | H_N111   | 25088 | 3.43458061 | 0.92225407 | 12.8624101 | 169 | 201.03333 | 178.6623 |
| Discovery | H_N54    | 26476 | 2.02821809 | 0.74483478 | 3.91902941 | 73  | 98        | 80.9646  |
| Discovery | H_N102   | 34215 | 2.61102697 | 0.85624372 | 6.95621784 | 146 | 226.18182 | 160.8322 |
| Discovery | H_4      | 31771 | 3.0231761  | 0.87622082 | 8.07890335 | 137 | 155.77778 | 146.4095 |
| Discovery | H_36     | 28601 | 3.01188927 | 0.91542542 | 11.8238842 | 119 | 158.0625  | 127.6735 |
| Discovery | H_16     | 32313 | 3.15088841 | 0.92374456 | 13.1138187 | 117 | 137.05556 | 122.89   |
| Discovery | H_69     | 58354 | 3.44762628 | 0.94543735 | 18.3275543 | 154 | 201.11538 | 166.8287 |
| Discovery | C_82     | 33629 | 2.48132594 | 0.82346904 | 5.66472877 | 104 | 152.05    | 116.9006 |
| Discovery | C_62     | 33973 | 3.04647199 | 0.88743721 | 8.88393013 | 155 | 193       | 169.1624 |
| Discovery | C_60     | 28086 | 3.84363746 | 0.95614773 | 22.8038368 | 185 | 221.02632 | 198.7737 |
| Discovery | C_32     | 55348 | 3.69353928 | 0.94947294 | 19.7913752 | 184 | 218.225   | 196.4121 |
| Discovery | C_HCC20: | 19446 | 2.17092229 | 0.80999572 | 5.26303944 | 68  | 98.083333 | 74.15108 |
| Discovery | C_11     | 38922 | 3.21290814 | 0.93442451 | 15.2495995 | 110 | 134.2     | 117.6629 |
| Discovery | C_75     | 32580 | 3.16667636 | 0.92766732 | 13.8250091 | 113 | 124.57143 | 118.7635 |
| Discovery | C_61     | 29320 | 2.30978475 | 0.82718866 | 5.7866574  | 131 | 191.5     | 147.6442 |
| Discovery | C_88     | 68464 | 2.40925841 | 0.7846427  | 4.64344596 | 148 | 212.65385 | 161.8408 |
| Discovery | C_18     | 29724 | 3.49579631 | 0.9487462  | 19.5107493 | 142 | 164.53333 | 150.3982 |
| Discovery | C_HCC17: | 28195 | 2.76344331 | 0.90268795 | 10.2762194 | 75  | 129       | 81.77228 |
| Discovery | C_HCC17: | 23202 | 1.61798586 | 0.71790213 | 3.54486903 | 44  | 65.125    | 51.22222 |
| Discovery | C_94     | 27501 | 2.73154026 | 0.83324623 | 5.99686584 | 163 | 225.23529 | 180.6307 |
| Discovery | C_36     | 60261 | 2.1408141  | 0.78486326 | 4.64820656 | 103 | 133.15385 | 115.7436 |
| Discovery | C_HCC22: | 26073 | 2.4020065  | 0.77198313 | 4.38564038 | 109 | 131.15385 | 117.8571 |
| Discovery | C_12     | 42792 | 2.75770366 | 0.86539757 | 7.42928632 | 115 | 133       | 119.7711 |
| Discovery | C_101    | 27199 | 2.98939362 | 0.89575718 | 9.592987   | 163 | 190.225   | 173.6552 |
| Discovery | C_86     | 75015 | 3.47306614 | 0.93122507 | 14.5401812 | 223 | 279       | 242.1931 |
| Discovery | C_106    | 23313 | 3.37306677 | 0.92038127 | 12.5598584 | 171 | 235.97059 | 189.5572 |
| Discovery | C_HCC20: | 29252 | 2.90535204 | 0.89666603 | 9.67682295 | 117 | 149.34615 | 129.0683 |
| Discovery | C_54     | 40343 | 3.18998368 | 0.91522332 | 11.795696  | 155 | 196.88462 | 165.1786 |
| Discovery | C_69     | 31301 | 2.8161942  | 0.88666713 | 8.82356571 | 99  | 127.57143 | 105.413  |
| Discovery | C_85     | 62024 | 2.73244579 | 0.83981448 | 6.24276169 | 136 | 172.125   | 148.3008 |
| Discovery | C_73     | 29475 | 3.01642407 | 0.88595977 | 8.76883499 | 133 | 146.78125 | 139.2698 |
| Discovery | C_64     | 28560 | 4.08328669 | 0.96886705 | 32.1203147 | 244 | 310.44643 | 266.0911 |

|           |          |       |            |            |            |     |           |          |
|-----------|----------|-------|------------|------------|------------|-----|-----------|----------|
| Discovery | C_HCC23: | 27516 | 2.63263744 | 0.83033147 | 5.89384505 | 98  | 150.08333 | 106.8608 |
| Discovery | C_HCC16: | 30314 | 2.74160279 | 0.88052658 | 8.37006271 | 117 | 168.2     | 130.037  |
| Discovery | C_28     | 26844 | 3.30610684 | 0.94110347 | 16.9789302 | 123 | 160.5     | 133      |
| Discovery | C_46     | 61509 | 2.70397093 | 0.85340643 | 6.82158148 | 161 | 187.27273 | 172.5836 |
| Discovery | C_HCC22: | 26973 | 2.81852217 | 0.89703847 | 9.71236585 | 125 | 168.2     | 139.0282 |
| Discovery | C_89     | 62092 | 2.11175705 | 0.82366832 | 5.67113055 | 49  | 59.285714 | 54.7931  |
| Discovery | C_14     | 62487 | 2.33818096 | 0.80346348 | 5.08811283 | 109 | 143.61538 | 121.1978 |
| Discovery | C_20     | 31402 | 3.69274991 | 0.95512668 | 22.284955  | 182 | 276.53125 | 203.25   |
| Discovery | C_90     | 62355 | 2.63062191 | 0.87487977 | 7.99231281 | 99  | 199       | 122.5088 |
| Discovery | C_HCC17: | 22789 | 3.09974296 | 0.88651678 | 8.81187554 | 130 | 141.57143 | 135.2351 |
| Discovery | C_19     | 37210 | 3.26913688 | 0.93582389 | 15.5821214 | 122 | 146.03846 | 130.3333 |
| Discovery | C_7      | 36169 | 3.25383513 | 0.92530737 | 13.3882013 | 155 | 181.13333 | 162.9772 |
| Discovery | C_HCC21: | 26876 | 3.02916705 | 0.9146779  | 11.7202927 | 119 | 149.03125 | 132.2601 |
| Discovery | C_HCC22: | 24799 | 2.33808317 | 0.86657275 | 7.49472109 | 60  | 92        | 65.80392 |
| Discovery | C_HCC16: | 29725 | 2.96922976 | 0.91003822 | 11.1158319 | 99  | 121.22222 | 105.4327 |
| Discovery | C_HCC23: | 28351 | 3.08719201 | 0.8963286  | 9.64586152 | 123 | 159.45    | 132.6528 |
| Discovery | C_102    | 36002 | 2.18521759 | 0.72656863 | 3.65722489 | 82  | 100.375   | 90.64706 |
| Discovery | C_13     | 29164 | 2.49408321 | 0.83752367 | 6.15474277 | 68  | 96.166667 | 72.85714 |
| Discovery | C_83     | 38856 | 3.00427145 | 0.91566821 | 11.8579247 | 106 | 136.15385 | 118.3121 |
| Discovery | C_74     | 31370 | 3.43925404 | 0.94787909 | 19.186156  | 131 | 167.96154 | 143.858  |
| Discovery | C_38     | 55080 | 2.41239208 | 0.84906757 | 6.62548151 | 77  | 93.055556 | 84.59574 |
| Discovery | C_109    | 26289 | 2.77349182 | 0.88436551 | 8.64793922 | 75  | 87.5      | 80.55556 |
| Discovery | C_49     | 38713 | 3.46269138 | 0.94536891 | 18.304597  | 140 | 164.03846 | 148.7004 |
| Discovery | C_47     | 42908 | 3.85303791 | 0.96512073 | 28.6703214 | 177 | 222.125   | 189.465  |
| Discovery | C_39     | 30907 | 3.49076217 | 0.92785473 | 13.8609218 | 179 | 213.13333 | 189.5    |
| Discovery | C_44     | 54317 | 2.86665232 | 0.88740969 | 8.88175929 | 158 | 187.16667 | 170.2039 |
| Discovery | C_34     | 25506 | 2.41469721 | 0.82310064 | 5.65293173 | 122 | 143.42857 | 133.5487 |
| Discovery | C_24     | 56950 | 3.52750373 | 0.94182415 | 17.1892638 | 207 | 259.15517 | 227.6065 |
| Discovery | C_10     | 74505 | 2.4732133  | 0.85530559 | 6.91111714 | 127 | 159.02941 | 140.4389 |
| Discovery | C_6      | 36428 | 2.98626485 | 0.90941661 | 11.0395516 | 135 | 165.11765 | 148.0909 |
| Discovery | C_58     | 39454 | 3.30894284 | 0.90405351 | 10.4224766 | 158 | 192.03125 | 170.543  |
| Discovery | C_53     | 36418 | 3.53424905 | 0.94329021 | 17.6336403 | 194 | 222.88    | 206.6667 |
| Discovery | C_68     | 29594 | 3.23799871 | 0.93623886 | 15.6835344 | 116 | 126.22727 | 120.35   |
| Discovery | C_23     | 31889 | 2.30350662 | 0.76927522 | 4.33416809 | 65  | 81.333333 | 70.40909 |
| Discovery | C_81     | 35172 | 3.2113062  | 0.90625807 | 10.6675853 | 212 | 252.32258 | 229.2811 |
| Discovery | C_51     | 33873 | 2.5389927  | 0.85200869 | 6.75715346 | 75  | 97.5      | 80.125   |
| Discovery | C_HCC18: | 22250 | 2.73562548 | 0.84965414 | 6.65133034 | 104 | 116.04167 | 108.8571 |
| Discovery | C_95     | 37003 | 2.39966893 | 0.80040213 | 5.01007342 | 158 | 187.45455 | 169.2438 |
| Discovery | C_HCC17: | 32155 | 1.95367078 | 0.70938971 | 3.44103443 | 134 | 162.65789 | 146.3253 |
| Discovery | C_HCC20: | 26984 | 4.10864262 | 0.97140091 | 34.9661423 | 200 | 245.125   | 212.9126 |
| Discovery | C_27     | 31679 | 3.18049784 | 0.92973535 | 14.2319075 | 110 | 180.08333 | 121.5232 |
| Discovery | C_HCC17: | 21788 | 2.89387242 | 0.83637739 | 6.11162465 | 169 | 201.59524 | 181.95   |
| Discovery | C_77     | 37382 | 2.18276313 | 0.82597488 | 5.74629669 | 53  | 69.333333 | 60.48276 |
| Discovery | C_63     | 33013 | 3.46701627 | 0.94113207 | 16.9871775 | 136 | 149.78125 | 142.7395 |
| Discovery | C_105    | 24204 | 3.42585459 | 0.94006676 | 16.6852309 | 137 | 175.22727 | 146.29   |
| Discovery | C_91     | 66149 | 2.73493798 | 0.86944965 | 7.65987984 | 127 | 147.63158 | 139.069  |
| Discovery | C_29     | 37331 | 3.8012224  | 0.95190746 | 20.7932456 | 193 | 245.53125 | 209.023  |
| Discovery | C_HCC23: | 26370 | 2.99454648 | 0.92323608 | 13.0269525 | 99  | 128.38889 | 108.4706 |
| Discovery | C_22     | 28368 | 3.95840143 | 0.96004393 | 25.0274892 | 268 | 365.78571 | 297.7416 |
| Discovery | C_41     | 52534 | 3.14350177 | 0.92484503 | 13.3058405 | 141 | 239       | 157.275  |
| Discovery | ELC_31   | 15523 | 3.04802158 | 0.93220565 | 14.7504915 | 82  | 102       | 90.33333 |

|            |          |       |            |            |            |     |           |          |
|------------|----------|-------|------------|------------|------------|-----|-----------|----------|
| Discovery  | ELC_19   | 17196 | 1.88529778 | 0.66133587 | 2.95277803 | 104 | 132.16667 | 113.8571 |
| Discovery  | ELC_44   | 15705 | 3.35297845 | 0.89818307 | 9.82154974 | 215 | 291.32692 | 239.1209 |
| Discovery  | ELC_56   | 15523 | 2.81217374 | 0.88813953 | 8.93970849 | 138 | 168.25    | 148.6868 |
| Discovery  | ELC_63   | 13507 | 2.9652819  | 0.92001499 | 12.5023425 | 111 | 137.18182 | 118.9234 |
| Discovery  | ELC_47   | 16026 | 3.2309004  | 0.90866343 | 10.9485167 | 169 | 214.125   | 182.6201 |
| Discovery  | ELC_20   | 13236 | 2.86598833 | 0.88925342 | 9.029624   | 165 | 198.62    | 180.8317 |
| Discovery  | ELC_43   | 17873 | 2.76772781 | 0.88151251 | 8.43970957 | 98  | 150.07143 | 110.2521 |
| Discovery  | ELC_13A  | 11044 | 2.83460346 | 0.8338738  | 6.01952002 | 123 | 156.8     | 132.0435 |
| Discovery  | ELC_33   | 18463 | 1.78447744 | 0.61589908 | 2.60348245 | 113 | 147.03125 | 124.3222 |
| Discovery  | ELC_40   | 18315 | 2.85771487 | 0.88271861 | 8.52650214 | 177 | 212.28    | 192.9053 |
| Discovery  | ELC_22   | 15576 | 3.25416342 | 0.92843578 | 13.9734641 | 126 | 167.14286 | 134.3316 |
| Discovery  | ELC_18   | 16295 | 2.93292703 | 0.9024887  | 10.2552216 | 93  | 109.05556 | 98.47651 |
| Discovery  | ELC_61   | 17139 | 3.21698152 | 0.91742733 | 12.1105446 | 139 | 199.16667 | 154.0146 |
| Discovery  | ELC_24   | 17022 | 1.97693146 | 0.78105713 | 4.56740156 | 52  | 116       | 58.66667 |
| Discovery  | ELC_29   | 12519 | 3.62409601 | 0.95079879 | 20.3247035 | 169 | 221.65385 | 181.1369 |
| Discovery  | ELC_42   | 18821 | 3.13321586 | 0.90887061 | 10.9734077 | 176 | 211.28    | 193.1818 |
| Discovery  | ELC_17   | 14654 | 2.479672   | 0.8182074  | 5.50077402 | 110 | 148.22727 | 120.3775 |
| Discovery  | ELC_38   | 13783 | 1.38397523 | 0.59527584 | 2.47081867 | 53  | 62.388889 | 57.6699  |
| Discovery  | ELC_7A   | 16114 | 2.38570229 | 0.73779047 | 3.81374387 | 121 | 201.08333 | 133.3652 |
| Discovery  | ELC_58   | 16154 | 3.00636752 | 0.91603904 | 11.9102969 | 115 | 133.61538 | 122.2222 |
| Discovery  | ELC_46   | 20053 | 3.69693834 | 0.94916494 | 19.6714613 | 201 | 245.1     | 215.9728 |
| Discovery  | ELC_25   | 16059 | 2.33649718 | 0.77125689 | 4.37171647 | 97  | 113.40909 | 103.1149 |
| Discovery  | ELC_51   | 16657 | 2.22469936 | 0.79890465 | 4.97276545 | 72  | 98.888889 | 80.94915 |
| Discovery  | ELC_117A | 15338 | 3.03031537 | 0.90270808 | 10.2783458 | 139 | 184.125   | 153.1048 |
| Discovery  | ELC_21   | 18852 | 2.44673571 | 0.84814056 | 6.58503698 | 106 | 179.14286 | 118.2404 |
| Discovery  | ELC_28   | 13012 | 2.77991033 | 0.88448334 | 8.65675968 | 116 | 130.28571 | 122.0829 |
| Discovery  | ELC_37   | 11043 | 2.98129118 | 0.80658081 | 5.17011792 | 205 | 287.88095 | 227.4602 |
| Discovery  | ELC_115A | 11676 | 3.35490773 | 0.92200503 | 12.8213389 | 187 | 244.6     | 203.9581 |
| Discovery  | ELC_48   | 16897 | 2.48543114 | 0.75045779 | 4.00733805 | 147 | 167.45455 | 156.604  |
| Discovery  | ELC_45   | 20135 | 2.77685929 | 0.89455361 | 9.48349209 | 107 | 219.5     | 118.105  |
| Discovery  | ELC_23   | 18514 | 3.08961092 | 0.90319989 | 10.3305671 | 169 | 247.02778 | 190.3893 |
| Discovery  | ELC_41   | 19883 | 2.53914975 | 0.88140137 | 8.43180083 | 66  | 98.4      | 72.99029 |
| Discovery  | ELC_35   | 17692 | 2.41317816 | 0.83360466 | 6.00978378 | 81  | 89.166667 | 86.81132 |
| Discovery  | ELC_8A   | 17573 | 2.31674692 | 0.82900694 | 5.84819057 | 77  | 99.222222 | 84.40741 |
| Discovery  | ELC_65A  | 16375 | 1.24862216 | 0.45024475 | 1.81899125 | 62  | 80.0625   | 69.01031 |
| Discovery  | ELC_52   | 21236 | 2.31275076 | 0.7702962  | 4.35343247 | 125 | 210.5625  | 139.9762 |
| Discovery  | ELC_11   | 16073 | 2.10072831 | 0.7928953  | 4.82847561 | 60  | 79.6      | 65.15789 |
| Discovery  | ELC_36   | 16013 | 2.98176959 | 0.83672607 | 6.12467654 | 207 | 245.20455 | 219.4545 |
| Discovery  | ELC_30   | 16993 | 2.75878901 | 0.86365704 | 7.33444539 | 134 | 149.68    | 144.5    |
| Validation | H_48     | 65698 |            |            |            |     |           |          |
| Validation | H_N69    | 27642 |            |            |            |     |           |          |
| Validation | H_N5     | 27181 |            |            |            |     |           |          |
| Validation | H_57     | 77587 |            |            |            |     |           |          |
| Validation | H_49     | 69888 |            |            |            |     |           |          |
| Validation | H_43     | 58724 |            |            |            |     |           |          |
| Validation | H_45     | 61465 |            |            |            |     |           |          |
| Validation | H_N16    | 35747 |            |            |            |     |           |          |
| Validation | H_30     | 34944 |            |            |            |     |           |          |
| Validation | H_74     | 58996 |            |            |            |     |           |          |
| Validation | H_50     | 53444 |            |            |            |     |           |          |
| Validation | C_65     | 34728 |            |            |            |     |           |          |

|                         |          |       |
|-------------------------|----------|-------|
| Validation              | C_31     | 38955 |
| Validation              | C_99     | 33557 |
| Validation              | C_76     | 31221 |
| Validation              | C_37     | 28351 |
| Validation              | C_HCC20  | 26398 |
| Validation              | C_66     | 27448 |
| Validation              | C_HCC17: | 27226 |
| Validation              | C_78     | 31762 |
| Validation              | C_107    | 30408 |
| Validation              | C_35     | 60454 |
| Independent diagnosis 1 | C_104    | 24238 |
| Independent diagnosis 1 | C_40     | 53297 |
| Independent diagnosis 1 | C_43     | 59174 |
| Independent diagnosis 1 | C_48     | 27393 |
| Independent diagnosis 1 | C_57     | 36804 |
| Independent diagnosis 1 | C_67     | 27051 |
| Independent diagnosis 1 | C_HCC21: | 35908 |
| Independent diagnosis 1 | C_HCC21: | 24383 |
| Independent diagnosis 1 | C_HCC22: | 30643 |
| Independent diagnosis 1 | C_HCC23: | 31685 |
| Independent diagnosis 1 | C_15     | 50627 |
| Independent diagnosis 1 | C_2      | 47705 |
| Independent diagnosis 1 | C_80     | 34443 |
| Independent diagnosis 1 | C_84     | 30682 |
| Independent diagnosis 1 | C_87     | 63127 |
| Independent diagnosis 1 | C_93     | 58106 |
| Independent diagnosis 1 | C_HCC19: | 26113 |
| Independent diagnosis 1 | C_HCC23' | 31914 |
| Independent diagnosis 1 | C_HCC23: | 26386 |
| Independent diagnosis 1 | H_75     | 57624 |
| Independent diagnosis 1 | H_35     | 32963 |
| Independent diagnosis 1 | H_N64    | 26367 |
| Independent diagnosis 1 | H_N7     | 30612 |
| Independent diagnosis 1 | H_60     | 63797 |
| Independent diagnosis 1 | H_2      | 29343 |
| Independent diagnosis 1 | H_68     | 66889 |
| Independent diagnosis 1 | H_N259   | 24107 |
| Independent diagnosis 1 | H_10     | 28647 |
| Independent diagnosis 1 | H_N261   | 34119 |
| Independent diagnosis 1 | H_39     | 36406 |
| Independent diagnosis 1 | H_56     | 64960 |
| Independent diagnosis 1 | H_N171   | 21217 |
| Independent diagnosis 1 | H_N58    | 34269 |
| Independent diagnosis 1 | H_18     | 38057 |
| Independent diagnosis 1 | H_N49    | 32881 |
| Independent diagnosis 1 | H_38     | 40641 |
| Independent diagnosis 1 | H_N160   | 21482 |
| Independent diagnosis 1 | H_29     | 38046 |
| Independent diagnosis 1 | H_66     | 61599 |
| Independent diagnosis 1 | H_19     | 29769 |
| Independent diagnosis 1 | H_N86    | 22029 |

|                                  |       |
|----------------------------------|-------|
| Independent diagnosis 1 H_N21    | 26304 |
| Independent diagnosis 1 H_51     | 74358 |
| Independent diagnosis 1 H_67     | 67768 |
| Independent diagnosis 1 H_N63    | 28910 |
| Independent diagnosis 1 H_7      | 26442 |
| Independent diagnosis 1 H_72     | 53554 |
| Independent diagnosis 1 H_N176   | 21016 |
| Independent diagnosis 1 H_32     | 35520 |
| Independent diagnosis 1 H_N70    | 27332 |
| Independent diagnosis 1 H_59     | 72149 |
| Independent diagnosis 1 H_N47    | 33285 |
| Independent diagnosis 1 H_58     | 66359 |
| Independent diagnosis 1 H_N65    | 29810 |
| Independent diagnosis 1 H_31     | 33303 |
| Independent diagnosis 1 H_11     | 28475 |
| Independent diagnosis 1 H_21     | 36469 |
| Independent diagnosis 1 H_N97    | 28934 |
| Independent diagnosis 1 H_65     | 71987 |
| Independent diagnosis 1 H_N101   | 25128 |
| Independent diagnosis 1 H_41     | 65878 |
| Independent diagnosis 1 H_3      | 33514 |
| Independent diagnosis 1 H_N12231 | 27139 |
| Independent diagnosis 1 H_N104   | 21790 |
| Independent diagnosis 2 C_103    | 21736 |
| Independent diagnosis 2 C_108    | 35982 |
| Independent diagnosis 2 C_110    | 40650 |
| Independent diagnosis 2 C_21     | 26496 |
| Independent diagnosis 2 C_26     | 29048 |
| Independent diagnosis 2 C_33     | 41734 |
| Independent diagnosis 2 C_42     | 49917 |
| Independent diagnosis 2 C_52     | 34835 |
| Independent diagnosis 2 C_55     | 34008 |
| Independent diagnosis 2 C_56     | 41137 |
| Independent diagnosis 2 C_72     | 28673 |
| Independent diagnosis 2 C_8      | 27445 |
| Independent diagnosis 2 C_98     | 32909 |
| Independent diagnosis 2 C_HCC16: | 26727 |
| Independent diagnosis 2 C_HCC17' | 29569 |
| Independent diagnosis 2 C_HCC18: | 27811 |
| Independent diagnosis 2 C_HCC18: | 28885 |
| Independent diagnosis 2 C_HCC19  | 22291 |
| Independent diagnosis 2 C_HCC19: | 19316 |
| Independent diagnosis 2 C_HCC19: | 34291 |
| Independent diagnosis 2 C_HCC21  | 26146 |
| Independent diagnosis 2 C_HCC21: | 27912 |
| Independent diagnosis 2 C_HCC21' | 30981 |
| Independent diagnosis 2 C_HCC22: | 27031 |
| Independent diagnosis 2 C_HCC22' | 26198 |
| Independent diagnosis 2 C_HCC22' | 25984 |
| Independent diagnosis 2 C_HCC23: | 30487 |
| Independent diagnosis 2 C_HCC24: | 25872 |

|                                 |       |
|---------------------------------|-------|
| Independent diagnosis 2 C_HCC24 | 24370 |
| Independent diagnosis 2 C_HCC27 | 24824 |
| Independent diagnosis 2 C_16    | 31120 |
| Independent diagnosis 2 C_17    | 23516 |
| Independent diagnosis 2 C_25    | 32689 |
| Independent diagnosis 2 C_3     | 30143 |
| Independent diagnosis 2 C_30    | 26654 |
| Independent diagnosis 2 C_4     | 35007 |
| Independent diagnosis 2 C_45    | 27215 |
| Independent diagnosis 2 C_50    | 41450 |
| Independent diagnosis 2 C_59    | 63172 |
| Independent diagnosis 2 C_71    | 36864 |
| Independent diagnosis 2 C_79    | 42832 |
| Independent diagnosis 2 C_9     | 37671 |
| Independent diagnosis 2 C_92    | 55931 |
| Independent diagnosis 2 C_HCC17 | 26582 |
| Independent diagnosis 2 C_HCC23 | 30392 |

**Table S4. Stool form scale and stool moisture in all samples**

| Stage     | Sample  | Group | Stool character | Stool colour    | Stool moisture |
|-----------|---------|-------|-----------------|-----------------|----------------|
| Discovery | H_20    | H     | Soft            | yellow          | 0.6908176      |
| Discovery | H_N204  | H     | Soft            | yellow          | 0.7094017      |
| Discovery | H_37    | H     | Soft            | yellow          | 0.7262326      |
| Discovery | H_N68   | H     | Soft            | yellow          | 0.7757906      |
| Discovery | H_44    | H     | Soft            | yellow          | 0.669587       |
| Discovery | H_N105  | H     | Soft            | yellow          | 0.692843       |
| Discovery | H_34    | H     | Soft            | yellow          | 0.6787747      |
| Discovery | H_N39   | H     | Soft            | yellowish-brown | 0.7443627      |
| Discovery | H_52    | H     | Soft            | yellow          | 0.7046929      |
| Discovery | H_17    | H     | Soft            | yellow          | 0.7313084      |
| Discovery | H_N50   | H     | Soft            | yellow          | 0.8018927      |
| Discovery | H_73    | H     | Soft            | yellow          | 0.774048       |
| Discovery | H_22    | H     | Soft            | yellow          | 0.8075428      |
| Discovery | H_8     | H     | Soft            | yellow          | 0.7525916      |
| Discovery | H_71    | H     | Soft            | yellowish-brown | 0.7181088      |
| Discovery | H_N91   | H     | Soft            | yellow          | 0.7842633      |
| Discovery | H_24    | H     | Soft            | yellow          | 0.6892294      |
| Discovery | H_N76   | H     | Soft            | yellow          | 0.7370536      |
| Discovery | H_54    | H     | Soft            | yellow          | 0.6806004      |
| Discovery | H_N181  | H     | Soft            | yellow          | 0.7603774      |
| Discovery | H_N1212 | H     | Soft            | yellow          | 0.6954582      |
| Discovery | H_15    | H     | Soft            | yellow          | 0.7828631      |
| Discovery | H_46    | H     | Soft            | yellow          | 0.6853843      |
| Discovery | H_N132  | H     | Soft            | yellowish-brown | 0.7458127      |
| Discovery | H_N260  | H     | Soft            | yellow          | 0.7230494      |
| Discovery | H_70    | H     | Soft            | yellow          | 0.7764464      |
| Discovery | H_27    | H     | Soft            | yellow          | 0.7314158      |
| Discovery | H_N57   | H     | Soft            | yellow          | 0.7454455      |
| Discovery | H_N72   | H     | Soft            | yellow          | 0.7644062      |
| Discovery | H_77    | H     | Soft            | yellow          | 0.7310055      |
| Discovery | H_N197  | H     | Soft            | yellow          | 0.7432719      |
| Discovery | H_6     | H     | Soft            | yellow          | 0.8180589      |
| Discovery | H_N55   | H     | Soft            | yellow          | 0.7456116      |
| Discovery | H_64    | H     | Soft            | yellowish-brown | 0.7207494      |
| Discovery | H_63    | H     | Soft            | yellow          | 0.812577       |
| Discovery | H_53    | H     | Soft            | yellow          | 0.7456701      |
| Discovery | H_5     | H     | Soft            | yellow          | 0.8239762      |
| Discovery | H_N264  | H     | Soft            | yellow          | 0.7442554      |
| Discovery | H_N1022 | H     | Soft            | yellow          | 0.7422028      |
| Discovery | H_76    | H     | Soft            | yellow          | 0.6816307      |
| Discovery | H_40    | H     | Soft            | yellow          | 0.7738431      |
| Discovery | H_N145  | H     | Soft            | yellow          | 0.8181268      |
| Discovery | H_N258  | H     | Soft            | yellow          | 0.7120494      |
| Discovery | H_14    | H     | Soft            | yellow          | 0.7854464      |
| Discovery | H_13    | H     | Soft            | yellow          | 0.7214158      |
| Discovery | H_55    | H     | Soft            | yellowish-brown | 0.7364455      |
| Discovery | H_25    | H     | Soft            | yellow          | 0.7324062      |
| Discovery | H_N109  | H     | Soft            | yellow          | 0.7250055      |
| Discovery | H_61    | H     | Soft            | yellow          | 0.7342719      |
| Discovery | H_28    | H     | Soft            | yellow          | 0.7233589      |
| Discovery | H_N177  | H     | Soft            | yellow          | 0.7336116      |
| Discovery | H_9     | H     | Soft            | yellow          | 0.7842999      |
| Discovery | H_33    | H     | Soft            | yellow          | 0.7577474      |
| Discovery | H_26    | H     | Soft            | yellow          | 0.6564363      |
| Discovery | H_N40   | H     | Soft            | yellow          | 0.7369287      |



|           |         |     |      |                 |           |
|-----------|---------|-----|------|-----------------|-----------|
| Discovery | H_N121  | H   | Soft | yellowish-brown | 0.7553084 |
| Discovery | H_23    | H   | Soft | yellow          | 0.7628927 |
| Discovery | H_N56   | H   | Soft | yellow          | 0.7404795 |
| Discovery | H_N164  | H   | Soft | yellow          | 0.7275428 |
| Discovery | H_12    | H   | Soft | yellow          | 0.7685916 |
| Discovery | H_N75   | H   | Soft | yellow          | 0.7241088 |
| Discovery | H_47    | H   | Soft | yellow          | 0.6772633 |
| Discovery | H_N84   | H   | Soft | yellow          | 0.7762294 |
| Discovery | H_42    | H   | Soft | yellow          | 0.7770536 |
| Discovery | H_N9    | H   | Soft | yellowish-brown | 0.6796004 |
| Discovery | H_N52   | H   | Soft | yellow          | 0.6853774 |
| Discovery | H_62    | H   | Soft | yellow          | 0.6884582 |
| Discovery | H_1     | H   | Soft | yellow          | 0.7779305 |
| Discovery | H_N111  | H   | Soft | yellow          | 0.786524  |
| Discovery | H_N54   | H   | Soft | yellow          | 0.7798688 |
| Discovery | H_N102  | H   | Soft | yellow          | 0.7436464 |
| Discovery | H_4     | H   | Soft | yellow          | 0.7211794 |
| Discovery | H_36    | H   | Soft | yellow          | 0.8211475 |
| Discovery | H_16    | H   | Soft | yellowish-brown | 0.7644441 |
| Discovery | H_69    | H   | Soft | yellow          | 0.732281  |
| Discovery | C_82    | HCC | Soft | yellow          | 0.8120259 |
| Discovery | C_62    | HCC | Soft | yellow          | 0.7547085 |
| Discovery | C_60    | HCC | Soft | yellow          | 0.8120414 |
| Discovery | C_32    | HCC | Soft | yellow          | 0.7123464 |
| Discovery | C_HCC20 | HCC | Soft | yellow          | 0.7340009 |
| Discovery | C_11    | HCC | Soft | yellow          | 0.7921305 |
| Discovery | C_75    | HCC | Soft | yellow          | 0.753224  |
| Discovery | C_61    | HCC | Soft | yellow          | 0.7658688 |
| Discovery | C_88    | HCC | Soft | yellow          | 0.7436464 |
| Discovery | C_18    | HCC | Soft | yellowish-brown | 0.7179414 |
| Discovery | C_HCC17 | HCC | Soft | yellow          | 0.8147545 |
| Discovery | C_HCC17 | HCC | Soft | yellow          | 0.7444062 |
| Discovery | C_94    | HCC | Soft | yellow          | 0.7281006 |
| Discovery | C_36    | HCC | Soft | yellow          | 0.7502719 |
| Discovery | C_HCC22 | HCC | Soft | yellow          | 0.7266681 |
| Discovery | C_12    | HCC | Soft | yellow          | 0.7495561 |
| Discovery | C_101   | HCC | Soft | yellowish-brown | 0.7163075 |
| Discovery | C_86    | HCC | Soft | yellow          | 0.7262258 |
| Discovery | C_106   | HCC | Soft | yellow          | 0.8184567 |
| Discovery | C_HCC20 | HCC | Soft | yellow          | 0.7401598 |
| Discovery | C_54    | HCC | Soft | yellow          | 0.8157843 |
| Discovery | C_69    | HCC | Soft | yellow          | 0.7812203 |
| Discovery | C_85    | HCC | Soft | yellow          | 0.7576259 |
| Discovery | C_73    | HCC | Soft | yellow          | 0.7566197 |
| Discovery | C_64    | HCC | Soft | yellow          | 0.732717  |
| Discovery | C_HCC23 | HCC | Soft | yellow          | 0.733129  |
| Discovery | C_HCC16 | HCC | Soft | yellow          | 0.7749642 |
| Discovery | C_28    | HCC | Soft | yellow          | 0.7647502 |
| Discovery | C_46    | HCC | Soft | yellowish-brown | 0.7581508 |
| Discovery | C_HCC22 | HCC | Soft | yellow          | 0.8077914 |
| Discovery | C_89    | HCC | Soft | yellow          | 0.7205357 |
| Discovery | C_14    | HCC | Soft | yellow          | 0.6960038 |
| Discovery | C_20    | HCC | Soft | yellow          | 0.7503774 |
| Discovery | C_90    | HCC | Soft | yellow          | 0.7581673 |
| Discovery | C_HCC17 | HCC | Soft | yellow          | 0.6630705 |
| Discovery | C_19    | HCC | Soft | yellow          | 0.7538431 |
| Discovery | C_7     | HCC | Soft | yellow          | 0.7412679 |

|           |         |     |      |                 |           |
|-----------|---------|-----|------|-----------------|-----------|
| Discovery | C_HCC21 | HCC | Soft | yellow          | 0.7258904 |
| Discovery | C_HCC22 | HCC | Soft | yellowish-brown | 0.7768535 |
| Discovery | C_HCC16 | HCC | Soft | yellow          | 0.8140898 |
| Discovery | C_HCC23 | HCC | Soft | yellow          | 0.7264126 |
| Discovery | C_102   | HCC | Soft | yellow          | 0.8028647 |
| Discovery | C_13    | HCC | Soft | yellow          | 0.795372  |
| Discovery | C_83    | HCC | Soft | yellow          | 0.7240275 |
| Discovery | C_74    | HCC | Soft | yellow          | 0.7687987 |
| Discovery | C_38    | HCC | Soft | yellow          | 0.7464464 |
| Discovery | C_109   | HCC | Soft | yellow          | 0.8141416 |
| Discovery | C_49    | HCC | Soft | yellow          | 0.7475445 |
| Discovery | C_47    | HCC | Soft | yellow          | 0.743062  |
| Discovery | C_39    | HCC | Soft | yellowish-brown | 0.7100551 |
| Discovery | C_44    | HCC | Soft | yellow          | 0.7502719 |
| Discovery | C_34    | HCC | Soft | yellow          | 0.7246681 |
| Discovery | C_24    | HCC | Soft | yellow          | 0.7456116 |
| Discovery | C_10    | HCC | Soft | yellow          | 0.7130494 |
| Discovery | C_6     | HCC | Soft | yellow          | 0.6946446 |
| Discovery | C_58    | HCC | Soft | yellow          | 0.7414158 |
| Discovery | C_53    | HCC | Soft | yellow          | 0.7375445 |
| Discovery | C_68    | HCC | Soft | yellowish-brown | 0.7244062 |
| Discovery | C_23    | HCC | Soft | yellow          | 0.7210055 |
| Discovery | C_81    | HCC | Soft | yellow          | 0.7532719 |
| Discovery | C_51    | HCC | Soft | yellow          | 0.7380589 |
| Discovery | C_HCC18 | HCC | Soft | yellow          | 0.7556116 |
| Discovery | C_95    | HCC | Soft | yellow          | 0.7307494 |
| Discovery | C_HCC17 | HCC | Soft | yellow          | 0.682577  |
| Discovery | C_HCC20 | HCC | Soft | yellow          | 0.724567  |
| Discovery | C_27    | HCC | Soft | yellow          | 0.7159762 |
| Discovery | C_HCC17 | HCC | Soft | yellow          | 0.8184255 |
| Discovery | C_77    | HCC | Soft | yellow          | 0.7122028 |
| Discovery | C_63    | HCC | Soft | yellow          | 0.7327705 |
| Discovery | C_105   | HCC | Soft | yellowish-brown | 0.674296  |
| Discovery | C_91    | HCC | Soft | yellow          | 0.6812538 |
| Discovery | C_29    | HCC | Soft | yellow          | 0.7678846 |
| Discovery | C_HCC23 | HCC | Soft | yellow          | 0.7217793 |
| Discovery | C_22    | HCC | Soft | yellow          | 0.7678652 |
| Discovery | C_41    | HCC | Soft | yellow          | 0.7757987 |
| Discovery | ELC_31  | ELC | Soft | yellow          | 0.7564365 |
| Discovery | ELC_19  | ELC | Soft | yellow          | 0.7312118 |
| Discovery | ELC_44  | ELC | Soft | yellow          | 0.8222115 |
| Discovery | ELC_56  | ELC | Soft | yellowish-brown | 0.7566444 |
| Discovery | ELC_63  | ELC | Soft | yellow          | 0.7563228 |
| Discovery | ELC_47  | ELC | Soft | yellow          | 0.7231203 |
| Discovery | ELC_20  | ELC | Soft | yellow          | 0.7645471 |
| Discovery | ELC_43  | ELC | Soft | yellow          | 0.7321204 |
| Discovery | ELC_13A | ELC | Soft | yellow          | 0.8135235 |
| Discovery | ELC_33  | ELC | Soft | yellow          | 0.82634   |
| Discovery | ELC_40  | ELC | Soft | yellowish-brown | 0.7234158 |
| Discovery | ELC_22  | ELC | Soft | yellow          | 0.8125445 |
| Discovery | ELC_18  | ELC | Soft | yellow          | 0.7134062 |
| Discovery | ELC_61  | ELC | Soft | yellow          | 0.7350055 |
| Discovery | ELC_24  | ELC | Soft | yellow          | 0.7422272 |
| Discovery | ELC_29  | ELC | Soft | yellow          | 0.8213059 |
| Discovery | ELC_42  | ELC | Soft | yellow          | 0.7462612 |
| Discovery | ELC_17  | ELC | Soft | yellow          | 0.7215749 |
| Discovery | ELC_38  | ELC | Soft | yellow          | 0.7341577 |

|            |          |     |      |                 |           |
|------------|----------|-----|------|-----------------|-----------|
| Discovery  | ELC_7A   | ELC | Soft | yellow          | 0.8124567 |
| Discovery  | ELC_58   | ELC | Soft | yellow          | 0.7125976 |
| Discovery  | ELC_46   | ELC | Soft | yellow          | 0.8214255 |
| Discovery  | ELC_25   | ELC | Soft | yellow          | 0.7312203 |
| Discovery  | ELC_51   | ELC | Soft | yellowish-brown | 0.7215771 |
| Discovery  | ELC_117A | ELC | Soft | yellow          | 0.7635296 |
| Discovery  | ELC_21   | ELC | Soft | yellow          | 0.6789254 |
| Discovery  | ELC_28   | ELC | Soft | yellow          | 0.6813885 |
| Discovery  | ELC_37   | ELC | Soft | yellow          | 0.7121779 |
| Discovery  | ELC_115A | ELC | Soft | yellow          | 0.7324612 |
| Discovery  | ELC_48   | ELC | Soft | yellow          | 0.7325494 |
| Discovery  | ELC_45   | ELC | Soft | yellow          | 0.8214377 |
| Discovery  | ELC_23   | ELC | Soft | yellowish-brown | 0.7215567 |
| Discovery  | ELC_41   | ELC | Soft | yellow          | 0.7316976 |
| Discovery  | ELC_35   | ELC | Soft | yellow          | 0.8215426 |
| Discovery  | ELC_8A   | ELC | Soft | yellow          | 0.7222203 |
| Discovery  | ELC_65A  | ELC | Soft | yellow          | 0.7142771 |
| Discovery  | ELC_52   | ELC | Soft | yellow          | 0.689296  |
| Discovery  | ELC_11   | ELC | Soft | yellow          | 0.7352538 |
| Discovery  | ELC_36   | ELC | Soft | yellow          | 0.6698846 |
| Discovery  | ELC_30   | ELC | Soft | yellow          | 0.7413779 |
| Validation | H_48     | H   | Soft | yellow          | 0.7791799 |
| Validation | H_N69    | H   | Soft | yellow          | 0.7724436 |
| Validation | H_N5     | H   | Soft | yellowish-brown | 0.8214212 |
| Validation | H_57     | H   | Soft | yellow          | 0.6826211 |
| Validation | H_49     | H   | Soft | yellow          | 0.8162843 |
| Validation | H_43     | H   | Soft | yellow          | 0.795722  |
| Validation | H_45     | H   | Soft | yellow          | 0.7738626 |
| Validation | H_N16    | H   | Soft | yellow          | 0.772362  |
| Validation | H_30     | H   | Soft | yellow          | 0.815717  |
| Validation | H_74     | H   | Soft | yellowish-brown | 0.7215129 |
| Validation | H_50     | H   | Soft | yellow          | 0.7628964 |
| Validation | H_75     | H   | Soft | yellow          | 0.758275  |
| Validation | H_35     | H   | Soft | yellow          | 0.6724151 |
| Validation | H_N64    | H   | Soft | yellow          | 0.7231791 |
| Validation | H_N7     | H   | Soft | yellow          | 0.7145536 |
| Validation | H_60     | H   | Soft | yellow          | 0.6889038 |
| Validation | H_2      | H   | Soft | yellow          | 0.6623774 |
| Validation | H_68     | H   | Soft | yellow          | 0.6812167 |
| Validation | H_N259   | H   | Soft | yellow          | 0.6723071 |
| Validation | H_10     | H   | Soft | yellow          | 0.7312178 |
| Validation | H_N261   | H   | Soft | yellow          | 0.7245461 |
| Validation | H_39     | H   | Soft | yellowish-brown | 0.7675494 |
| Validation | H_56     | H   | Soft | yellow          | 0.7314377 |
| Validation | H_N171   | H   | Soft | yellow          | 0.8245567 |
| Validation | H_N58    | H   | Soft | yellow          | 0.7326976 |
| Validation | H_18     | H   | Soft | yellow          | 0.7475426 |
| Validation | H_N49    | H   | Soft | yellow          | 0.745622  |
| Validation | H_38     | H   | Soft | yellow          | 0.7234277 |
| Validation | H_N160   | H   | Soft | yellow          | 0.69296   |
| Validation | H_29     | H   | Soft | yellow          | 0.6525377 |
| Validation | H_66     | H   | Soft | yellow          | 0.6701458 |
| Validation | H_19     | H   | Soft | yellow          | 0.7351378 |
| Validation | H_N86    | H   | Soft | yellow          | 0.7217378 |
| Validation | H_N21    | H   | Soft | yellowish-brown | 0.7681799 |
| Validation | H_51     | H   | Soft | yellow          | 0.7687244 |
| Validation | H_67     | H   | Soft | yellow          | 0.8314212 |

|            |          |     |      |                 |           |
|------------|----------|-----|------|-----------------|-----------|
| Validation | H_N63    | H   | Soft | yellow          | 0.7476211 |
| Validation | H_7      | H   | Soft | yellow          | 0.7312284 |
| Validation | H_72     | H   | Soft | yellow          | 0.788722  |
| Validation | H_N176   | H   | Soft | yellow          | 0.7698626 |
| Validation | H_32     | H   | Soft | yellowish-brown | 0.7682362 |
| Validation | H_N70    | H   | Soft | yellow          | 0.8211317 |
| Validation | H_59     | H   | Soft | yellow          | 0.7214151 |
| Validation | H_N47    | H   | Soft | yellow          | 0.7695865 |
| Validation | H_58     | H   | Soft | yellow          | 0.7889799 |
| Validation | H_N65    | H   | Soft | yellow          | 0.7712436 |
| Validation | H_31     | H   | Soft | yellow          | 0.8256212 |
| Validation | H_11     | H   | Soft | yellow          | 0.7346211 |
| Validation | H_21     | H   | Soft | yellow          | 0.7687644 |
| Validation | H_N97    | H   | Soft | yellow          | 0.7456323 |
| Validation | H_65     | H   | Soft | yellow          | 0.822112  |
| Validation | H_N101   | H   | Soft | yellowish-brown | 0.7785547 |
| Validation | H_41     | H   | Soft | yellow          | 0.682512  |
| Validation | H_3      | H   | Soft | yellow          | 0.8214523 |
| Validation | H_N12231 | H   | Soft | yellow          | 0.697534  |
| Validation | H_N104   | H   | Soft | yellow          | 0.7414158 |
| Validation | C_65     | HCC | Soft | yellow          | 0.7215406 |
| Validation | C_31     | HCC | Soft | yellow          | 0.7426006 |
| Validation | C_99     | HCC | Soft | yellow          | 0.7226227 |
| Validation | C_76     | HCC | Soft | yellow          | 0.6715306 |
| Validation | C_37     | HCC | Soft | yellow          | 0.8312268 |
| Validation | C_HCC20  | HCC | Soft | yellow          | 0.741689  |
| Validation | C_66     | HCC | Soft | yellow          | 0.7863853 |
| Validation | C_HCC17  | HCC | Soft | yellowish-brown | 0.791209  |
| Validation | C_78     | HCC | Soft | yellow          | 0.7317413 |
| Validation | C_107    | HCC | Soft | yellow          | 0.7312865 |
| Validation | C_35     | HCC | Soft | yellow          | 0.7887372 |
| Validation | C_104    | HCC | Soft | yellow          | 0.7526799 |
| Validation | C_40     | HCC | Soft | yellow          | 0.7662446 |
| Validation | C_43     | HCC | Soft | yellow          | 0.8215142 |
| Validation | C_48     | HCC | Soft | yellow          | 0.7796545 |
| Validation | C_57     | HCC | Soft | yellowish-brown | 0.7552062 |
| Validation | C_67     | HCC | Soft | yellow          | 0.7327055 |
| Validation | C_HCC21  | HCC | Soft | yellow          | 0.7635272 |
| Validation | C_HCC21  | HCC | Soft | yellow          | 0.8331668 |
| Validation | C_HCC22  | HCC | Soft | yellow          | 0.7227612 |
| Validation | C_HCC23  | HCC | Soft | yellow          | 0.7227049 |
| Validation | C_15     | HCC | Soft | yellow          | 0.6725645 |
| Validation | C_2      | HCC | Soft | yellow          | 0.6925416 |
| Validation | C_80     | HCC | Soft | yellow          | 0.7369545 |
| Validation | C_84     | HCC | Soft | yellowish-brown | 0.7325261 |
| Validation | C_87     | HCC | Soft | yellow          | 0.7314575 |
| Validation | C_93     | HCC | Soft | yellow          | 0.6916158 |
| Validation | C_HCC19  | HCC | Soft | yellow          | 0.8225457 |
| Validation | C_HCC23  | HCC | Soft | yellow          | 0.6816598 |
| Validation | C_HCC23  | HCC | Soft | yellow          | 0.7311426 |
| Validation | C_103    | HCC | Soft | yellow          | 0.7336577 |
| Validation | C_108    | HCC | Soft | yellowish-brown | 0.6752635 |
| Validation | C_110    | HCC | Soft | yellow          | 0.6684925 |
| Validation | C_21     | HCC | Soft | yellow          | 0.7759388 |
| Validation | C_26     | HCC | Soft | yellow          | 0.7311178 |
| Validation | C_33     | HCC | Soft | yellow          | 0.7538461 |
| Validation | C_42     | HCC | Soft | yellow          | 0.7481549 |

|             |         |     |      |                 |           |
|-------------|---------|-----|------|-----------------|-----------|
| Validation  | C_52    | HCC | Soft | yellow          | 0.8001438 |
| Validation  | C_55    | HCC | Soft | yellow          | 0.6667818 |
| Validation  | C_56    | HCC | Soft | yellow          | 0.7213402 |
| Validation  | C_72    | HCC | Soft | yellow          | 0.7228233 |
| Validation  | C_8     | HCC | Soft | yellowish-brown | 0.7821791 |
| Validation  | C_98    | HCC | Soft | yellow          | 0.758587  |
| Validation  | C_HCC16 | HCC | Soft | yellow          | 0.6813843 |
| Validation  | C_HCC17 | HCC | Soft | yellow          | 0.6801775 |
| Validation  | C_HCC18 | HCC | Soft | yellow          | 0.6583363 |
| Validation  | C_HCC18 | HCC | Soft | yellow          | 0.7231693 |
| Validation  | C_HCC19 | HCC | Soft | yellow          | 0.7401308 |
| Validation  | C_HCC19 | HCC | Soft | yellow          | 0.7611893 |
| Validation  | C_HCC19 | HCC | Soft | yellow          | 0.7801048 |
| Validation  | C_HCC21 | HCC | Soft | yellow          | 0.8112543 |
| Validation  | C_HCC21 | HCC | Soft | yellowish-brown | 0.7612526 |
| Validation  | C_HCC21 | HCC | Soft | yellow          | 0.7203088 |
| Validation  | C_HCC22 | HCC | Soft | yellow          | 0.8227717 |
| Validation  | C_HCC22 | HCC | Soft | yellow          | 0.7335129 |
| Validation  | C_HCC22 | HCC | Soft | yellow          | 0.7582896 |
| Validation  | C_HCC23 | HCC | Soft | yellow          | 0.7612275 |
| Validation  | C_HCC24 | HCC | Soft | yellow          | 0.6668415 |
| Validation  | C_HCC24 | HCC | Soft | yellow          | 0.7412179 |
| Validation  | C_HCC27 | HCC | Soft | yellow          | 0.7201554 |
| Validation  | C_16    | HCC | Soft | yellow          | 0.6799038 |
| Validation  | C_17    | HCC | Soft | yellow          | 0.7637377 |
| Validation  | C_25    | HCC | Soft | yellow          | 0.6779167 |
| Validation  | C_3     | HCC | Soft | yellowish-brown | 0.6803071 |
| Validation  | C_30    | HCC | Soft | yellow          | 0.7294178 |
| Validation  | C_4     | HCC | Soft | yellow          | 0.7302461 |
| Validation  | C_45    | HCC | Soft | yellow          | 0.7723494 |
| Validation  | C_50    | HCC | Soft | yellow          | 0.8297377 |
| Validation  | C_59    | HCC | Soft | yellow          | 0.8306567 |
| Validation  | C_71    | HCC | Soft | yellow          | 0.8289976 |
| Validation  | C_79    | HCC | Soft | yellow          | 0.8399426 |
| Validation  | C_9     | HCC | Soft | yellowish-brown | 0.752122  |
| Validation  | C_92    | HCC | Soft | yellow          | 0.7310277 |
| Validation  | C_HCC17 | HCC | Soft | yellow          | 0.68946   |
| Validation  | C_HCC23 | HCC | Soft | yellow          | 0.7633377 |
| Independent | XJ_1    | HCC | Soft | yellow          | 0.737822  |
| Independent | XJ_2    | HCC | Soft | yellow          | 0.7522277 |
| Independent | XJ_3    | HCC | Soft | yellow          | 0.68766   |
| Independent | XJ_4    | HCC | Soft | yellow          | 0.6663377 |
| Independent | XJ_5    | HCC | Soft | yellow          | 0.6696458 |
| Independent | XJ_6    | HCC | Soft | yellow          | 0.7402378 |
| Independent | XJ_7    | HCC | Soft | yellowish-brown | 0.7194378 |
| Independent | XJ_8    | HCC | Soft | yellow          | 0.7714799 |
| Independent | XJ_9    | HCC | Soft | yellow          | 0.7731244 |
| Independent | XJ_10   | HCC | Soft | yellow          | 0.8296212 |
| Independent | XJ_11   | HCC | Soft | yellow          | 0.6503211 |
| Independent | XJ_12   | HCC | Soft | yellow          | 0.7286284 |
| Independent | XJ_13   | HCC | Soft | yellow          | 0.790422  |
| Independent | XJ_14   | HCC | Soft | yellow          | 0.7702626 |
| Independent | XJ_15   | HCC | Soft | yellowish-brown | 0.7703362 |
| Independent | XJ_16   | HCC | Soft | yellow          | 0.7188317 |
| Independent | XJ_17   | HCC | Soft | yellow          | 0.8179151 |
| Independent | XJ_18   | HCC | Soft | yellow          | 0.7703865 |
| Independent | ZD_1    | HCC | Soft | yellow          | 0.7683436 |

|                    |     |      |                 |           |
|--------------------|-----|------|-----------------|-----------|
| Independent (ZD_2  | HCC | Soft | yellow          | 0.7307212 |
| Independent (ZD_3  | HCC | Soft | yellow          | 0.8298211 |
| Independent (ZD_4  | HCC | Soft | yellow          | 0.7714644 |
| Independent (ZD_5  | HCC | Soft | yellow          | 0.7501323 |
| Independent (ZD_6  | HCC | Soft | yellow          | 0.8112428 |
| Independent (ZD_7  | HCC | Soft | yellow          | 0.6535626 |
| Independent (ZD_8  | HCC | Soft | yellow          | 0.7207088 |
| Independent (ZD_9  | HCC | Soft | yellow          | 0.6953633 |
| Independent (ZD_10 | HCC | Soft | yellow          | 0.6885294 |
| Independent (ZD_11 | HCC | Soft | yellowish-brown | 0.7419536 |
| Independent (ZD_12 | HCC | Soft | yellow          | 0.6799004 |
| Independent (ZD_13 | HCC | Soft | yellow          | 0.6583774 |
| Independent (ZD_14 | HCC | Soft | yellow          | 0.6983582 |
| Independent (ZD_16 | HCC | Soft | yellow          | 0.6900843 |
| Independent (ZD_17 | HCC | Soft | yellow          | 0.7521127 |
| Independent (ZD_18 | HCC | Soft | yellow          | 0.7189494 |
| Independent (ZD_19 | HCC | Soft | yellow          | 0.6803464 |
| Independent (ZD_20 | HCC | Soft | yellowish-brown | 0.7296158 |
| Independent (ZD_21 | HCC | Soft | yellow          | 0.7503455 |
| Independent (ZD_22 | HCC | Soft | yellow          | 0.7597062 |
| Independent (ZD_23 | HCC | Soft | yellow          | 0.780062  |
| Independent (ZD_24 | HCC | Soft | yellow          | 0.823117  |
| Independent (ZD_25 | HCC | Soft | yellow          | 0.8197129 |
| Independent (ZD_26 | HCC | Soft | yellow          | 0.7589964 |
| Independent (ZD_27 | HCC | Soft | yellowish-brown | 0.761175  |
| Independent (ZD_28 | HCC | Soft | yellow          | 0.6697151 |
| Independent (ZD_29 | HCC | Soft | yellow          | 0.8199791 |
| Independent (ZD_30 | HCC | Soft | yellow          | 0.7099536 |
| Independent (ZD_31 | HCC | Soft | yellow          | 0.6905631 |
| Independent (ZD_32 | HCC | Soft | yellow          | 0.6913038 |
| Independent (ZD_33 | HCC | Soft | yellow          | 0.7589774 |
| Independent (ZD_34 | HCC | Soft | yellow          | 0.6789167 |
| Independent (ZD_35 | HCC | Soft | yellow          | 0.6697071 |
| Independent (ZD_36 | HCC | Soft | yellowish-brown | 0.7288178 |
| Independent (ZD_37 | HCC | Soft | yellow          | 0.7199461 |
| Independent (ZD_38 | HCC | Soft | yellow          | 0.7704494 |
| Independent (ZD_39 | HCC | Soft | yellow          | 0.8289377 |
| Independent (ZD_40 | HCC | Soft | yellow          | 0.8301567 |
| Independent (ZD_41 | HCC | Soft | yellow          | 0.8289976 |
| Independent (ZD_42 | HCC | Soft | yellow          | 0.7503426 |
| Independent (ZD_43 | HCC | Soft | yellow          | 0.751022  |
| Independent (ZD_44 | HCC | Soft | yellow          | 0.7197277 |
| Independent (ZD_45 | HCC | Soft | yellow          | 0.69036   |
| Independent (ZD_46 | HCC | Soft | yellow          | 0.6489377 |
| Independent (ZD_47 | HCC | Soft | yellow          | 0.6658458 |
| Independent (ZD_48 | HCC | Soft | yellow          | 0.7403378 |
| Independent (ZD_49 | HCC | Soft | yellowish-brown | 0.7188378 |
| Independent (ZD_50 | HCC | Soft | yellow          | 0.7711799 |
| Independent (ZD_51 | HCC | Soft | yellow          | 0.760375  |
| Independent (ZD_52 | HCC | Soft | yellow          | 0.7521632 |
| Independent (ZD_53 | HCC | Soft | yellow          | 0.8212312 |
| Independent (ZD_54 | HCC | Soft | yellow          | 0.7631455 |
| Independent (ZD_55 | HCC | Soft | yellow          | 0.8288204 |
| Independent (ZD_56 | HCC | Soft | yellow          | 0.8099235 |
| Independent (ZD_57 | HCC | Soft | yellow          | 0.73124   |
| Independent (ZD_58 | HCC | Soft | yellow          | 0.8310158 |
| Independent (ZD_59 | HCC | Soft | yellow          | 0.8099445 |

|                    |     |      |                 |           |
|--------------------|-----|------|-----------------|-----------|
| Independent (ZD_60 | HCC | Soft | yellowish-brown | 0.7099062 |
| Independent (ZD_61 | HCC | Soft | yellow          | 0.7401055 |
| Independent (ZD_62 | HCC | Soft | yellow          | 0.7388272 |
| Independent (ZD_63 | HCC | Soft | yellow          | 0.8188059 |
| Independent (ZD_64 | HCC | Soft | yellow          | 0.7501612 |
| Independent (ZD_65 | HCC | Soft | yellow          | 0.7189749 |
| Independent (ZD_66 | HCC | Soft | yellow          | 0.7381577 |
| Independent (ZD_67 | HCC | Soft | yellow          | 0.8095567 |
| Independent (ZD_68 | HCC | Soft | yellow          | 0.8099976 |
| Independent (ZD_69 | HCC | Soft | yellow          | 0.8213143 |
| Independent (ZD_70 | HCC | Soft | yellow          | 0.820417  |
| Independent (ZD_71 | HCC | Soft | yellow          | 0.8199129 |
| Independent (HN_1  | HCC | Soft | yellow          | 0.6699151 |
| Independent (HN_2  | HCC | Soft | yellow          | 0.8199791 |
| Independent (HN_3  | HCC | Soft | yellow          | 0.7098536 |
| Independent (HN_4  | HCC | Soft | yellow          | 0.6903038 |
| Independent (HN_5  | HCC | Soft | yellow          | 0.6599774 |
| Independent (HN_7  | HCC | Soft | yellow          | 0.6785167 |
| Independent (HN_6  | HCC | Soft | yellow          | 0.7588964 |
| Independent (HN_8  | HCC | Soft | yellowish-brown | 0.6689071 |
| Independent (HN_9  | HCC | Soft | yellow          | 0.7297178 |
| Independent (HN_10 | HCC | Soft | yellow          | 0.7199461 |

**Table S5. Different OTUs and the corresponding annotation in the discovery phase**

|          |                                                                                                |            |   |
|----------|------------------------------------------------------------------------------------------------|------------|---|
| OTU_333  | Bacteria                                                                                       | 0.04910604 | H |
| OTU_761  | Bacteria;Proteobacteria;Gammaproteobacteria;Pseudomonadales;Pseudomonadaceae;Pseudom           | 0.03430698 | H |
| OTU_415  | Bacteria;Proteobacteria;Betaproteobacteria;Burkholderiales;Sutterellaceae;Parasutterella       | 0.04910604 | H |
| OTU_9    | Bacteria;Proteobacteria;Alphaproteobacteria;Rhizobiales;Hyphomicrobiaceae;Gemmiger             | 0.00070265 | H |
| OTU_366  | Bacteria;Proteobacteria;Deltaproteobacteria;Desulfovibrionales;Desulfomicrobiaceae;Desulfor    | 0.02403397 | H |
| OTU_55   | Bacteria;Proteobacteria;Deltaproteobacteria;Desulfovibrionales;Desulfovibrionaceae;Bilophila   | 0.00064481 | H |
| OTU_312  | Bacteria;Lentisphaerae;Lentisphaeria;Victivallales;Victivallaceae;Victivallis                  | 0.00826379 | H |
| OTU_237  | Bacteria;Firmicutes;Erysipelotrichia;Erysipelotrichales;Erysipelotrichaceae;Coprobacillus      | 0.03324794 | H |
| OTU_38   | Bacteria;Firmicutes;Erysipelotrichia;Erysipelotrichales;Erysipelotrichaceae;Clostridium XVIII  | 0.01643066 | H |
| OTU_318  | Bacteria;Firmicutes;Erysipelotrichia;Erysipelotrichales;Erysipelotrichaceae;Clostridium XVIII  | 0.01685127 | H |
| OTU_218  | Bacteria;Firmicutes;Erysipelotrichia;Erysipelotrichales;Erysipelotrichaceae;Holdemania         | 0.00022908 | H |
| OTU_336  | Bacteria;Firmicutes;Erysipelotrichia;Erysipelotrichales;Erysipelotrichaceae;Erysipelotrichacea | 0.03261917 | H |
| OTU_131  | Bacteria;Firmicutes;Clostridia                                                                 | 0.00717705 | H |
| OTU_95   | Bacteria;Firmicutes;Clostridia;Clostridiales                                                   | 0.01172782 | H |
| OTU_99   | Bacteria;Firmicutes;Clostridia;Clostridiales                                                   | 0.03832177 | H |
| OTU_185  | Bacteria;Firmicutes;Clostridia;Clostridiales                                                   | 0.04910535 | H |
| OTU_245  | Bacteria;Firmicutes;Clostridia;Clostridiales                                                   | 0.04910604 | H |
| OTU_277  | Bacteria;Firmicutes;Clostridia;Clostridiales                                                   | 0.03561588 | H |
| OTU_295  | Bacteria;Firmicutes;Clostridia;Clostridiales                                                   | 0.04910604 | H |
| OTU_315  | Bacteria;Firmicutes;Clostridia;Clostridiales                                                   | 0.0492979  | H |
| OTU_708  | Bacteria;Firmicutes;Clostridia;Clostridiales;Peptostreptococcaceae;Peptostreptococcus          | 0.02403397 | H |
| OTU_47   | Bacteria;Firmicutes;Clostridia;Clostridiales;Lachnospiraceae                                   | 0.03525535 | H |
| OTU_784  | Bacteria;Firmicutes;Clostridia;Clostridiales;Lachnospiraceae                                   | 0.04910604 | H |
| OTU_127  | Bacteria;Firmicutes;Clostridia;Clostridiales;Lachnospiraceae;Lachnospiracea_incertae_sedis     | 0.0021455  | H |
| OTU_129  | Bacteria;Firmicutes;Clostridia;Clostridiales;Lachnospiraceae;Lachnospiracea_incertae_sedis     | 0.01024746 | H |
| OTU_171  | Bacteria;Firmicutes;Clostridia;Clostridiales;Lachnospiraceae;Lachnospiracea_incertae_sedis     | 0.02414735 | H |
| OTU_742  | Bacteria;Firmicutes;Clostridia;Clostridiales;Lachnospiraceae;Lachnospiracea_incertae_sedis     | 0.01923312 | H |
| OTU_1099 | Bacteria;Firmicutes;Clostridia;Clostridiales;Lachnospiraceae;Lachnospiracea_incertae_sedis     | 0.0407457  | H |
| OTU_117  | Bacteria;Firmicutes;Clostridia;Clostridiales;Lachnospiraceae;Clostridium XIVb                  | 0.01139679 | H |
| OTU_121  | Bacteria;Firmicutes;Clostridia;Clostridiales;Lachnospiraceae;Clostridium XIVb                  | 0.00125998 | H |
| OTU_309  | Bacteria;Firmicutes;Clostridia;Clostridiales;Lachnospiraceae;Clostridium XIVb                  | 0.02265545 | H |
| OTU_100  | Bacteria;Firmicutes;Clostridia;Clostridiales;Lachnospiraceae;Anaerostipes                      | 0.0001524  | H |
| OTU_52   | Bacteria;Firmicutes;Clostridia;Clostridiales;Lachnospiraceae;Coprococcus                       | 0.00694192 | H |
| OTU_207  | Bacteria;Firmicutes;Clostridia;Clostridiales;Lachnospiraceae;Coprococcus                       | 0.00289356 | H |
| OTU_33   | Bacteria;Firmicutes;Clostridia;Clostridiales;Lachnospiraceae;Clostridium XIVa                  | 0.02647375 | H |
| OTU_85   | Bacteria;Firmicutes;Clostridia;Clostridiales;Lachnospiraceae;Clostridium XIVa                  | 0.0347111  | H |
| OTU_356  | Bacteria;Firmicutes;Clostridia;Clostridiales;Lachnospiraceae;Clostridium XIVa                  | 0.02167794 | H |
| OTU_1150 | Bacteria;Firmicutes;Clostridia;Clostridiales;Lachnospiraceae;Clostridium XIVa                  | 0.03288939 | H |
| OTU_68   | Bacteria;Firmicutes;Clostridia;Clostridiales;Lachnospiraceae;Dorea                             | 0.00460352 | H |
| OTU_1243 | Bacteria;Firmicutes;Clostridia;Clostridiales;Lachnospiraceae;Dorea                             | 0.00796858 | H |
| OTU_344  | Bacteria;Firmicutes;Clostridia;Clostridiales;Clostridiales_Incertae Sedis XIII                 | 0.04397792 | H |
| OTU_22   | Bacteria;Firmicutes;Clostridia;Clostridiales;Ruminococcaceae                                   | 0.00487293 | H |
| OTU_57   | Bacteria;Firmicutes;Clostridia;Clostridiales;Ruminococcaceae                                   | 0.00030061 | H |
| OTU_93   | Bacteria;Firmicutes;Clostridia;Clostridiales;Ruminococcaceae                                   | 0.04382763 | H |
| OTU_210  | Bacteria;Firmicutes;Clostridia;Clostridiales;Ruminococcaceae                                   | 0.00094795 | H |
| OTU_229  | Bacteria;Firmicutes;Clostridia;Clostridiales;Ruminococcaceae                                   | 0.00717705 | H |
| OTU_927  | Bacteria;Firmicutes;Clostridia;Clostridiales;Ruminococcaceae                                   | 0.02588507 | H |
| OTU_1089 | Bacteria;Firmicutes;Clostridia;Clostridiales;Ruminococcaceae                                   | 0.02193434 | H |
| OTU_1091 | Bacteria;Firmicutes;Clostridia;Clostridiales;Ruminococcaceae                                   | 0.04545406 | H |
| OTU_61   | Bacteria;Firmicutes;Clostridia;Clostridiales;Ruminococcaceae;Flavonifractor                    | 0.0227665  | H |



|          |                                                                                             |                |
|----------|---------------------------------------------------------------------------------------------|----------------|
| OTU_128  | Bacteria;Firmicutes;Clostridia;Clostridiales;Ruminococcaceae;Butyricoccus                   | 1.1453E-06 H   |
| OTU_137  | Bacteria;Firmicutes;Clostridia;Clostridiales;Ruminococcaceae;Butyricoccus                   | 2.0587E-06 H   |
| OTU_29   | Bacteria;Firmicutes;Clostridia;Clostridiales;Ruminococcaceae;Oscillibacter                  | 0.03133896 H   |
| OTU_802  | Bacteria;Firmicutes;Clostridia;Clostridiales;Ruminococcaceae;Oscillibacter                  | 0.03572702 H   |
| OTU_27   | Bacteria;Firmicutes;Clostridia;Clostridiales;Ruminococcaceae;Ruminococcus                   | 0.00516054 H   |
| OTU_733  | Bacteria;Firmicutes;Clostridia;Clostridiales;Ruminococcaceae;Hydrogenoanaerobacterium       | 0.04910604 H   |
| OTU_126  | Bacteria;Firmicutes;Clostridia;Clostridiales;Ruminococcaceae;Clostridium IV                 | 0.00338941 H   |
| OTU_235  | Bacteria;Firmicutes;Clostridia;Clostridiales;Ruminococcaceae;Clostridium IV                 | 0.00045314 H   |
| OTU_482  | Bacteria;Firmicutes;Clostridia;Clostridiales;Ruminococcaceae;Clostridium IV                 | 0.02113542 H   |
| OTU_888  | Bacteria;Firmicutes;Clostridia;Clostridiales;Ruminococcaceae;Clostridium IV                 | 0.04910338 H   |
| OTU_77   | Bacteria;Bacteroidetes;Bacteroidia;Bacteroidales;Porphyromonadaceae;Odoribacter             | 0.00051653 H   |
| OTU_25   | Bacteria;Bacteroidetes;Bacteroidia;Bacteroidales;Porphyromonadaceae;Parabacteroides         | 0.0254832 H    |
| OTU_75   | Bacteria;Bacteroidetes;Bacteroidia;Bacteroidales;Porphyromonadaceae;Parabacteroides         | 0.00030361 H   |
| OTU_487  | Bacteria;Bacteroidetes;Bacteroidia;Bacteroidales;Porphyromonadaceae;Parabacteroides         | 0.00025918 H   |
| OTU_935  | Bacteria;Bacteroidetes;Bacteroidia;Bacteroidales;Porphyromonadaceae;Parabacteroides         | 0.02206171 H   |
| OTU_1110 | Bacteria;Bacteroidetes;Bacteroidia;Bacteroidales;Porphyromonadaceae;Parabacteroides         | 0.04233631 H   |
| OTU_109  | Bacteria;Bacteroidetes;Bacteroidia;Bacteroidales;Porphyromonadaceae;Barnesiella             | 0.02349014 H   |
| OTU_296  | Bacteria;Bacteroidetes;Bacteroidia;Bacteroidales;Porphyromonadaceae;Barnesiella             | 0.04910604 H   |
| OTU_139  | Bacteria;Bacteroidetes;Bacteroidia;Bacteroidales;Porphyromonadaceae;Butyricimonas           | 0.00908653 H   |
| OTU_297  | Bacteria;Bacteroidetes;Bacteroidia;Bacteroidales;Porphyromonadaceae;Butyricimonas           | 0.02956389 H   |
| OTU_551  | Bacteria;Bacteroidetes;Bacteroidia;Bacteroidales;Porphyromonadaceae;Butyricimonas           | 0.04910604 H   |
| OTU_71   | Bacteria;Bacteroidetes;Bacteroidia;Bacteroidales;Prevotellaceae;Paraprevotella              | 0.0054358 H    |
| OTU_14   | Bacteria;Bacteroidetes;Bacteroidia;Bacteroidales;Rikenellaceae;Alistipes                    | 0.00595129 H   |
| OTU_26   | Bacteria;Bacteroidetes;Bacteroidia;Bacteroidales;Rikenellaceae;Alistipes                    | 0.00066658 H   |
| OTU_162  | Bacteria;Bacteroidetes;Bacteroidia;Bacteroidales;Rikenellaceae;Alistipes                    | 0.04579384 H   |
| OTU_1109 | Bacteria;Bacteroidetes;Bacteroidia;Bacteroidales;Rikenellaceae;Alistipes                    | 0.03802521 H   |
| OTU_11   | Bacteria;Bacteroidetes;Bacteroidia;Bacteroidales;Bacteroidaceae;Bacteroides                 | 0.00429315 H   |
| OTU_21   | Bacteria;Bacteroidetes;Bacteroidia;Bacteroidales;Bacteroidaceae;Bacteroides                 | 0.00117486 H   |
| OTU_76   | Bacteria;Bacteroidetes;Bacteroidia;Bacteroidales;Bacteroidaceae;Bacteroides                 | 0.03265191 H   |
| OTU_179  | Bacteria;Bacteroidetes;Bacteroidia;Bacteroidales;Bacteroidaceae;Bacteroides                 | 0.02253333 H   |
| OTU_304  | Bacteria;Bacteroidetes;Bacteroidia;Bacteroidales;Bacteroidaceae;Bacteroides                 | 0.02403397 H   |
| OTU_835  | Bacteria;Bacteroidetes;Bacteroidia;Bacteroidales;Bacteroidaceae;Bacteroides                 | 0.01523857 H   |
| OTU_404  | Bacteria;Bacteroidetes;Bacteroidia;Bacteroidales;Bacteroidaceae;Anaerorhabdus               | 0.0319613 H    |
| OTU_484  | Bacteria;Bacteroidetes;Flavobacteria;Flavobacteriales                                       | 0.02403397 H   |
| OTU_49   | Bacteria;Verrucomicrobia;Verrucomicrobiae;Verrucomicrobiales;Verrucomicrobiaceae;Akker      | 0.02435897 H   |
| OTU_390  | Bacteria;Actinobacteria;Actinobacteria;Coriobacteriales;Coriobacteriaceae                   | 0.00019139 H   |
| OTU_87   | Bacteria;Actinobacteria;Actinobacteria;Coriobacteriales;Coriobacteriaceae;Collinsella       | 0.00315719 H   |
| OTU_320  | Bacteria;Actinobacteria;Actinobacteria;Coriobacteriales;Coriobacteriaceae;Collinsella       | 0.04910604 H   |
| OTU_244  | Bacteria;Actinobacteria;Actinobacteria;Coriobacteriales;Coriobacteriaceae;Eggerthella       | 1.6187E-05 H   |
| OTU_421  | Bacteria;Actinobacteria;Actinobacteria;Coriobacteriales;Coriobacteriaceae;Gordonibacter     | 0.01685127 H   |
| OTU_357  | Bacteria;Actinobacteria;Actinobacteria;Coriobacteriales;Coriobacteriaceae;Adlercreutzia     | 0.01685127 H   |
| OTU_35   | Bacteria;Actinobacteria;Actinobacteria;Bifidobacteriales;Bifidobacteriaceae;Bifidobacterium | 0.00477666 H   |
| OTU_749  | Bacteria;Actinobacteria;Actinobacteria;Bifidobacteriales;Bifidobacteriaceae;Bifidobacterium | 0.02936892 H   |
| OTU_814  | Bacteria                                                                                    | 0.02667975 eLC |
| OTU_873  | Bacteria;Proteobacteria                                                                     | 0.02667975 eLC |
| OTU_63   | Bacteria;Proteobacteria;Gammaproteobacteria;Enterobacteriales;Enterobacteriaceae            | 0.01241149 eLC |
| OTU_147  | Bacteria;Proteobacteria;Gammaproteobacteria;Enterobacteriales;Enterobacteriaceae;Citrobacte | 0.00153799 eLC |
| OTU_1032 | Bacteria;Proteobacteria;Gammaproteobacteria;Enterobacteriales;Enterobacteriaceae;Klebsiella | 0.00375361 eLC |
| OTU_427  | Bacteria;Proteobacteria;Gammaproteobacteria;Pasteurellales;Pasteurellaceae;Aggregatibacter  | 0.00799668 eLC |
| OTU_40   | Bacteria;Proteobacteria;Gammaproteobacteria;Pasteurellales;Pasteurellaceae;Haemophilus      | 0.03277962 eLC |
| OTU_446  | Bacteria;Proteobacteria;Epsilonproteobacteria;Campylobacteriales;Campylobacteraceae;Campy   | 0.04890448 eLC |

|          |                                                                                             |                |
|----------|---------------------------------------------------------------------------------------------|----------------|
| OTU_1064 | Bacteria;Proteobacteria;Betaproteobacteria;Neisseriales;Neisseriaceae                       | 0.02667975 eLC |
| OTU_45   | Bacteria;Proteobacteria;Betaproteobacteria;Burkholderiales;Sutterellaceae;Sutterella        | 0.01136419 eLC |
| OTU_161  | Bacteria;Proteobacteria;Deltaproteobacteria;Desulfovibrionales;Desulfovibrionaceae          | 0.00386084 eLC |
| OTU_285  | Bacteria;TM7;TM7_genera_incertae_sedis;TM7_genera_incertae_sedis;TM7_genera_incertae        | 0.0246178 eLC  |
| OTU_588  | Bacteria;Firmicutes;Erysipelotrichia;Erysipelotrichales;Erysipelotrichaceae                 | 0.01635875 eLC |
| OTU_98   | Bacteria;Firmicutes;Erysipelotrichia;Erysipelotrichales;Erysipelotrichaceae;Catenibacterium | 0.02262528 eLC |
| OTU_194  | Bacteria;Firmicutes;Bacilli;Lactobacillales;Leuconostocaceae;Weissella                      | 0.02667975 eLC |
| OTU_428  | Bacteria;Firmicutes;Bacilli;Lactobacillales;Streptococcaceae;Streptococcus                  | 0.04610916 eLC |
| OTU_473  | Bacteria;Firmicutes;Bacilli;Lactobacillales;Streptococcaceae;Streptococcus                  | 0.02667975 eLC |
| OTU_136  | Bacteria;Firmicutes;Bacilli;Lactobacillales;Lactobacillaceae;Lactobacillus                  | 0.00024442 eLC |
| OTU_190  | Bacteria;Firmicutes;Bacilli;Lactobacillales;Lactobacillaceae;Lactobacillus                  | 0.01734448 eLC |
| OTU_1197 | Bacteria;Firmicutes;Bacilli;Lactobacillales;Lactobacillaceae;Lactobacillus                  | 0.00861157 eLC |
| OTU_274  | Bacteria;Firmicutes;Clostridia;Clostridiales                                                | 0.0080392 eLC  |
| OTU_773  | Bacteria;Firmicutes;Clostridia;Clostridiales                                                | 0.04537526 eLC |
| OTU_840  | Bacteria;Firmicutes;Clostridia;Clostridiales;Clostridiales_Incertae_Sedis_XI;Peptoniphilus  | 0.02667975 eLC |
| OTU_636  | Bacteria;Firmicutes;Clostridia;Clostridiales;Clostridiales_Incertae_Sedis_XI;Finegoldia     | 0.02667975 eLC |
| OTU_1154 | Bacteria;Firmicutes;Clostridia;Clostridiales;Clostridiaceae 1;Clostridium sensu stricto     | 0.04626446 eLC |
| OTU_805  | Bacteria;Firmicutes;Clostridia;Clostridiales;Lachnospiraceae                                | 0.04526135 eLC |
| OTU_957  | Bacteria;Firmicutes;Clostridia;Clostridiales;Lachnospiraceae;Lachnospiraceae_incertae_sedis | 0.03896485 eLC |
| OTU_1025 | Bacteria;Firmicutes;Clostridia;Clostridiales;Lachnospiraceae;Lachnospiraceae_incertae_sedis | 0.00993872 eLC |
| OTU_1135 | Bacteria;Firmicutes;Clostridia;Clostridiales;Lachnospiraceae;Roseburia                      | 0.00823162 eLC |
| OTU_1275 | Bacteria;Firmicutes;Clostridia;Clostridiales;Lachnospiraceae;Coprococcus                    | 0.0107842 eLC  |
| OTU_442  | Bacteria;Firmicutes;Clostridia;Clostridiales;Ruminococcaceae                                | 0.04184689 eLC |
| OTU_443  | Bacteria;Firmicutes;Clostridia;Clostridiales;Ruminococcaceae                                | 0.02667975 eLC |
| OTU_836  | Bacteria;Firmicutes;Clostridia;Clostridiales;Ruminococcaceae                                | 0.04705076 eLC |
| OTU_860  | Bacteria;Firmicutes;Clostridia;Clostridiales;Ruminococcaceae;Flavonifractor                 | 0.02667975 eLC |
| OTU_298  | Bacteria;Firmicutes;Clostridia;Clostridiales;Ruminococcaceae;Ruminococcus                   | 0.02667975 eLC |
| OTU_674  | Bacteria;Firmicutes;Clostridia;Clostridiales;Ruminococcaceae;Clostridium IV                 | 0.04736771 eLC |
| OTU_255  | Bacteria;Firmicutes;Clostridia;Clostridiales;Ruminococcaceae;Faecalibacterium               | 0.00284107 eLC |
| OTU_219  | Bacteria;Firmicutes;Negativicutes;Selenomonadales;Veillonellaceae;Megasphaera               | 0.02667975 eLC |
| OTU_329  | Bacteria;Firmicutes;Negativicutes;Selenomonadales;Veillonellaceae;Megasphaera               | 0.00031201 eLC |
| OTU_714  | Bacteria;Firmicutes;Negativicutes;Selenomonadales;Veillonellaceae;Centipeda                 | 0.0028406 eLC  |
| OTU_34   | Bacteria;Firmicutes;Negativicutes;Selenomonadales;Veillonellaceae;Megamonas                 | 0.01512625 eLC |
| OTU_748  | Bacteria;Firmicutes;Negativicutes;Selenomonadales;Veillonellaceae;Megamonas                 | 0.00184085 eLC |
| OTU_50   | Bacteria;Firmicutes;Negativicutes;Selenomonadales;Veillonellaceae;Veillonella               | 0.00353136 eLC |
| OTU_278  | Bacteria;Firmicutes;Negativicutes;Selenomonadales;Veillonellaceae;Veillonella               | 0.00583095 eLC |
| OTU_258  | Bacteria;Firmicutes;Negativicutes;Selenomonadales;Veillonellaceae;Mitsuokella               | 0.02667975 eLC |
| OTU_1105 | Bacteria;Firmicutes;Negativicutes;Selenomonadales;Acidaminococcaceae;Phascolarctobacteri    | 0.03110228 eLC |
| OTU_661  | Bacteria;Bacteroidetes;Bacteroidia;Bacteroidales;Porphyromonadaceae;Porphyromonas           | 0.04465502 eLC |
| OTU_17   | Bacteria;Bacteroidetes;Bacteroidia;Bacteroidales;Prevotellaceae;Prevotella                  | 0.02193434 eLC |
| OTU_69   | Bacteria;Bacteroidetes;Bacteroidia;Bacteroidales;Prevotellaceae;Prevotella                  | 0.02904939 eLC |
| OTU_181  | Bacteria;Bacteroidetes;Bacteroidia;Bacteroidales;Prevotellaceae;Prevotella                  | 0.04184689 eLC |
| OTU_314  | Bacteria;Bacteroidetes;Bacteroidia;Bacteroidales;Prevotellaceae;Prevotella                  | 0.02667975 eLC |
| OTU_319  | Bacteria;Bacteroidetes;Bacteroidia;Bacteroidales;Prevotellaceae;Prevotella                  | 0.00861157 eLC |
| OTU_413  | Bacteria;Bacteroidetes;Bacteroidia;Bacteroidales;Prevotellaceae;Prevotella                  | 0.04884427 eLC |
| OTU_456  | Bacteria;Bacteroidetes;Bacteroidia;Bacteroidales;Prevotellaceae;Prevotella                  | 0.00284107 eLC |
| OTU_901  | Bacteria;Bacteroidetes;Bacteroidia;Bacteroidales;Prevotellaceae;Prevotella                  | 0.04184689 eLC |
| OTU_1124 | Bacteria;Bacteroidetes;Bacteroidia;Bacteroidales;Prevotellaceae;Prevotella                  | 0.01798725 eLC |
| OTU_1195 | Bacteria;Bacteroidetes;Bacteroidia;Bacteroidales;Prevotellaceae;Prevotella                  | 0.02667975 eLC |
| OTU_1217 | Bacteria;Bacteroidetes;Bacteroidia;Bacteroidales;Prevotellaceae;Prevotella                  | 0.00513415 eLC |
| OTU_1284 | Bacteria;Bacteroidetes;Bacteroidia;Bacteroidales;Prevotellaceae;Prevotella                  | 0.02667975 eLC |

|          |                                                                                                 |                |
|----------|-------------------------------------------------------------------------------------------------|----------------|
| OTU_1145 | Bacteria;Bacteroidetes;Bacteroidia;Bacteroidales;Bacteroidaceae;Bacteroides                     | 0.02667975 eLC |
| OTU_950  | Bacteria;Actinobacteria;Actinobacteria;Actinomycetales;Actinomycetaceae;Actinomyces             | 0.02667975 eLC |
| OTU_814  | Bacteria                                                                                        | 0.02667975 eLC |
| OTU_147  | Bacteria;Proteobacteria;Gammaproteobacteria;Enterobacteriales;Enterobacteriaceae;Citrobacte     | 0.01295487 eLC |
| OTU_1064 | Bacteria;Proteobacteria;Betaproteobacteria;Neisseriales;Neisseriaceae                           | 0.02667975 eLC |
| OTU_514  | Bacteria;Firmicutes                                                                             | 0.02667975 eLC |
| OTU_625  | Bacteria;Firmicutes;Erysipelotrichia;Erysipelotrichales;Erysipelotrichaceae;Clostridium XVIII   | 0.02667975 eLC |
| OTU_1197 | Bacteria;Firmicutes;Bacilli;Lactobacillales;Lactobacillaceae;Lactobacillus                      | 0.00861157 eLC |
| OTU_83   | Bacteria;Firmicutes;Clostridia;Clostridiales                                                    | 0.03658046 eLC |
| OTU_274  | Bacteria;Firmicutes;Clostridia;Clostridiales                                                    | 0.0080392 eLC  |
| OTU_291  | Bacteria;Firmicutes;Clostridia;Clostridiales                                                    | 0.0158863 eLC  |
| OTU_353  | Bacteria;Firmicutes;Clostridia;Clostridiales                                                    | 0.03876261 eLC |
| OTU_448  | Bacteria;Firmicutes;Clostridia;Clostridiales                                                    | 0.02667975 eLC |
| OTU_773  | Bacteria;Firmicutes;Clostridia;Clostridiales                                                    | 0.04913143 eLC |
| OTU_1029 | Bacteria;Firmicutes;Clostridia;Clostridiales                                                    | 0.02667975 eLC |
| OTU_840  | Bacteria;Firmicutes;Clostridia;Clostridiales;Clostridiales_Incertae Sedis XI;Peptoniphilus      | 0.02667975 eLC |
| OTU_636  | Bacteria;Firmicutes;Clostridia;Clostridiales;Clostridiales_Incertae Sedis XI;Finegoldia         | 0.02667975 eLC |
| OTU_805  | Bacteria;Firmicutes;Clostridia;Clostridiales;Lachnospiraceae                                    | 0.04705076 eLC |
| OTU_23   | Bacteria;Firmicutes;Clostridia;Clostridiales;Lachnospiraceae;Lachnospiraceae_incertain_sedis    | 0.02928695 eLC |
| OTU_521  | Bacteria;Firmicutes;Clostridia;Clostridiales;Lachnospiraceae;Anaerostipes                       | 0.04913143 eLC |
| OTU_70   | Bacteria;Firmicutes;Clostridia;Clostridiales;Lachnospiraceae;Coprococcus                        | 0.0498245 eLC  |
| OTU_721  | Bacteria;Firmicutes;Clostridia;Clostridiales;Lachnospiraceae;Clostridium XIVa                   | 0.04705076 eLC |
| OTU_1227 | Bacteria;Firmicutes;Clostridia;Clostridiales;Lachnospiraceae;Clostridium XIVa                   | 0.02667975 eLC |
| OTU_79   | Bacteria;Firmicutes;Clostridia;Clostridiales;Ruminococcaceae                                    | 0.01902918 eLC |
| OTU_785  | Bacteria;Firmicutes;Clostridia;Clostridiales;Ruminococcaceae                                    | 0.01635875 eLC |
| OTU_836  | Bacteria;Firmicutes;Clostridia;Clostridiales;Ruminococcaceae                                    | 0.04526135 eLC |
| OTU_942  | Bacteria;Firmicutes;Clostridia;Clostridiales;Ruminococcaceae;Oscillibacter                      | 0.03305287 eLC |
| OTU_154  | Bacteria;Firmicutes;Clostridia;Clostridiales;Ruminococcaceae;Ruminococcus                       | 0.02667975 eLC |
| OTU_193  | Bacteria;Firmicutes;Clostridia;Clostridiales;Ruminococcaceae;Clostridium IV                     | 0.0290119 eLC  |
| OTU_669  | Bacteria;Firmicutes;Clostridia;Clostridiales;Ruminococcaceae;Clostridium IV                     | 0.04705076 eLC |
| OTU_674  | Bacteria;Firmicutes;Clostridia;Clostridiales;Ruminococcaceae;Clostridium IV                     | 0.02064859 eLC |
| OTU_1294 | Bacteria;Firmicutes;Clostridia;Clostridiales;Ruminococcaceae;Faecalibacterium                   | 0.03829369 eLC |
| OTU_714  | Bacteria;Firmicutes;Negativicutes;Selenomonadales;Veillonellaceae;Centipeda                     | 0.01442887 eLC |
| OTU_28   | Bacteria;Firmicutes;Negativicutes;Selenomonadales;Veillonellaceae;Dialister                     | 0.01350441 eLC |
| OTU_478  | Bacteria;Firmicutes;Negativicutes;Selenomonadales;Acidaminococcaceae;Phascolarctobacteri        | 0.02667975 eLC |
| OTU_1105 | Bacteria;Firmicutes;Negativicutes;Selenomonadales;Acidaminococcaceae;Phascolarctobacteri        | 0.00246358 eLC |
| OTU_469  | Bacteria;Bacteroidetes;Bacteroidia;Bacteroidales;Porphyromonadaceae;Parabacteroides             | 0.02667975 eLC |
| OTU_661  | Bacteria;Bacteroidetes;Bacteroidia;Bacteroidales;Porphyromonadaceae;Porphyromonas               | 0.04465502 eLC |
| OTU_314  | Bacteria;Bacteroidetes;Bacteroidia;Bacteroidales;Prevotellaceae;Prevotella                      | 0.02667975 eLC |
| OTU_319  | Bacteria;Bacteroidetes;Bacteroidia;Bacteroidales;Prevotellaceae;Prevotella                      | 0.00861157 eLC |
| OTU_1195 | Bacteria;Bacteroidetes;Bacteroidia;Bacteroidales;Prevotellaceae;Prevotella                      | 0.02667975 eLC |
| OTU_1234 | Bacteria;Bacteroidetes;Bacteroidia;Bacteroidales;Prevotellaceae;Prevotella                      | 0.02667975 eLC |
| OTU_1284 | Bacteria;Bacteroidetes;Bacteroidia;Bacteroidales;Prevotellaceae;Prevotella                      | 0.02667975 eLC |
| OTU_542  | Bacteria;Bacteroidetes;Bacteroidia;Bacteroidales;Rikenellaceae;Alistipes                        | 0.04465502 eLC |
| OTU_664  | Bacteria;Proteobacteria;Alphaproteobacteria;Caulobacteriales;Caulobacteraceae;Brevundimona      | 0.04910604 HCC |
| OTU_9    | Bacteria;Proteobacteria;Alphaproteobacteria;Rhizobiales;Hyphomicrobiaceae;Gemmiger              | 0.00170935 HCC |
| OTU_312  | Bacteria;Lentisphaerae;Lentisphaeria;Victivallales;Victivallaceae;Victivallis                   | 0.01685127 HCC |
| OTU_38   | Bacteria;Firmicutes;Erysipelotrichia;Erysipelotrichales;Erysipelotrichaceae;Clostridium XVIII   | 0.02409525 HCC |
| OTU_318  | Bacteria;Firmicutes;Erysipelotrichia;Erysipelotrichales;Erysipelotrichaceae;Clostridium XVIII   | 0.01685127 HCC |
| OTU_218  | Bacteria;Firmicutes;Erysipelotrichia;Erysipelotrichales;Erysipelotrichaceae;Holdemania          | 0.0089617 HCC  |
| OTU_65   | Bacteria;Firmicutes;Erysipelotrichia;Erysipelotrichales;Erysipelotrichaceae;Erysipelotrichaceae | 0.03257519 HCC |

|          |                                                                                                 |            |     |
|----------|-------------------------------------------------------------------------------------------------|------------|-----|
| OTU_336  | Bacteria;Firmicutes;Erysipelotrichia;Erysipelotrichales;Erysipelotrichaceae;Erysipelotrichaceae | 0.01438389 | HCC |
| OTU_417  | Bacteria;Firmicutes;Erysipelotrichia;Erysipelotrichales;Erysipelotrichaceae;Erysipelotrichaceae | 0.03430698 | HCC |
| OTU_252  | Bacteria;Firmicutes;Bacilli;Bacillales;Bacillales_Incertae Sedis XI;Gemella                     | 0.04547069 | HCC |
| OTU_245  | Bacteria;Firmicutes;Clostridia;Clostridiales                                                    | 0.04910604 | HCC |
| OTU_694  | Bacteria;Firmicutes;Clostridia;Clostridiales                                                    | 0.04910604 | HCC |
| OTU_776  | Bacteria;Firmicutes;Clostridia;Clostridiales;Lachnospiraceae;Lachnospiraceae_incertae_sedis     | 0.03961183 | HCC |
| OTU_1016 | Bacteria;Firmicutes;Clostridia;Clostridiales;Lachnospiraceae;Lachnospiraceae_incertae_sedis     | 0.03087501 | HCC |
| OTU_121  | Bacteria;Firmicutes;Clostridia;Clostridiales;Lachnospiraceae;Clostridium XIVb                   | 0.01276815 | HCC |
| OTU_309  | Bacteria;Firmicutes;Clostridia;Clostridiales;Lachnospiraceae;Clostridium XIVb                   | 0.02514615 | HCC |
| OTU_85   | Bacteria;Firmicutes;Clostridia;Clostridiales;Lachnospiraceae;Clostridium XIVa                   | 0.04120571 | HCC |
| OTU_356  | Bacteria;Firmicutes;Clostridia;Clostridiales;Lachnospiraceae;Clostridium XIVa                   | 0.04832089 | HCC |
| OTU_68   | Bacteria;Firmicutes;Clostridia;Clostridiales;Lachnospiraceae;Dorea                              | 0.0421489  | HCC |
| OTU_210  | Bacteria;Firmicutes;Clostridia;Clostridiales;Ruminococcaceae                                    | 0.02828326 | HCC |
| OTU_137  | Bacteria;Firmicutes;Clostridia;Clostridiales;Ruminococcaceae;Butyricoccus                       | 0.00683021 | HCC |
| OTU_235  | Bacteria;Firmicutes;Clostridia;Clostridiales;Ruminococcaceae;Clostridium IV                     | 0.01402968 | HCC |
| OTU_267  | Bacteria;Firmicutes;Negativicutes;Selenomonadales;Veillonellaceae;Dialister                     | 0.02403397 | HCC |
| OTU_372  | Bacteria;Firmicutes;Negativicutes;Selenomonadales;Acidaminococcaceae;Acidaminococcus            | 0.02228398 | HCC |
| OTU_249  | Bacteria;Bacteroidetes;Bacteroidia;Bacteroidales                                                | 0.02403397 | HCC |
| OTU_77   | Bacteria;Bacteroidetes;Bacteroidia;Bacteroidales;Porphyromonadaceae;Odoribacter                 | 0.0013196  | HCC |
| OTU_75   | Bacteria;Bacteroidetes;Bacteroidia;Bacteroidales;Porphyromonadaceae;Parabacteroides             | 0.00026072 | HCC |
| OTU_935  | Bacteria;Bacteroidetes;Bacteroidia;Bacteroidales;Porphyromonadaceae;Parabacteroides             | 0.02257968 | HCC |
| OTU_139  | Bacteria;Bacteroidetes;Bacteroidia;Bacteroidales;Porphyromonadaceae;Butyricimonas               | 0.03483778 | HCC |
| OTU_176  | Bacteria;Bacteroidetes;Bacteroidia;Bacteroidales;Porphyromonadaceae;Butyricimonas               | 0.04233631 | HCC |
| OTU_144  | Bacteria;Bacteroidetes;Bacteroidia;Bacteroidales;Prevotellaceae;Prevotella                      | 0.03430698 | HCC |
| OTU_71   | Bacteria;Bacteroidetes;Bacteroidia;Bacteroidales;Prevotellaceae;Paraprevotella                  | 0.00587507 | HCC |
| OTU_260  | Bacteria;Bacteroidetes;Bacteroidia;Bacteroidales;Prevotellaceae;Paraprevotella                  | 0.0284715  | HCC |
| OTU_26   | Bacteria;Bacteroidetes;Bacteroidia;Bacteroidales;Rikenellaceae;Alistipes                        | 0.01509538 | HCC |
| OTU_624  | Bacteria;Bacteroidetes;Bacteroidia;Bacteroidales;Rikenellaceae;Alistipes                        | 0.0099626  | HCC |
| OTU_3    | Bacteria;Bacteroidetes;Bacteroidia;Bacteroidales;Bacteroidaceae;Bacteroides                     | 0.00964664 | HCC |
| OTU_835  | Bacteria;Bacteroidetes;Bacteroidia;Bacteroidales;Bacteroidaceae;Bacteroides                     | 0.02093235 | HCC |
| OTU_404  | Bacteria;Bacteroidetes;Bacteroidia;Bacteroidales;Bacteroidaceae;Anaerorhabdus                   | 0.01677087 | HCC |
| OTU_451  | Bacteria;Actinobacteria;Actinobacteria;Actinomycetales;Micrococcaceae;Rothia                    | 0.01898803 | HCC |
| OTU_390  | Bacteria;Actinobacteria;Actinobacteria;Coriobacteriales;Coriobacteriaceae                       | 0.00576991 | HCC |
| OTU_87   | Bacteria;Actinobacteria;Actinobacteria;Coriobacteriales;Coriobacteriaceae;Collinsella           | 9.5212E-05 | HCC |
| OTU_244  | Bacteria;Actinobacteria;Actinobacteria;Coriobacteriales;Coriobacteriaceae;Eggerthella           | 3.786E-05  | HCC |
| OTU_357  | Bacteria;Actinobacteria;Actinobacteria;Coriobacteriales;Coriobacteriaceae;Adlercreutzia         | 0.04910604 | HCC |
| OTU_35   | Bacteria;Actinobacteria;Actinobacteria;Bifidobacteriales;Bifidobacteriaceae;Bifidobacterium     | 0.04904884 | HCC |
| OTU_209  | Bacteria;Actinobacteria;Actinobacteria;Bifidobacteriales;Bifidobacteriaceae;Bifidobacterium     | 0.04800755 | HCC |
| OTU_749  | Bacteria;Actinobacteria;Actinobacteria;Bifidobacteriales;Bifidobacteriaceae;Bifidobacterium     | 0.0490566  | HCC |

**Table S6. Different degree of phylum level (p value) in the discovery phase.**

| feature                          | mean(H) | median(H) | mean(C)  | median(C) | P(H-C)          | BH(H-C)  | Q(H-C)  | Enrich(H-C) |
|----------------------------------|---------|-----------|----------|-----------|-----------------|----------|---------|-------------|
| Bacteria;Proteobacteria          | 0.0741  | 0.0569    | 0.086677 | 0.0583    | 0.298061        | 0.859516 | 0.70933 | C           |
| Bacteria;TM7                     | 0.00011 | 0         | 0.000149 | 0         | 0.172596        | 0.911311 | 0.75208 | C           |
| UNCLASSIFIED_PHYLUM              | 0.01983 | 0.0065    | 0.01096  | 0.004     | 0.055035        | 0.201796 | 0.16654 | H           |
| Bacteria;Synergistetes           | 9.9E-05 | 0         | 3.87E-05 | 0         | <b>0.026022</b> | 0.191589 | 0.15811 | H           |
| Bacteria;Lentisphaerae           | 0.00035 | 0         | 0.000187 | 0         | 0.156179        | 0.318222 | 0.26262 | H           |
| Bacteria;Fusobacteria            | 0.03041 | 0         | 0.018123 | 0.0001    | 0.357245        | 0.859516 | 0.70933 | C           |
| Bacteria;Firmicutes              | 0.37155 | 0.3551    | 0.333484 | 0.3269    | 0.082439        | 0.226707 | 0.1871  | H           |
| Bacteria;Bacteroidetes           | 0.49481 | 0.5005    | 0.533096 | 0.5352    | 0.074196        | 0.81616  | 0.76447 | C           |
| Bacteria;Verrucomicrobia         | 0.00196 | 0         | 0.001484 | 0         | <b>0.034834</b> | 0.191589 | 0.15811 | H           |
| Bacteria;Actinobacteria          | 0.00676 | 0.0019    | 0.014852 | 0.0015    | 0.173576        | 0.318222 | 0.26262 | H           |
| Bacteria;Cyanobacteria/Chloroplæ | 2.1E-05 | 0         | 0.00002  | 0         | 0.492999        | 0.774713 | 0.63935 | H           |

  

| feature                          | mean(C) | median(C) | mean(ELC) | median(ELC) | P(C-ELC)       | BH(C-ELC) | Q(C-ELC) | Enrich(C-ELC) |
|----------------------------------|---------|-----------|-----------|-------------|----------------|-----------|----------|---------------|
| Bacteria;Proteobacteria          | 0.08668 | 0.0583    | 0.081685  | 0.042       | 0.093208       | 0.412024  | 0.39428  | C             |
| Bacteria;TM7                     | 0.00015 | 0         | 0.000173  | 0           | 0.452745       | 0.711456  | 0.68082  | C             |
| UNCLASSIFIED_PHYLUM              | 0.01096 | 0.004     | 0.009318  | 0.0021      | 0.149827       | 0.412024  | 0.39428  | C             |
| Bacteria;Synergistetes           | 3.9E-05 | 0         | 0.000035  | 0           | 0.260121       | 0.74296   | 0.71097  | ELC           |
| Bacteria;Lentisphaerae           | 0.00019 | 0         | 0.000035  | 0           | 0.145873       | 0.412024  | 0.39428  | C             |
| Bacteria;Fusobacteria            | 0.01812 | 0.0001    | 0.019165  | 0.0003      | 0.32191        | 0.74296   | 0.71097  | ELC           |
| Bacteria;Firmicutes              | 0.33348 | 0.3269    | 0.342773  | 0.29745     | 0.442802       | 0.711456  | 0.68082  | C             |
| Bacteria;Bacteroidetes           | 0.5331  | 0.5352    | 0.543698  | 0.56765     | 0.30164        | 0.74296   | 0.71097  | ELC           |
| Bacteria;Verrucomicrobia         | 0.00148 | 0         | 0.000688  | 0           | 0.326703       | 0.711456  | 0.68082  | C             |
| Bacteria;Actinobacteria          | 0.01485 | 0.0015    | 0.00236   | 0.00045     | <b>0.00491</b> | 0.054009  | 0.05168  | C             |
| Bacteria;Cyanobacteria/Chloroplæ | 0.00002 | 0         | 0.000055  | 0           | 0.374225       | 0.74296   | 0.71097  | ELC           |

**Table S7. Different degree of genera level (p value) between liver cirrhosis and early HCC**

| feature                                                                                     | mean(C | median(C | mean(ELC) | median(EL | P(C-ELC) | BH(C-EL | Q(C-ELC) | Enrich(C-ELC) |
|---------------------------------------------------------------------------------------------|--------|----------|-----------|-----------|----------|---------|----------|---------------|
| Bacteria;Actinobacteria;Actinobacteria;Coriobacteriales;Coriobacteriaceae;Eggerthella       | 0.0002 | 0        | 2.5E-06   | 0         | 3.34E-05 | 0.0029  | 0.00187  | C             |
| Bacteria;Actinobacteria;Actinobacteria;Coriobacteriales;Coriobacteriaceae;Collinsella       | 0.0024 | 0.0002   | 9.75E-05  | 0         | 8.89E-05 | 0.00387 | 0.00249  | C             |
| Bacteria;Bacteroidetes;Bacteroidia;Bacteroidales;Porphyromonadaceae;Odoribacter             | 0.0016 | 0.0009   | 0.000683  | 0         | 0.001384 | 0.04012 | 0.02586  | C             |
| Bacteria;Proteobacteria;Alphaproteobacteria;Rhizobiales;Hyphomicrobiaceae;Gemmiger          | 0.0126 | 0.005    | 0.006225  | 0.00235   | 0.002595 | 0.05644 | 0.03638  | C             |
| Bacteria;Firmicutes;Clostridia;Clostridiales;Lachnospiraceae;Dorea                          | 0.0016 | 0.0011   | 0.000905  | 0.0006    | 0.003973 | 0.06913 | 0.04455  | C             |
| Bacteria;Bacteroidetes;Bacteroidia;Bacteroidales;Porphyromonadaceae;Parabacteroides         | 0.0106 | 0.0077   | 0.006743  | 0.00365   | 0.006127 | 0.08884 | 0.05725  | C             |
| Bacteria;Firmicutes;Erysipelotrichia;Erysipelotrichales;Erysipelotrichaceae;Holdemania      | 0.0003 | 0.0001   | 7.25E-05  | 0         | 0.008267 | 0.10274 | 0.06621  | C             |
| Bacteria;Bacteroidetes;Bacteroidia;Bacteroidales;Prevotellaceae;Paraprevotella              | 0.0053 | 0        | 0.00125   | 0         | 0.011003 | 0.11966 | 0.07711  | C             |
| Bacteria;Firmicutes;Erysipelotrichia;Erysipelotrichales;Erysipelotrichaceae;Clostridium_X   | 0.0038 | 0.0013   | 0.001623  | 0.0005    | 0.017021 | 0.16453 | 0.10603  | C             |
| Bacteria;Firmicutes;Clostridia;Clostridiales;Ruminococcaceae;Butyricoccus                   | 0.0017 | 0.0011   | 0.001298  | 0.0005    | 0.02122  | 0.17433 | 0.11235  | C             |
| Bacteria;Firmicutes;Clostridia;Clostridiales;Lachnospiraceae;Lachnospira                    | 9E-06  | 0        | 0         | 0         | 0.023962 | 0.17433 | 0.11235  | C             |
| Bacteria;Firmicutes;Erysipelotrichia;Erysipelotrichales;Erysipelotrichaceae;Erysipelotricha | 0.0028 | 0.0006   | 0.001538  | 0.0002    | 0.024046 | 0.17433 | 0.11235  | C             |
| Bacteria;Firmicutes;Negativicutes;Selenomonadales;Acidaminococcaceae;Acidaminococcu         | 0.0003 | 0        | 0.000045  | 0         | 0.035414 | 0.22364 | 0.14412  | C             |
| Bacteria;Firmicutes;Clostridia;Clostridiales;Lachnospiraceae;Clostridium_XIVb               | 0.0026 | 0.0016   | 0.001485  | 0.0008    | 0.035988 | 0.22364 | 0.14412  | C             |
| Bacteria;Bacteroidetes;Bacteroidia;Bacteroidales;Porphyromonadaceae;Porphyromonas           | 4E-06  | 0        | 0.000035  | 0         | 0.041685 | 0.95949 | 0.61834  | ELC           |
| Bacteria;Synergistetes;Synergistia;Synergistales;Synergistaceae;Pyramidobacter              | 3E-05  | 0        | 0.00002   | 0         | 0.04678  | 0.95949 | 0.61834  | ELC           |
| Bacteria;Firmicutes;Bacilli;Bacillales;Bacillales_Incertae_Sedis_XI;Gemella                 | 2E-05  | 0        | 0.000025  | 0         | 0.048387 | 0.28065 | 0.18086  | C             |
| Bacteria;Actinobacteria;Actinobacteria;Actinomycetales;Micrococcaceae;Rothia                | 5E-05  | 0        | 0.000005  | 0         | 0.056211 | 0.30565 | 0.19698  | C             |
| Bacteria;Proteobacteria;Epsilonproteobacteria;Campylobacteriales;Campylobacteraceae;Ca      | 7E-05  | 0        | 5.75E-05  | 0         | 0.066473 | 0.95662 | 0.61649  | ELC           |
| Bacteria;Bacteroidetes;Bacteroidia;Bacteroidales;Porphyromonadaceae;Barnesiella             | 0.0021 | 0.0001   | 0.001343  | 0         | 0.070232 | 0.35942 | 0.23163  | C             |
| Bacteria;Firmicutes;Clostridia;Clostridiales;Ruminococcaceae;Faecalibacterium               | 0.0393 | 0.029    | 0.053668  | 0.039     | 0.074281 | 0.95662 | 0.61649  | ELC           |
| Bacteria;Proteobacteria;Gammaproteobacteria;Enterobacteriales;Enterobacteriaceae;Enteroc    | 0.0001 | 0        | 0.002545  | 0         | 0.079628 | 0.95662 | 0.61649  | ELC           |
| Bacteria;Lentisphaerae;Lentisphaeria;Victivallales;Victivallaceae;Victivallis               | 0.0002 | 0        | 2.75E-05  | 0         | 0.080057 | 0.36893 | 0.23776  | C             |
| Bacteria;Firmicutes;Clostridia;Clostridiales;Peptococcaceae_1;Peptococcus                   | 5E-05  | 0        | 0.000005  | 0         | 0.083074 | 0.36893 | 0.23776  | C             |
| Bacteria;Proteobacteria;Gammaproteobacteria;Pseudomonadales;Moraxellaceae;Acinetoba         | 1E-05  | 0        | 2.5E-06   | 0         | 0.086051 | 0.36893 | 0.23776  | C             |
| Bacteria;Proteobacteria;Deltaproteobacteria;Desulfovibrionales;Desulfovibrionaceae;Bilop    | 0.0028 | 0.0005   | 0.00107   | 0.0005    | 0.089053 | 0.36893 | 0.23776  | C             |
| Bacteria;Firmicutes;Negativicutes;Selenomonadales;Veillonellaceae;Megamonas                 | 0.0164 | 0        | 0.023975  | 0.0001    | 0.094441 | 0.95662 | 0.61649  | ELC           |
| Bacteria;Firmicutes;Negativicutes;Selenomonadales;Veillonellaceae;Veillonella               | 0.0046 | 0.0001   | 0.009568  | 0.00045   | 0.097059 | 0.95662 | 0.61649  | ELC           |
| Bacteria;Firmicutes;Erysipelotrichia;Erysipelotrichales;Erysipelotrichaceae;Solobacterium   | 3E-05  | 0        | 0.00001   | 0         | 0.097587 | 0.38591 | 0.2487   | C             |
| Bacteria;Firmicutes;Negativicutes;Selenomonadales;Veillonellaceae;Megasphaera               | 0.0064 | 0        | 0.001008  | 0         | 0.107651 | 0.95662 | 0.61649  | ELC           |
| Bacteria;Firmicutes;Erysipelotrichia;Erysipelotrichales;Erysipelotrichaceae;Catenibacteriu  | 0.0003 | 0        | 0.00047   | 0         | 0.110246 | 0.95662 | 0.61649  | ELC           |
| Bacteria;Firmicutes;Clostridia;Clostridiales;Ruminococcaceae;Sporobacter                    | 9E-06  | 0        | 2.5E-06   | 0         | 0.121096 | 0.44678 | 0.28793  | C             |
| Bacteria;Bacteroidetes;Bacteroidia;Bacteroidales;Prevotellaceae;Hallella                    | 1E-05  | 0        | 0.005183  | 0         | 0.131445 | 0.44678 | 0.28793  | C             |
| Bacteria;Firmicutes;Clostridia;Clostridiales;Ruminococcaceae;Clostridium_IV                 | 0.0023 | 0.0004   | 0.001373  | 0.0002    | 0.138559 | 0.44678 | 0.28793  | C             |
| Bacteria;Firmicutes;Clostridia;Clostridiales;Lachnospiraceae;Oribacterium                   | 1E-05  | 0        | 0.000005  | 0         | 0.14916  | 0.44678 | 0.28793  | C             |
| Bacteria;Firmicutes;Clostridia;Clostridiales;Ruminococcaceae;Pseudoflavonifractor           | 1E-05  | 0        | 0.000005  | 0         | 0.14916  | 0.44678 | 0.28793  | C             |

|                                                                                            |        |        |          |         |          |         |         |     |
|--------------------------------------------------------------------------------------------|--------|--------|----------|---------|----------|---------|---------|-----|
| Bacteria;Firmicutes;Clostridia;Clostridiales;Ruminococcaceae;Flavonifractor                | 0.0031 | 0.001  | 0.00267  | 0.00065 | 0.150762 | 0.44678 | 0.28793 | C   |
| Bacteria;Proteobacteria;Gammaproteobacteria;Enterobacteriales;Enterobacteriaceae;Esche     | 0.0271 | 0.0022 | 0.034735 | 0.0016  | 0.155186 | 0.44678 | 0.28793 | C   |
| Bacteria;Bacteroidetes;Bacteroidia;Bacteroidales;Bacteroidaceae;Bacteroides                | 0.2872 | 0.2857 | 0.256583 | 0.22205 | 0.168501 | 0.44678 | 0.28793 | C   |
| Bacteria;Firmicutes;Clostridia;Clostridiales;Eubacteriaceae;Eubacterium                    | 8E-06  | 0      | 2.5E-06  | 0       | 0.170388 | 0.44678 | 0.28793 | C   |
| Bacteria;Bacteroidetes;Bacteroidia;Bacteroidales;Porphyromonadaceae;Butyricimonas          | 0.0019 | 0.0009 | 0.00195  | 0.00025 | 0.172658 | 0.44678 | 0.28793 | C   |
| Bacteria;Bacteroidetes;Bacteroidia;Bacteroidales;Rikenellaceae;Alistipes                   | 0.0117 | 0.0052 | 0.011165 | 0.00215 | 0.176715 | 0.44678 | 0.28793 | C   |
| Bacteria;Firmicutes;Clostridia;Clostridiales;Ruminococcaceae;Anaerotruncus                 | 4E-05  | 0      | 0.00003  | 0       | 0.179836 | 0.44678 | 0.28793 | C   |
| Bacteria;Firmicutes;Bacilli;Lactobacillales;Lactobacillaceae;Lactobacillus                 | 0.0003 | 0      | 0.000393 | 0       | 0.180649 | 0.44678 | 0.28793 | C   |
| Bacteria;Proteobacteria;Betaproteobacteria;Burkholderiales;Sutterellaceae;Parasutterella   | 0.0151 | 0.0025 | 0.010115 | 0.00065 | 0.184876 | 0.44678 | 0.28793 | C   |
| Bacteria;Firmicutes;Clostridia;Clostridiales;Ruminococcaceae;Anaerofilum                   | 1E-05  | 0      | 0.000005 | 0       | 0.204258 | 0.48028 | 0.30952 | C   |
| Bacteria;Proteobacteria;Gammaproteobacteria;Enterobacteriales;Enterobacteriaceae;Raoult    | 4E-05  | 0      | 3.75E-05 | 0       | 0.211843 | 0.88399 | 0.56969 | ELC |
| Bacteria;Proteobacteria;Gammaproteobacteria;Enterobacteriales;Enterobacteriaceae;Crono     | 2E-05  | 0      | 0.00001  | 0       | 0.225327 | 0.88042 | 0.56738 | ELC |
| Bacteria;Firmicutes;Erysipelotrichia;Erysipelotrichales;Erysipelotrichaceae;Turicibacter   | 0.0003 | 0      | 0.000103 | 0       | 0.226498 | 0.51856 | 0.33419 | C   |
| Bacteria;Proteobacteria;Gammaproteobacteria;Pseudomonadales;Pseudomonadaceae;Pseu          | 5E-06  | 0      | 2.5E-06  | 0       | 0.242521 | 0.54101 | 0.34865 | C   |
| Bacteria;Fusobacteria;Fusobacteria;Fusobacteriales;Fusobacteriaceae;Clostridium_XIX        | 3E-05  | 0      | 7.5E-06  | 0       | 0.257071 | 0.55913 | 0.36033 | C   |
| Bacteria;Proteobacteria;Gammaproteobacteria;Enterobacteriales;Enterobacteriaceae;Proteu    | 5E-05  | 0      | 0.000278 | 0       | 0.26626  | 0.84466 | 0.54434 | ELC |
| Bacteria;Proteobacteria;Gammaproteobacteria;Enterobacteriales;Enterobacteriaceae;Klebsi    | 0.0058 | 0.0001 | 0.005495 | 0.00005 | 0.27079  | 0.56476 | 0.36396 | C   |
| Bacteria;Firmicutes;Negativicutes;Selenomonadales;Acidaminococcaceae;Phascolarctobac       | 0.0237 | 0.0038 | 0.018725 | 0.0085  | 0.271173 | 0.84466 | 0.54434 | ELC |
| Bacteria;Bacteroidetes;Bacteroidia;Bacteroidales;Prevotellaceae;Prevotella                 | 0.2007 | 0.0017 | 0.239695 | 0.0621  | 0.27121  | 0.84466 | 0.54434 | ELC |
| Bacteria;Actinobacteria;Actinobacteria;Actinomycetales;Actinomycetaceae;Actinomyces        | 6E-05  | 0      | 3.75E-05 | 0       | 0.276552 | 0.56476 | 0.36396 | C   |
| Bacteria;Firmicutes;Clostridia;Clostridiales;Ruminococcaceae;Ruminococcus                  | 0.0076 | 0.0014 | 0.00596  | 0.00115 | 0.279132 | 0.56476 | 0.36396 | C   |
| Bacteria;Firmicutes;Negativicutes;Selenomonadales;Veillonellaceae;Dialister                | 0.0068 | 0      | 0.00494  | 0       | 0.286054 | 0.84466 | 0.54434 | ELC |
| Bacteria;Proteobacteria;Gammaproteobacteria;Enterobacteriales;Enterobacteriaceae;Citrob    | 0.0001 | 0      | 0.00011  | 0       | 0.293715 | 0.84466 | 0.54434 | ELC |
| Bacteria;Firmicutes;Negativicutes;Selenomonadales;Veillonellaceae;Allisonella              | 0.0002 | 0      | 0.000368 | 0       | 0.311076 | 0.84466 | 0.54434 | ELC |
| Bacteria;Firmicutes;Clostridia;Clostridiales;Lachnospiraceae;Lachnospiracea_incertae_sed   | 0.0419 | 0.0228 | 0.04515  | 0.02225 | 0.314028 | 0.84466 | 0.54434 | ELC |
| Bacteria;Verrucomicrobia;Verrucomicrobiae;Verrucomicrobiales;Verrucomicrobiaceae;Ak        | 0.0015 | 0      | 0.00064  | 0       | 0.314401 | 0.62166 | 0.40063 | C   |
| Bacteria;Firmicutes;Clostridia;Clostridiales;Lachnospiraceae;Anaerostipes                  | 0.001  | 0.0002 | 0.000378 | 0.0002  | 0.32345  | 0.62534 | 0.403   | C   |
| Bacteria;Fusobacteria;Fusobacteria;Fusobacteriales;Fusobacteriaceae;Fusobacterium          | 0.013  | 0.0001 | 0.01824  | 0.0001  | 0.325321 | 0.84466 | 0.54434 | ELC |
| Bacteria;Firmicutes;Clostridia;Clostridiales;Peptostreptococcaceae;Clostridium_XI          | 0.0032 | 0.0006 | 0.00598  | 0.00055 | 0.337541 | 0.63771 | 0.41097 | C   |
| Bacteria;Firmicutes;Clostridia;Clostridiales;Lachnospiraceae;Roseburia                     | 0.041  | 0.0303 | 0.036688 | 0.02835 | 0.352408 | 0.63771 | 0.41097 | C   |
| Bacteria;Proteobacteria;Deltaproteobacteria;Desulfovibrionales;Desulfovibrionaceae;Desul   | 0.001  | 0      | 0.000363 | 0       | 0.354059 | 0.63771 | 0.41097 | C   |
| Bacteria;Firmicutes;Clostridia;Clostridiales;Lachnospiraceae;Coprococcus                   | 0.0036 | 0.001  | 0.0031   | 0.0009  | 0.35917  | 0.63771 | 0.41097 | C   |
| Bacteria;Firmicutes;Clostridia;Clostridiales;Lachnospiraceae;Blautia                       | 0.0044 | 0.0028 | 0.004055 | 0.00265 | 0.373328 | 0.64959 | 0.41863 | C   |
| Bacteria;Cyanobacteria/Chloroplast;Chloroplast;Chloroplast;Chloroplast;Streptophyta        | 2E-05  | 0      | 0.000055 | 0       | 0.374225 | 0.8058  | 0.51929 | ELC |
| UNCLASSIFIED_GENUS                                                                         | 0.1255 | 0.1025 | 0.129525 | 0.09745 | 0.387897 | 0.66171 | 0.42644 | C   |
| Bacteria;Firmicutes;Clostridia;Clostridiales;Lachnospiraceae;Clostridium_XIVa              | 0.0071 | 0.0059 | 0.011658 | 0.00445 | 0.402585 | 0.7787  | 0.50183 | ELC |
| Bacteria;Proteobacteria;Gammaproteobacteria;Pasteurellales;Pasteurellaceae;Haemophilus     | 0.0029 | 0.0004 | 0.003243 | 0.00065 | 0.404229 | 0.7787  | 0.50183 | ELC |
| Bacteria;Actinobacteria;Actinobacteria;Bifidobacteriales;Bifidobacteriaceae;Bifidobacteriu | 0.0118 | 0.0002 | 0.00218  | 0.0003  | 0.414068 | 0.67621 | 0.43578 | C   |

|                                                                                            |        |        |          |        |          |         |         |     |
|--------------------------------------------------------------------------------------------|--------|--------|----------|--------|----------|---------|---------|-----|
| Bacteria;Firmicutes;Bacilli;Lactobacillales;Streptococcaceae;Streptococcus                 | 0.006  | 0.0004 | 0.005805 | 0.0004 | 0.417035 | 0.7787  | 0.50183 | ELC |
| Bacteria;Proteobacteria;Betaproteobacteria;Burkholderiales;Sutterellaceae;Sutterella       | 0.0097 | 0      | 0.007683 | 0      | 0.417351 | 0.67621 | 0.43578 | C   |
| Bacteria;Proteobacteria;Betaproteobacteria;Burkholderiales;Comamonadaceae;Comamonas        | 9E-06  | 0      | 0.000005 | 0      | 0.417712 | 0.7787  | 0.50183 | ELC |
| Bacteria;Proteobacteria;Gammaproteobacteria;Pasteurellales;Pasteurellaceae;Aggregatibacter | 5E-05  | 0      | 5.25E-05 | 0      | 0.430751 | 0.67621 | 0.43578 | C   |
| Bacteria;Firmicutes;Clostridia;Clostridiales;Ruminococcaceae;Oscillibacter                 | 0.0044 | 0.0027 | 0.003948 | 0.0024 | 0.433357 | 0.67621 | 0.43578 | C   |
| Bacteria;Firmicutes;Bacilli;Lactobacillales;Carnobacteriaceae;Granulicatella               | 4E-05  | 0      | 4.25E-05 | 0      | 0.435922 | 0.67621 | 0.43578 | C   |
| Bacteria;Firmicutes;Clostridia;Clostridiales;Clostridiaceae_1;Clostridium_sensu_stricto    | 0.0027 | 0.0002 | 0.004178 | 0.0002 | 0.443034 | 0.67621 | 0.43578 | C   |
| Bacteria;Firmicutes;Clostridia;Clostridiales;Lachnospiraceae;Howardella                    | 3E-05  | 0      | 0.000055 | 0      | 0.451909 | 0.76318 | 0.49183 | ELC |
| Bacteria;TM7;TM7_genera_incertae_sedis;TM7_genera_incertae_sedis;TM7_genera_incertae_sedis | 0.0001 | 0      | 0.000173 | 0      | 0.452745 | 0.67911 | 0.43765 | C   |
| Bacteria;Actinobacteria;Actinobacteria;Coriobacteriales;Coriobacteriaceae;Gordonibacter    | 2E-05  | 0      | 0.000005 | 0      | 0.460545 | 0.67911 | 0.43765 | C   |
| Bacteria;Firmicutes;Bacilli;Lactobacillales;Enterococcaceae;Enterococcus                   | 2E-05  | 0      | 2.25E-05 | 0      | 0.474763 | 0.74345 | 0.47912 | ELC |
| Bacteria;Firmicutes;Erysipelotrichia;Erysipelotrichales;Erysipelotrichaceae;Coprobacillus  | 5E-05  | 0      | 0.000465 | 0      | 0.49113  | 0.70594 | 0.45494 | C   |
| Bacteria;Synergistetes;Synergistia;Synergistales;Synergistaceae;Cloacibacillus             | 8E-06  | 0      | 0.000015 | 0      | 0.494967 | 0.70594 | 0.45494 | C   |



**Table S8. Different degree of genera level (p value) between healthy controls and early HCC cohort**

| feature                                                                                   | mean(H)  | median(H) | mean(C) | median((P(H-C) | BH(H-C)  | Q(H-C) | Enrich(H-C) |
|-------------------------------------------------------------------------------------------|----------|-----------|---------|----------------|----------|--------|-------------|
| Bacteria;Firmicutes;Bacilli;Lactobacillales;Lactobacillaceae;Lactobacillus                | 7.87E-05 | 0         | 0.0003  | 0              | 7.41E-05 | 0.0064 | 0.006 C     |
| Bacteria;Firmicutes;Clostridia;Clostridiales;Ruminococcaceae;Butyricoccus                 | 0.003213 | 0.002     | 0.0017  | 0.0011         | 0.000173 | 0.015  | 0.015 H     |
| Bacteria;Firmicutes;Clostridia;Clostridiales;Lachnospiraceae;Anaerostipes                 | 0.002243 | 0.0004    | 0.001   | 0.0002         | 0.000628 | 0.0273 | 0.027 H     |
| Bacteria;Proteobacteria;Gammaproteobacteria;Enterobacteriales;Enterobacteriaceae;Klebsie  | 0.000479 | 0         | 0.0058  | 0.0001         | 0.001062 | 0.0462 | 0.046 C     |
| Bacteria;Firmicutes;Negativicutes;Selenomonadales;Veillonellaceae;Megasphaera             | 0.001745 | 0         | 0.0064  | 0              | 0.001703 | 0.0494 | 0.049 C     |
| Bacteria;Proteobacteria;Gammaproteobacteria;Pasteurellales;Pasteurellaceae;Aggregatibacte | 1.73E-05 | 0         | 5E-05   | 0              | 0.005676 | 0.1235 | 0.123 C     |
| Bacteria;Proteobacteria;Gammaproteobacteria;Pseudomonadales;Pseudomonadaceae;Pseud        | 2.13E-05 | 0         | 5E-06   | 0              | 0.009835 | 0.2113 | 0.211 H     |
| Bacteria;Firmicutes;Clostridia;Clostridiales;Ruminococcaceae;Clostridium_IV               | 0.003293 | 0.0009    | 0.0023  | 0.0004         | 0.010617 | 0.2113 | 0.211 H     |
| Bacteria;Bacteroidetes;Bacteroidia;Bacteroidales;Rikenellaceae;Alistipes                  | 0.019992 | 0.0149    | 0.0117  | 0.0052         | 0.0139   | 0.2113 | 0.211 H     |
| Bacteria;Firmicutes;Clostridia;Clostridiales;Ruminococcaceae;Ruminococcus                 | 0.011277 | 0.0034    | 0.0076  | 0.0014         | 0.017437 | 0.2113 | 0.211 H     |
| Bacteria;Proteobacteria;Deltaproteobacteria;Desulfovibrionales;Desulfovibrionaceae;Biloph | 0.003371 | 0.0016    | 0.0028  | 0.0005         | 0.018249 | 0.2113 | 0.211 H     |
| Bacteria;Firmicutes;Clostridia;Clostridiales;Lachnospiraceae;Coproccoccus                 | 0.005024 | 0.0022    | 0.0036  | 0.001          | 0.019429 | 0.2113 | 0.211 H     |
| Bacteria;Verrucomicrobia;Verrucomicrobiae;Verrucomicrobiales;Verrucomicrobiaceae;Akk      | 0.001937 | 0         | 0.0015  | 0              | 0.02408  | 0.2179 | 0.218 H     |
| Bacteria;Firmicutes;Negativicutes;Selenomonadales;Acidaminococcaceae;Acidaminococcus      | 0.000232 | 0         | 0.0003  | 0              | 0.024125 | 0.3814 | 0.381 C     |
| Bacteria;Firmicutes;Negativicutes;Selenomonadales;Veillonellaceae;Allisonella             | 0.000345 | 0         | 0.0002  | 0              | 0.025041 | 0.2179 | 0.218 H     |
| Bacteria;Actinobacteria;Actinobacteria;Actinomycetales;Micrococcaceae;Rothia              | 6.67E-06 | 0         | 5E-05   | 0              | 0.027326 | 0.3814 | 0.381 C     |
| Bacteria;Firmicutes;Clostridia;Clostridiales;Eubacteriaceae;Eubacterium                   | 3.73E-05 | 0         | 8E-06   | 0              | 0.029907 | 0.2283 | 0.228 H     |
| Bacteria;Proteobacteria;Gammaproteobacteria;Pasteurellales;Pasteurellaceae;Haemophilus    | 0.001883 | 0.0002    | 0.0029  | 0.0004         | 0.031927 | 0.3814 | 0.381 C     |
| Bacteria;Actinobacteria;Actinobacteria;Coriobacteriales;Coriobacteriaceae;Gordonibacter   | 0.00002  | 0         | 2E-05   | 0              | 0.033502 | 0.2283 | 0.228 H     |
| Bacteria;Firmicutes;Negativicutes;Selenomonadales;Acidaminococcaceae;Phascolarctobacte    | 0.023148 | 0.0081    | 0.0237  | 0.0038         | 0.034114 | 0.2283 | 0.228 H     |
| Bacteria;Firmicutes;Clostridia;Clostridiales;Peptococcaceae_1;Peptococcus                 | 0.000004 | 0         | 5E-05   | 0              | 0.039773 | 0.3814 | 0.381 C     |
| Bacteria;Firmicutes;Clostridia;Clostridiales;Clostridiaceae_1;Clostridium_sensu_stricto   | 0.002244 | 0.0001    | 0.0027  | 0.0002         | 0.040554 | 0.3814 | 0.381 C     |
| Bacteria;Firmicutes;Erysipelotrichia;Erysipelotrichales;Erysipelotrichaceae;Coproccillus  | 0.000169 | 0         | 5E-05   | 0              | 0.042438 | 0.2542 | 0.254 H     |
| Bacteria;Firmicutes;Clostridia;Clostridiales;Ruminococcaceae;Oscillibacter                | 0.005816 | 0.0046    | 0.0044  | 0.0027         | 0.043821 | 0.2542 | 0.254 H     |
| Bacteria;Firmicutes;Bacilli;Lactobacillales;Enterococcaceae;Enterococcus                  | 6.67E-06 | 0         | 2E-05   | 0              | 0.043843 | 0.3814 | 0.381 C     |
| Bacteria;Firmicutes;Clostridia;Clostridiales;Ruminococcaceae;Anaerotruncus                | 0.00008  | 0         | 4E-05   | 0              | 0.047399 | 0.2577 | 0.258 H     |
| Bacteria;Firmicutes;Clostridia;Clostridiales;Lachnospiraceae;Clostridium_XIVb             | 0.003503 | 0.0019    | 0.0026  | 0.0016         | 0.050556 | 0.2587 | 0.259 H     |
| Bacteria;Bacteroidetes;Bacteroidia;Bacteroidales;Porphyromonadaceae;Butyricimonas         | 0.003531 | 0.0013    | 0.0019  | 0.0009         | 0.065688 | 0.3151 | 0.315 H     |
| Bacteria;Bacteroidetes;Bacteroidia;Bacteroidales;Prevotellaceae;Prevotella                | 0.157673 | 0.0005    | 0.2007  | 0.0017         | 0.06854  | 0.4788 | 0.479 C     |
| Bacteria;Firmicutes;Clostridia;Clostridiales;Ruminococcaceae;Faecalibacterium             | 0.056047 | 0.0372    | 0.0393  | 0.029          | 0.068805 | 0.3151 | 0.315 H     |
| Bacteria;Firmicutes;Negativicutes;Selenomonadales;Veillonellaceae;Veillonella             | 0.002313 | 0.0001    | 0.0046  | 0.0001         | 0.069745 | 0.4788 | 0.479 C     |

|                                                                                             |          |        |        |        |          |        |       |   |
|---------------------------------------------------------------------------------------------|----------|--------|--------|--------|----------|--------|-------|---|
| Bacteria;Firmicutes;Bacilli;Lactobacillales;Carnobacteriaceae;Granulicatella                | 0.000024 | 0      | 4E-05  | 0      | 0.07155  | 0.4788 | 0.479 | C |
| UNCLASSIFIED_GENUS                                                                          | 0.159587 | 0.1089 | 0.1255 | 0.1025 | 0.078509 | 0.3283 | 0.328 | H |
| Bacteria;Proteobacteria;Deltaproteobacteria;Desulfovibrionales;Desulfovibrionaceae;Desulf   | 0.0013   | 0      | 0.001  | 0      | 0.079248 | 0.3283 | 0.328 | H |
| Bacteria;Firmicutes;Clostridia;Clostridiales;Lachnospiraceae;Clostridium_XIVa               | 0.008797 | 0.0043 | 0.0071 | 0.0059 | 0.080141 | 0.498  | 0.498 | C |
| Bacteria;Firmicutes;Erysipelotrichia;Erysipelotrichales;Erysipelotrichaceae;Turicibacter    | 0.000104 | 0      | 0.0003 | 0      | 0.092616 | 0.5308 | 0.531 | C |
| Bacteria;Firmicutes;Clostridia;Clostridiales;Lachnospiraceae;Howardella                     | 0.000016 | 0      | 3E-05  | 0      | 0.097614 | 0.5308 | 0.531 | C |
| Bacteria;Firmicutes;Erysipelotrichia;Erysipelotrichales;Erysipelotrichaceae;Holdmania       | 0.000296 | 0.0001 | 0.0003 | 0.0001 | 0.099328 | 0.3886 | 0.389 | H |
| Bacteria;Firmicutes;Clostridia;Clostridiales;Ruminococcaceae;Flavonifractor                 | 0.004015 | 0.0016 | 0.0031 | 0.001  | 0.102737 | 0.3886 | 0.389 | H |
| Bacteria;Synergistetes;Synergistia;Synergistales;Synergistaceae;Pyramidobacter              | 0.000028 | 0      | 3E-05  | 0      | 0.120847 | 0.4297 | 0.43  | H |
| Bacteria;Firmicutes;Clostridia;Clostridiales;Lachnospiraceae;Blautia                        | 0.005171 | 0.0029 | 0.0044 | 0.0028 | 0.127324 | 0.4297 | 0.43  | H |
| Bacteria;Synergistetes;Synergistia;Synergistales;Synergistaceae;Cloacibacillus              | 0.000068 | 0      | 8E-06  | 0      | 0.12841  | 0.4297 | 0.43  | H |
| Bacteria;Firmicutes;Negativicutes;Selenomonadales;Veillonellaceae;Dialister                 | 0.011089 | 0      | 0.0068 | 0      | 0.143984 | 0.4387 | 0.439 | H |
| Bacteria;Firmicutes;Clostridia;Clostridiales;Lachnospiraceae;Dorea                          | 0.002439 | 0.0011 | 0.0016 | 0.0011 | 0.146946 | 0.4387 | 0.439 | H |
| Bacteria;Proteobacteria;Betaproteobacteria;Burkholderiales;Comamonadaceae;Comamonas         | 0.000032 | 0      | 9E-06  | 0      | 0.149981 | 0.4387 | 0.439 | H |
| Bacteria;Lentisphaerae;Lentisphaeria;Victivallales;Victivallaceae;Victivallis               | 0.000313 | 0      | 0.0002 | 0      | 0.151276 | 0.4387 | 0.439 | H |
| Bacteria;Bacteroidetes;Bacteroidia;Bacteroidales;Prevotellaceae;Hallella                    | 5.33E-06 | 0      | 1E-05  | 0      | 0.152087 | 0.6823 | 0.682 | C |
| Bacteria;Firmicutes;Bacilli;Bacillales;Bacillales_Incertae_Sedis_XI;Gemella                 | 0.000012 | 0      | 2E-05  | 0      | 0.154003 | 0.6823 | 0.682 | C |
| Bacteria;Firmicutes;Clostridia;Clostridiales;Ruminococcaceae;Sporobacter                    | 5.33E-06 | 0      | 9E-06  | 0      | 0.156399 | 0.6823 | 0.682 | C |
| Bacteria;Firmicutes;Negativicutes;Selenomonadales;Veillonellaceae;Megamonas                 | 0.004543 | 0      | 0.0164 | 0      | 0.156843 | 0.6823 | 0.682 | C |
| Bacteria;TM7;TM7_genera_incertae_sedis;TM7_genera_incertae_sedis;TM7_genera_inceri          | 0.000105 | 0      | 0.0001 | 0      | 0.172596 | 0.6852 | 0.685 | C |
| Bacteria;Proteobacteria;Gammaproteobacteria;Pseudomonadales;Moraxellaceae;Acinetobac        | 6.67E-06 | 0      | 1E-05  | 0      | 0.178927 | 0.6852 | 0.685 | C |
| Bacteria;Firmicutes;Clostridia;Clostridiales;Lachnospiraceae;Lachnospira                    | 6.67E-06 | 0      | 9E-06  | 0      | 0.183265 | 0.6852 | 0.685 | C |
| Bacteria;Firmicutes;Erysipelotrichia;Erysipelotrichales;Erysipelotrichaceae;Catenibacterium | 0.000237 | 0      | 0.0003 | 0      | 0.18901  | 0.6852 | 0.685 | C |
| Bacteria;Fusobacteria;Fusobacteria;Fusobacteriales;Fusobacteriaceae;Clostridium_XIX         | 8.27E-05 | 0      | 3E-05  | 0      | 0.201134 | 0.5645 | 0.564 | H |
| Bacteria;Proteobacteria;Alphaproteobacteria;Rhizobiales;Hyphomicrobiaceae;Gemmiger          | 0.015733 | 0.0081 | 0.0126 | 0.005  | 0.217514 | 0.5882 | 0.588 | H |
| Bacteria;Firmicutes;Bacilli;Lactobacillales;Streptococcaceae;Streptococcus                  | 0.001448 | 0.0003 | 0.006  | 0.0004 | 0.219952 | 0.7651 | 0.765 | C |
| Bacteria;Actinobacteria;Actinobacteria;Actinomycetales;Actinomycetaceae;Actinomyces         | 5.73E-05 | 0      | 6E-05  | 0      | 0.227448 | 0.5882 | 0.588 | H |
| Bacteria;Proteobacteria;Gammaproteobacteria;Enterobacteriales;Enterobacteriaceae;Escheri    | 0.011957 | 0.0023 | 0.0271 | 0.0022 | 0.228654 | 0.7651 | 0.765 | C |
| Bacteria;Proteobacteria;Gammaproteobacteria;Enterobacteriales;Enterobacteriaceae;Raoulte    | 1.47E-05 | 0      | 4E-05  | 0      | 0.234529 | 0.5882 | 0.588 | H |
| Bacteria;Proteobacteria;Gammaproteobacteria;Enterobacteriales;Enterobacteriaceae;Cronob     | 0.00002  | 0      | 2E-05  | 0      | 0.240504 | 0.5882 | 0.588 | H |
| Bacteria;Firmicutes;Clostridia;Clostridiales;Lachnospiraceae;Lachnospiracea_incertae_sedis  | 0.039461 | 0.0279 | 0.0419 | 0.0228 | 0.243409 | 0.5882 | 0.588 | H |
| Bacteria;Firmicutes;Erysipelotrichia;Erysipelotrichales;Erysipelotrichaceae;Solobacterium   | 2.27E-05 | 0      | 3E-05  | 0      | 0.243424 | 0.7844 | 0.784 | C |
| Bacteria;Bacteroidetes;Bacteroidia;Bacteroidales;Porphyromonadaceae;Odoribacter             | 0.002291 | 0.0008 | 0.0016 | 0.0009 | 0.256252 | 0.5933 | 0.593 | H |
| Bacteria;Actinobacteria;Actinobacteria;Bifidobacteriales;Bifidobacteriaceae;Bifidobacteriur | 0.004941 | 0.0007 | 0.0118 | 0.0002 | 0.259152 | 0.5933 | 0.593 | H |

|                                                                                              |          |        |        |        |          |        |       |   |
|----------------------------------------------------------------------------------------------|----------|--------|--------|--------|----------|--------|-------|---|
| Bacteria;Fusobacteria;Fusobacteria;Fusobacteriales;Fusobacteriaceae;Fusobacterium            | 0.024455 | 0      | 0.013  | 0.0001 | 0.276171 | 0.846  | 0.846 | C |
| Bacteria;Proteobacteria;Betaproteobacteria;Burkholderiales;Sutterellaceae;Sutterella         | 0.012956 | 0      | 0.0097 | 0      | 0.298778 | 0.6665 | 0.667 | H |
| Bacteria;Proteobacteria;Gammaproteobacteria;Enterobacteriales;Enterobacteriaceae;Citroba     | 0.000169 | 0      | 0.0001 | 0      | 0.307134 | 0.846  | 0.846 | C |
| Bacteria;Proteobacteria;Betaproteobacteria;Burkholderiales;Sutterellaceae;Parasutterella     | 0.013753 | 0.0025 | 0.0151 | 0.0025 | 0.312852 | 0.846  | 0.846 | C |
| Bacteria;Firmicutes;Clostridia;Clostridiales;Peptostreptococcaceae;Clostridium_XI            | 0.002028 | 0.0004 | 0.0032 | 0.0006 | 0.322451 | 0.846  | 0.846 | C |
| Bacteria;Actinobacteria;Actinobacteria;Coriobacteriales;Coriobacteriaceae;Collinsella        | 0.001207 | 0.0001 | 0.0024 | 0.0002 | 0.329414 | 0.846  | 0.846 | C |
| Bacteria;Proteobacteria;Epsilonproteobacteria;Campylobacteriales;Campylobacteraceae;Carr     | 1.47E-05 | 0      | 7E-05  | 0      | 0.333493 | 0.846  | 0.846 | C |
| Bacteria;Bacteroidetes;Bacteroidia;Bacteroidales;Porphyromonadaceae;Porphyromonas            | 0.000004 | 0      | 4E-06  | 0      | 0.333917 | 0.846  | 0.846 | C |
| Bacteria;Bacteroidetes;Bacteroidia;Bacteroidales;Prevotellaceae;Paraprevotella               | 0.005156 | 0      | 0.0053 | 0      | 0.340334 | 0.846  | 0.846 | C |
| Bacteria;Proteobacteria;Gammaproteobacteria;Enterobacteriales;Enterobacteriaceae;Proteus     | 4.67E-05 | 0      | 5E-05  | 0      | 0.369448 | 0.8678 | 0.868 | C |
| Bacteria;Firmicutes;Clostridia;Clostridiales;Lachnospiraceae;Oribacterium                    | 9.33E-06 | 0      | 1E-05  | 0      | 0.375216 | 0.8678 | 0.868 | C |
| Bacteria;Bacteroidetes;Bacteroidia;Bacteroidales;Porphyromonadaceae;Parabacteroides          | 0.017597 | 0.0077 | 0.0106 | 0.0077 | 0.37681  | 0.8096 | 0.81  | H |
| Bacteria;Actinobacteria;Actinobacteria;Coriobacteriales;Coriobacteriaceae;Eggerthella        | 0.000252 | 0      | 0.0002 | 0      | 0.381554 | 0.8096 | 0.81  | H |
| Bacteria;Firmicutes;Clostridia;Clostridiales;Lachnospiraceae;Roseburia                       | 0.043189 | 0.0272 | 0.041  | 0.0303 | 0.383944 | 0.8678 | 0.868 | C |
| Bacteria;Firmicutes;Clostridia;Clostridiales;Ruminococcaceae;Pseudoflavonifractor            | 0.000016 | 0      | 1E-05  | 0      | 0.389028 | 0.8678 | 0.868 | C |
| Bacteria;Firmicutes;Clostridia;Clostridiales;Ruminococcaceae;Anaerofilum                     | 1.73E-05 | 0      | 1E-05  | 0      | 0.413082 | 0.8752 | 0.875 | C |
| Bacteria;Proteobacteria;Gammaproteobacteria;Enterobacteriales;Enterobacteriaceae;Enterot     | 7.87E-05 | 0      | 0.0001 | 0      | 0.417541 | 0.8752 | 0.875 | C |
| Bacteria;Bacteroidetes;Bacteroidia;Bacteroidales;Bacteroidaceae;Bacteroides                  | 0.276588 | 0.2571 | 0.2872 | 0.2857 | 0.422519 | 0.8752 | 0.875 | C |
| Bacteria;Firmicutes;Erysipelotrichia;Erysipelotrichales;Erysipelotrichaceae;Clostridium_XV   | 0.002741 | 0.0013 | 0.0038 | 0.0013 | 0.449125 | 0.9178 | 0.918 | H |
| Bacteria;Bacteroidetes;Bacteroidia;Bacteroidales;Porphyromonadaceae;Barnesiella              | 0.005713 | 0      | 0.0021 | 0.0001 | 0.453613 | 0.9178 | 0.918 | H |
| Bacteria;Firmicutes;Erysipelotrichia;Erysipelotrichales;Erysipelotrichaceae;Erysipelotrichac | 0.004653 | 0.0003 | 0.0028 | 0.0006 | 0.481866 | 0.9528 | 0.953 | H |
| Bacteria;Cyanobacteria/Chloroplast;Chloroplast;Chloroplast;Chloroplast;Streptophyta          | 2.13E-05 | 0      | 2E-05  | 0      | 0.492999 | 0.9531 | 0.953 | H |

**Table S9 The relative abundance of the 30 OTUs markers in each sample from the discovery cohort**

| sample  | OTU_10  | OTU_12  | OTU_28  | OTU_57  | OTU_58  | OTU_63  | OTU_78  | OTU_86  | OTU_87  | OTU_96 | OTU_97  | OTU_128  |
|---------|---------|---------|---------|---------|---------|---------|---------|---------|---------|--------|---------|----------|
| H_20    | 0       | 0       | 0       | 0.00132 | 0       | 0.0003  | 0       | 0.01013 | 0       | 0      | 0.00871 | 0.020973 |
| H_N204  | 0       | 0       | 0       | 0.00021 | 0.00041 | 0       | 0.10756 | 0       | 0       | 0      | 0.00031 | 0.002055 |
| H_37    | 0       | 0       | 0       | 0.00223 | 0       | 0       | 0       | 0       | 0.00051 | 0      | 0.0004  | 0.002124 |
| H_N68   | 0.04473 | 0       | 0.01917 | 0.00268 | 0.00041 | 0.00072 | 0       | 0.00237 | 0       | 0      | 0.00155 | 0.000515 |
| H_44    | 0       | 0       | 0       | 0       | 0.00031 | 0.0001  | 0.02897 | 0.00112 | 0.0002  | 0      | 0.00061 | 0.000816 |
| H_N105  | 0.02706 | 0.00011 | 0       | 0.02201 | 0.00305 | 0       | 0       | 0.00505 | 0.00011 | 0      | 0.00105 | 0.000527 |
| H_34    | 0       | 0       | 0       | 0.00042 | 0.0041  | 0       | 0.00021 | 0       | 0.00452 | 0      | 0.00462 | 0.000525 |
| H_N39   | 0.00206 | 0       | 0       | 0.00021 | 0       | 0       | 0       | 0.01216 | 0.00144 | 0      | 0.00031 | 0.001031 |
| H_52    | 0.00834 | 0       | 0.08075 | 0.00042 | 0.00094 | 0       | 0.0247  | 0.00281 | 0.00052 | 0      | 0       | 0.000729 |
| H_17    | 0       | 0       | 0       | 0       | 0       | 0       | 0       | 0.01411 | 0       | 0      | 0.01585 | 0.011042 |
| H_N50   | 0       | 0       | 0       | 0       | 0       | 0.00093 | 0       | 0.00775 | 0       | 0      | 0       | 0.005477 |
| H_73    | 0       | 0       | 0       | 0.00102 | 0       | 0       | 0       | 0.01403 | 0.00348 | 0      | 0.0002  | 0.002663 |
| H_22    | 0       | 0       | 0       | 0.01148 | 0.00424 | 0       | 0.04032 | 0.00507 | 0       | 0      | 0.00021 | 0.001137 |
| H_8     | 0       | 0       | 0.00246 | 0       | 0.00102 | 0.00184 | 0       | 0.0248  | 0.0001  | 0      | 0.00051 | 0.00287  |
| H_71    | 0.0001  | 0       | 0       | 0.00071 | 0       | 0.0001  | 0       | 0.00661 | 0       | 0      | 0       | 0.004268 |
| H_N91   | 0       | 0       | 0       | 0.00064 | 0.00646 | 0       | 0       | 0.00169 | 0       | 0      | 0.00074 | 0.000212 |
| H_24    | 0       | 0       | 0.08368 | 0.00336 | 0.00203 | 0       | 0.01149 | 0.00051 | 0.00112 | 0      | 0.00081 | 0.001118 |
| H_N76   | 0       | 0       | 0       | 0       | 0.00615 | 0.0004  | 0       | 0       | 0.00746 | 0      | 0.00292 | 0.000907 |
| H_54    | 0       | 0       | 0       | 0.00091 | 0       | 0       | 0       | 0       | 0       | 0      | 0.0003  | 0.001923 |
| H_N181  | 0       | 0       | 0       | 0.0121  | 0       | 0       | 0       | 0.00949 | 0       | 0      | 0.00188 | 0.000522 |
| H_N1212 | 0       | 0       | 0.01406 | 0.01459 | 0.0016  | 0.00043 | 0       | 0.01204 | 0       | 0      | 0.00362 | 0.005219 |
| H_15    | 0.00216 | 0.0001  | 0.03879 | 0.00072 | 0.00072 | 0       | 0.01708 | 0.00216 | 0.0001  | 0      | 0.00082 | 0.001955 |
| H_46    | 0       | 0.00308 | 0       | 0.00096 | 0.00223 | 0       | 0       | 0.00892 | 0       | 0      | 0.00064 | 0.001486 |
| H_N132  | 0       | 0.0001  | 0       | 0.0002  | 0.00672 | 0       | 0.00061 | 0       | 0.00041 | 0      | 0.00092 | 0.000204 |
| H_N260  | 0       | 0       | 0.01891 | 0.00062 | 0.00021 | 0.00021 | 0.02785 | 0.0054  | 0.00094 | 0      | 0.00125 | 0.000831 |
| H_70    | 0.14927 | 0.00755 | 0       | 0       | 0       | 0.00224 | 0       | 0.00286 | 0       | 0      | 0.00041 | 0.002857 |
| H_27    | 0       | 0       | 0.04049 | 0.02458 | 0.00286 | 0.00255 | 0       | 0.00979 | 0       | 0      | 0.00714 | 0.013563 |
| H_N57   | 0       | 0       | 0       | 0       | 0       | 0.0001  | 0       | 0.00589 | 0       | 0      | 0.00142 | 0.000406 |
| H_N72   | 0       | 0       | 0       | 0       | 0       | 0       | 0       | 0.0004  | 0       | 0      | 0.0001  | 0.000703 |
| H_77    | 0       | 0       | 0       | 0       | 0       | 0       | 0       | 0.02647 | 0       | 0      | 0.0001  | 0.001737 |
| H_N197  | 0.08087 | 0       | 0       | 0.0001  | 0       | 0.00084 | 0       | 0       | 0       | 0      | 0.00492 | 0.000105 |
| H_6     | 0       | 0.00962 | 0.03143 | 0.00031 | 0.00176 | 0       | 0.0092  | 0.00062 | 0.00331 | 0      | 0.00238 | 0.00031  |
| H_N55   | 0       | 0       | 0.00754 | 0.00064 | 0.00892 | 0       | 0       | 0.00308 | 0.00011 | 0      | 0.00053 | 0.002019 |
| H_64    | 0       | 0.0001  | 0.02796 | 0.0001  | 0.00041 | 0       | 0       | 0.00226 | 0.0001  | 0      | 0.0001  | 0.000514 |
| H_63    | 0       | 0       | 0       | 0.00032 | 0.00159 | 0       | 0       | 0       | 0       | 0      | 0.00074 | 0.002014 |
| H_53    | 0       | 0       | 0       | 0.00061 | 0.0002  | 0.0002  | 0       | 0.00284 | 0.0001  | 0      | 0.0003  | 0.007314 |
| H_5     | 0       | 0       | 0       | 0.00274 | 0       | 0.00071 | 0       | 0.05396 | 0       | 0      | 0.00559 | 0.003455 |
| H_N264  | 0       | 0       | 0       | 0.00424 | 0.00011 | 0.00169 | 0.00011 | 0.00021 | 0       | 0      | 0       | 0        |
| H_N1022 | 0       | 0       | 0       | 0.00052 | 0.00227 | 0       | 0       | 0.00083 | 0.00052 | 0      | 0.00083 | 0.001341 |
| H_76    | 0       | 0       | 0       | 0       | 0.00134 | 0       | 0       | 0.01571 | 0       | 0      | 0.00236 | 0.000514 |
| H_40    | 0       | 0       | 0       | 0.0001  | 0.0001  | 0       | 0       | 0.03241 | 0       | 0      | 0.00163 | 0.001121 |
| H_N145  | 0       | 0       | 0.0423  | 0.0026  | 0.00188 | 0.00063 | 0       | 0.02136 | 0       | 0      | 0.00115 | 0.002709 |
| H_N258  | 0       | 0       | 0       | 0.0007  | 0       | 0       | 0       | 0.07215 | 0       | 0      | 0.0003  | 0.001107 |
| H_14    | 0       | 0       | 0       | 0.00061 | 0.00041 | 0.00031 | 0.01017 | 0.00234 | 0.00275 | 0      | 0       | 0.001221 |
| H_13    | 0.01517 | 0       | 0       | 0.00031 | 0.00041 | 0       | 0       | 0       | 0       | 0      | 0.00061 | 0.001537 |
| H_55    | 0       | 0       | 0       | 0.00062 | 0.0074  | 0       | 0       | 0.00442 | 0.0001  | 0      | 0.00062 | 0.000822 |
| H_25    | 0       | 0.01715 | 0       | 0.01398 | 0.00245 | 0       | 0       | 0.00102 | 0.00388 | 0      | 0.00439 | 0.002144 |
| H_N109  | 0       | 0       | 0.07094 | 0.00218 | 0.00291 | 0       | 0.00655 | 0.00094 | 0.00031 | 0      | 0       | 0.000416 |
| H_61    | 0       | 0       | 0       | 0.00021 | 0.00063 | 0       | 0       | 0.04329 | 0.0001  | 0      | 0       | 0.000941 |
| H_28    | 0.12541 | 0       | 0       | 0.0003  | 0       | 0.0001  | 0       | 0.00122 | 0       | 0      | 0.00467 | 0.001626 |
| H_N177  | 0       | 0.00165 | 0.05456 | 0.00022 | 0.00132 | 0.00066 | 0       | 0.00408 | 0.00055 | 0      | 0.00022 | 0.00011  |
| H_9     | 0       | 0       | 0       | 0.00235 | 0       | 0.00024 | 0       | 0       | 0       | 0      | 0.0033  | 0        |

|         |         |         |         |         |         |         |         |         |         |         |         |          |
|---------|---------|---------|---------|---------|---------|---------|---------|---------|---------|---------|---------|----------|
| H_33    | 0       | 0       | 0.09485 | 0       | 0.00062 | 0       | 0.09834 | 0.00308 | 0.00133 | 0       | 0.00144 | 0.000411 |
| H_26    | 0       | 0       | 0       | 0.0045  | 0.00323 | 0.00023 | 0       | 0.0015  | 0.0045  | 0       | 0.00381 | 0.006458 |
| H_N40   | 0       | 0       | 0       | 0.00193 | 0.00398 | 0       | 0       | 0.00875 | 0.0033  | 0       | 0.00011 | 0.001705 |
| H_N121  | 0       | 0       | 0.01933 | 0.01651 | 0.00324 | 0.0001  | 0       | 0.01431 | 0       | 0       | 0.00313 | 0.006477 |
| H_23    | 0       | 0       | 0       | 0.00113 | 0.02827 | 0       | 0       | 0.00041 | 0.00898 | 0       | 0.00454 | 0.001341 |
| H_N56   | 0       | 0.00082 | 0       | 0.00031 | 0.0001  | 0       | 0       | 0       | 0.00357 | 0       | 0       | 0.000102 |
| H_N164  | 0       | 0       | 0       | 0       | 0       | 0       | 0       | 0.19351 | 0.00041 | 0       | 0.00041 | 0.003006 |
| H_12    | 0.0001  | 0       | 0       | 0.00082 | 0.00092 | 0       | 0       | 0.00051 | 0.00061 | 0       | 0.00112 | 0.001632 |
| H_N75   | 0       | 0       | 0       | 0.00115 | 0.00781 | 0.00063 | 0       | 0.00125 | 0.00292 | 0       | 0.00208 | 0.000521 |
| H_47    | 0       | 0       | 0       | 0.0001  | 0.00072 | 0.00082 | 0.0075  | 0.00472 | 0.00041 | 0       | 0.0001  | 0.000308 |
| H_N84   | 0       | 0       | 0       | 0.00104 | 0.00135 | 0.00135 | 0       | 0.01396 | 0.00021 | 0       | 0.00042 | 0.006044 |
| H_42    | 0       | 0       | 0       | 0       | 0       | 0.00031 | 0       | 0       | 0       | 0       | 0.0001  | 0.001848 |
| H_N9    | 0       | 0       | 0       | 0.00295 | 0       | 0.00499 | 0       | 0.04551 | 0       | 0       | 0.0002  | 0.004479 |
| H_N52   | 0       | 0       | 0       | 0.00391 | 0       | 0       | 0       | 0.00652 | 0       | 0       | 0.00011 | 0.000978 |
| H_62    | 0.00076 | 0       | 0.04032 | 0       | 0.00032 | 0       | 0.0107  | 0.00984 | 0       | 0       | 0.00043 | 0        |
| H_1     | 0       | 0       | 0       | 0.00384 | 0       | 0.00586 | 0       | 0.03536 | 0       | 0       | 0.0002  | 0.011314 |
| H_N111  | 0       | 0.00938 | 0       | 0.01    | 0.00806 | 0       | 0       | 0.00153 | 0.00561 | 0       | 0.0002  | 0.001428 |
| H_N54   | 0.01913 | 0       | 0       | 0       | 0       | 0       | 0       | 0.17403 | 0       | 0       | 0.00094 | 0        |
| H_N102  | 0       | 0       | 0       | 0.00051 | 0.00164 | 0       | 0       | 0.00062 | 0.00021 | 0       | 0.00103 | 0.001541 |
| H_4     | 0       | 0       | 0.0001  | 0.00061 | 0       | 0.01049 | 0       | 0.00194 | 0       | 0       | 0.00082 | 0.000306 |
| H_36    | 0.09717 | 0       | 0       | 0.0001  | 0       | 0.00102 | 0       | 0       | 0       | 0       | 0.0049  | 0.000409 |
| H_16    | 0       | 0.00524 | 0       | 0.00164 | 0.00072 | 0.00051 | 0       | 0       | 0.01038 | 0       | 0.00041 | 0.002159 |
| H_69    | 0       | 0       | 0       | 0.00032 | 0.00168 | 0       | 0       | 0.01103 | 0.00021 | 0       | 0.00053 | 0.00063  |
| C_82    | 0       | 0       | 0       | 0       | 0.0001  | 0       | 0       | 0.00876 | 0.00031 | 0       | 0.0001  | 0        |
| C_62    | 0       | 0       | 0       | 0.00011 | 0.00118 | 0       | 0       | 0.00021 | 0       | 0       | 0.00011 | 0.000857 |
| C_60    | 0.02004 | 0       | 0       | 0.00021 | 0.0001  | 0.00904 | 0       | 0.0001  | 0.00623 | 0       | 0.01194 | 0.004777 |
| C_32    | 0.00614 | 0       | 0       | 0.00208 | 0.0001  | 0.00083 | 0       | 0       | 0.0051  | 0       | 0.0001  | 0.001456 |
| C_HCC20 | 0.04702 | 0       | 0       | 0       | 0       | 0       | 0       | 0       | 0       | 0       | 0.00061 | 0        |
| C_11    | 0       | 0       | 0       | 0       | 0       | 0       | 0.0002  | 0.00762 | 0       | 0       | 0.00061 | 0.000305 |
| C_75    | 0.13476 | 0       | 0       | 0       | 0       | 0.00885 | 0       | 0.01688 | 0.00295 | 0       | 0.0001  | 0.000407 |
| C_61    | 0.0001  | 0.0002  | 0.01545 | 0.00051 | 0.00041 | 0       | 0       | 0.00348 | 0       | 0.00706 | 0       | 0        |
| C_88    | 0.00319 | 0.00042 | 0       | 0.00011 | 0.00011 | 0       | 0       | 0       | 0.00255 | 0.02028 | 0.00223 | 0        |
| C_18    | 0.07219 | 0.00021 | 0       | 0.00147 | 0.00283 | 0.0021  | 0       | 0.00315 | 0.00168 | 0       | 0.00021 | 0.002308 |
| C_HCC17 | 0       | 0       | 0       | 0.00205 | 0       | 0.00133 | 0       | 0.01105 | 0       | 0       | 0       | 0        |
| C_HCC17 | 0.03337 | 0       | 0       | 0       | 0       | 0       | 0       | 0       | 0       | 0       | 0       | 0.000304 |
| C_94    | 0       | 0.00032 | 0       | 0       | 0.00084 | 0.00411 | 0       | 0.0019  | 0.01264 | 0       | 0.00011 | 0        |
| C_36    | 0       | 0.00031 | 0       | 0.0002  | 0.0001  | 0.00051 | 0.01396 | 0.01029 | 0       | 0       | 0.0001  | 0.001121 |
| C_HCC22 | 0.0001  | 0       | 0       | 0       | 0       | 0       | 0       | 0       | 0       | 0       | 0.00061 | 0.000205 |
| C_12    | 0       | 0.00063 | 0       | 0.02229 | 0.00084 | 0       | 0       | 0       | 0       | 0       | 0.00795 | 0.000942 |
| C_101   | 0.06915 | 0       | 0       | 0.00715 | 0.00021 | 0       | 0       | 0.00032 | 0.00011 | 0       | 0       | 0.000105 |
| C_86    | 0.11763 | 0.0019  | 0       | 0.00021 | 0.00042 | 0       | 0       | 0.00063 | 0.00084 | 0       | 0.00032 | 0.000948 |
| C_106   | 0       | 0.0001  | 0       | 0.00114 | 0.00042 | 0.00031 | 0       | 0.022   | 0.00021 | 0       | 0.00052 | 0        |
| C_HCC20 | 0       | 0       | 0       | 0       | 0       | 0       | 0       | 0.0002  | 0.00031 | 0       | 0.00164 | 0.001332 |
| C_54    | 0.00051 | 0.0001  | 0       | 0       | 0.00163 | 0       | 0       | 0.00834 | 0.0304  | 0       | 0.00031 | 0.00183  |
| C_69    | 0       | 0       | 0       | 0       | 0       | 0       | 0       | 0       | 0.02556 | 0       | 0.00052 | 0.000105 |
| C_85    | 0.09807 | 0       | 0       | 0       | 0.00083 | 0.0001  | 0       | 0.02026 | 0       | 0       | 0.00031 | 0.000312 |
| C_73    | 0       | 0.00081 | 0       | 0       | 0.00051 | 0       | 0       | 0.01643 | 0.0001  | 0       | 0       | 0.000304 |
| C_64    | 0.00078 | 0.00011 | 0       | 0.00078 | 0.00224 | 0       | 0       | 0.00078 | 0.00034 | 0       | 0.00011 | 0        |
| C_HCC22 | 0       | 0       | 0       | 0       | 0       | 0.00464 | 0       | 0       | 0.00494 | 0       | 0.00101 | 0.007457 |
| C_HCC16 | 0       | 0       | 0.0004  | 0.00091 | 0       | 0.0002  | 0       | 0.00476 | 0       | 0       | 0.00081 | 0.000202 |
| C_28    | 0.096   | 0       | 0       | 0.00031 | 0       | 0       | 0       | 0.02749 | 0       | 0       | 0.00062 | 0.001041 |
| C_46    | 0       | 0.00224 | 0       | 0.00061 | 0.00143 | 0.0002  | 0       | 0.00122 | 0       | 0       | 0.0002  | 0.000816 |
| C_HCC22 | 0       | 0.00021 | 0.03236 | 0       | 0.00053 | 0       | 0       | 0       | 0.00011 | 0       | 0.00043 | 0.001384 |
| C_89    | 0.0001  | 0       | 0       | 0       | 0       | 0.11185 | 0       | 0       | 0       | 0       | 0.0001  | 0        |

|         |         |         |         |         |         |         |         |         |         |         |         |          |
|---------|---------|---------|---------|---------|---------|---------|---------|---------|---------|---------|---------|----------|
| C_14    | 0       | 0       | 0       | 0       | 0       | 0       | 0       | 0       | 0.0001  | 0       | 0.00031 | 0.000104 |
| C_20    | 0       | 0       | 0       | 0       | 0.00012 | 0       | 0       | 0.00023 | 0.00023 | 0       | 0.00012 | 0        |
| C_90    | 0       | 0       | 0       | 0       | 0       | 0.00394 | 0       | 0       | 0       | 0       | 0       | 0        |
| C_HCC17 | 0       | 0       | 0       | 0.00101 | 0.00011 | 0.01218 | 0       | 0       | 0       | 0       | 0.00011 | 0.000559 |
| C_19    | 0       | 0.00233 | 0       | 0.00142 | 0.00081 | 0       | 0       | 0       | 0.00618 | 0       | 0.0003  | 0.000101 |
| C_7     | 0       | 0.00287 | 0       | 0.0001  | 0.00102 | 0       | 0       | 0.00102 | 0.01558 | 0       | 0.00051 | 0.000512 |
| C_HCC21 | 0       | 0       | 0       | 0       | 0       | 0.00152 | 0       | 0.0001  | 0       | 0       | 0.00091 | 0.000101 |
| C_HCC22 | 0       | 0       | 0       | 0       | 0       | 0.08386 | 0       | 0.17693 | 0       | 0       | 0.00157 | 0        |
| C_HCC16 | 0       | 0       | 0       | 0       | 0       | 0.0003  | 0       | 0       | 0.00896 | 0.00171 | 0.0001  | 0.010969 |
| C_HCC23 | 0       | 0       | 0       | 0       | 0       | 0.01137 | 0       | 0.00481 | 0.00051 | 0       | 0.0001  | 0.001741 |
| C_102   | 0       | 0       | 0       | 0.0001  | 0       | 0.01052 | 0       | 0       | 0.0011  | 0       | 0.0001  | 0.001002 |
| C_13    | 0       | 0.0001  | 0       | 0       | 0       | 0.00084 | 0       | 0       | 0       | 0       | 0.00031 | 0        |
| C_83    | 0       | 0       | 0       | 0       | 0.0003  | 0       | 0       | 0       | 0       | 0       | 0       | 0.000102 |
| C_74    | 0.00642 | 0       | 0       | 0       | 0       | 0.00061 | 0       | 0.00122 | 0.00112 | 0       | 0.00194 | 0.000102 |
| C_38    | 0       | 0       | 0       | 0       | 0       | 0.0002  | 0       | 0       | 0       | 0       | 0.0001  | 0.00409  |
| C_109   | 0       | 0       | 0       | 0       | 0       | 0.00151 | 0       | 0       | 0.00162 | 0       | 0.0002  | 0.000303 |
| C_49    | 0       | 0.0001  | 0.0002  | 0.00051 | 0.00101 | 0.00538 | 0       | 0.00669 | 0       | 0       | 0.00061 | 0.004869 |
| C_47    | 0.00011 | 0       | 0       | 0.0172  | 0.00044 | 0.00022 | 0       | 0.00452 | 0.00022 | 0       | 0.00176 | 0.001433 |
| C_39    | 0       | 0.00574 | 0       | 0.0001  | 0.00174 | 0.00051 | 0.01569 | 0.02369 | 0.00144 | 0.01374 | 0.00041 | 0.00082  |
| C_44    | 0       | 0.024   | 0       | 0.0001  | 0.00051 | 0.03487 | 0       | 0       | 0.00021 | 0       | 0.00092 | 0.000513 |
| C_34    | 0.01223 | 0       | 0       | 0.00011 | 0       | 0.00022 | 0       | 0.01277 | 0.00011 | 0.00758 | 0.00011 | 0.001407 |
| C_24    | 0       | 0       | 0       | 0       | 0.0011  | 0.00624 | 0       | 0.00975 | 0.00011 | 0       | 0.00011 | 0.000657 |
| C_10    | 0       | 0.00063 | 0       | 0       | 0.00021 | 0.04903 | 0       | 0.00147 | 0.00031 | 0       | 0.0001  | 0.000629 |
| C_6     | 0.15226 | 0       | 0       | 0.00031 | 0.00084 | 0       | 0       | 0.00346 | 0.0001  | 0       | 0.00042 | 0.000943 |
| C_58    | 0       | 0.00857 | 0.00683 | 0.00071 | 0       | 0.0001  | 0       | 0.01989 | 0.00898 | 0       | 0.00235 | 0.004692 |
| C_53    | 0       | 0.00359 | 0       | 0.00044 | 0.00174 | 0       | 0       | 0.00359 | 0.00033 | 0.01947 | 0.00076 | 0.000109 |
| C_68    | 0       | 0.00553 | 0       | 0.00061 | 0.00184 | 0.00092 | 0       | 0.02959 | 0       | 0       | 0.0001  | 0        |
| C_23    | 0       | 0       | 0       | 0.05354 | 0       | 0.0001  | 0       | 0.00932 | 0       | 0       | 0.00717 | 0        |
| C_81    | 0       | 0.00277 | 0       | 0.00011 | 0.001   | 0.00133 | 0       | 0.00044 | 0.00011 | 0       | 0.00033 | 0.000443 |
| C_51    | 0       | 0       | 0       | 0       | 0       | 0.00031 | 0       | 0       | 0       | 0       | 0.00031 | 0.000306 |
| C_HCC18 | 0       | 0       | 0       | 0.00052 | 0       | 0       | 0       | 0.00041 | 0       | 0       | 0.0001  | 0.00404  |
| C_95    | 0       | 0       | 0       | 0.00011 | 0.00011 | 0.00033 | 0       | 0.00099 | 0       | 0       | 0       | 0.00011  |
| C_HCC17 | 0.0064  | 0       | 0.01807 | 0       | 0.00072 | 0       | 0.00578 | 0.00103 | 0.00052 | 0       | 0.00021 | 0        |
| C_HCC20 | 0.00675 | 0       | 0       | 0.00056 | 0.00045 | 0.00101 | 0       | 0.00315 | 0.00011 | 0       | 0.00011 | 0.000337 |
| C_27    | 0       | 0.00031 | 0       | 0.00031 | 0       | 0.03058 | 0       | 0.05704 | 0       | 0       | 0.00145 | 0.005063 |
| C_HCC17 | 0.00011 | 0.00279 | 0       | 0.00011 | 0.00086 | 0.00441 | 0       | 0.00559 | 0.00011 | 0       | 0.00086 | 0        |
| C_77    | 0       | 0       | 0       | 0       | 0       | 0       | 0       | 0       | 0       | 0       | 0       | 0        |
| C_63    | 0.01517 | 0       | 0       | 0.00021 | 0       | 0.00158 | 0       | 0       | 0.00021 | 0       | 0.00032 | 0.000105 |
| C_105   | 0.00609 | 0       | 0       | 0       | 0       | 0       | 0       | 0       | 0.00011 | 0       | 0.00011 | 0.000435 |
| C_91    | 0.09063 | 0       | 0       | 0.0001  | 0.00031 | 0       | 0       | 0.02435 | 0.00174 | 0       | 0.00061 | 0        |
| C_29    | 0       | 0.00674 | 0       | 0.00122 | 0.00061 | 0.00286 | 0       | 0.00122 | 0.01755 | 0       | 0.00296 | 0.002245 |
| C_HCC23 | 0       | 0       | 0       | 0.0001  | 0       | 0.04529 | 0       | 0       | 0.00021 | 0       | 0.00187 | 0.002187 |
| C_22    | 0.01145 | 0       | 0.03158 | 0.00138 | 0.0017  | 0.00127 | 0       | 0.0053  | 0.00064 | 0       | 0.00106 | 0.000212 |
| C_41    | 0.00031 | 0.00094 | 0       | 0.0001  | 0.00533 | 0.0092  | 0       | 0.0001  | 0.00115 | 0       | 0.0001  | 0.001359 |
| ELC_31  | 0       | 0       | 0       | 0       | 0       | 0.01338 | 0       | 0       | 0       | 0       | 0.00061 | 0.000102 |
| ELC_19  | 0       | 0.00041 | 0       | 0       | 0.0003  | 0       | 0       | 0.00162 | 0       | 0       | 0.00071 | 0.00071  |
| ELC_44  | 0.00276 | 0.0032  | 0       | 0.00011 | 0.00231 | 0       | 0       | 0       | 0.00033 | 0       | 0.00066 | 0.00022  |
| ELC_56  | 0       | 0       | 0       | 0.00524 | 0.0036  | 0.00144 | 0       | 0       | 0       | 0       | 0.00021 | 0.000411 |
| ELC_63  | 0       | 0       | 0       | 0.0008  | 0       | 0.0003  | 0       | 0.0007  | 0       | 0       | 0.00161 | 0.000503 |
| ELC_47  | 0.05912 | 0.00031 | 0       | 0       | 0.00093 | 0       | 0       | 0.00113 | 0       | 0       | 0.00103 | 0.000721 |
| ELC_20  | 0       | 0       | 0       | 0       | 0.00074 | 0       | 0       | 0.00326 | 0.00011 | 0       | 0.00032 | 0.000105 |
| ELC_43  | 0       | 0       | 0       | 0.00041 | 0       | 0       | 0       | 0.07245 | 0       | 0       | 0.00206 | 0        |
| ELC_13A | 0.00042 | 0       | 0       | 0.00368 | 0       | 0       | 0       | 0.0267  | 0       | 0       | 0.00042 | 0.003995 |
| ELC_33  | 0.00485 | 0       | 0       | 0.0001  | 0.0002  | 0.00142 | 0       | 0.00263 | 0.0004  | 0       | 0.0004  | 0.000202 |

|         |         |         |         |         |         |         |         |         |         |         |         |          |
|---------|---------|---------|---------|---------|---------|---------|---------|---------|---------|---------|---------|----------|
| ELC_40  | 0.01531 | 0.00092 | 0.02322 | 0.00021 | 0.0038  | 0       | 0       | 0.0038  | 0       | 0       | 0.00041 | 0.000103 |
| ELC_22  | 0       | 0.00142 | 0       | 0.00132 | 0.00051 | 0.02325 | 0       | 0.00568 | 0.0002  | 0       | 0.00041 | 0.001523 |
| ELC_18  | 0       | 0       | 0       | 0.00061 | 0       | 0       | 0       | 0.0224  | 0       | 0       | 0.00404 | 0.019275 |
| ELC_61  | 0       | 0       | 0.00514 | 0.00072 | 0.00123 | 0       | 0       | 0.01398 | 0       | 0       | 0       | 0.000411 |
| ELC_24  | 0       | 0       | 0       | 0       | 0       | 0.00092 | 0.00907 | 0       | 0       | 0       | 0.0001  | 0        |
| ELC_29  | 0.03923 | 0.00502 | 0       | 0.00063 | 0.00126 | 0       | 0       | 0.0001  | 0.00021 | 0       | 0.00052 | 0.000314 |
| ELC_42  | 0       | 0.00021 | 0       | 0       | 0.00053 | 0.01754 | 0       | 0.01106 | 0       | 0.00128 | 0.00074 | 0.000319 |
| ELC_17  | 0       | 0       | 0       | 0       | 0       | 0       | 0       | 0.00223 | 0.0003  | 0       | 0       | 0.000508 |
| ELC_38  | 0       | 0       | 0       | 0       | 0       | 0.0001  | 0       | 0.01449 | 0       | 0       | 0.0002  | 0        |
| ELC_7A  | 0       | 0       | 0.00408 | 0       | 0       | 0       | 0       | 0       | 0       | 0       | 0.00061 | 0.00051  |
| ELC_58  | 0       | 0       | 0.00348 | 0.00082 | 0       | 0.03339 | 0       | 0.00338 | 0       | 0       | 0.0002  | 0.003688 |
| ELC_46  | 0       | 0       | 0.00877 | 0.00136 | 0.00439 | 0.10673 | 0       | 0.00157 | 0.00031 | 0       | 0.00021 | 0        |
| ELC_25  | 0       | 0       | 0       | 0.00104 | 0       | 0       | 0       | 0.0026  | 0       | 0       | 0.00021 | 0.00177  |
| ELC_51  | 0       | 0       | 0       | 0       | 0       | 0.00191 | 0       | 0.01672 | 0.0001  | 0       | 0.0001  | 0        |
| ELC_117 | 0.08041 | 0       | 0.00083 | 0       | 0.00207 | 0.00517 | 0       | 0.01054 | 0.0001  | 0       | 0.00062 | 0        |
| ELC_21  | 0       | 0       | 0.00792 | 0       | 0.0001  | 0       | 0       | 0       | 0       | 0       | 0.0003  | 0.000203 |
| ELC_28  | 0       | 0       | 0       | 0       | 0.00072 | 0.0001  | 0.02523 | 0.00092 | 0.00112 | 0       | 0.00051 | 0.001124 |
| ELC_37  | 0       | 0       | 0       | 0.00023 | 0.00023 | 0       | 0       | 0.00992 | 0       | 0       | 0.00069 | 0.000346 |
| ELC_115 | 0.00224 | 0       | 0       | 0.00395 | 0.00021 | 0.00556 | 0       | 0.0015  | 0       | 0       | 0.00085 | 0.000641 |
| ELC_48  | 0.00853 | 0.00021 | 0       | 0.0001  | 0.00103 | 0       | 0       | 0.00658 | 0.0001  | 0       | 0.00041 | 0        |
| ELC_45  | 0       | 0.00072 | 0.0135  | 0       | 0.0001  | 0.02516 | 0       | 0       | 0       | 0       | 0.00031 | 0        |
| ELC_23  | 0.00246 | 0.00051 | 0       | 0.00062 | 0.00174 | 0       | 0.00216 | 0.00821 | 0.00021 | 0       | 0.00082 | 0.000205 |
| ELC_41  | 0       | 0       | 0       | 0       | 0       | 0.01317 | 0       | 0       | 0       | 0       | 0.00302 | 0        |
| ELC_35  | 0       | 0       | 0       | 0.0002  | 0       | 0       | 0       | 0       | 0       | 0       | 0.001   | 0.001708 |
| ELC_8A  | 0       | 0       | 0       | 0       | 0       | 0.0001  | 0       | 0.08184 | 0       | 0       | 0.00133 | 0        |
| ELC_65A | 0.04538 | 0       | 0       | 0       | 0       | 0.00333 | 0       | 0.0004  | 0       | 0       | 0.0001  | 0        |
| ELC_52  | 0       | 0.0001  | 0.01611 | 0       | 0.00181 | 0.00151 | 0       | 0.00554 | 0       | 0       | 0.0001  | 0        |
| ELC_11  | 0       | 0       | 0       | 0       | 0       | 0.00273 | 0       | 0.16945 | 0       | 0       | 0       | 0.000506 |
| ELC_36  | 0       | 0       | 0       | 0.00021 | 0.00139 | 0.00032 | 0       | 0.00086 | 0       | 0       | 0.0015  | 0        |
| ELC_30  | 0.01914 | 0       | 0.03634 | 0       | 0.00409 | 0.00154 | 0.00061 | 0       | 0       | 0       | 0.00051 | 0.001638 |

| OTU_136  | OTU_209  | OTU_285  | OTU_291 | OTU_310  | OTU_372 | OTU_373 | OTU_427 | OTU_451 | OTU_624  | OTU_664 | OTU_748  |
|----------|----------|----------|---------|----------|---------|---------|---------|---------|----------|---------|----------|
| 0        | 0        | 0        | 0       | 0.000608 | 0       | 0       | 0       | 0       | 0        | 0       | 0        |
| 0        | 0        | 0        | 0       | 0.000411 | 0       | 0       | 0       | 0       | 0        | 0       | 0        |
| 0        | 0        | 0        | 0       | 0.000303 | 0       | 0       | 0       | 0       | 0.000101 | 0       | 0        |
| 0        | 0        | 0        | 0.0001  | 0        | 0       | 0       | 0       | 0       | 0        | 0       | 0        |
| 0        | 0        | 0.000102 | 0       | 0        | 0       | 0       | 0       | 0       | 0        | 0       | 0.001224 |
| 0        | 0        | 0.000105 | 0       | 0        | 0       | 0       | 0       | 0       | 0.000316 | 0       | 0        |
| 0        | 0        | 0        | 0.00063 | 0        | 0       | 0       | 0       | 0       | 0.005568 | 0       | 0        |
| 0        | 0        | 0        | 0       | 0        | 0       | 0       | 0       | 0       | 0.000412 | 0       | 0.010309 |
| 0        | 0.000104 | 0        | 0       | 0        | 0       | 0       | 0       | 0       | 0        | 0       | 0.000417 |
| 0        | 0        | 0.000204 | 0       | 0        | 0       | 0       | 0       | 0       | 0        | 0       | 0        |
| 0        | 0        | 0        | 0       | 0        | 0       | 0       | 0.0001  | 0       | 0        | 0       | 0        |
| 0        | 0        | 0        | 0       | 0        | 0.00092 | 0       | 0       | 0       | 0        | 0       | 0        |
| 0        | 0.001344 | 0        | 0.00103 | 0.000207 | 0       | 0       | 0       | 0       | 0.000103 | 0       | 0        |
| 0        | 0        | 0        | 0       | 0.00041  | 0       | 0       | 0       | 0       | 0        | 0       | 0        |
| 0        | 0        | 0        | 0       | 0.000203 | 0       | 0.0001  | 0       | 0       | 0        | 0       | 0        |
| 0        | 0        | 0        | 0.00064 | 0        | 0       | 0       | 0       | 0       | 0.000106 | 0       | 0        |
| 0        | 0        | 0        | 0       | 0        | 0       | 0       | 0       | 0       | 0.000102 | 0       | 0        |
| 0.000101 | 0        | 0        | 0       | 0        | 0.00202 | 0       | 0       | 0       | 0.000403 | 0       | 0        |
| 0        | 0        | 0        | 0       | 0.001012 | 0       | 0       | 0       | 0       | 0        | 0       | 0        |
| 0        | 0        | 0        | 0       | 0        | 0       | 0       | 0       | 0       | 0        | 0       | 0        |
| 0        | 0        | 0        | 0       | 0        | 0       | 0       | 0       | 0       | 0        | 0       | 0        |
| 0        | 0        | 0        | 0.00031 | 0        | 0       | 0       | 0       | 0       | 0.00247  | 0       | 0        |
| 0        | 0        | 0        | 0       | 0        | 0       | 0       | 0       | 0       | 0.000743 | 0       | 0        |
| 0        | 0        | 0        | 0.00031 | 0        | 0       | 0       | 0       | 0       | 0        | 0       | 0.000306 |
| 0        | 0        | 0        | 0       | 0        | 0       | 0       | 0       | 0       | 0        | 0       | 0        |
| 0        | 0        | 0        | 0       | 0.000204 | 0       | 0       | 0       | 0       | 0        | 0       | 0        |
| 0        | 0        | 0        | 0       | 0.000408 | 0       | 0       | 0       | 0       | 0        | 0       | 0        |
| 0        | 0        | 0        | 0       | 0        | 0       | 0       | 0       | 0       | 0        | 0       | 0        |
| 0        | 0        | 0        | 0       | 0        | 0       | 0       | 0       | 0       | 0        | 0       | 0        |
| 0        | 0        | 0        | 0       | 0        | 0       | 0       | 0       | 0       | 0        | 0       | 0        |
| 0        | 0        | 0        | 0       | 0        | 0       | 0       | 0       | 0       | 0.000105 | 0       | 0        |
| 0        | 0        | 0        | 0       | 0        | 0       | 0       | 0       | 0.0001  | 0        | 0       | 0.001448 |
| 0        | 0        | 0        | 0.00085 | 0        | 0       | 0       | 0       | 0       | 0.000106 | 0       | 0        |
| 0        | 0        | 0        | 0       | 0        | 0       | 0       | 0       | 0       | 0        | 0       | 0        |
| 0        | 0        | 0        | 0.00042 | 0        | 0       | 0       | 0       | 0       | 0.002968 | 0       | 0        |
| 0        | 0        | 0        | 0       | 0        | 0       | 0       | 0       | 0       | 0        | 0       | 0        |
| 0        | 0        | 0.000102 | 0       | 0.000203 | 0       | 0       | 0       | 0       | 0        | 0       | 0        |
| 0        | 0        | 0        | 0       | 0.000318 | 0       | 0       | 0       | 0       | 0.000953 | 0       | 0        |
| 0        | 0        | 0        | 0.0001  | 0        | 0       | 0       | 0       | 0       | 0        | 0       | 0        |
| 0        | 0        | 0        | 0       | 0.000103 | 0       | 0       | 0       | 0       | 0        | 0       | 0        |
| 0        | 0        | 0        | 0       | 0        | 0       | 0.0001  | 0       | 0       | 0        | 0       | 0        |
| 0        | 0        | 0        | 0       | 0        | 0       | 0       | 0       | 0       | 0        | 0       | 0        |
| 0        | 0        | 0        | 0       | 0        | 0       | 0       | 0       | 0       | 0        | 0       | 0        |
| 0        | 0        | 0        | 0       | 0.000102 | 0       | 0.00031 | 0.0001  | 0       | 0        | 0       | 0        |
| 0        | 0        | 0        | 0       | 0.000205 | 0       | 0       | 0       | 0       | 0        | 0       | 0        |
| 0        | 0        | 0        | 0.00072 | 0.000103 | 0       | 0       | 0       | 0       | 0.000103 | 0       | 0        |
| 0        | 0        | 0        | 0       | 0        | 0       | 0       | 0       | 0       | 0        | 0       | 0        |
| 0        | 0        | 0        | 0       | 0        | 0       | 0       | 0       | 0       | 0        | 0       | 0        |
| 0        | 0        | 0        | 0       | 0        | 0       | 0.00021 | 0.00105 | 0       | 0        | 0       | 0        |
| 0        | 0        | 0        | 0       | 0.000305 | 0       | 0       | 0       | 0       | 0        | 0       | 0        |
| 0        | 0.00022  | 0        | 0       | 0.00011  | 0       | 0       | 0       | 0       | 0        | 0       | 0        |
| 0        | 0        | 0        | 0       | 0        | 0       | 0.02284 | 0       | 0       | 0        | 0       | 0        |



|          |          |          |         |          |         |         |         |         |          |   |          |
|----------|----------|----------|---------|----------|---------|---------|---------|---------|----------|---|----------|
| 0        | 0        | 0        | 0       | 0.000103 | 0       | 0       | 0       | 0       | 0        | 0 | 0.000205 |
| 0        | 0        | 0.000231 | 0.00104 | 0.000115 | 0       | 0.00012 | 0       | 0       | 0.004843 | 0 | 0.005535 |
| 0        | 0        | 0        | 0.00045 | 0        | 0       | 0       | 0       | 0       | 0.000114 | 0 | 0.000568 |
| 0        | 0        | 0        | 0       | 0.000209 | 0       | 0       | 0       | 0       | 0        | 0 | 0        |
| 0.000103 | 0.000103 | 0        | 0       | 0.000103 | 0       | 0       | 0       | 0.0001  | 0        | 0 | 0        |
| 0        | 0        | 0        | 0       | 0        | 0.0001  | 0       | 0       | 0       | 0        | 0 | 0        |
| 0        | 0        | 0        | 0       | 0        | 0       | 0       | 0       | 0       | 0        | 0 | 0        |
| 0        | 0        | 0        | 0.0001  | 0        | 0       | 0       | 0       | 0       | 0        | 0 | 0.000204 |
| 0        | 0        | 0        | 0.00073 | 0.000104 | 0.00021 | 0       | 0       | 0       | 0        | 0 | 0        |
| 0        | 0        | 0        | 0       | 0        | 0       | 0.0001  | 0       | 0       | 0.000103 | 0 | 0        |
| 0        | 0        | 0        | 0       | 0.000104 | 0       | 0       | 0       | 0       | 0        | 0 | 0        |
| 0        | 0        | 0        | 0       | 0        | 0       | 0       | 0       | 0       | 0        | 0 | 0        |
| 0        | 0        | 0        | 0       | 0        | 0       | 0       | 0       | 0       | 0        | 0 | 0        |
| 0        | 0        | 0        | 0       | 0        | 0       | 0       | 0       | 0       | 0        | 0 | 0        |
| 0        | 0        | 0        | 0       | 0        | 0       | 0       | 0       | 0       | 0        | 0 | 0        |
| 0        | 0        | 0.000102 | 0       | 0        | 0       | 0.0001  | 0       | 0.0002  | 0.000306 | 0 | 0        |
| 0        | 0        | 0        | 0       | 0        | 0       | 0       | 0       | 0       | 0        | 0 | 0        |
| 0        | 0        | 0        | 0       | 0        | 0       | 0       | 0       | 0       | 0        | 0 | 0        |
| 0        | 0        | 0.000102 | 0       | 0.000204 | 0       | 0       | 0       | 0       | 0        | 0 | 0        |
| 0        | 0        | 0        | 0       | 0        | 0       | 0       | 0       | 0       | 0.000102 | 0 | 0        |
| 0        | 0        | 0        | 0       | 0        | 0.0001  | 0       | 0       | 0       | 0        | 0 | 0        |
| 0        | 0        | 0        | 0.00011 | 0        | 0       | 0       | 0       | 0       | 0        | 0 | 0        |
| 0        | 0        | 0        | 0       | 0.000102 | 0       | 0.0001  | 0       | 0       | 0        | 0 | 0.003055 |
| 0.000214 | 0.000321 | 0.000107 | 0       | 0        | 0       | 0       | 0       | 0       | 0.012315 | 0 | 0.000107 |
| 0.001869 | 0        | 0        | 0       | 0.000104 | 0       | 0       | 0       | 0       | 0.010697 | 0 | 0        |
| 0        | 0        | 0        | 0       | 0        | 0       | 0.00021 | 0       | 0.0001  | 0        | 0 | 0.000104 |
| 0.000102 | 0        | 0        | 0       | 0        | 0       | 0       | 0       | 0       | 0        | 0 | 0        |
| 0        | 0        | 0.000102 | 0       | 0        | 0       | 0       | 0       | 0       | 0.029367 | 0 | 0        |
| 0.001729 | 0        | 0        | 0       | 0        | 0       | 0       | 0       | 0       | 0.000814 | 0 | 0.075468 |
| 0        | 0.000102 | 0        | 0       | 0        | 0       | 0       | 0       | 0       | 0        | 0 | 0        |
| 0        | 0        | 0        | 0       | 0        | 0       | 0       | 0       | 0       | 0        | 0 | 0        |
| 0        | 0        | 0.000105 | 0.0001  | 0        | 0       | 0       | 0.0001  | 0       | 0        | 0 | 0        |
| 0.000102 | 0        | 0.000102 | 0       | 0        | 0       | 0       | 0       | 0       | 0        | 0 | 0        |
| 0        | 0.00071  | 0        | 0       | 0        | 0       | 0       | 0       | 0       | 0        | 0 | 0.001217 |
| 0        | 0        | 0        | 0       | 0        | 0       | 0       | 0       | 0.00032 | 0.000421 | 0 | 0        |
| 0        | 0        | 0        | 0       | 0        | 0       | 0       | 0       | 0       | 0        | 0 | 0.0162   |
| 0        | 0        | 0        | 0       | 0        | 0       | 0.0001  | 0       | 0       | 0.000102 | 0 | 0        |
| 0        | 0        | 0        | 0       | 0        | 0       | 0       | 0       | 0       | 0        | 0 | 0        |
| 0        | 0        | 0        | 0       | 0        | 0       | 0       | 0       | 0       | 0.000315 | 0 | 0.000315 |
| 0        | 0        | 0        | 0       | 0        | 0       | 0       | 0       | 0.00011 | 0.005687 | 0 | 0        |
| 0        | 0        | 0.000208 | 0       | 0        | 0       | 0       | 0       | 0       | 0        | 0 | 0        |
| 0        | 0.00041  | 0        | 0       | 0        | 0       | 0.0001  | 0.00031 | 0.0001  | 0.020184 | 0 | 0.000102 |
| 0        | 0        | 0.000102 | 0       | 0.000203 | 0       | 0.0001  | 0.0001  | 0       | 0        | 0 | 0.004881 |
| 0.00021  | 0        | 0        | 0       | 0        | 0       | 0       | 0       | 0       | 0        | 0 | 0        |
| 0        | 0        | 0        | 0       | 0        | 0       | 0       | 0       | 0       | 0.000104 | 0 | 0        |
| 0        | 0        | 0        | 0       | 0        | 0       | 0       | 0       | 0       | 0        | 0 | 0        |
| 0        | 0        | 0.000302 | 0       | 0        | 0.0006  | 0       | 0.0001  | 0       | 0        | 0 | 0.030535 |
| 0        | 0.000101 | 0.000101 | 0       | 0        | 0.00263 | 0       | 0       | 0       | 0        | 0 | 0.097571 |
| 0        | 0        | 0        | 0       | 0        | 0       | 0       | 0       | 0       | 0.009163 | 0 | 0        |
| 0        | 0        | 0        | 0       | 0        | 0       | 0       | 0       | 0       | 0        | 0 | 0.000306 |
| 0        | 0        | 0        | 0       | 0        | 0       | 0       | 0       | 0       | 0        | 0 | 0        |
| 0        | 0        | 0        | 0       | 0        | 0.00021 | 0.00021 | 0.00052 | 0       | 0        | 0 | 0        |





| OTU_927  | OTU_968  | OTU_976 | OTU_1032  | OTU_1091  | OTU_1294  | cohort |
|----------|----------|---------|-----------|-----------|-----------|--------|
| 0        | 0        | 0       | 0.0001013 | 0         | 0.0036474 | H      |
| 0        | 0        | 0       | 0         | 0         | 0.0008219 | H      |
| 0        | 0        | 0       | 0         | 0         | 0.0010114 | H      |
| 0.000515 | 0        | 0       | 0         | 0.0001031 | 0.0003092 | H      |
| 0.000816 | 0.045288 | 0       | 0         | 0         | 0.000714  | H      |
| 0        | 0        | 0       | 0         | 0         | 0.0001053 | H      |
| 0.008719 | 0.066814 | 0       | 0         | 0.0004202 | 0.0002101 | H      |
| 0        | 0.000206 | 0       | 0         | 0         | 0.0003093 | H      |
| 0.001042 | 0.000104 | 0       | 0         | 0         | 0.0012504 | H      |
| 0        | 0        | 0       | 0         | 0         | 0         | H      |
| 0        | 0        | 0       | 0         | 0         | 0.00031   | H      |
| 0        | 0        | 0       | 0         | 0         | 0         | H      |
| 0.00062  | 0.172439 | 0       | 0         | 0.0001034 | 0.002998  | H      |
| 0        | 0        | 0       | 0         | 0         | 0         | H      |
| 0        | 0        | 0       | 0         | 0         | 0.0004065 | H      |
| 0.00053  | 0        | 0       | 0         | 0.0001059 | 0.0008474 | H      |
| 0.002135 | 0.000203 | 0       | 0         | 0.0007117 | 0.0007117 | H      |
| 0        | 0        | 0       | 0         | 0         | 0.0006046 | H      |
| 0        | 0        | 0       | 0         | 0         | 0.0003036 | H      |
| 0        | 0        | 0       | 0         | 0         | 0         | H      |
| 0.00032  | 0        | 0       | 0         | 0         | 0.0001065 | H      |
| 0.000926 | 0.000309 | 0       | 0         | 0         | 0.0016464 | H      |
| 0.00605  | 0        | 0       | 0         | 0.0003184 | 0.0001061 | H      |
| 0.002343 | 0.000408 | 0       | 0         | 0.0002038 | 0.0011207 | H      |
| 0        | 0.000104 | 0       | 0         | 0         | 0.0001039 | H      |
| 0        | 0        | 0       | 0.0002041 | 0         | 0         | H      |
| 0.000612 | 0        | 0       | 0.0004079 | 0         | 0         | H      |
| 0        | 0        | 0       | 0         | 0         | 0         | H      |
| 0        | 0        | 0       | 0         | 0         | 0.0001004 | H      |
| 0        | 0        | 0       | 0         | 0         | 0         | H      |
| 0        | 0.041693 | 0.00021 | 0         | 0         | 0.0001048 | H      |
| 0.001551 | 0        | 0       | 0         | 0.0013442 | 0.0008272 | H      |
| 0.000744 | 0.000106 | 0       | 0         | 0.0001062 | 0.0001062 | H      |
| 0.000308 | 0.000206 | 0       | 0         | 0.0001028 | 0         | H      |
| 0.001696 | 0        | 0       | 0         | 0         | 0         | H      |
| 0        | 0        | 0       | 0         | 0         | 0.0006095 | H      |
| 0        | 0        | 0       | 0.0002032 | 0         | 0.0004065 | H      |
| 0        | 0.000636 | 0       | 0         | 0         | 0         | H      |
| 0.000309 | 0.000103 | 0       | 0         | 0         | 0.0018568 | H      |
| 0        | 0        | 0       | 0         | 0         | 0.0001027 | H      |
| 0        | 0.000102 | 0       | 0         | 0         | 0         | H      |
| 0        | 0        | 0       | 0         | 0         | 0.0003125 | H      |
| 0        | 0        | 0       | 0         | 0         | 0         | H      |
| 0.000915 | 0.001526 | 0       | 0         | 0         | 0.0011189 | H      |
| 0.001332 | 0        | 0       | 0         | 0         | 0.0004099 | H      |
| 0.000308 | 0        | 0       | 0         | 0.0005137 | 0.0002055 | H      |
| 0        | 0        | 0       | 0         | 0         | 0.0010207 | H      |
| 0.00156  | 0        | 0       | 0         | 0.000208  | 0.0012482 | H      |
| 0.000941 | 0        | 0       | 0         | 0         | 0         | H      |
| 0        | 0        | 0       | 0         | 0         | 0.0007114 | H      |
| 0.001213 | 0        | 0       | 0         | 0         | 0.0006614 | H      |
| 0        | 0        | 0       | 0         | 0         | 0         | H      |

|          |          |          |           |           |           |     |
|----------|----------|----------|-----------|-----------|-----------|-----|
| 0        | 0.120304 | 0        | 0         | 0         | 0.0006159 | H   |
| 0.011301 | 0.000346 | 0        | 0         | 0.0002306 | 0         | H   |
| 0.003751 | 0.000455 | 0        | 0         | 0.0001137 | 0.0026145 | H   |
| 0.000104 | 0.000104 | 0        | 0.0001045 | 0         | 0.0001045 | H   |
| 0.001341 | 0        | 0        | 0         | 0.0013412 | 0.0008253 | H   |
| 0        | 0        | 0        | 0         | 0         | 0.0003057 | H   |
| 0        | 0        | 0        | 0         | 0         | 0         | H   |
| 0.000918 | 0.280396 | 0        | 0         | 0         | 0.000204  | H   |
| 0.001146 | 0.007502 | 0        | 0         | 0.0008336 | 0.0002084 | H   |
| 0.000411 | 0.004314 | 0        | 0         | 0         | 0.0002054 | H   |
| 0        | 0        | 0        | 0         | 0         | 0.0001042 | H   |
| 0        | 0        | 0        | 0         | 0         | 0         | H   |
| 0        | 0.000102 | 0        | 0.000509  | 0         | 0.0007126 | H   |
| 0.001521 | 0        | 0        | 0         | 0         | 0.0009775 | H   |
| 0.000649 | 0.159442 | 0        | 0         | 0         | 0.0005405 | H   |
| 0        | 0.000808 | 0        | 0.0004041 | 0         | 0.0003031 | H   |
| 0.000102 | 0        | 0        | 0         | 0.000408  | 0.000306  | H   |
| 0        | 0        | 0        | 0         | 0         | 0.000104  | H   |
| 0.000205 | 0        | 0        | 0         | 0         | 0.0013354 | H   |
| 0        | 0        | 0        | 0.0002038 | 0.0005094 | 0.0002038 | H   |
| 0        | 0.041688 | 0        | 0.0004087 | 0         | 0.0001022 | H   |
| 0        | 0        | 0        | 0         | 0         | 0.0004112 | H   |
| 0.000315 | 0        | 0        | 0         | 0.0001051 | 0.0018914 | H   |
| 0        | 0        | 0        | 0         | 0         | 0.0001018 | HCC |
| 0        | 0        | 0        | 0         | 0         | 0         | HCC |
| 0        | 0.003427 | 0        | 0.0004154 | 0         | 0.000727  | HCC |
| 0        | 0.024233 | 0        | 0.000208  | 0         | 0         | HCC |
| 0        | 0        | 0        | 0         | 0         | 0         | HCC |
| 0        | 0.000102 | 0        | 0         | 0         | 0         | HCC |
| 0        | 0.013019 | 0        | 0.0021359 | 0         | 0         | HCC |
| 0        | 0.09076  | 0        | 0         | 0         | 0         | HCC |
| 0.000106 | 0.018794 | 0        | 0         | 0         | 0.0006371 | HCC |
| 0        | 0        | 0        | 0.0001049 | 0         | 0.0011541 | HCC |
| 0        | 0.000102 | 0        | 0.0001023 | 0         | 0.0003069 | HCC |
| 0        | 0        | 0        | 0         | 0         | 0         | HCC |
| 0.000632 | 0.016853 | 0.000105 | 0         | 0         | 0         | HCC |
| 0        | 0.000509 | 0        | 0.0002038 | 0         | 0.0003057 | HCC |
| 0        | 0.000102 | 0        | 0         | 0         | 0         | HCC |
| 0        | 0        | 0        | 0         | 0         | 0.0019887 | HCC |
| 0.003678 | 0        | 0        | 0         | 0         | 0.0002102 | HCC |
| 0.01706  | 0.000316 | 0        | 0         | 0         | 0         | HCC |
| 0        | 0        | 0        | 0         | 0         | 0.0008302 | HCC |
| 0        | 0        | 0        | 0         | 0.0001025 | 0.0001025 | HCC |
| 0        | 0.049624 | 0        | 0         | 0         | 0.0010169 | HCC |
| 0        | 0        | 0        | 0         | 0         | 0         | HCC |
| 0        | 0        | 0        | 0         | 0         | 0         | HCC |
| 0        | 0        | 0        | 0         | 0         | 0.0003043 | HCC |
| 0.005606 | 0.006615 | 0.000112 | 0         | 0         | 0.0024666 | HCC |
| 0        | 0        | 0        | 0.0001008 | 0         | 0.0003023 | HCC |
| 0        | 0.000101 | 0        | 0         | 0         | 0.0003036 | HCC |
| 0        | 0        | 0        | 0.0001041 | 0         | 0         | HCC |
| 0.000204 | 0.177071 | 0.000102 | 0         | 0         | 0.000408  | HCC |
| 0        | 0.128273 | 0        | 0         | 0         | 0.0040451 | HCC |
| 0        | 0.000104 | 0        | 0.0074151 | 0         | 0         | HCC |

|          |          |          |           |           |           |     |
|----------|----------|----------|-----------|-----------|-----------|-----|
| 0        | 0.001668 | 0        | 0         | 0         | 0.000417  | HCC |
| 0.006881 | 0.029858 | 0.000233 | 0         | 0         | 0.0006998 | HCC |
| 0        | 0.105143 | 0        | 0.0005185 | 0         | 0         | HCC |
| 0        | 0        | 0        | 0.0002234 | 0         | 0.0004469 | HCC |
| 0        | 0        | 0        | 0         | 0         | 0         | HCC |
| 0        | 0.06015  | 0        | 0         | 0         | 0.0006148 | HCC |
| 0        | 0        | 0        | 0         | 0         | 0         | HCC |
| 0        | 0        | 0        | 0.0081564 | 0         | 0         | HCC |
| 0        | 0        | 0        | 0         | 0         | 0.0005032 | HCC |
| 0        | 0        | 0        | 0         | 0         | 0         | HCC |
| 0        | 0        | 0        | 0         | 0         | 0         | HCC |
| 0        | 0        | 0        | 0.0004185 | 0         | 0         | HCC |
| 0        | 0        | 0        | 0         | 0         | 0         | HCC |
| 0        | 0.000204 | 0        | 0.0004078 | 0         | 0.0003058 | HCC |
| 0        | 0        | 0        | 0         | 0         | 0         | HCC |
| 0        | 0        | 0        | 0         | 0         | 0         | HCC |
| 0        | 0        | 0        | 0.00071   | 0         | 0.0003043 | HCC |
| 0.00011  | 0.00011  | 0        | 0         | 0.0006615 | 0.0003308 | HCC |
| 0        | 0.064506 | 0        | 0         | 0         | 0.0001026 | HCC |
| 0        | 0.164308 | 0        | 0.0055385 | 0         | 0.0001026 | HCC |
| 0        | 0.017105 | 0        | 0.0001083 | 0         | 0.0031395 | HCC |
| 0.001643 | 0.133874 | 0        | 0.0017528 | 0         | 0.0002191 | HCC |
| 0.00021  | 0.152541 | 0.000105 | 0.0011524 | 0         | 0.0003143 | HCC |
| 0        | 0.00021  | 0        | 0         | 0         | 0.0002096 | HCC |
| 0        | 0        | 0        | 0         | 0         | 0.0015301 | HCC |
| 0.001523 | 0.120091 | 0        | 0         | 0         | 0.0002176 | HCC |
| 0        | 0        | 0        | 0.0001024 | 0         | 0         | HCC |
| 0        | 0        | 0        | 0         | 0         | 0         | HCC |
| 0.001662 | 0.220007 | 0        | 0         | 0         | 0.0003323 | HCC |
| 0        | 0        | 0        | 0         | 0         | 0         | HCC |
| 0        | 0        | 0        | 0         | 0         | 0.0001036 | HCC |
| 0.000552 | 0.000442 | 0.00011  | 0         | 0         | 0         | HCC |
| 0        | 0.038918 | 0.000929 | 0         | 0         | 0.0001032 | HCC |
| 0.008773 | 0        | 0        | 0         | 0         | 0         | HCC |
| 0        | 0.001653 | 0        | 0.0014466 | 0         | 0.0001033 | HCC |
| 0.002794 | 0        | 0        | 0.0003224 | 0         | 0.0007524 | HCC |
| 0        | 0.013163 | 0        | 0         | 0         | 0         | HCC |
| 0        | 0        | 0        | 0.0001053 | 0         | 0         | HCC |
| 0        | 0.02435  | 0        | 0         | 0         | 0.0008697 | HCC |
| 0        | 0        | 0        | 0         | 0         | 0         | HCC |
| 0        | 0        | 0        | 0.0001021 | 0.0001021 | 0.0029595 | HCC |
| 0        | 0        | 0        | 0.0007289 | 0         | 0         | HCC |
| 0.002543 | 0        | 0        | 0.000106  | 0.000106  | 0.0006359 | HCC |
| 0        | 0.000105 | 0        | 0.0027185 | 0         | 0.0006274 | HCC |
| 0        | 0        | 0        | 0.0002043 | 0         | 0.0104209 | ELC |
| 0        | 0        | 0        | 0         | 0         | 0.0001014 | ELC |
| 0.003417 | 0        | 0        | 0         | 0.0008817 | 0.0004409 | ELC |
| 0        | 0.18493  | 0        | 0         | 0         | 0.0009252 | ELC |
| 0        | 0        | 0        | 0         | 0         | 0         | ELC |
| 0        | 0        | 0        | 0         | 0         | 0         | ELC |
| 0.00021  | 0.000736 | 0        | 0         | 0         | 0.0001052 | ELC |
| 0        | 0        | 0        | 0         | 0         | 0         | ELC |
| 0        | 0        | 0        | 0         | 0         | 0.001787  | ELC |
| 0        | 0.046622 | 0        | 0         | 0         | 0.0002023 | ELC |

|          |          |          |           |           |           |     |
|----------|----------|----------|-----------|-----------|-----------|-----|
| 0.003391 | 0.161821 | 0        | 0         | 0         | 0.0005137 | ELC |
| 0        | 0        | 0        | 0.0003045 | 0         | 0.0014212 | ELC |
| 0        | 0        | 0        | 0         | 0         | 0.0006055 | ELC |
| 0        | 0        | 0        | 0         | 0.0004113 | 0.0005141 | ELC |
| 0        | 0        | 0        | 0         | 0         | 0         | ELC |
| 0        | 0.000105 | 0        | 0         | 0.0001046 | 0.0007323 | ELC |
| 0.000638 | 0.13906  | 0        | 0.0002126 | 0         | 0.0003189 | ELC |
| 0        | 0        | 0        | 0         | 0         | 0         | ELC |
| 0        | 0        | 0        | 0         | 0         | 0         | ELC |
| 0        | 0        | 0        | 0         | 0         | 0         | ELC |
| 0        | 0        | 0        | 0.0010244 | 0         | 0.0004098 | ELC |
| 0.001149 | 0        | 0        | 0.0013576 | 0.0001044 | 0.0012531 | ELC |
| 0        | 0        | 0        | 0         | 0         | 0.0006246 | ELC |
| 0        | 0        | 0        | 0         | 0         | 0.0047341 | ELC |
| 0.000103 | 0.00062  | 0.000103 | 0.0003101 | 0         | 0.0008269 | ELC |
| 0        | 0.2143   | 0        | 0         | 0         | 0         | ELC |
| 0        | 0        | 0        | 0         | 0         | 0.0012259 | ELC |
| 0.001845 | 0        | 0        | 0         | 0         | 0.0004613 | ELC |
| 0        | 0.001176 | 0        | 0.0003206 | 0         | 0.0001069 | ELC |
| 0.001542 | 0        | 0        | 0.0001028 | 0         | 0.0011306 | ELC |
| 0        | 0.107508 | 0        | 0.0003069 | 0         | 0.0008183 | ELC |
| 0.003387 | 0        | 0        | 0         | 0         | 0.0001026 | ELC |
| 0        | 0        | 0        | 0.0004022 | 0         | 0         | ELC |
| 0        | 0        | 0        | 0         | 0         | 0.0001004 | ELC |
| 0        | 0.000924 | 0        | 0         | 0         | 0         | ELC |
| 0        | 0.000303 | 0        | 0         | 0         | 0         | ELC |
| 0        | 0.000403 | 0        | 0.0001007 | 0.0001007 | 0.0004027 | ELC |
| 0        | 0        | 0        | 0.0003037 | 0         | 0.0003037 | ELC |
| 0.00107  | 0        | 0        | 0         | 0         | 0.000107  | ELC |
| 0        | 0.033883 | 0        | 0.0002047 | 0         | 0.0002047 | ELC |

**Table S10 The corresponding bacterial genera of the 30 OTUs markers**

|          |                                                                                          |     |
|----------|------------------------------------------------------------------------------------------|-----|
| OTU_10   | Bacteria;Bacteroidetes;Bacteroidia;Bacteroidales;Bacteroidaceae;Bacteroides              | 1   |
| OTU_12   | Bacteria;Firmicutes;Clostridia;Clostridiales;Ruminococcaceae;Clostridium IV              | 0.7 |
| OTU_28   | Bacteria;Firmicutes;Negativicutes;Selenomonadales;Veillonellaceae;Dialister              | 1   |
| OTU_57   | Bacteria;Firmicutes;Clostridia;Clostridiales;Ruminococcaceae                             | 0.7 |
| OTU_58   | Bacteria;Firmicutes;Clostridia;Clostridiales;Ruminococcaceae                             | 1   |
| OTU_63   | Bacteria;Proteobacteria;Gammaproteobacteria;Enterobacteriales;Enterobacteriaceae         | 1   |
| OTU_78   | Bacteria;Proteobacteria;Betaproteobacteria;Burkholderiales;Sutterellaceae;Sutterella     | 1   |
| OTU_86   | Bacteria;Firmicutes;Clostridia;Clostridiales;Lachnospiraceae;Lachnospiraceae_incertae_s  | 0.6 |
| OTU_87   | Bacteria;Actinobacteria;Actinobacteria;Coriobacteriales;Coriobacteriaceae;Collinsella    | 1   |
| OTU_96   | Bacteria;Bacteroidetes;Bacteroidia;Bacteroidales;Prevotellaceae;Prevotella               | 1   |
| OTU_97   | Bacteria;Firmicutes;Clostridia;Clostridiales;Lachnospiraceae;Blautia                     | 1   |
| OTU_128  | Bacteria;Firmicutes;Clostridia;Clostridiales;Ruminococcaceae;Butyrivibrio                | 1   |
| OTU_136  | Bacteria;Firmicutes;Bacilli;Lactobacillales;Lactobacillaceae;Lactobacillus               | 1   |
| OTU_209  | Bacteria;Actinobacteria;Actinobacteria;Bifidobacteriales;Bifidobacteriaceae;Bifidobacter | 1   |
| OTU_285  | Bacteria;TM7;TM7_genera_incertae_sedis;TM7_genera_incertae_sedis;TM7_genera_in           | 1   |
| OTU_291  | Bacteria;Firmicutes;Clostridia;Clostridiales                                             | 0.9 |
| OTU_310  | Bacteria;Firmicutes;Clostridia;Clostridiales;Ruminococcaceae                             | 1   |
| OTU_372  | Bacteria;Firmicutes;Negativicutes;Selenomonadales;Acidaminococcaceae;Acidaminococ        | 1   |
| OTU_373  | Bacteria;Fusobacteria;Fusobacteria;Fusobacteriales;Fusobacteriaceae;Fusobacterium        | 1   |
| OTU_427  | Bacteria;Proteobacteria;Gammaproteobacteria;Pasteurellales;Pasteurellaceae;Aggregatib    | 1   |
| OTU_451  | Bacteria;Actinobacteria;Actinobacteria;Actinomycetales;Micrococcaceae;Rothia             | 1   |
| OTU_624  | Bacteria;Bacteroidetes;Bacteroidia;Bacteroidales;Rikenellaceae;Alistipes                 | 1   |
| OTU_664  | Bacteria;Proteobacteria;Alphaproteobacteria;Caulobacteriales;Caulobacteraceae;Brevund    | 1   |
| OTU_748  | Bacteria;Firmicutes;Negativicutes;Selenomonadales;Veillonellaceae;Megamonas              | 1   |
| OTU_927  | Bacteria;Firmicutes;Clostridia;Clostridiales;Ruminococcaceae                             | 1   |
| OTU_968  | Bacteria;Bacteroidetes;Bacteroidia;Bacteroidales;Prevotellaceae;Prevotella               | 1   |
| OTU_976  | Bacteria;Bacteroidetes;Bacteroidia;Bacteroidales;Prevotellaceae;Paraprevotella           | 0.5 |
| OTU_1032 | Bacteria;Proteobacteria;Gammaproteobacteria;Enterobacteriales;Enterobacteriaceae;Klebs   | 0.7 |
| OTU_1091 | Bacteria;Firmicutes;Clostridia;Clostridiales;Ruminococcaceae                             | 0.9 |
| OTU_1294 | Bacteria;Firmicutes;Clostridia;Clostridiales;Ruminococcaceae;Faecalibacterium            | 1   |



**Table S11 POD value in the discovery cohort**

| sample  | POD      | cohort | POD with moisture |
|---------|----------|--------|-------------------|
| H_20    | 0.125683 | nonHCC | 0.153             |
| H_N204  | 0.128205 | nonHCC | 0.162             |
| H_37    | 0.154286 | nonHCC | 0.219             |
| H_N68   | 0.154286 | nonHCC | 0.137             |
| H_44    | 0.269608 | nonHCC | 0.317             |
| H_N105  | 0.315476 | nonHCC | 0.232             |
| H_34    | 0.298851 | nonHCC | 0.174             |
| H_N39   | 0.554286 | nonHCC | 0.524             |
| H_52    | 0.297872 | nonHCC | 0.353             |
| H_17    | 0.210811 | nonHCC | 0.242             |
| H_N50   | 0.298969 | nonHCC | 0.189             |
| H_73    | 0.212644 | nonHCC | 0.318             |
| H_22    | 0.287356 | nonHCC | 0.278             |
| H_8     | 0.079365 | nonHCC | 0.147             |
| H_71    | 0.206186 | nonHCC | 0.212             |
| H_N91   | 0.123656 | nonHCC | 0.106             |
| H_24    | 0.077348 | nonHCC | 0.081             |
| H_N76   | 0.427807 | nonHCC | 0.357             |
| H_54    | 0.109948 | nonHCC | 0.085             |
| H_N181  | 0.071429 | nonHCC | 0.108             |
| H_N1212 | 0.050633 | nonHCC | 0.049             |
| H_15    | 0.167539 | nonHCC | 0.198             |
| H_46    | 0.2      | nonHCC | 0.251             |
| H_N132  | 0.125    | nonHCC | 0.262             |
| H_N260  | 0.133663 | nonHCC | 0.128             |
| H_70    | 0.375661 | nonHCC | 0.4               |
| H_27    | 0.22043  | nonHCC | 0.183             |
| H_N57   | 0.090909 | nonHCC | 0.191             |
| H_N72   | 0.333333 | nonHCC | 0.422             |
| H_77    | 0.151515 | nonHCC | 0.174             |
| H_N197  | 0.452261 | nonHCC | 0.59              |
| H_6     | 0.333333 | nonHCC | 0.333             |
| H_N55   | 0.052632 | nonHCC | 0.05              |
| H_64    | 0.234694 | nonHCC | 0.296             |
| H_63    | 0.25     | nonHCC | 0.26              |
| H_53    | 0.165746 | nonHCC | 0.085             |
| H_5     | 0.091398 | nonHCC | 0.201             |
| H_N264  | 0.473958 | nonHCC | 0.417             |
| H_N1022 | 0.05914  | nonHCC | 0.073             |
| H_76    | 0.067797 | nonHCC | 0.053             |
| H_40    | 0.157895 | nonHCC | 0.264             |
| H_N145  | 0.036842 | nonHCC | 0.116             |
| H_N258  | 0.105556 | nonHCC | 0.123             |
| H_14    | 0.327778 | nonHCC | 0.443             |
| H_13    | 0.121951 | nonHCC | 0.186             |
| H_55    | 0.027778 | nonHCC | 0.021             |

|         |          |        |       |
|---------|----------|--------|-------|
| H_25    | 0.207101 | nonHCC | 0.254 |
| H_N109  | 0.093264 | nonHCC | 0.181 |
| H_61    | 0.489583 | nonHCC | 0.447 |
| H_28    | 0.17801  | nonHCC | 0.221 |
| H_N177  | 0.322034 | nonHCC | 0.325 |
| H_9     | 0.435897 | nonHCC | 0.468 |
| H_33    | 0.298969 | nonHCC | 0.353 |
| H_26    | 0.347826 | nonHCC | 0.382 |
| H_N40   | 0.220339 | nonHCC | 0.266 |
| H_N121  | 0.146067 | nonHCC | 0.12  |
| H_23    | 0.384615 | nonHCC | 0.365 |
| H_N56   | 0.776471 | nonHCC | 0.699 |
| H_N164  | 0.187845 | nonHCC | 0.204 |
| H_12    | 0.287293 | nonHCC | 0.398 |
| H_N75   | 0.157895 | nonHCC | 0.191 |
| H_47    | 0.497462 | nonHCC | 0.469 |
| H_N84   | 0.086022 | nonHCC | 0.168 |
| H_42    | 0.432292 | nonHCC | 0.437 |
| H_N9    | 0.235294 | nonHCC | 0.231 |
| H_N52   | 0.135294 | nonHCC | 0.197 |
| H_62    | 0.301775 | nonHCC | 0.197 |
| H_1     | 0.17561  | nonHCC | 0.231 |
| H_N111  | 0.448087 | nonHCC | 0.319 |
| H_N54   | 0.306452 | nonHCC | 0.318 |
| H_N102  | 0.098361 | nonHCC | 0.207 |
| H_4     | 0.303867 | nonHCC | 0.252 |
| H_36    | 0.512195 | nonHCC | 0.511 |
| H_16    | 0.5      | nonHCC | 0.495 |
| H_69    | 0.11236  | nonHCC | 0.148 |
| ELC_31  | 0.5625   | nonHCC | 0.47  |
| ELC_19  | 0.395939 | nonHCC | 0.3   |
| ELC_44  | 0.389222 | nonHCC | 0.394 |
| ELC_56  | 0.285714 | nonHCC | 0.282 |
| ELC_63  | 0.166667 | nonHCC | 0.192 |
| ELC_47  | 0.52071  | nonHCC | 0.479 |
| ELC_20  | 0.552326 | nonHCC | 0.486 |
| ELC_43  | 0.317708 | nonHCC | 0.242 |
| ELC_13A | 0.364162 | nonHCC | 0.447 |
| ELC_33  | 0.507772 | nonHCC | 0.448 |
| ELC_40  | 0.301587 | nonHCC | 0.356 |
| ELC_22  | 0.456522 | nonHCC | 0.561 |
| ELC_18  | 0.1125   | nonHCC | 0.212 |
| ELC_61  | 0.276923 | nonHCC | 0.232 |
| ELC_24  | 0.72     | nonHCC | 0.513 |
| ELC_29  | 0.46875  | nonHCC | 0.588 |
| ELC_42  | 0.510417 | nonHCC | 0.462 |
| ELC_17  | 0.575916 | nonHCC | 0.452 |
| ELC_38  | 0.430108 | nonHCC | 0.39  |

|          |          |        |       |
|----------|----------|--------|-------|
| ELC_7A   | 0.524324 | nonHCC | 0.666 |
| ELC_58   | 0.533708 | nonHCC | 0.534 |
| ELC_46   | 0.472637 | nonHCC | 0.465 |
| ELC_25   | 0.277778 | nonHCC | 0.248 |
| ELC_51   | 0.475962 | nonHCC | 0.438 |
| ELC_117A | 0.4      | nonHCC | 0.427 |
| ELC_21   | 0.598901 | nonHCC | 0.725 |
| ELC_28   | 0.360656 | nonHCC | 0.37  |
| ELC_37   | 0.136364 | nonHCC | 0.122 |
| ELC_115A | 0.508108 | nonHCC | 0.493 |
| ELC_48   | 0.502703 | nonHCC | 0.402 |
| ELC_45   | 0.557377 | nonHCC | 0.564 |
| ELC_23   | 0.370787 | nonHCC | 0.247 |
| ELC_41   | 0.694444 | nonHCC | 0.774 |
| ELC_35   | 0.171429 | nonHCC | 0.255 |
| ELC_8A   | 0.34104  | nonHCC | 0.397 |
| ELC_65A  | 0.674157 | nonHCC | 0.585 |
| ELC_52   | 0.351351 | nonHCC | 0.212 |
| ELC_11   | 0.337278 | nonHCC | 0.27  |
| ELC_36   | 0.231707 | nonHCC | 0.179 |
| ELC_30   | 0.366492 | nonHCC | 0.346 |
| C_82     | 0.365079 | HCC    | 0.427 |
| C_62     | 0.662722 | HCC    | 0.623 |
| C_60     | 0.561497 | HCC    | 0.477 |
| C_32     | 0.604167 | HCC    | 0.622 |
| C_HCC20  | 0.38172  | HCC    | 0.416 |
| C_11     | 0.5      | HCC    | 0.423 |
| C_75     | 0.75     | HCC    | 0.778 |
| C_61     | 0.534759 | HCC    | 0.456 |
| C_88     | 0.508197 | HCC    | 0.496 |
| C_18     | 0.302857 | HCC    | 0.272 |
| C_HCC17  | 0.272727 | HCC    | 0.264 |
| C_HCC17  | 0.748634 | HCC    | 0.673 |
| C_94     | 0.681564 | HCC    | 0.657 |
| C_36     | 0.300546 | HCC    | 0.406 |
| C_HCC22  | 0.505495 | HCC    | 0.54  |
| C_12     | 0.168367 | HCC    | 0.176 |
| C_101    | 0.393258 | HCC    | 0.389 |
| C_86     | 0.632768 | HCC    | 0.653 |
| C_106    | 0.362069 | HCC    | 0.26  |
| C_HCC20  | 0.60119  | HCC    | 0.647 |
| C_54     | 0.360947 | HCC    | 0.346 |
| C_69     | 0.651741 | HCC    | 0.59  |
| C_85     | 0.394595 | HCC    | 0.362 |
| C_73     | 0.244681 | HCC    | 0.32  |
| C_64     | 0.336842 | HCC    | 0.351 |
| C_HCC23  | 0.597884 | HCC    | 0.522 |
| C_HCC16  | 0.365714 | HCC    | 0.277 |

|                  |          |     |       |
|------------------|----------|-----|-------|
| C_28             | 0.374302 | HCC | 0.389 |
| C_46             | 0.35625  | HCC | 0.365 |
| C_HCC22:0.302564 |          | HCC | 0.303 |
| C_89             | 0.796407 | HCC | 0.754 |
| C_14             | 0.751323 | HCC | 0.609 |
| C_20             | 0.646409 | HCC | 0.615 |
| C_90             | 0.674877 | HCC | 0.595 |
| C_HCC17:0.402299 |          | HCC | 0.384 |
| C_19             | 0.6      | HCC | 0.655 |
| C_7              | 0.471264 | HCC | 0.574 |
| C_HCC21:0.548571 |          | HCC | 0.492 |
| C_HCC22:0.591954 |          | HCC | 0.622 |
| C_HCC16:0.5      |          | HCC | 0.537 |
| C_HCC23:0.701031 |          | HCC | 0.643 |
| C_102            | 0.621622 | HCC | 0.636 |
| C_13             | 0.580838 | HCC | 0.498 |
| C_83             | 0.610169 | HCC | 0.528 |
| C_74             | 0.668394 | HCC | 0.629 |
| C_38             | 0.401042 | HCC | 0.395 |
| C_109            | 0.701657 | HCC | 0.668 |
| C_49             | 0.469945 | HCC | 0.406 |
| C_47             | 0.194595 | HCC | 0.202 |
| C_39             | 0.594059 | HCC | 0.637 |
| C_44             | 0.709184 | HCC | 0.664 |
| C_34             | 0.45679  | HCC | 0.556 |
| C_24             | 0.513514 | HCC | 0.492 |
| C_10             | 0.637755 | HCC | 0.658 |
| C_6              | 0.469274 | HCC | 0.523 |
| C_58             | 0.391061 | HCC | 0.372 |
| C_53             | 0.414365 | HCC | 0.372 |
| C_68             | 0.494624 | HCC | 0.504 |
| C_23             | 0.44086  | HCC | 0.383 |
| C_81             | 0.530303 | HCC | 0.457 |
| C_51             | 0.446237 | HCC | 0.405 |
| C_HCC18:0.079545 |          | HCC | 0.092 |
| C_95             | 0.497436 | HCC | 0.487 |
| C_HCC17:0.346591 |          | HCC | 0.387 |
| C_HCC20:0.335025 |          | HCC | 0.291 |
| C_27             | 0.536082 | HCC | 0.468 |
| C_HCC17:0.555556 |          | HCC | 0.472 |
| C_77             | 0.572139 | HCC | 0.46  |
| C_63             | 0.647399 | HCC | 0.541 |
| C_105            | 0.601156 | HCC | 0.589 |
| C_91             | 0.521277 | HCC | 0.551 |
| C_29             | 0.594203 | HCC | 0.69  |
| C_HCC23:0.647959 |          | HCC | 0.725 |
| C_22             | 0.267045 | HCC | 0.165 |
| C_41             | 0.642424 | HCC | 0.584 |

**Table S12 POD value in the validation cohort and independent diagnosis**

| sample   | cohort          | POD   | label     | POD with moisture |
|----------|-----------------|-------|-----------|-------------------|
| C_104    | HCC_without_cir | 0.31  | early HCC | 0.2768            |
| C_40     | HCC_without_cir | 0.326 | early HCC | 0.3184            |
| C_43     | HCC_without_cir | 0.642 | early HCC | 0.616             |
| C_48     | HCC_without_cir | 0.456 | early HCC | 0.4664            |
| C_57     | HCC_without_cir | 0.26  | early HCC | 0.2768            |
| C_67     | HCC_without_cir | 0.474 | early HCC | 0.408             |
| C_HCC214 | HCC_without_cir | 0.666 | early HCC | 0.6414            |
| C_HCC218 | HCC_without_cir | 0.504 | early HCC | 0.4598            |
| C_HCC228 | HCC_without_cir | 0.164 | early HCC | 0.145             |
| C_HCC233 | HCC_without_cir | 0.428 | early HCC | 0.4226            |
| C_15     | HCC_without_cir | 0.584 | early HCC | 0.498             |
| C_2      | HCC_without_cir | 0.34  | early HCC | 0.3006            |
| C_80     | HCC_without_cir | 0.434 | early HCC | 0.4012            |
| C_84     | HCC_without_cir | 0.48  | early HCC | 0.4726            |
| C_87     | HCC_without_cir | 0.618 | early HCC | 0.5534            |
| C_93     | HCC_without_cir | 0.372 | early HCC | 0.3444            |
| C_HCC195 | HCC_without_cir | 0.258 | early HCC | 0.276             |
| C_HCC237 | HCC_without_cir | 0.46  | early HCC | 0.4194            |
| C_HCC238 | HCC_without_cir | 0.152 | early HCC | 0.1958            |
| H_75     | H               | 0.088 | H         | 0.0972            |
| H_35     | H               | 0.214 | H         | 0.2358            |
| H_N64    | H               | 0.2   | H         | 0.2264            |
| H_N7     | H               | 0.17  | H         | 0.1722            |
| H_60     | H               | 0.064 | H         | 0.0796            |
| H_2      | H               | 0.304 | H         | 0.188             |
| H_68     | H               | 0.512 | H         | 0.4424            |
| H_N259   | H               | 0.496 | H         | 0.414             |
| H_10     | H               | 0.466 | H         | 0.4544            |
| H_N261   | H               | 0.282 | H         | 0.2998            |
| H_39     | H               | 0.152 | H         | 0.1716            |
| H_56     | H               | 0.094 | H         | 0.0878            |
| H_N171   | H               | 0.232 | H         | 0.24              |
| H_N58    | H               | 0.528 | H         | 0.5186            |
| H_18     | H               | 0.284 | H         | 0.2676            |
| H_N49    | H               | 0.214 | H         | 0.1572            |
| H_38     | H               | 0.076 | H         | 0.0846            |
| H_N160   | H               | 0.414 | H         | 0.3524            |
| H_29     | H               | 0.118 | H         | 0.1296            |
| H_66     | H               | 0.488 | H         | 0.4808            |
| H_19     | H               | 0.322 | H         | 0.2266            |
| H_N86    | H               | 0.188 | H         | 0.205             |
| H_N21    | H               | 0.6   | H         | 0.5496            |
| H_51     | H               | 0.436 | H         | 0.4176            |
| H_67     | H               | 0.042 | H         | 0.102             |
| H_N63    | H               | 0.46  | H         | 0.4636            |
| H_7      | H               | 0.232 | H         | 0.2432            |

|          |      |       |      |        |
|----------|------|-------|------|--------|
| H_72     | H    | 0.366 | H    | 0.3544 |
| H_N176   | H    | 0.13  | H    | 0.1674 |
| H_32     | H    | 0.138 | H    | 0.198  |
| H_N70    | H    | 0.338 | H    | 0.3004 |
| H_59     | H    | 0.42  | H    | 0.3636 |
| H_N47    | H    | 0.434 | H    | 0.4388 |
| H_58     | H    | 0.104 | H    | 0.113  |
| H_N65    | H    | 0.154 | H    | 0.1936 |
| H_31     | H    | 0.088 | H    | 0.1176 |
| H_11     | H    | 0.108 | H    | 0.1504 |
| H_21     | H    | 0.58  | H    | 0.4764 |
| H_N97    | H    | 0.168 | H    | 0.1736 |
| H_65     | H    | 0.326 | H    | 0.3458 |
| H_N101   | H    | 0.58  | H    | 0.5618 |
| H_41     | H    | 0.328 | H    | 0.3328 |
| H_3      | H    | 0.494 | H    | 0.48   |
| H_N12231 | H    | 0.476 | H    | 0.461  |
| H_N104   | H    | 0.466 | H    | 0.4442 |
| C_103    | aHCC | 0.634 | aHCC | 0.605  |
| C_108    | aHCC | 0.462 | aHCC | 0.4046 |
| C_110    | aHCC | 0.528 | aHCC | 0.4756 |
| C_21     | aHCC | 0.404 | aHCC | 0.3822 |
| C_26     | aHCC | 0.626 | aHCC | 0.5888 |
| C_33     | aHCC | 0.44  | aHCC | 0.4618 |
| C_42     | aHCC | 0.818 | aHCC | 0.799  |
| C_52     | aHCC | 0.594 | aHCC | 0.5656 |
| C_55     | aHCC | 0.552 | aHCC | 0.506  |
| C_56     | aHCC | 0.502 | aHCC | 0.5074 |
| C_72     | aHCC | 0.456 | aHCC | 0.4462 |
| C_8      | aHCC | 0.246 | aHCC | 0.246  |
| C_98     | aHCC | 0.396 | aHCC | 0.4222 |
| C_HCC165 | aHCC | 0.458 | aHCC | 0.4726 |
| C_HCC177 | aHCC | 0.486 | aHCC | 0.4518 |
| C_HCC186 | aHCC | 0.334 | aHCC | 0.2954 |
| C_HCC188 | aHCC | 0.376 | aHCC | 0.391  |
| C_HCC191 | aHCC | 0.556 | aHCC | 0.5252 |
| C_HCC194 | aHCC | 0.686 | aHCC | 0.6616 |
| C_HCC198 | aHCC | 0.526 | aHCC | 0.4642 |
| C_HCC211 | aHCC | 0.524 | aHCC | 0.5832 |
| C_HCC212 | aHCC | 0.484 | aHCC | 0.4418 |
| C_HCC219 | aHCC | 0.648 | aHCC | 0.6048 |
| C_HCC225 | aHCC | 0.766 | aHCC | 0.6886 |
| C_HCC227 | aHCC | 0.356 | aHCC | 0.3856 |
| C_HCC229 | aHCC | 0.51  | aHCC | 0.499  |
| C_HCC234 | aHCC | 0.51  | aHCC | 0.5268 |
| C_HCC240 | aHCC | 0.352 | aHCC | 0.3362 |
| C_HCC241 | aHCC | 0.316 | aHCC | 0.3118 |
| C_HCC276 | aHCC | 0.356 | aHCC | 0.4118 |

|          |              |       |           |        |
|----------|--------------|-------|-----------|--------|
| C_16     | aHCC         | 0.684 | aHCC      | 0.6658 |
| C_17     | aHCC         | 0.368 | aHCC      | 0.4366 |
| C_25     | aHCC         | 0.14  | aHCC      | 0.1646 |
| C_3      | aHCC         | 0.39  | aHCC      | 0.3752 |
| C_30     | aHCC         | 0.624 | aHCC      | 0.5652 |
| C_4      | aHCC         | 0.58  | aHCC      | 0.4906 |
| C_45     | aHCC         | 0.4   | aHCC      | 0.43   |
| C_50     | aHCC         | 0.474 | aHCC      | 0.4566 |
| C_59     | aHCC         | 0.662 | aHCC      | 0.6138 |
| C_71     | aHCC         | 0.232 | aHCC      | 0.2652 |
| C_79     | aHCC         | 0.392 | aHCC      | 0.4068 |
| C_9      | aHCC         | 0.312 | aHCC      | 0.3148 |
| C_92     | aHCC         | 0.712 | aHCC      | 0.6906 |
| C_HCC174 | aHCC         | 0.51  | aHCC      | 0.4832 |
| C_HCC236 | aHCC         | 0.54  | aHCC      | 0.5356 |
| H_48     | H            | 0.106 | H         | 0.1482 |
| H_N69    | H            | 0.232 | H         | 0.2666 |
| H_N5     | H            | 0.028 | H         | 0.0618 |
| H_57     | H            | 0.158 | H         | 0.1854 |
| H_49     | H            | 0.04  | H         | 0.0554 |
| H_43     | H            | 0.352 | H         | 0.3748 |
| H_45     | H            | 0.094 | H         | 0.1114 |
| H_N16    | H            | 0.268 | H         | 0.3062 |
| H_30     | H            | 0.314 | H         | 0.2878 |
| H_74     | H            | 0.298 | H         | 0.2748 |
| H_50     | H            | 0.432 | H         | 0.4424 |
| C_65     | HCC_with_cir | 0.656 | early HCC | 0.6228 |
| C_31     | HCC_with_cir | 0.304 | early HCC | 0.3366 |
| C_99     | HCC_with_cir | 0.768 | early HCC | 0.7298 |
| C_76     | HCC_with_cir | 0.318 | early HCC | 0.3342 |
| C_37     | HCC_with_cir | 0.306 | early HCC | 0.2296 |
| C_HCC201 | HCC_with_cir | 0.4   | early HCC | 0.3776 |
| C_66     | HCC_with_cir | 0.268 | early HCC | 0.273  |
| C_HCC172 | HCC_with_cir | 0.324 | early HCC | 0.3684 |
| C_78     | HCC_with_cir | 0.396 | early HCC | 0.3456 |
| C_107    | HCC_with_cir | 0.742 | early HCC | 0.6166 |
| C_35     | HCC_with_cir | 0.38  | early HCC | 0.396  |
| HN_1     | Zhengzhou    | 0.486 | Zhengzhou | 0.4612 |
| HN_10    | Zhengzhou    | 0.188 | Zhengzhou | 0.1858 |
| HN_2     | Zhengzhou    | 0.422 | Zhengzhou | 0.5008 |
| HN_3     | Zhengzhou    | 0.384 | Zhengzhou | 0.4338 |
| HN_4     | Zhengzhou    | 0.804 | Zhengzhou | 0.7456 |
| HN_5     | Zhengzhou    | 0.73  | Zhengzhou | 0.6572 |
| HN_6     | Zhengzhou    | 0.138 | Zhengzhou | 0.154  |
| HN_7     | Zhengzhou    | 0.528 | Zhengzhou | 0.4986 |
| HN_8     | Zhengzhou    | 0.48  | Zhengzhou | 0.4646 |
| HN_9     | Zhengzhou    | 0.526 | Zhengzhou | 0.513  |
| XJ_1     | Xinjiang     | 0.386 | Xinjiang  | 0.3832 |

|       |           |       |           |        |
|-------|-----------|-------|-----------|--------|
| XJ_10 | Xinjiang  | 0.364 | Xinjiang  | 0.3816 |
| XJ_11 | Xinjiang  | 0.614 | Xinjiang  | 0.6076 |
| XJ_12 | Xinjiang  | 0.63  | Xinjiang  | 0.5722 |
| XJ_13 | Xinjiang  | 0.464 | Xinjiang  | 0.4358 |
| XJ_14 | Xinjiang  | 0.69  | Xinjiang  | 0.6914 |
| XJ_15 | Xinjiang  | 0.514 | Xinjiang  | 0.5294 |
| XJ_16 | Xinjiang  | 0.484 | Xinjiang  | 0.4844 |
| XJ_17 | Xinjiang  | 0.792 | Xinjiang  | 0.735  |
| XJ_18 | Xinjiang  | 0.426 | Xinjiang  | 0.418  |
| XJ_2  | Xinjiang  | 0.684 | Xinjiang  | 0.643  |
| XJ_3  | Xinjiang  | 0.762 | Xinjiang  | 0.7186 |
| XJ_4  | Xinjiang  | 0.156 | Xinjiang  | 0.1616 |
| XJ_5  | Xinjiang  | 0.506 | Xinjiang  | 0.4726 |
| XJ_6  | Xinjiang  | 0.43  | Xinjiang  | 0.4024 |
| XJ_7  | Xinjiang  | 0.174 | Xinjiang  | 0.1582 |
| XJ_8  | Xinjiang  | 0.4   | Xinjiang  | 0.399  |
| XJ_9  | Xinjiang  | 0.302 | Xinjiang  | 0.2894 |
| ZD_1  | Zhengzhou | 0.558 | Zhengzhou | 0.588  |
| ZD_10 | Zhengzhou | 0.446 | Zhengzhou | 0.4142 |
| ZD_11 | Zhengzhou | 0.354 | Zhengzhou | 0.3558 |
| ZD_12 | Zhengzhou | 0.674 | Zhengzhou | 0.6376 |
| ZD_13 | Zhengzhou | 0.644 | Zhengzhou | 0.6062 |
| ZD_14 | Zhengzhou | 0.414 | Zhengzhou | 0.4008 |
| ZD_16 | Zhengzhou | 0.594 | Zhengzhou | 0.5628 |
| ZD_17 | Zhengzhou | 0.668 | Zhengzhou | 0.6838 |
| ZD_18 | Zhengzhou | 0.468 | Zhengzhou | 0.4722 |
| ZD_19 | Zhengzhou | 0.598 | Zhengzhou | 0.6164 |
| ZD_2  | Zhengzhou | 0.34  | Zhengzhou | 0.3628 |
| ZD_20 | Zhengzhou | 0.38  | Zhengzhou | 0.366  |
| ZD_21 | Zhengzhou | 0.618 | Zhengzhou | 0.6104 |
| ZD_22 | Zhengzhou | 0.256 | Zhengzhou | 0.2812 |
| ZD_23 | Zhengzhou | 0.508 | Zhengzhou | 0.5062 |
| ZD_24 | Zhengzhou | 0.56  | Zhengzhou | 0.5094 |
| ZD_25 | Zhengzhou | 0.388 | Zhengzhou | 0.3858 |
| ZD_26 | Zhengzhou | 0.468 | Zhengzhou | 0.463  |
| ZD_27 | Zhengzhou | 0.488 | Zhengzhou | 0.4754 |
| ZD_28 | Zhengzhou | 0.366 | Zhengzhou | 0.352  |
| ZD_29 | Zhengzhou | 0.446 | Zhengzhou | 0.5036 |
| ZD_3  | Zhengzhou | 0.546 | Zhengzhou | 0.5096 |
| ZD_30 | Zhengzhou | 0.698 | Zhengzhou | 0.6538 |
| ZD_31 | Zhengzhou | 0.318 | Zhengzhou | 0.309  |
| ZD_32 | Zhengzhou | 0.556 | Zhengzhou | 0.5602 |
| ZD_33 | Zhengzhou | 0.454 | Zhengzhou | 0.4504 |
| ZD_34 | Zhengzhou | 0.538 | Zhengzhou | 0.495  |
| ZD_35 | Zhengzhou | 0.41  | Zhengzhou | 0.4296 |
| ZD_36 | Zhengzhou | 0.818 | Zhengzhou | 0.7462 |
| ZD_37 | Zhengzhou | 0.472 | Zhengzhou | 0.466  |
| ZD_38 | Zhengzhou | 0.586 | Zhengzhou | 0.53   |



|       |           |       |           |        |
|-------|-----------|-------|-----------|--------|
| ZD_39 | Zhengzhou | 0.354 | Zhengzhou | 0.3586 |
| ZD_4  | Zhengzhou | 0.306 | Zhengzhou | 0.3226 |
| ZD_40 | Zhengzhou | 0.466 | Zhengzhou | 0.4446 |
| ZD_41 | Zhengzhou | 0.636 | Zhengzhou | 0.5852 |
| ZD_42 | Zhengzhou | 0.666 | Zhengzhou | 0.6596 |
| ZD_43 | Zhengzhou | 0.18  | Zhengzhou | 0.2038 |
| ZD_44 | Zhengzhou | 0.312 | Zhengzhou | 0.3332 |
| ZD_45 | Zhengzhou | 0.302 | Zhengzhou | 0.2862 |
| ZD_46 | Zhengzhou | 0.612 | Zhengzhou | 0.5802 |
| ZD_47 | Zhengzhou | 0.668 | Zhengzhou | 0.6292 |
| ZD_48 | Zhengzhou | 0.446 | Zhengzhou | 0.5034 |
| ZD_49 | Zhengzhou | 0.468 | Zhengzhou | 0.496  |
| ZD_5  | Zhengzhou | 0.28  | Zhengzhou | 0.3038 |
| ZD_50 | Zhengzhou | 0.684 | Zhengzhou | 0.652  |
| ZD_51 | Zhengzhou | 0.216 | Zhengzhou | 0.2364 |
| ZD_52 | Zhengzhou | 0.612 | Zhengzhou | 0.6162 |
| ZD_53 | Zhengzhou | 0.37  | Zhengzhou | 0.3664 |
| ZD_54 | Zhengzhou | 0.654 | Zhengzhou | 0.6896 |
| ZD_55 | Zhengzhou | 0.658 | Zhengzhou | 0.6066 |
| ZD_56 | Zhengzhou | 0.364 | Zhengzhou | 0.4062 |
| ZD_57 | Zhengzhou | 0.526 | Zhengzhou | 0.5246 |
| ZD_58 | Zhengzhou | 0.27  | Zhengzhou | 0.2714 |
| ZD_59 | Zhengzhou | 0.326 | Zhengzhou | 0.3598 |
| ZD_6  | Zhengzhou | 0.502 | Zhengzhou | 0.4846 |
| ZD_60 | Zhengzhou | 0.52  | Zhengzhou | 0.4926 |
| ZD_61 | Zhengzhou | 0.568 | Zhengzhou | 0.5228 |
| ZD_62 | Zhengzhou | 0.53  | Zhengzhou | 0.5158 |
| ZD_63 | Zhengzhou | 0.476 | Zhengzhou | 0.4674 |
| ZD_64 | Zhengzhou | 0.686 | Zhengzhou | 0.6456 |
| ZD_65 | Zhengzhou | 0.328 | Zhengzhou | 0.3602 |
| ZD_66 | Zhengzhou | 0.566 | Zhengzhou | 0.57   |
| ZD_67 | Zhengzhou | 0.598 | Zhengzhou | 0.5962 |
| ZD_68 | Zhengzhou | 0.592 | Zhengzhou | 0.6308 |
| ZD_69 | Zhengzhou | 0.358 | Zhengzhou | 0.4026 |
| ZD_7  | Zhengzhou | 0.264 | Zhengzhou | 0.2506 |
| ZD_70 | Zhengzhou | 0.442 | Zhengzhou | 0.4276 |
| ZD_71 | Zhengzhou | 0.57  | Zhengzhou | 0.536  |
| ZD_8  | Zhengzhou | 0.542 | Zhengzhou | 0.5074 |
| ZD_9  | Zhengzhou | 0.758 | Zhengzhou | 0.7194 |
